# Supplementary material for: Governing efficiency and thermoresponsivity of luminescence in dirhenium( v ) molecules by a highly tunable emission mechanism
Source: Royal Society of Chemistry journal article supplement (doi:10.1039/d4qi01943a), 2024-01-01
Supplement: d4qi01943a1.pdf [file d4qi01943a1.pdf]

## SUPPORTING INFORMATION

### Governing efficiency and thermoresponsivity of luminescence in dirhenium(V) molecules by a highly tunable emission mechanism

Michał Liberka,<sup>a,b</sup> Mikolaj Zychowicz,<sup>a,b</sup> Laurine Vasseur,<sup>a,c</sup> James Hooper,<sup>a</sup> and Szymon Chorazy<sup>\*,a</sup>

<sup>a</sup>Faculty of Chemistry, Jagiellonian University, Gronostajowa 2, 30-387 Kraków, Poland

<sup>b</sup>Doctoral School of Exact and Natural Sciences, Jagiellonian University, Łojasiewicza 11, 30-348 Kraków, Poland

<sup>c</sup>Université Paris Cité and CNRS, ITODYS, F-75006 Paris, France

\*Corresponding author: simon.chorazy@uj.edu.pl

|                                                                                                                                                                                                                                                                                                                                                                                                                                                                                                                                                                                                            |             |
|------------------------------------------------------------------------------------------------------------------------------------------------------------------------------------------------------------------------------------------------------------------------------------------------------------------------------------------------------------------------------------------------------------------------------------------------------------------------------------------------------------------------------------------------------------------------------------------------------------|-------------|
| Thermogravimetric (TG) curves for the whole series of <b>Re<sub>2</sub>-L</b> materials. (Fig. S1)                                                                                                                                                                                                                                                                                                                                                                                                                                                                                                         | - S2        |
| Infrared (IR) absorption spectra for the whole series of <b>Re<sub>2</sub>-L</b> materials. (Fig. S2)                                                                                                                                                                                                                                                                                                                                                                                                                                                                                                      | - S3        |
| Crystal data and structure refinement parameters for <b>Re<sub>2</sub>-L</b> materials under variable temperature conditions. (Tables S1-S8)                                                                                                                                                                                                                                                                                                                                                                                                                                                               | - S4-S27    |
| Detailed structural views, crystal structure parameters, and temperature variation of unit cell parameters and bond lengths within bimetallic {Re <sup>V</sup> <sub>2</sub> } <sup>4-</sup> assemblies in the structure of all obtained materials of <b>Re<sub>2</sub>-L</b> . (Fig. S3-S18, Tables S9-S16)                                                                                                                                                                                                                                                                                                | - S28-S51   |
| Orientation of dinuclear {Re <sup>V</sup> <sub>2</sub> } <sup>4-</sup> molecular anions in the unit cell of the crystal structure of <b>Re<sub>2</sub>-L</b> materials. (Fig. S19)                                                                                                                                                                                                                                                                                                                                                                                                                         | - S52       |
| Results of Continuous Shape Measure analysis for rhenium(V) complexes in the crystal structure of <b>Re<sub>2</sub>-L</b> materials. (Tables S17-S24)                                                                                                                                                                                                                                                                                                                                                                                                                                                      | - S53-S57   |
| Temperature variation of the OC-6 Continuous Shape Measure parameters for rhenium(V) complexes in the crystal structure of <b>Re<sub>2</sub>-L</b> materials, and the related comment. (Fig. S20)                                                                                                                                                                                                                                                                                                                                                                                                          | - S58-S59   |
| Comparison of experimental and calculated powder X-ray diffraction patterns for the whole series of <b>Re<sub>2</sub>-L</b> materials. (Fig. S21)                                                                                                                                                                                                                                                                                                                                                                                                                                                          | - S60       |
| Solid-state room-temperature UV-vis absorption spectra of all <b>Re<sub>2</sub>-L</b> materials. (Fig. S22)                                                                                                                                                                                                                                                                                                                                                                                                                                                                                                | - S61       |
| Crystal data, structure refinement, and detailed crystal structure parameters of the reference compound <b>Re-en</b> , as well as the related representative structural views. (Fig. S23, Table S25)                                                                                                                                                                                                                                                                                                                                                                                                       | - S62       |
| Comparison of the emission spectra at 77 and 300 K, and the related spectroscopic parameters of the reference compounds of <b>Re-L</b> and selected reported <b>Re<sub>2</sub>-L</b> materials. (Fig. S24, Table S26)                                                                                                                                                                                                                                                                                                                                                                                      | - S63       |
| Representative graphs illustrating solid-state photoluminescent properties of <b>Re<sub>2</sub>-L</b> materials and tables containing their selected spectroscopic parameters. (Fig. S25-S32, Tables S27-S42)                                                                                                                                                                                                                                                                                                                                                                                              | - S64-S87   |
| Description of the molecular DFT/TD-DFT theoretical calculations, and their results obtained using the Gaussian software, including the metric parameters of optimized geometries, contour plots of chosen MO corresponding to the TD-DFT theoretical calculations, the excitation and emission energies predicted for the lowest energy excited states, and the related comparison with the experiment, all sets for the whole series of <b>Re<sub>2</sub>-L</b> materials, as well as the analogous sets for results obtained using ORCA software for selected compounds. (Fig. S33-S46, Tables S43-S62) | - S88-S116  |
| Description of the periodic DFT calculations for selected <b>Re<sub>2</sub>-L</b> materials and the related results including computed bond distances in optimized geometries, computed interaction energies, computed density of states, and computed energy spacings corresponding to the observed emission events. (Fig. S47, Tables S63-S65)                                                                                                                                                                                                                                                           | - S117-S119 |
| Temperature dependencies of selected spectroscopic parameters of <b>Re<sub>2</sub>-L</b> materials, shown together with the related relative thermal sensitivity curves and thermal repeatability cycles. (Fig. S48-S63)                                                                                                                                                                                                                                                                                                                                                                                   | - S120-S135 |
| Best-fit parameters for the linear and Mott-Seitz fittings of the temperature dependencies of selected spectroscopic parameters for <b>Re<sub>2</sub>-L</b> materials. (Tables S66-S70)                                                                                                                                                                                                                                                                                                                                                                                                                    | - S136-S140 |
| Temperature-variable emission decay profiles for <b>Re<sub>2</sub>-L</b> materials, shown with the best-fit curves to the double exponential function and the related best-fit parameters. (Fig. S64-S70, Tables S71-S77)                                                                                                                                                                                                                                                                                                                                                                                  | - S141-S166 |
| Temperature dependencies of the emission lifetimes for <b>Re<sub>2</sub>-L</b> materials, shown together with the related relative thermal sensitivity and thermal repeatability curves. (Fig. S71 and S72)                                                                                                                                                                                                                                                                                                                                                                                                | - S167-S168 |
| Best-fit parameters for the exponential fitting of the temperature dependencies of average emission lifetime for <b>Re<sub>2</sub>-L</b> materials. (Table S78)                                                                                                                                                                                                                                                                                                                                                                                                                                            | - S169      |
| The detailed insight into the dependence of emission maximum energy on the Re1-N1 and Re1-N6 bond distances under variable temperatures in all obtained materials of <b>Re<sub>2</sub>-L</b> . (Fig. S73)                                                                                                                                                                                                                                                                                                                                                                                                  | - S170      |
| The correlation of non-radiative decay rate constant with the emission energies in <b>Re<sub>2</sub>-L</b> . (Fig. S74)                                                                                                                                                                                                                                                                                                                                                                                                                                                                                    | - S171      |
| References to the Supporting Information.                                                                                                                                                                                                                                                                                                                                                                                                                                                                                                                                                                  | - S172-173  |

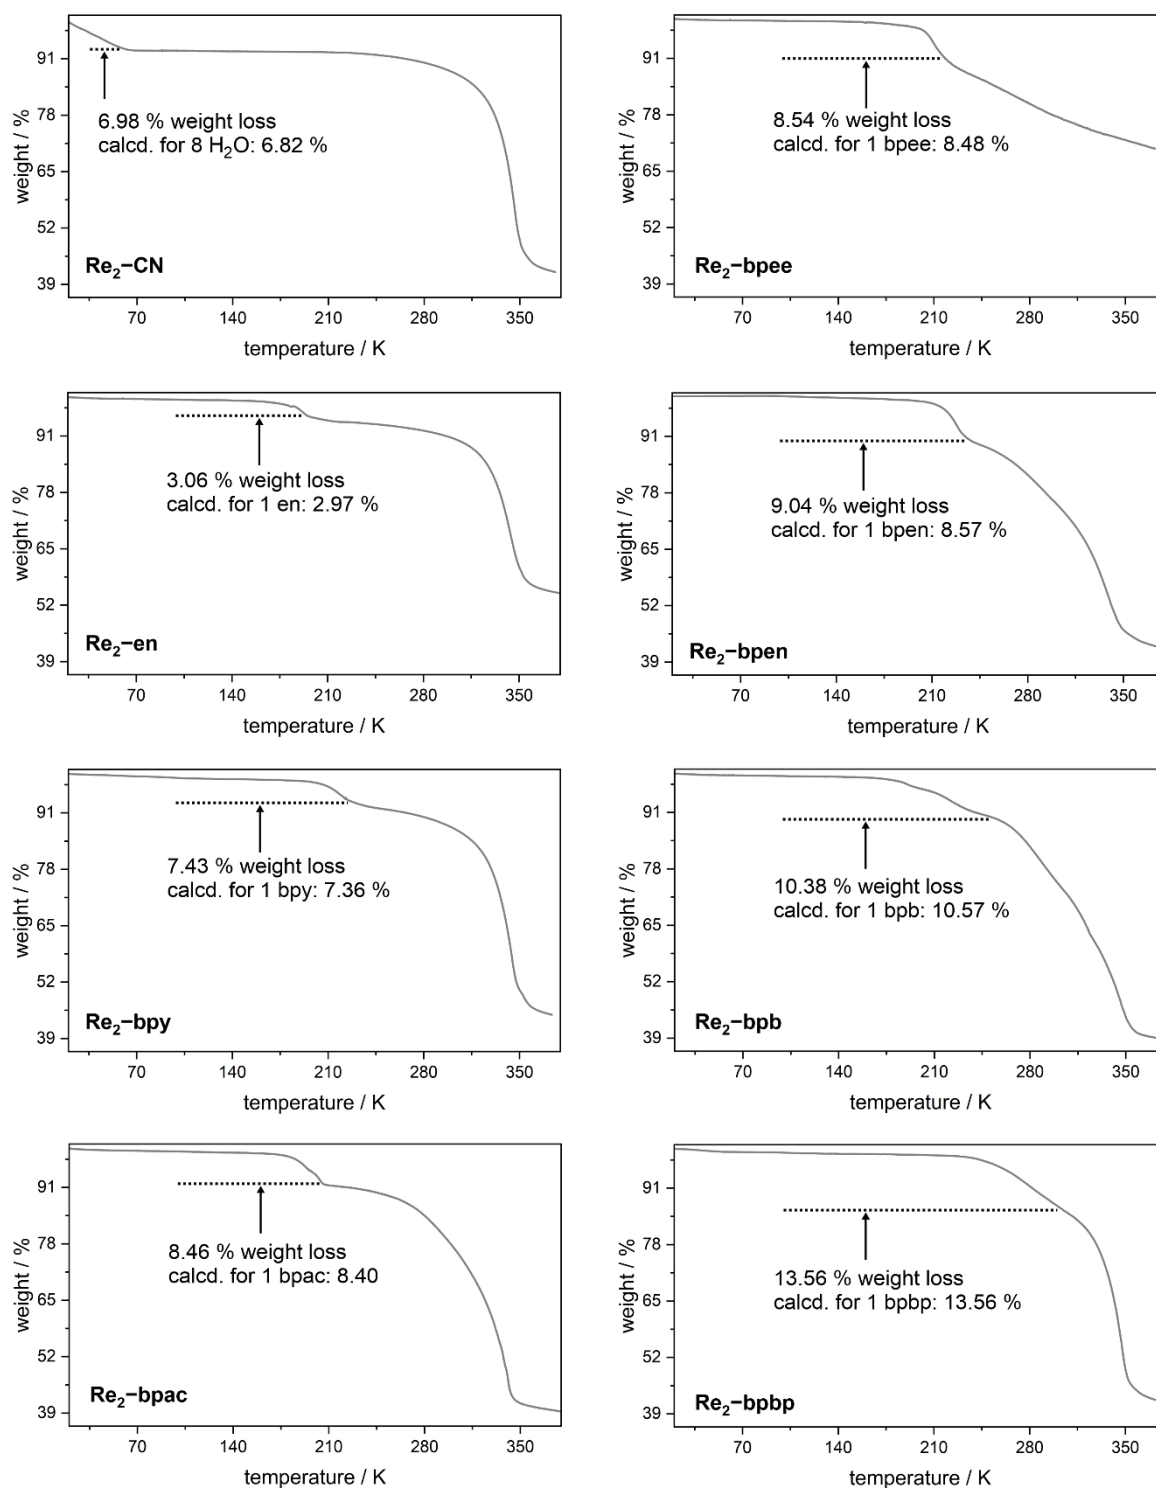

**Fig. S1** Thermogravimetric (TG) curves collected in the temperature range of 20–390 °C for crystalline samples of  $\text{Re}_2\text{-CN}$ ,  $\text{Re}_2\text{-en}$ ,  $\text{Re}_2\text{-bpy}$ ,  $\text{Re}_2\text{-bpac}$ ,  $\text{Re}_2\text{-bpee}$ ,  $\text{Re}_2\text{-bpen}$ ,  $\text{Re}_2\text{-bpb}$ , and  $\text{Re}_2\text{-bpbp}$ . The steps related to the loss of water molecules, diamine, or diimine ligands (depending on the material) are depicted.

**Comment to Fig. S1:** All presented compounds are stable with heating up to ca. 200 °C when the two-step weight loss of the sample mass is detected. The first can be ascribed to the loss of an organic linker connecting the Re(V) centers (except for  $\text{Re}_2\text{-CN}$ , where water molecules are present and removed under heating). The related weight loss is consistent with the theoretical value in each case (as depicted in the Fig. S1). The mass decrease at higher temperatures is related to the loss of cyanido ligands leading to the sample decomposition. No mass changes below 100 °C prove that the methanol molecules, initially present in the materials after syntheses, were removed when the crystals were air-dried. The only exception to this is the  $\text{Re}_2\text{-CN}$  compound, where the weight loss below 100 °C results from the removal of water molecules of crystallization.

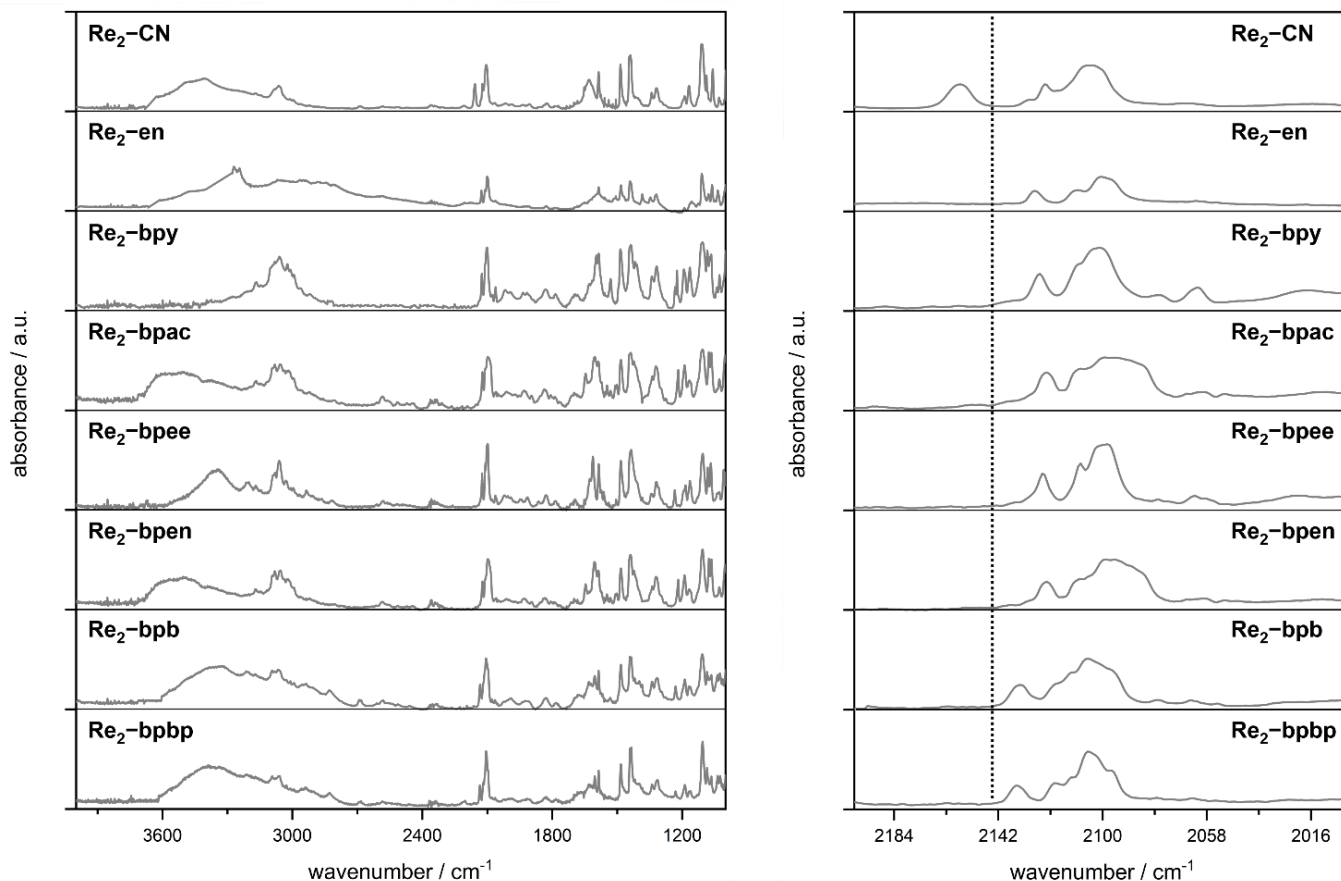

**Fig. S2** Infrared (IR) absorption spectra of crystalline samples of **Re<sub>2</sub>-CN**, **Re<sub>2</sub>-en**, **Re<sub>2</sub>-bpy**, **Re<sub>2</sub>-bpac**, **Re<sub>2</sub>-bpee**, **Re<sub>2</sub>-bpen**, **Re<sub>2</sub>-bpb**, and **Re<sub>2</sub>-bpbp** presented in the broad 4000–1000 cm<sup>-1</sup> region (left), and in the limited 2200–2000 cm<sup>-1</sup> related to cyanido stretching vibrations (right).

**Comment to Fig. S2:** The IR spectra of the crystalline samples of **Re<sub>2</sub>-CN**, **Re<sub>2</sub>-en**, **Re<sub>2</sub>-bpy**, **Re<sub>2</sub>-bpac**, **Re<sub>2</sub>-bpee**, **Re<sub>2</sub>-bpen**, **Re<sub>2</sub>-bpb**, and **Re<sub>2</sub>-bpbp** are very similar. In all samples, the wide absorption above 2850 cm<sup>-1</sup>, as well as the extensive area of absorption bands in the 1500–700 cm<sup>-1</sup> range, are related to the stretching and skeletal vibrations of organic ligands and PPh<sub>4</sub><sup>+</sup> cations. In the range of 2145–2070 cm<sup>-1</sup>, characteristic peaks related to stretching vibrations of terminal cyanido ligands can be observed. In the infrared absorption spectra of **Re<sub>2</sub>-CN**, also higher energy bands above 2145 cm<sup>-1</sup> are observed, which can be attributed to stretching cyanido vibrations within the Re<sup>V</sup>-N≡C-Re<sup>V</sup> linkages (i.e., bridging cyanido ligands). Those results are in line with the single-crystal structural analysis for reported materials and previous works on similar compounds.<sup>[S1,S2]</sup>

**Table S1** Crystal data and structure refinement parameters for **Re<sub>2</sub>-CN**.

| compound                                | Re <sub>2</sub> -CN                                                                            |                  |                  |                  |
|-----------------------------------------|------------------------------------------------------------------------------------------------|------------------|------------------|------------------|
| formula                                 | C <sub>104</sub> H <sub>96</sub> N <sub>10</sub> O <sub>8</sub> P <sub>4</sub> Re <sub>2</sub> |                  |                  |                  |
| formula weight / g·mol <sup>-1</sup>    | 2110.21                                                                                        |                  |                  |                  |
| $\lambda$ / Å                           | 0.71073 Å (Mo K $\alpha$ )                                                                     |                  |                  |                  |
| $T$ / K                                 | 100(2)                                                                                         | 120(2)           | 140(2)           | 160(2)           |
| crystal system                          | triclinic                                                                                      |                  |                  |                  |
| space group                             | $P-1$                                                                                          |                  |                  |                  |
| $a$ / Å                                 | 13.9923(5)                                                                                     | 14.0034(6)       | 14.0159(6)       | 14.0299(7)       |
| $b$ / Å                                 | 14.1642(6)                                                                                     | 14.1745(6)       | 14.1869(6)       | 14.2017(7)       |
| $c$ / Å                                 | 25.3154(9)                                                                                     | 25.3337(10)      | 25.3565(10)      | 25.3809(12)      |
| $\alpha$ / deg                          | 103.6180(10)                                                                                   | 103.5990(10)     | 103.6050(10)     | 103.583(2)       |
| $\beta$ / deg                           | 103.4640(10)                                                                                   | 103.4880(10)     | 103.5190(10)     | 103.539(2)       |
| $\gamma$ / deg                          | 92.1280(10)                                                                                    | 92.1190(10)      | 92.0740(10)      | 92.051(2)        |
| $V$ / Å <sup>3</sup>                    | 4719.7(3)                                                                                      | 4730.3(3)        | 4742.5(3)        | 4757.0(4)        |
| $Z$                                     | 2                                                                                              | 2                | 2                | 2                |
| calcd. density / g·cm <sup>-3</sup>     | 1.485                                                                                          | 1.482            | 1.478            | 1.473            |
| abs. coeff. / cm <sup>-1</sup>          | 2.693                                                                                          | 2.687            | 2.680            | 2.672            |
| $F(000)$                                | 2128                                                                                           | 2128             | 2128             | 2128             |
| $\theta$ range / deg                    | 2.531–25.027                                                                                   | 2.529–25.027     | 2.527–25.027     | 2.524–25.027     |
| collected refl.                         | 75574                                                                                          | 75975            | 76043            | 76444            |
| $R_{\text{int}}$                        | 0.0747                                                                                         | 0.0773           | 0.0777           | 0.0775           |
| completeness / %                        | 99.9                                                                                           | 99.9             | 99.9             | 99.9             |
| data/restraints/parameters              | 16654/41/1216                                                                                  | 16691/41/1216    | 16729/41/1216    | 16778/21/1216    |
| GOF on $F^2$                            | 1.015                                                                                          | 1.013            | 1.013            | 1.016            |
| final $R_1$ [ $I > 2\sigma(I)$ ]        | 0.0367                                                                                         | 0.0378           | 0.0377           | 0.0375           |
| final $wR_2$ [all data]                 | 0.0705                                                                                         | 0.0723           | 0.0715           | 0.0723           |
| diff. peak and hole / e·Å <sup>-3</sup> | 1.447 and -0.671                                                                               | 1.116 and -0.729 | 0.926 and -0.720 | 0.894 and -0.778 |

**Table S1** (continuation) Crystal data and structure refinement parameters for **Re<sub>2</sub>-CN**.

| compound                                | Re <sub>2</sub> -CN                                                                            |                  |                  |                  |
|-----------------------------------------|------------------------------------------------------------------------------------------------|------------------|------------------|------------------|
| formula                                 | C <sub>104</sub> H <sub>96</sub> N <sub>10</sub> O <sub>8</sub> P <sub>4</sub> Re <sub>2</sub> |                  |                  |                  |
| formula weight / g·mol <sup>-1</sup>    | 2110.21                                                                                        |                  |                  |                  |
| $\lambda$ / Å                           | 0.71073 Å (Mo K $\alpha$ )                                                                     |                  |                  |                  |
| $T$ / K                                 | 180(2)                                                                                         | 200(2)           | 220(2)           | 240(2)           |
| crystal system                          | triclinic                                                                                      |                  |                  |                  |
| space group                             | $P-1$                                                                                          |                  |                  |                  |
| $a$ / Å                                 | 14.0373(8)                                                                                     | 14.0563(7)       | 14.0726(5)       | 14.0953(4)       |
| $b$ / Å                                 | 14.2090(8)                                                                                     | 14.2270(7)       | 14.2406(5)       | 14.2538(4)       |
| $c$ / Å                                 | 25.3857(13)                                                                                    | 25.4144(12)      | 25.4424(8)       | 25.4628(6)       |
| $\alpha$ / deg                          | 103.545(2)                                                                                     | 103.521(2)       | 103.5210(10)     | 103.5400(10)     |
| $\beta$ / deg                           | 103.557(2)                                                                                     | 103.580(2)       | 103.6160(10)     | 103.6440(10)     |
| $\gamma$ / deg                          | 92.064(2)                                                                                      | 92.073(2)        | 92.0980(10)      | 92.1340(10)      |
| $V$ / Å <sup>3</sup>                    | 4763.1(5)                                                                                      | 4781.0(4)        | 4795.4(3)        | 4810.0(2)        |
| $Z$                                     | 2                                                                                              | 2                | 2                | 2                |
| calcd. density / g·cm <sup>-3</sup>     | 1.471                                                                                          | 1.466            | 1.461            | 1.457            |
| abs. coeff. / cm <sup>-1</sup>          | 2.668                                                                                          | 2.659            | 2.651            | 2.642            |
| $F(000)$                                | 2128                                                                                           | 2128             | 2128             | 2128             |
| $\theta$ range / deg                    | 2.176–25.026                                                                                   | 2.519–25.028     | 2.517–25.027     | 2.516–25.027     |
| collected refl.                         | 76641                                                                                          | 77079            | 77330            | 77612            |
| $R_{\text{int}}$                        | 0.0787                                                                                         | 0.0799           | 0.0809           | 0.0826           |
| completeness / %                        | 99.9                                                                                           | 99.9             | 99.9             | 99.9             |
| data/restraints/parameters              | 16799/41/1216                                                                                  | 16857/41/1216    | 16913/41/1216    | 16965/41/1216    |
| GOF on $F^2$                            | 1.018                                                                                          | 1.001            | 1.005            | 1.017            |
| final $R_1$ [ $I > 2\sigma(I)$ ]        | 0.0381                                                                                         | 0.0393           | 0.0398           | 0.0411           |
| final $wR_2$ [all data]                 | 0.0757                                                                                         | 0.0823           | 0.0798           | 0.0818           |
| diff. peak and hole / e·Å <sup>-3</sup> | 1.192 and -0.65                                                                                | 1.373 and -0.712 | 1.262 and -0.649 | 1.485 and -0.707 |

**Table S1** (continuation) Crystal data and structure refinement parameters for **Re<sub>2</sub>-CN**.

| compound                                | Re <sub>2</sub> -CN                                                                            |                  |                  |   |
|-----------------------------------------|------------------------------------------------------------------------------------------------|------------------|------------------|---|
| formula                                 | C <sub>104</sub> H <sub>96</sub> N <sub>10</sub> O <sub>8</sub> P <sub>4</sub> Re <sub>2</sub> |                  |                  | – |
| formula weight / g·mol <sup>-1</sup>    | 2110.21                                                                                        |                  |                  | – |
| $\lambda$ / Å                           | 0.71073 Å (Mo K $\alpha$ )                                                                     |                  |                  | – |
| $T$ / K                                 | 260(2)                                                                                         | 280(2)           | 300(2)           |   |
| crystal system                          | triclinic                                                                                      |                  |                  | – |
| space group                             | $P-1$                                                                                          |                  |                  | – |
| $a$ / Å                                 | 14.1206(3)                                                                                     | 14.1590(4)       | 14.198(6)        | – |
| $b$ / Å                                 | 14.2661(4)                                                                                     | 14.2832(4)       | 14.301(6)        | – |
| $c$ / Å                                 | 25.4760(6)                                                                                     | 25.4884(6)       | 25.516(11)       | – |
| $\alpha$ / deg                          | 103.5730(10)                                                                                   | 103.6220(10)     | 103.684(13)      | – |
| $\beta$ / deg                           | 103.6710(10)                                                                                   | 103.6870(10)     | 103.703(13)      | – |
| $\gamma$ / deg                          | 92.1900(10)                                                                                    | 92.2990(10)      | 92.366(13)       | – |
| $V$ / Å <sup>3</sup>                    | 4823.5(2)                                                                                      | 4842.3(2)        | 4890(4)          | – |
| $Z$                                     | 2                                                                                              | 2                | 2                | – |
| calcd. density / g·cm <sup>-3</sup>     | 1.453                                                                                          | 1.447            | 1.433            | – |
| abs. coeff. / cm <sup>-1</sup>          | 2.635                                                                                          | 2.625            | 2.599            | – |
| $F(000)$                                | 2128                                                                                           | 2128             | 2128             | – |
| $\theta$ range / deg                    | 2.516<br>25.027                                                                                | 2.516<br>25.027  | 2.519<br>25.027  | – |
| collected refl.                         | 77895                                                                                          | 78090            | 78643            | – |
| $R_{\text{int}}$                        | 0.0860                                                                                         | 0.0898           | 0.1011           | – |
| completeness / %                        | 99.9                                                                                           | 99.9             | 99.9             | – |
| data/restraints/parameters              | 17011/41/1216                                                                                  | 17078/41/1216    | 17247/25/1163    | – |
| GOF on $F^2$                            | 1.006                                                                                          | 1.029            | 1.013            | – |
| final $R_1$ [ $I > 2\sigma(I)$ ]        | 0.0435                                                                                         | 0.0459           | 0.0529           | – |
| final $wR_2$ [all data]                 | 0.0912                                                                                         | 0.0981           | 0.1263           | – |
| diff. peak and hole / e·Å <sup>-3</sup> | 1.564 and -0.616                                                                               | 1.690 and -0.973 | 2.028 and -0.967 | – |

**Table S2** Crystal data and structure refinement parameters for **Re<sub>2</sub>-en**.

| compound                                | Re <sub>2</sub> -en                                                                            |                  |                  |                  |
|-----------------------------------------|------------------------------------------------------------------------------------------------|------------------|------------------|------------------|
| formula                                 | C <sub>110</sub> H <sub>88</sub> N <sub>12</sub> O <sub>4</sub> P <sub>4</sub> Re <sub>2</sub> |                  |                  |                  |
| formula weight / g·mol <sup>-1</sup>    | 2137.22                                                                                        |                  |                  |                  |
| $\lambda$ / Å                           | 0.71073 Å (Mo K $\alpha$ )                                                                     |                  |                  |                  |
| $T$ / K                                 | 100(2)                                                                                         | 120(2)           | 140(2)           | 160(2)           |
| crystal system                          | triclinic                                                                                      |                  |                  |                  |
| space group                             | $P-1$                                                                                          |                  |                  |                  |
| $a$ / Å                                 | 13.1236(4)                                                                                     | 13.1444(4)       | 13.1660(4)       | 13.1933(4)       |
| $b$ / Å                                 | 14.9709(5)                                                                                     | 14.9928(4)       | 15.0152(4)       | 15.0423(4)       |
| $c$ / Å                                 | 28.1670(8)                                                                                     | 28.1685(8)       | 28.1764(8)       | 28.1950(8)       |
| $\alpha$ / deg                          | 98.7810(10)                                                                                    | 98.7650(10)      | 98.7440(10)      | 98.7200(10)      |
| $\beta$ / deg                           | 98.4310(10)                                                                                    | 98.4560(10)      | 98.4740(10)      | 98.5000(10)      |
| $\gamma$ / deg                          | 111.2940(10)                                                                                   | 111.3640(10)     | 111.4340(10)     | 111.5050(10)     |
| $V$ / Å <sup>3</sup>                    | 4971.6(3)                                                                                      | 4984.1(2)        | 4998.5(2)        | 5018.4(3)        |
| $Z$                                     | 2                                                                                              | 2                | 2                | 2                |
| calcd. density / g·cm <sup>-3</sup>     | 1.428                                                                                          | 1.424            | 1.420            | 1.414            |
| abs. coeff. / cm <sup>-1</sup>          | 2.556                                                                                          | 2.549            | 2.542            | 2.532            |
| $F(000)$                                | 2146                                                                                           | 2146             | 2146             | 2146             |
| $\theta$ range / deg                    | 2.508–25.027                                                                                   | 2.506–25.027     | 2.505–25.025     | 2.501–25.027     |
| collected refl.                         | 79903                                                                                          | 80340            | 80612            | 81166            |
| $R_{\text{int}}$                        | 0.0302                                                                                         | 0.0305           | 0.0308           | 0.0311           |
| completeness / %                        | 99.8                                                                                           | 99.9             | 99.9             | 99.8             |
| data/restraints/parameters              | 17541/48/1213                                                                                  | 17586/48/1213    | 17633/48/1213    | 17690/48/1213    |
| GOF on $F^2$                            | 1.077                                                                                          | 1.035            | 1.034            | 1.069            |
| final $R_1$ [ $I > 2\sigma(I)$ ]        | 0.0266                                                                                         | 0.0264           | 0.0262           | 0.0261           |
| final $wR_2$ [all data]                 | 0.0655                                                                                         | 0.0699           | 0.0703           | 0.0664           |
| diff. peak and hole / e·Å <sup>-3</sup> | 1.684 and -0.960                                                                               | 1.570 and -1.002 | 1.416 and -0.970 | 1.362 and -0.879 |

**Table S2** (continuation) Crystal data and structure refinement parameters for **Re<sub>2</sub>-en**.

| compound                                | Re <sub>2</sub> -en                                                                            |                  |                  |                  |
|-----------------------------------------|------------------------------------------------------------------------------------------------|------------------|------------------|------------------|
| formula                                 | C <sub>110</sub> H <sub>88</sub> N <sub>12</sub> O <sub>4</sub> P <sub>4</sub> Re <sub>2</sub> |                  |                  |                  |
| formula weight / g·mol <sup>-1</sup>    | 2137.22                                                                                        |                  |                  |                  |
| $\lambda$ / Å                           | 0.71073 Å (Mo K $\alpha$ )                                                                     |                  |                  |                  |
| $T$ / K                                 | 180(2)                                                                                         | 200(2)           | 220(2)           | 240(2)           |
| crystal system                          | triclinic                                                                                      |                  |                  |                  |
| space group                             | $P-1$                                                                                          |                  |                  |                  |
| $a$ / Å                                 | 13.2171(4)                                                                                     | 13.2418(4)       | 13.2624(5)       | 13.2865(4)       |
| $b$ / Å                                 | 15.0643(5)                                                                                     | 15.0883(5)       | 15.1080(5)       | 15.1313(4)       |
| $c$ / Å                                 | 28.2084(8)                                                                                     | 28.2265(9)       | 28.2447(9)       | 28.2656(8)       |
| $\alpha$ / deg                          | 98.6940(10)                                                                                    | 98.6710(10)      | 98.6400(10)      | 98.6090(10)      |
| $\beta$ / deg                           | 98.5230(10)                                                                                    | 98.5490(10)      | 98.5790(10)      | 98.5800(10)      |
| $\gamma$ / deg                          | 111.5790(10)                                                                                   | 111.6520(10)     | 111.7180(10)     | 111.8150(10)     |
| $V$ / Å <sup>3</sup>                    | 5034.3(3)                                                                                      | 5052.0(3)        | 5067.1(3)        | 5084.7(3)        |
| $Z$                                     | 2                                                                                              | 2                | 2                | 2                |
| calcd. density / g·cm <sup>-3</sup>     | 1.410                                                                                          | 1.405            | 1.401            | 1.396            |
| abs. coeff. / cm <sup>-1</sup>          | 2.524                                                                                          | 2.515            | 2.507            | 2.499            |
| $F(000)$                                | 2146                                                                                           | 2146             | 2146             | 2146             |
| $\theta$ range / deg                    | 2.499–25.027                                                                                   | 2.496–25.027     | 2.400–25.027     | 2.398–26.365     |
| collected refl.                         | 81420                                                                                          | 82265            | 82482            | 91405            |
| $R_{\text{int}}$                        | 0.0317                                                                                         | 0.0619           | 0.0327           | 0.0352           |
| completeness / %                        | 99.8                                                                                           | 99.9             | 99.9             | 99.8             |
| data/restraints/parameters              | 17734/48/1213                                                                                  | 17804/48/1213    | 17843/48/1213    | 20729/48/1213    |
| GOF on $F^2$                            | 1.017                                                                                          | 1.037            | 1.051            | 1.046            |
| final $R_1$ [ $I > 2\sigma(I)$ ]        | 0.0262                                                                                         | 0.0398           | 0.0270           | 0.0296           |
| final $wR_2$ [all data]                 | 0.0716                                                                                         | 0.1116           | 0.0690           | 0.0763           |
| diff. peak and hole / e·Å <sup>-3</sup> | 1.384 and -0.824                                                                               | 1.484 and -2.076 | 1.282 and -0.778 | 1.309 and -0.689 |



**Table S2** (cont.) Crystal data and structure refinement parameters for **Re<sub>2</sub>-en**.

| compound                                | Re <sub>2</sub> -en                                                                            |                  |                  |   |
|-----------------------------------------|------------------------------------------------------------------------------------------------|------------------|------------------|---|
| formula                                 | C <sub>110</sub> H <sub>88</sub> N <sub>12</sub> O <sub>4</sub> P <sub>4</sub> Re <sub>2</sub> |                  |                  | – |
| formula weight / g·mol <sup>-1</sup>    | 2137.22                                                                                        |                  |                  | – |
| $\lambda$ / Å                           | 0.71073 Å (Mo K $\alpha$ )                                                                     |                  |                  | – |
| $T$ / K                                 | 260(2)                                                                                         | 280(2)           | 300(2)           | – |
| crystal system                          | triclinic                                                                                      |                  |                  | – |
| space group                             | $P-1$                                                                                          |                  |                  | – |
| $a$ / Å                                 | 13.3110(4)                                                                                     | 13.3463(6)       | 13.3522(15)      | – |
| $b$ / Å                                 | 15.1554(4)                                                                                     | 15.1859(7)       | 15.2047(16)      | – |
| $c$ / Å                                 | 28.2862(8)                                                                                     | 28.3267(12)      | 28.325(3)        | – |
| $\alpha$ / deg                          | 98.5690(10)                                                                                    | 98.5010(10)      | 98.515(3)        | – |
| $\beta$ / deg                           | 98.5850(10)                                                                                    | 98.615(2)        | 98.557(4)        | – |
| $\gamma$ / deg                          | 111.9170(10)                                                                                   | 112.031(2)       | 112.143(4)       | – |
| $V$ / Å <sup>3</sup>                    | 5102.5(3)                                                                                      | 5129.9(4)        | 5134.6(10)       | – |
| $Z$                                     | 2                                                                                              | 2                | 2                | – |
| calcd. density / g·cm <sup>-3</sup>     | 1.391                                                                                          | 1.384            | 1.382            | – |
| abs. coeff. / cm <sup>-1</sup>          | 2.490                                                                                          | 2.477            | 2.474            | – |
| $F(000)$                                | 2146                                                                                           | 2146             | 2146             | – |
| $\theta$ range / deg                    | 2.397–25.027                                                                                   | 2.394–25.026     | 2.393–25.028     | – |
| collected refl.                         | 82657                                                                                          | 83595            | 83479            | – |
| $R_{\text{int}}$                        | 0.0340                                                                                         | 0.0347           | 0.0356           | – |
| completeness / %                        | 99.8                                                                                           | 99.9             | 99.9             | – |
| data/restraints/parameters              | 17734/48/1213                                                                                  | 18080/48/1213    | 18100/48/1213    | – |
| GOF on $F^2$                            | 1.003                                                                                          | 1.047            | 1.006            | – |
| final $R_1$ [ $I > 2\sigma(I)$ ]        | 0.0282                                                                                         | 0.0294           | 0.0302           | – |
| final $wR_2$ [all data]                 | 0.0754                                                                                         | 0.0746           | 0.0822           | – |
| diff. peak and hole / e·Å <sup>-3</sup> | 1.148 and -0.583                                                                               | 1.118 and -0.634 | 1.048 and -0.639 | – |

**Table S3** Crystal data and structure refinement parameters for **Re<sub>2</sub>-bpy**.

| compound                                | Re <sub>2</sub> -bpy                                                            |                  |                  |                  |
|-----------------------------------------|---------------------------------------------------------------------------------|------------------|------------------|------------------|
| formula                                 | C <sub>114</sub> H <sub>88</sub> N <sub>12</sub> P <sub>4</sub> Re <sub>2</sub> |                  |                  |                  |
| formula weight / g·mol <sup>-1</sup>    | 2122.26                                                                         |                  |                  |                  |
| $\lambda$ / Å                           | 0.71073 Å (Mo K $\alpha$ )                                                      |                  |                  |                  |
| $T$ / K                                 | 100(2)                                                                          | 120(2)           | 140(2)           | 160(2)           |
| crystal system                          | monoclinic                                                                      |                  |                  |                  |
| space group                             | $P 2_1/c$                                                                       |                  |                  |                  |
| $a$ / Å                                 | 20.5759(17)                                                                     | 20.5801(12)      | 20.5890(9)       | 20.5985(8)       |
| $b$ / Å                                 | 13.1338(11)                                                                     | 13.1593(8)       | 13.1770(6)       | 13.1960(6)       |
| $c$ / Å                                 | 19.7224(17)                                                                     | 19.7375(11)      | 19.7443(9)       | 19.7530(8)       |
| $\alpha$ / deg                          | 90                                                                              | 90               | 90               | 90               |
| $\beta$ / deg                           | 116.435(2)                                                                      | 116.390(2)       | 116.3770(10)     | 116.3530(10)     |
| $\gamma$ / deg                          | 90                                                                              | 90               | 90               | 90               |
| $V$ / Å <sup>3</sup>                    | 4772.5(7)                                                                       | 4788.3(5)        | 4799.0(4)        | 4811.2(3)        |
| $Z$                                     | 2                                                                               | 2                | 2                | 2                |
| calcd. density / g·cm <sup>-3</sup>     | 1.477                                                                           | 1.472            | 1.469            | 1.465            |
| abs. coeff. / cm <sup>-1</sup>          | 2.659                                                                           | 2.650            | 2.644            | 2.637            |
| $F(000)$                                | 2132                                                                            | 2132             | 2132             | 2132             |
| $\theta$ range / deg                    | 2.52–25.682                                                                     | 2.581–25.682     | 2.462–25.681     | 2.46–25.681      |
| collected refl.                         | 54731                                                                           | 55667            | 55512            | 57943            |
| $R_{\text{int}}$                        | 0.0350                                                                          | 0.0976           | 0.0970           | 0.0959           |
| completeness / %                        | 99.9                                                                            | 99.9             | 99.9             | 99.9             |
| data/restraints/parameters              | 9038/0/595                                                                      | 9069/0/595       | 9038/0/595       | 9038/0/595       |
| GOF on $F^2$                            | 1.062                                                                           | 1.061            | 1.054            | 1.066            |
| final $R_1$ [ $I > 2\sigma(I)$ ]        | 0.0233                                                                          | 0.0311           | 0.0306           | 0.0316           |
| final $wR_2$ [all data]                 | 0.0533                                                                          | 0.0834           | 0.0830           | 0.0844           |
| diff. peak and hole / e·Å <sup>-3</sup> | 1.194 and -0.610                                                                | 1.805 and -1.442 | 1.637 and -1.399 | 1.791 and -1.383 |

**Table S3** (continuation) Crystal data and structure refinement parameters for **Re<sub>2</sub>-bpy**.

| compound                                | Re <sub>2</sub> -bpy                                                            |                  |                  |                  |
|-----------------------------------------|---------------------------------------------------------------------------------|------------------|------------------|------------------|
| formula                                 | C <sub>114</sub> H <sub>88</sub> N <sub>12</sub> P <sub>4</sub> Re <sub>2</sub> |                  |                  |                  |
| formula weight / g·mol <sup>-1</sup>    | 2122.26                                                                         |                  |                  |                  |
| λ / Å                                   | 0.71073 Å (Mo Kα)                                                               |                  |                  |                  |
| T / K                                   | 180(2)                                                                          | 200(2)           | 220(2)           | 240(2)           |
| crystal system                          | monoclinic                                                                      |                  |                  |                  |
| space group                             | P 2 <sub>1</sub> /c                                                             |                  |                  |                  |
| a / Å                                   | 20.6151(13)                                                                     | 20.6315(10)      | 20.6466(9)       | 20.6596(6)       |
| b / Å                                   | 13.2176(8)                                                                      | 13.2387(6)       | 13.2616(6)       | 13.2791(4)       |
| c / Å                                   | 19.7617(12)                                                                     | 19.7707(9)       | 19.7818(9)       | 19.7936(6)       |
| α / deg                                 | 90                                                                              | 90               | 90               | 90               |
| β / deg                                 | 116.336(2)                                                                      | 116.3120(10)     | 116.2890(10)     | 116.2660(10)     |
| γ / deg                                 | 90                                                                              | 90               | 90               | 90               |
| V / Å <sup>3</sup>                      | 4825.8(5)                                                                       | 4840.6(4)        | 4856.2(4)        | 4869.5(3)        |
| Z                                       | 2                                                                               | 2                | 2                | 2                |
| calcd. density / g·cm <sup>-3</sup>     | 1.461                                                                           | 1.456            | 1.451            | 1.447            |
| abs. coeff. / cm <sup>-1</sup>          | 2.629                                                                           | 2.621            | 2.613            | 2.606            |
| F(000)                                  | 2132                                                                            | 2132             | 2132             | 2132             |
| θ range / deg                           | 2.690–25.027                                                                    | 2.454–25.681     | 2.451–26.371     | 2.448–25.681     |
| collected refl.                         | 56343                                                                           | 60006            | 63729            | 60613            |
| R <sub>int</sub>                        | 0.0299                                                                          | 0.0967           | 0.0981           | 0.0963           |
| completeness / %                        | 99.9                                                                            | 99.9             | 99.9             | 99.9             |
| data/restraints/parameters              | 8525/0/595                                                                      | 9172/0/595       | 9923/0/595       | 9224/0/595       |
| GOF on F <sup>2</sup>                   | 1.057                                                                           | 1.035            | 1.048            | 1.049            |
| final R <sub>1</sub> [I > 2σ(I)]        | 0.0224                                                                          | 0.0314           | 0.0330           | 0.0326           |
| final wR <sub>2</sub> [all data]        | 0.0530                                                                          | 0.0861           | 0.0867           | 0.0852           |
| diff. peak and hole / e·Å <sup>-3</sup> | 0.892 and -0.449                                                                | 1.644 and -1.130 | 1.832 and -1.160 | 1.665 and -1.067 |

**Table S3** (continuation) Crystal data and structure refinement parameters for **Re<sub>2</sub>-bpy**.

| compound                                | Re <sub>2</sub> -bpy                                                            |                  |                  |   |
|-----------------------------------------|---------------------------------------------------------------------------------|------------------|------------------|---|
| formula                                 | C <sub>114</sub> H <sub>88</sub> N <sub>12</sub> P <sub>4</sub> Re <sub>2</sub> |                  |                  | – |
| formula weight / g·mol <sup>-1</sup>    | 2122.26                                                                         |                  |                  | – |
| λ / Å                                   | 0.71073 Å (Mo Kα)                                                               |                  |                  | – |
| T / K                                   | 260(2)                                                                          | 280(2)           | 300(2)           | – |
| crystal system                          | monoclinic                                                                      |                  |                  | – |
| space group                             | P 2 <sub>1</sub> /c                                                             |                  |                  | – |
| a / Å                                   | 20.6739(5)                                                                      | 20.6860(6)       | 20.6982(6)       | – |
| b / Å                                   | 13.2990(3)                                                                      | 13.3138(4)       | 13.3255(4)       | – |
| c / Å                                   | 19.8066(5)                                                                      | 19.8227(5)       | 19.8415(6)       | – |
| α / deg                                 | 90                                                                              | 90               | 90               | – |
| β / deg                                 | 116.2490(10)                                                                    | 116.2360(10)     | 116.2270(10)     | – |
| γ / deg                                 | 90                                                                              | 90               | 90               | – |
| V / Å <sup>3</sup>                      | 4884.1(2)                                                                       | 4896.9(2)        | 4909.2(3)        | – |
| Z                                       | 2                                                                               | 2                | 2                | – |
| calcd. density / g·cm <sup>-3</sup>     | 1.443                                                                           | 1.439            | 1.436            | – |
| abs. coeff. / cm <sup>-1</sup>          | 2.598                                                                           | 2.591            | 2.585            | – |
| F(000)                                  | 2132                                                                            | 2132             | 2132             | – |
| θ range / deg                           | 2.445–26.372                                                                    | 2.443–26.372     | 2.561–25.681     | – |
| collected refl.                         | 63864                                                                           | 64611            | 61515            | – |
| R <sub>int</sub>                        | 0.1004                                                                          | 0.1005           | 0.0335           | – |
| completeness / %                        | 99.9                                                                            | 99.9             | 99.9             | – |
| data/restraints/parameters              | 9992/0/595                                                                      | 10020/0/595      | 9312/0/595       | – |
| GOF on F <sup>2</sup>                   | 1.052                                                                           | 1.037            | 1.024            | – |
| final R <sub>1</sub> [I > 2σ(I)]        | 0.0350                                                                          | 0.0347           | 0.0262           | – |
| final wR <sub>2</sub> [all data]        | 0.0900                                                                          | 0.0899           | 0.0602           | – |
| diff. peak and hole / e·Å <sup>-3</sup> | 1.773 and –1.096                                                                | 1.561 and –1.074 | 0.664 and –0.535 | – |

**Table S4** Crystal data and structure refinement parameters for **Re<sub>2</sub>-bpac**.

| compound                                | Re <sub>2</sub> -bpac                                                                           |                  |                  |                  |
|-----------------------------------------|-------------------------------------------------------------------------------------------------|------------------|------------------|------------------|
| formula                                 | C <sub>122</sub> H <sub>112</sub> N <sub>12</sub> O <sub>6</sub> P <sub>4</sub> Re <sub>2</sub> |                  |                  |                  |
| formula weight / g·mol <sup>-1</sup>    | 2338.54                                                                                         |                  |                  |                  |
| $\lambda$ / Å                           | 0.71073 Å (Mo K $\alpha$ )                                                                      |                  |                  |                  |
| $T$ / K                                 | 100(2)                                                                                          | 120(2)           | 140(2)           | 160(2)           |
| crystal system                          | triclinic                                                                                       |                  |                  |                  |
| space group                             | <i>P</i> - 1                                                                                    |                  |                  |                  |
| $a$ / Å                                 | 9.8159(6)                                                                                       | 9.8183(5)        | 9.8295(4)        | 9.8364(4)        |
| $b$ / Å                                 | 12.1799(7)                                                                                      | 12.1928(6)       | 12.2159(5)       | 12.2378(5)       |
| $c$ / Å                                 | 23.1732(14)                                                                                     | 23.1971(12)      | 23.2418(10)      | 23.2792(9)       |
| $\alpha$ / deg                          | 75.457(2)                                                                                       | 75.417(2)        | 75.3890(10)      | 75.3630(10)      |
| $\beta$ / deg                           | 81.048(2)                                                                                       | 80.981(2)        | 80.9260(10)      | 80.9060(10)      |
| $\gamma$ / deg                          | 82.351(2)                                                                                       | 82.349(2)        | 82.3470(10)      | 82.3530(10)      |
| $V$ / Å <sup>3</sup>                    | 2636.2(3)                                                                                       | 2641.5(2)        | 2653.97(19)      | 2664.48(19)      |
| $Z$                                     | 1                                                                                               | 1                | 1                | 1                |
| calcd. density / g·cm <sup>-3</sup>     | 1.473                                                                                           | 1.470            | 1.463            | 1.457            |
| abs. coeff. / cm <sup>-1</sup>          | 2.413                                                                                           | 2.413            | 2.402            | 2.392            |
| $F(000)$                                | 1186                                                                                            | 1186             | 1186             | 1186             |
| $\theta$ range / deg                    | 25.680–25.242                                                                                   | 2.610–25.682     | 2.594–25.680     | 2.602–25.682     |
| collected refl.                         | 43820                                                                                           | 44216            | 44692            | 45092            |
| $R_{\text{int}}$                        | 0.0340                                                                                          | 0.0345           | 0.0350           | 0.0675           |
| completeness / %                        | 99.9                                                                                            | 99.9             | 99.9             | 99.9             |
| data/restraints/parameters              | 9983/0/664                                                                                      | 10006/0/664      | 10046/12/664     | 9983/0/664       |
| GOF on $F^2$                            | 1.018                                                                                           | 1.059            | 1.044            | 1.041            |
| final $R_1$ [ $I > 2\sigma(I)$ ]        | 0.0246                                                                                          | 0.0250           | 0.0253           | 0.0284           |
| final $wR_2$ [all data]                 | 0.0592                                                                                          | 0.0619           | 0.0616           | 0.0700           |
| diff. peak and hole / e·Å <sup>-3</sup> | 1.301 and -0.848                                                                                | 1.146 and -0.796 | 1.286 and -0.735 | 1.197 and -0.948 |

**Table S4** (continuation) Crystal data and structure refinement parameters for **Re<sub>2</sub>-bpac**.

| compound                                | Re <sub>2</sub> -bpac                                                                           |                  |                  |                  |
|-----------------------------------------|-------------------------------------------------------------------------------------------------|------------------|------------------|------------------|
| formula                                 | C <sub>122</sub> H <sub>112</sub> N <sub>12</sub> O <sub>6</sub> P <sub>4</sub> Re <sub>2</sub> |                  |                  |                  |
| formula weight / g·mol <sup>-1</sup>    | 2338.54                                                                                         |                  |                  |                  |
| $\lambda$ / Å                           | 0.71073 Å (Mo K $\alpha$ )                                                                      |                  |                  |                  |
| $T$ / K                                 | 180(2)                                                                                          | 200(2)           | 220(2)           | 240(2)           |
| crystal system                          | triclinic                                                                                       |                  |                  |                  |
| space group                             | $P-1$                                                                                           |                  |                  |                  |
| $a$ / Å                                 | 9.8448(3)                                                                                       | 9.8521(4)        | 9.8583(3)        | 9.8673(3)        |
| $b$ / Å                                 | 12.2621(4)                                                                                      | 12.2847(4)       | 12.3042(4)       | 12.3291(3)       |
| $c$ / Å                                 | 23.3174(7)                                                                                      | 23.3540(8)       | 23.3775(8)       | 23.4052(6)       |
| $\alpha$ / deg                          | 75.3310(10)                                                                                     | 75.3130(10)      | 75.3170(10)      | 75.3490(10)      |
| $\beta$ / deg                           | 80.8720(10)                                                                                     | 80.8710(10)      | 80.9070(10)      | 81.0080(10)      |
| $\gamma$ / deg                          | 82.3340(10)                                                                                     | 82.3200(10)      | 82.3180(10)      | 82.3340(10)      |
| $V$ / Å <sup>3</sup>                    | 2675.76(14)                                                                                     | 2686.61(17)      | 2695.54(15)      | 2707.76(13)      |
| $Z$                                     | 1                                                                                               | 1                | 1                | 1                |
| calcd. density / g·cm <sup>-3</sup>     | 1.451                                                                                           | 1.445            | 1.441            | 1.434            |
| abs. coeff. / cm <sup>-1</sup>          | 2.382                                                                                           | 2.373            | 2.365            | 2.354            |
| $F(000)$                                | 1186                                                                                            | 1186             | 1186             | 1186             |
| $\theta$ range / deg                    | 2.589–25.681                                                                                    | 2.728–25.679     | 2.582–25.681     | 2.578–25.680     |
| collected refl.                         | 45473                                                                                           | 45599            | 45695            | 45995            |
| $R_{\text{int}}$                        | 0.0660                                                                                          | 0.0342           | 0.0669           | 0.0351           |
| completeness / %                        | 99.9                                                                                            | 99.9             | 99.9             | 99.9             |
| data/restraints/parameters              | 10121/0/664                                                                                     | 10149/0/664      | 10188/0/664      | 10121/0/664      |
| GOF on $F^2$                            | 1.042                                                                                           | 1.029            | 1.042            | 1.024            |
| final $R_1$ [ $I > 2\sigma(I)$ ]        | 0.0280                                                                                          | 0.0248           | 0.0295           | 0.0264           |
| final $wR_2$ [all data]                 | 0.0675                                                                                          | 0.0560           | 0.0720           | 0.0605           |
| diff. peak and hole / e·Å <sup>-3</sup> | 1.183 and -0.860                                                                                | 1.064 and -0.629 | 0.951 and -0.960 | 0.853 and -0.538 |

**Table S4** (continuation) Crystal data and structure refinement parameters for **Re<sub>2</sub>-bpac**.

| compound                                | Re <sub>2</sub> -bpac                                                                           |                  |   |
|-----------------------------------------|-------------------------------------------------------------------------------------------------|------------------|---|
| formula                                 | C <sub>122</sub> H <sub>112</sub> N <sub>12</sub> O <sub>6</sub> P <sub>4</sub> Re <sub>2</sub> |                  | - |
| formula weight / g·mol <sup>-1</sup>    | 2338.54                                                                                         |                  | - |
| λ / Å                                   | 0.71073 Å (Mo Kα)                                                                               |                  | - |
| T / K                                   | 260(2)                                                                                          | 280(2)           | - |
| crystal system                          | triclinic                                                                                       |                  | - |
| space group                             | P-1                                                                                             |                  | - |
| a / Å                                   | 9.8745(3)                                                                                       | 9.8936(15)       | - |
| b / Å                                   | 12.3491(3)                                                                                      | 12.3547(19)      | - |
| c / Å                                   | 23.4288(6)                                                                                      | 23.496(4)        | - |
| α / deg                                 | 75.4090(10)                                                                                     | 75.531(5)        | - |
| β / deg                                 | 81.1210(10)                                                                                     | 81.119(5)        | - |
| γ / deg                                 | 82.3270(10)                                                                                     | 82.363(5)        | - |
| V / Å <sup>3</sup>                      | 2718.25(13)                                                                                     | 2734.1(7)        | - |
| Z                                       | 1                                                                                               | 1                | - |
| calcd. density / g·cm <sup>-3</sup>     | 1.429                                                                                           | 1.42             | - |
| abs. coeff. / cm <sup>-1</sup>          | 2.345                                                                                           | 2.331            | - |
| F(000)                                  | 1186                                                                                            | 1186             | - |
| θ range / deg                           | 2.574–25.681                                                                                    | 2.494–25.681     | - |
| collected refl.                         | 46259                                                                                           | 44238            | - |
| R <sub>int</sub>                        | 0.0687                                                                                          | 0.082            | - |
| completeness / %                        | 99.9                                                                                            | 99.9             | - |
| data/restraints/parameters              | 10284/0/664                                                                                     | 10354/1/663      | - |
| GOF on F <sup>2</sup>                   | 1.046                                                                                           | 1.074            | - |
| final R <sub>1</sub> [I > 2σ(I)]        | 0.0325                                                                                          | 0.0457           | - |
| final wR <sub>2</sub> [all data]        | 0.0762                                                                                          | 0.1016           | - |
| diff. peak and hole / e·Å <sup>-3</sup> | 0.772 and -1.007                                                                                | 1.521 and -1.048 | - |

**Table S5** Crystal data and structure refinement parameters for **Re<sub>2</sub>-bpee**.

| compound                                | Re <sub>2</sub> -bpee                                                                           |                  |                  |                  |
|-----------------------------------------|-------------------------------------------------------------------------------------------------|------------------|------------------|------------------|
| formula                                 | C <sub>122</sub> H <sub>114</sub> N <sub>12</sub> O <sub>6</sub> P <sub>4</sub> Re <sub>2</sub> |                  |                  |                  |
| formula weight / g·mol <sup>-1</sup>    | 2340.55                                                                                         |                  |                  |                  |
| $\lambda$ / Å                           | 0.71073 Å (Mo K $\alpha$ )                                                                      |                  |                  |                  |
| $T$ / K                                 | 100(2)                                                                                          | 120(2)           | 140(2)           | 160(2)           |
| crystal system                          | triclinic                                                                                       |                  |                  |                  |
| space group                             | $P-1$                                                                                           |                  |                  |                  |
| $a$ / Å                                 | 9.5573(13)                                                                                      | 9.5712(14)       | 9.5916(13)       | 9.6037(12)       |
| $b$ / Å                                 | 12.3584(17)                                                                                     | 12.3730(18)      | 12.3976(17)      | 12.4099(16)      |
| $c$ / Å                                 | 23.361(3)                                                                                       | 23.380(3)        | 23.419(3)        | 23.422(3)        |
| $\alpha$ / deg                          | 78.872(4)                                                                                       | 78.835(5)        | 78.791(4)        | 78.761(4)        |
| $\beta$ / deg                           | 84.127(5)                                                                                       | 84.098(5)        | 84.065(4)        | 84.006(4)        |
| $\gamma$ / deg                          | 84.293(5)                                                                                       | 84.282(5)        | 84.258(5)        | 84.244(4)        |
| $V$ / Å <sup>3</sup>                    | 2684.1(6)                                                                                       | 2692.9(7)        | 2707.9(6)        | 2713.8(6)        |
| $Z$                                     | 1                                                                                               | 1                | 1                | 1                |
| calcd. density / g·cm <sup>-3</sup>     | 1.448                                                                                           | 1.443            | 1.435            | 1.432            |
| abs. coeff. / cm <sup>-1</sup>          | 2.375                                                                                           | 2.367            | 2.354            | 2.349            |
| $F(000)$                                | 1188                                                                                            | 1188             | 1188             | 1188             |
| $\theta$ range / deg                    | 2.396–25.027                                                                                    | 2.394–25.026     | 2.594–25.028     | 2.388–25.162     |
| collected refl.                         | 43419                                                                                           | 43703            | 44018            | 44388            |
| $R_{\text{int}}$                        | 0.0669                                                                                          | 0.0694           | 0.0723           | 0.0738           |
| completeness / %                        | 99.9                                                                                            | 99.9             | 99.9             | 99.9             |
| data/restraints/parameters              | 9490/18/662                                                                                     | 9517/18/662      | 9569/18/662      | 9706/20/662      |
| GOF on $F^2$                            | 1.069                                                                                           | 1.052            | 1.047            | 1.030            |
| final $R_1$ [ $I > 2\sigma(I)$ ]        | 0.0394                                                                                          | 0.0388           | 0.0403           | 0.0413           |
| final $wR_2$ [all data]                 | 0.0787                                                                                          | 0.0762           | 0.0779           | 0.0801           |
| diff. peak and hole / e·Å <sup>-3</sup> | 1.009 and -1.394                                                                                | 0.948 and -1.221 | 0.864 and -1.231 | 0.867 and -0.918 |



**Table S5** (continuation) Crystal data and structure refinement parameters for **Re<sub>2</sub>-bpee**.

| compound                                | Re <sub>2</sub> -bpee                                                                           |                  |                  |                  |
|-----------------------------------------|-------------------------------------------------------------------------------------------------|------------------|------------------|------------------|
| formula                                 | C <sub>122</sub> H <sub>114</sub> N <sub>12</sub> O <sub>6</sub> P <sub>4</sub> Re <sub>2</sub> |                  |                  |                  |
| formula weight / g·mol <sup>-1</sup>    | 2340.55                                                                                         |                  |                  |                  |
| λ / Å                                   | 0.71073 Å (Mo Kα)                                                                               |                  |                  |                  |
| T / K                                   | 180(2)                                                                                          | 200(2)           | 220(2)           | 240(2)           |
| crystal system                          | triclinic                                                                                       |                  |                  |                  |
| space group                             | P-1                                                                                             |                  |                  |                  |
| a / Å                                   | 9.6152(10)                                                                                      | 9.6328(9)        | 9.6471(6)        | 9.6629(3)        |
| b / Å                                   | 12.4253(13)                                                                                     | 12.4485(12)      | 12.4635(8)       | 12.4880(4)       |
| c / Å                                   | 23.423(2)                                                                                       | 23.435(2)        | 23.4541(14)      | 23.4479(7)       |
| α / deg                                 | 78.727(3)                                                                                       | 78.678(3)        | 78.592(2)        | 78.5560(10)      |
| β / deg                                 | 83.954(4)                                                                                       | 83.875(3)        | 83.817(2)        | 83.8000(10)      |
| γ / deg                                 | 84.253(4)                                                                                       | 84.252(3)        | 84.265(2)        | 84.2540(10)      |
| V / Å <sup>3</sup>                      | 2720.0(5)                                                                                       | 2730.7(4)        | 2739.3(3)        | 2747.99(15)      |
| Z                                       | 1                                                                                               | 1                | 1                | 1                |
| calcd. density / g·cm <sup>-3</sup>     | 1.429                                                                                           | 1.423            | 1.419            | 1.414            |
| abs. coeff. / cm <sup>-1</sup>          | 2.344                                                                                           | 2.334            | 2.327            | 2.320            |
| F(000)                                  | 1188                                                                                            | 1188             | 1188             | 1188             |
| θ range / deg                           | 2.588–25.040                                                                                    | 2.582–25.027     | 2.382–25.026     | 2.574–25.025     |
| collected refl.                         | 44139                                                                                           | 44484            | 44687            | 44744            |
| R <sub>int</sub>                        | 0.0745                                                                                          | 0.0764           | 0.0797           | 0.0816           |
| completeness / %                        | 99.9                                                                                            | 99.9             | 99.9             | 99.9             |
| data/restraints/parameters              | 9607/20/662                                                                                     | 9639/20/662      | 9669/20/662      | 9693/20/662      |
| GOF on F <sup>2</sup>                   | 1.020                                                                                           | 1.007            | 1.007            | 1.005            |
| final R <sub>1</sub> [I > 2σ(I)]        | 0.0419                                                                                          | 0.0422           | 0.0446           | 0.0458           |
| final wR <sub>2</sub> [all data]        | 0.0813                                                                                          | 0.0908           | 0.0947           | 0.0973           |
| diff. peak and hole / e·Å <sup>-3</sup> | 0.811 and -0.997                                                                                | 0.940 and -0.936 | 0.936 and -0.909 | 0.823 and -0.725 |

**Table S5** (continuation) Crystal data and structure refinement parameters for **Re<sub>2</sub>-bpee**.

| compound                                | Re <sub>2</sub> -bpee                                                                           |                  |   |   |
|-----------------------------------------|-------------------------------------------------------------------------------------------------|------------------|---|---|
| formula                                 | C <sub>122</sub> H <sub>114</sub> N <sub>12</sub> O <sub>6</sub> P <sub>4</sub> Re <sub>2</sub> |                  | - | - |
| formula weight / g·mol <sup>-1</sup>    | 2340.55                                                                                         |                  | - | - |
| $\lambda$ / Å                           | 0.71073 Å (Mo K $\alpha$ )                                                                      |                  | - | - |
| $T$ / K                                 | 260(2)                                                                                          | 280(2)           | - | - |
| crystal system                          | triclinic                                                                                       |                  | - | - |
| space group                             | $P-1$                                                                                           |                  | - | - |
| $a$ / Å                                 | 9.6797(3)                                                                                       | 9.6925(3)        | - | - |
| $b$ / Å                                 | 12.5068(4)                                                                                      | 12.5233(4)       | - | - |
| $c$ / Å                                 | 23.4499(7)                                                                                      | 23.4573(7)       | - | - |
| $\alpha$ / deg                          | 78.5340(10)                                                                                     | 78.4650(10)      | - | - |
| $\beta$ / deg                           | 83.7880(10)                                                                                     | 83.7870(10)      | - | - |
| $\gamma$ / deg                          | 84.2650(10)                                                                                     | 84.2340(10)      | - | - |
| $V$ / Å <sup>3</sup>                    | 2756.93(15)                                                                                     | 2764.31(15)      | - | - |
| $Z$                                     | 1                                                                                               | 1                | - | - |
| calcd. density / g·cm <sup>-3</sup>     | 1.410                                                                                           | 1.406            | - | - |
| abs. coeff. / cm <sup>-1</sup>          | 2.312                                                                                           | 2.306            | - | - |
| $F(000)$                                | 1188                                                                                            | 1188             | - | - |
| $\theta$ range / deg                    | 2.570–25.026                                                                                    | 2.566–25.059     | - | - |
| collected refl.                         | 44845                                                                                           | 44949            | - | - |
| $R_{\text{int}}$                        | 0.0853                                                                                          | 0.0540           | - | - |
| completeness / %                        | 99.9                                                                                            | 99.9             | - | - |
| data/restraints/parameters              | 9724/20/662                                                                                     | 9788/20/662      | - | - |
| GOF on $F^2$                            | 1.005                                                                                           | 1.004            | - | - |
| final $R_1$ [ $I > 2\sigma(I)$ ]        | 0.0456                                                                                          | 0.0396           | - | - |
| final $wR_2$ [all data]                 | 0.0966                                                                                          | 0.0884           | - | - |
| diff. peak and hole / e·Å <sup>-3</sup> | 0.843 and -0.949                                                                                | 1.142 and -0.945 | - | - |

**Table S6** Crystal data and structure refinement parameters for **Re<sub>2</sub>-bpen**.

| compound                                | Re <sub>2</sub> -bpen                                                                           |                  |                  |                  |
|-----------------------------------------|-------------------------------------------------------------------------------------------------|------------------|------------------|------------------|
| formula                                 | C <sub>122</sub> H <sub>116</sub> N <sub>12</sub> O <sub>6</sub> P <sub>4</sub> Re <sub>2</sub> |                  |                  |                  |
| formula weight / g·mol <sup>-1</sup>    | 2342.57                                                                                         |                  |                  |                  |
| $\lambda$ / Å                           | 0.71073 Å (Mo K $\alpha$ )                                                                      |                  |                  |                  |
| $T$ / K                                 | 100(2)                                                                                          | 120(2)           | 140(2)           | 160(2)           |
| crystal system                          | triclinic                                                                                       |                  |                  |                  |
| space group                             | $P-1$                                                                                           |                  |                  |                  |
| $a$ / Å                                 | 9.5411(6)                                                                                       | 9.5542(5)        | 9.5678(4)        | 9.5832(4)        |
| $b$ / Å                                 | 12.7965(8)                                                                                      | 12.8117(7)       | 12.8266(5)       | 12.8427(6)       |
| $c$ / Å                                 | 22.1542(13)                                                                                     | 22.1590(11)      | 22.1700(9)       | 22.1842(10)      |
| $\alpha$ / deg                          | 81.158(2)                                                                                       | 81.182(2)        | 81.2230(10)      | 81.257(2)        |
| $\beta$ / deg                           | 84.896(2)                                                                                       | 84.868(2)        | 84.8480(10)      | 84.811(2)        |
| $\gamma$ / deg                          | 88.548(2)                                                                                       | 88.528(2)        | 88.5270(10)      | 88.523(2)        |
| $V$ / Å <sup>3</sup>                    | 2661.9(3)                                                                                       | 2669.4(2)        | 2677.83(19)      | 2687.3(2)        |
| $Z$                                     | 1                                                                                               | 1                | 1                | 1                |
| calcd. density / g·cm <sup>-3</sup>     | 1.461                                                                                           | 1.457            | 1.453            | 1.447            |
| abs. coeff. / cm <sup>-1</sup>          | 2.395                                                                                           | 2.388            | 2.380            | 2.372            |
| $F(000)$                                | 1190                                                                                            | 1190             | 1190             | 1190             |
| $\theta$ range / deg                    | 2.646–25.681                                                                                    | 2.643–25.682     | 2.64–25.68       | 2.655–25.682     |
| collected refl.                         | 45452                                                                                           | 45542            | 45564            | 45728            |
| $R_{\text{int}}$                        | 0.0613                                                                                          | 0.0620           | 0.0621           | 0.0623           |
| completeness / %                        | 99.9                                                                                            | 99.9             | 99.9             | 99.9             |
| data/restraints/parameters              | 10110/38/721                                                                                    | 10138/38/721     | 10163/38/721     | 10195/38/721     |
| GOF on $F^2$                            | 1.059                                                                                           | 1.062            | 1.059            | 1.060            |
| final $R_1$ [ $I > 2\sigma(I)$ ]        | 0.0249                                                                                          | 0.0254           | 0.0264           | 0.0267           |
| final $wR_2$ [all data]                 | 0.0587                                                                                          | 0.0602           | 0.0622           | 0.0643           |
| diff. peak and hole / e·Å <sup>-3</sup> | 0.946 and -0.895                                                                                | 1.166 and -0.851 | 1.382 and -0.747 | 1.549 and -0.785 |

**Table S6** (continuation) Crystal data and structure refinement parameters for **Re<sub>2</sub>-bpen**.

| compound                                | Re <sub>2</sub> -bpen                                                                           |                  |                  |                  |
|-----------------------------------------|-------------------------------------------------------------------------------------------------|------------------|------------------|------------------|
| formula                                 | C <sub>122</sub> H <sub>116</sub> N <sub>12</sub> O <sub>6</sub> P <sub>4</sub> Re <sub>2</sub> |                  |                  |                  |
| formula weight / g·mol <sup>-1</sup>    | 2342.57                                                                                         |                  |                  |                  |
| λ / Å                                   | 0.71073 Å (Mo Kα)                                                                               |                  |                  |                  |
| T / K                                   | 180(2)                                                                                          | 200(2)           | 220(2)           | 240(2)           |
| crystal system                          | triclinic                                                                                       |                  |                  |                  |
| space group                             | P-1                                                                                             |                  |                  |                  |
| a / Å                                   | 9.5974(4)                                                                                       | 9.6163(4)        | 9.6355(3)        | 9.6516(2)        |
| b / Å                                   | 12.8567(5)                                                                                      | 12.8719(6)       | 12.8834(4)       | 12.8920(3)       |
| c / Å                                   | 22.1999(9)                                                                                      | 22.2145(9)       | 22.2248(7)       | 22.2379(5)       |
| α / deg                                 | 81.2830(10)                                                                                     | 81.316(2)        | 81.3450(10)      | 81.3610(10)      |
| β / deg                                 | 84.7490(10)                                                                                     | 84.7100(10)      | 84.6760(10)      | 84.6330(10)      |
| γ / deg                                 | 88.5030(10)                                                                                     | 88.485(2)        | 88.4590(10)      | 88.4360(10)      |
| V / Å <sup>3</sup>                      | 2696.05(19)                                                                                     | 2706.4(2)        | 2715.52(15)      | 2723.39(10)      |
| Z                                       | 1                                                                                               | 1                | 1                | 1                |
| calcd. density / g·cm <sup>-3</sup>     | 1.443                                                                                           | 1.437            | 1.432            | 1.428            |
| abs. coeff. / cm <sup>-1</sup>          | 2.364                                                                                           | 2.355            | 2.347            | 2.341            |
| F(000)                                  | 1190                                                                                            | 1190             | 1190             | 1190             |
| θ range / deg                           | 2.651–25.682                                                                                    | 2.646–25.681     | 2.641–25.681     | 2.65–25.681      |
| collected refl.                         | 45989                                                                                           | 46355            | 46494            | 46576            |
| R <sub>int</sub>                        | 0.0637                                                                                          | 0.0663           | 0.0370           | 0.0374           |
| completeness / %                        | 99.9                                                                                            | 99.9             | 99.9             | 99.9             |
| data/restraints/parameters              | 10234/38/721                                                                                    | 10271/39/721     | 10308/39/721     | 10334/40/721     |
| GOF on F <sup>2</sup>                   | 1.045                                                                                           | 1.001            | 1.024            | 1.042            |
| final R <sub>1</sub> [I > 2σ(I)]        | 0.0272                                                                                          | 0.0279           | 0.0275           | 0.0280           |
| final wR <sub>2</sub> [all data]        | 0.0652                                                                                          | 0.0705           | 0.0664           | 0.0654           |
| diff. peak and hole / e·Å <sup>-3</sup> | 1.427 and -0.872                                                                                | 1.424 and -0.928 | 1.232 and -0.950 | 1.115 and -0.891 |

**Table S6** (continuation) Crystal data and structure refinement parameters for **Re<sub>2</sub>-bpen**.

| compound                                | Re <sub>2</sub> -bpen                                                                           |                  |                  |   |
|-----------------------------------------|-------------------------------------------------------------------------------------------------|------------------|------------------|---|
| formula                                 | C <sub>122</sub> H <sub>116</sub> N <sub>12</sub> O <sub>6</sub> P <sub>4</sub> Re <sub>2</sub> |                  |                  | – |
| formula weight / g·mol <sup>-1</sup>    | 2342.57                                                                                         |                  |                  | – |
| $\lambda$ / Å                           | 0.71073 Å (Mo K $\alpha$ )                                                                      |                  |                  | – |
| $T$ / K                                 | 260(2)                                                                                          | 280(2)           | 300(2)           | – |
| crystal system                          | triclinic                                                                                       |                  |                  | – |
| space group                             | $P - 1$                                                                                         |                  |                  | – |
| $a$ / Å                                 | 9.6709(2)                                                                                       | 9.6841(3)        | 9.7001(15)       | – |
| $b$ / Å                                 | 12.9063(3)                                                                                      | 12.9157(4)       | 12.942(2)        | – |
| $c$ / Å                                 | 22.2598(5)                                                                                      | 22.2669(7)       | 22.274(3)        | – |
| $\alpha$ / deg                          | 81.3760(10)                                                                                     | 81.3760(10)      | 81.412(5)        | – |
| $\beta$ / deg                           | 84.5820(10)                                                                                     | 84.5410(10)      | 84.465(5)        | – |
| $\gamma$ / deg                          | 88.4190(10)                                                                                     | 88.3910(10)      | 88.367(5)        | – |
| $V$ / Å <sup>3</sup>                    | 2734.43(11)                                                                                     | 2740.83(15)      | 2760.4(7)        | – |
| $Z$                                     | 1                                                                                               | 1                | 1                | – |
| calcd. density / g·cm <sup>-3</sup>     | 1.423                                                                                           | 1.419            | 1.409            | – |
| abs. coeff. / cm <sup>-1</sup>          | 2.331                                                                                           | 2.326            | 2.309            | – |
| $F(000)$                                | 1190                                                                                            | 1190             | 1190             | – |
| $\theta$ range / deg                    | 2.623–25.680                                                                                    | 2.622–25.680     | 2.615–25.681     | – |
| collected refl.                         | 46830                                                                                           | 46856            | 47207            | – |
| $R_{\text{int}}$                        | 0.0697                                                                                          | 0.0725           | 0.0426           | – |
| completeness / %                        | 99.9                                                                                            | 99.9             | 99.9             | – |
| data/restraints/parameters              | 10381/40/721                                                                                    | 10401/40/721     | 10481/46/721     | – |
| GOF on $F^2$                            | 1.028                                                                                           | 1.036            | 1.051            | – |
| final $R_1$ [ $I > 2\sigma(I)$ ]        | 0.0309                                                                                          | 0.0319           | 0.0339           | – |
| final $wR_2$ [all data]                 | 0.0740                                                                                          | 0.0750           | 0.0798           | – |
| diff. peak and hole / e·Å <sup>-3</sup> | 1.064 and -0.843                                                                                | 0.992 and -0.768 | 1.465 and -0.652 | – |

**Table S7** Crystal data and structure refinement parameters for **Re<sub>2</sub>-bpb**.

| compound                                | Re <sub>2</sub> -bpb                                                                            |                  |                  |                  |
|-----------------------------------------|-------------------------------------------------------------------------------------------------|------------------|------------------|------------------|
| formula                                 | C <sub>126</sub> H <sub>116</sub> N <sub>12</sub> O <sub>6</sub> P <sub>4</sub> Re <sub>2</sub> |                  |                  |                  |
| formula weight / g·mol <sup>-1</sup>    | 2390.61                                                                                         |                  |                  |                  |
| $\lambda$ / Å                           | 0.71073 Å (Mo K $\alpha$ )                                                                      |                  |                  |                  |
| $T$ / K                                 | 100(2)                                                                                          | 120(2)           | 140(2)           | 160(2)           |
| crystal system                          | triclinic                                                                                       |                  |                  |                  |
| space group                             | $P-1$                                                                                           |                  |                  |                  |
| $a$ / Å                                 | 10.2206(6)                                                                                      | 10.2274(6)       | 10.2379(5)       | 10.2408(5)       |
| $b$ / Å                                 | 12.0308(7)                                                                                      | 12.0459(6)       | 12.0651(6)       | 12.0766(6)       |
| $c$ / Å                                 | 23.5819(13)                                                                                     | 23.6107(12)      | 23.6493(12)      | 23.6717(11)      |
| $\alpha$ / deg                          | 104.141(2)                                                                                      | 104.167(2)       | 104.175(2)       | 104.173(2)       |
| $\beta$ / deg                           | 95.126(2)                                                                                       | 95.123(2)        | 95.136(2)        | 95.174(2)        |
| $\gamma$ / deg                          | 100.697(2)                                                                                      | 100.704(2)       | 100.707(2)       | 100.712(2)       |
| $V$ / Å <sup>3</sup>                    | 2735.2(3)                                                                                       | 2743.4(3)        | 2754.8(2)        | 2760.6(2)        |
| $Z$                                     | 1                                                                                               | 1                | 1                | 1                |
| calcd. density / g·cm <sup>-3</sup>     | 1.451                                                                                           | 1.447            | 1.441            | 1.438            |
| abs. coeff. / cm <sup>-1</sup>          | 2.332                                                                                           | 2.325            | 2.316            | 2.311            |
| $F(000)$                                | 1214                                                                                            | 1214             | 1214             | 1214             |
| $\theta$ range / deg                    | 2.639–25.681                                                                                    | 2.696–25.679     | 2.633–25.681     | 2.631–25.682     |
| collected refl.                         | 45825                                                                                           | 45879            | 46108            | 46363            |
| $R_{\text{int}}$                        | 0.0976                                                                                          | 0.0300           | 0.0303           | 0.0980           |
| completeness / %                        | 99.9                                                                                            | 99.9             | 99.9             | 99.9             |
| data/restraints/parameters              | 10412/0/682                                                                                     | 10429/0/682      | 10458/0/682      | 10412/0/682      |
| GOF on $F^2$                            | 1.071                                                                                           | 1.077            | 1.045            | 1.069            |
| final $R_1$ [ $I > 2\sigma(I)$ ]        | 0.0272                                                                                          | 0.0211           | 0.0221           | 0.0299           |
| final $wR_2$ [all data]                 | 0.069                                                                                           | 0.0495           | 0.0512           | 0.0749           |
| diff. peak and hole / e·Å <sup>-3</sup> | 1.783 and -1.363                                                                                | 1.058 and -0.685 | 1.422 and -0.693 | 2.010 and -1.255 |

**Table S7** (continuation) Crystal data and structure refinement parameters for **Re<sub>2</sub>-bpb**.

| compound                                | Re <sub>2</sub> -bpb                                                                            |                  |                  |                  |
|-----------------------------------------|-------------------------------------------------------------------------------------------------|------------------|------------------|------------------|
| formula                                 | C <sub>126</sub> H <sub>116</sub> N <sub>12</sub> O <sub>6</sub> P <sub>4</sub> Re <sub>2</sub> |                  |                  |                  |
| formula weight / g·mol <sup>-1</sup>    | 2390.61                                                                                         |                  |                  |                  |
| λ / Å                                   | 0.71073 Å (Mo Kα)                                                                               |                  |                  |                  |
| T / K                                   | 180(2)                                                                                          | 200(2)           | 220(2)           | 240(2)           |
| crystal system                          | triclinic                                                                                       |                  |                  |                  |
| space group                             | P-1                                                                                             |                  |                  |                  |
| a / Å                                   | 10.2522(5)                                                                                      | 10.2672(6)       | 10.2841(7)       | 10.3109(5)       |
| b / Å                                   | 12.0974(5)                                                                                      | 12.1191(7)       | 12.1390(7)       | 12.1652(5)       |
| c / Å                                   | 23.6998(10)                                                                                     | 23.7322(13)      | 23.7466(15)      | 23.7605(10)      |
| α / deg                                 | 104.1700(10)                                                                                    | 104.192(2)       | 104.259(2)       | 104.3890(10)     |
| β / deg                                 | 95.193(2)                                                                                       | 95.174(2)        | 95.067(2)        | 94.819(2)        |
| γ / deg                                 | 100.720(2)                                                                                      | 100.752(2)       | 100.800(2)       | 100.873(2)       |
| V / Å <sup>3</sup>                      | 2771.5(2)                                                                                       | 2783.8(3)        | 2794.0(3)        | 2808.1(2)        |
| Z                                       | 1                                                                                               | 1                | 1                | 1                |
| calcd. density / g·cm <sup>-3</sup>     | 1.432                                                                                           | 1.426            | 1.421            | 1.414            |
| abs. coeff. / cm <sup>-1</sup>          | 2.302                                                                                           | 2.292            | 2.283            | 2.272            |
| F(000)                                  | 1214                                                                                            | 1214             | 1214             | 1214             |
| θ range / deg                           | 2.627–25.682                                                                                    | 2.683–25.681     | 2.682–25.681     | 2.387–25.682     |
| collected refl.                         | 46542                                                                                           | 46664            | 46995            | 47705            |
| R <sub>int</sub>                        | 0.0964                                                                                          | 0.0326           | 0.0998           | 0.1005           |
| completeness / %                        | 99.9                                                                                            | 99.9             | 99.9             | 99.9             |
| data/restraints/parameters              | 10534/0/682                                                                                     | 10573/0/682      | 10610/12/677     | 10534/0/682      |
| GOF on F <sup>2</sup>                   | 1.071                                                                                           | 1.053            | 1.074            | 1.097            |
| final R <sub>1</sub> [I > 2σ(I)]        | 0.0308                                                                                          | 0.0257           | 0.0327           | 0.0346           |
| final wR <sub>2</sub> [all data]        | 0.0766                                                                                          | 0.0612           | 0.0835           | 0.0871           |
| diff. peak and hole / e·Å <sup>-3</sup> | 1.808 and -1.115                                                                                | 1.462 and -0.720 | 1.672 and -0.962 | 1.368 and -1.037 |

**Table S7** (continuation) Crystal data and structure refinement parameters for **Re<sub>2</sub>-bpb**.

| compound                                                 | Re <sub>2</sub> -bpb                                                                            |   |   |   |
|----------------------------------------------------------|-------------------------------------------------------------------------------------------------|---|---|---|
| formula                                                  | C <sub>126</sub> H <sub>116</sub> N <sub>12</sub> O <sub>6</sub> P <sub>4</sub> Re <sub>2</sub> | - | - | - |
| formula weight / g·mol <sup>-1</sup>                     | 2390.61                                                                                         | - | - | - |
| λ / Å                                                    | 0.71073 Å (Mo Kα)                                                                               | - | - | - |
| T / K                                                    | 260(2)                                                                                          | - | - | - |
| crystal system                                           | triclinic                                                                                       | - | - | - |
| space group                                              | <i>P</i> -1                                                                                     | - | - | - |
| <i>a</i> / Å                                             | 10.3477(4)                                                                                      | - | - | - |
| <i>b</i> / Å                                             | 12.1984(4)                                                                                      | - | - | - |
| <i>c</i> / Å                                             | 23.7456(9)                                                                                      | - | - | - |
| α / deg                                                  | 104.6500(10)                                                                                    | - | - | - |
| β / deg                                                  | 94.3200(10)                                                                                     | - | - | - |
| γ / deg                                                  | 101.0150(10)                                                                                    | - | - | - |
| <i>V</i> / Å <sup>3</sup>                                | 2822.20(18)                                                                                     | - | - | - |
| <i>Z</i>                                                 | 1                                                                                               | - | - | - |
| calcd. density / g·cm <sup>-3</sup>                      | 1.407                                                                                           | - | - | - |
| abs. coeff. / cm <sup>-1</sup>                           | 2.260                                                                                           | - | - | - |
| <i>F</i> (000)                                           | 1214                                                                                            | - | - | - |
| θ range / deg                                            | 2.519–25.682                                                                                    | - | - | - |
| collected refl.                                          | 48275                                                                                           | - | - | - |
| <i>R</i> <sub>int</sub>                                  | 0.1065                                                                                          | - | - | - |
| completeness / %                                         | 99.9                                                                                            | - | - | - |
| data/restraints/parameters                               | 10717/12/682                                                                                    | - | - | - |
| GOF on <i>F</i> <sup>2</sup>                             | 1.111                                                                                           | - | - | - |
| final <i>R</i> <sub>1</sub> [ <i>I</i> > 2σ( <i>I</i> )] | 0.0382                                                                                          | - | - | - |
| final <i>wR</i> <sub>2</sub> [all data]                  | 0.0978                                                                                          | - | - | - |
| diff. peak and hole / e·Å <sup>-3</sup>                  | 1.309 and -1.150                                                                                | - | - | - |



**Table S8** Crystal data and structure refinement parameters for **Re<sub>2</sub>-bpbp**.

| compound                                | Re <sub>2</sub> -bpbp                                                                           |                  |                  |                  |
|-----------------------------------------|-------------------------------------------------------------------------------------------------|------------------|------------------|------------------|
| formula                                 | C <sub>132</sub> H <sub>120</sub> N <sub>12</sub> O <sub>6</sub> P <sub>4</sub> Re <sub>2</sub> |                  |                  |                  |
| formula weight / g·mol <sup>-1</sup>    | 2466.70                                                                                         |                  |                  |                  |
| $\lambda$ / Å                           | 0.71073 Å (Mo K $\alpha$ )                                                                      |                  |                  |                  |
| $T$ / K                                 | 100(2)                                                                                          | 120(2)           | 140(2)           | 160(2)           |
| crystal system                          | monoclinic                                                                                      |                  |                  |                  |
| space group                             | $P 2_1/n$                                                                                       |                  |                  |                  |
| $a$ / Å                                 | 15.8830(4)                                                                                      | 15.8877(5)       | 15.8949(5)       | 15.9045(6)       |
| $b$ / Å                                 | 22.6871(5)                                                                                      | 22.7119(7)       | 22.7378(8)       | 22.7639(9)       |
| $c$ / Å                                 | 16.5837(3)                                                                                      | 16.6046(5)       | 16.6277(6)       | 16.6543(6)       |
| $\alpha$ / deg                          | 90                                                                                              | 90               | 90               | 90               |
| $\beta$ / deg                           | 106.2840(10)                                                                                    | 106.2900(10)     | 106.3070(10)     | 106.3160(10)     |
| $\gamma$ / deg                          | 90                                                                                              | 90               | 90               | 90               |
| $V$ / Å <sup>3</sup>                    | 5736.0(2)                                                                                       | 5751.1(3)        | 5767.7(3)        | 5786.8(4)        |
| $Z$                                     | 2                                                                                               | 2                | 2                | 2                |
| calcd. density / g·cm <sup>-3</sup>     | 1.428                                                                                           | 1.424            | 1.420            | 1.416            |
| abs. coeff. / cm <sup>-1</sup>          | 2.227                                                                                           | 2.221            | 2.214            | 2.207            |
| $F(000)$                                | 2508                                                                                            | 2508             | 2508             | 2508             |
| $\theta$ range / deg                    | 2.238–25.682                                                                                    | 2.236–25.681     | 2.234–25.348     | 2.232–25.681     |
| collected refl.                         | 44976                                                                                           | 72826            | 71449            | 73443            |
| $R_{\text{int}}$                        | 0.0568                                                                                          | 0.0621           | 0.0839           | 0.0648           |
| completeness / %                        | 99.9                                                                                            | 99.9             | 99.9             | 99.9             |
| data/restraints/parameters              | 10889/56/775                                                                                    | 10923/56/775     | 10550/56/775     | 10992/56/775     |
| GOF on $F^2$                            | 1.027                                                                                           | 1.022            | 1.035            | 1.013            |
| final $R_1$ [ $I > 2\sigma(I)$ ]        | 0.0388                                                                                          | 0.0363           | 0.0377           | 0.0372           |
| final $wR_2$ [all data]                 | 0.0836                                                                                          | 0.0827           | 0.0908           | 0.0897           |
| diff. peak and hole / e·Å <sup>-3</sup> | 1.552 and -0.890                                                                                | 1.721 and -1.055 | 1.832 and -1.008 | 1.504 and -0.940 |

**Table S8** (continuation) Crystal data and structure refinement parameters for **Re<sub>2</sub>-bpbp**.

| compound                                | Re <sub>2</sub> -bpbp                                                                           |                  |                  |                  |
|-----------------------------------------|-------------------------------------------------------------------------------------------------|------------------|------------------|------------------|
| formula                                 | C <sub>132</sub> H <sub>120</sub> N <sub>12</sub> O <sub>6</sub> P <sub>4</sub> Re <sub>2</sub> |                  |                  |                  |
| formula weight / g·mol <sup>-1</sup>    | 2466.70                                                                                         |                  |                  |                  |
| $\lambda$ / Å                           | 0.71073 Å (Mo K $\alpha$ )                                                                      |                  |                  |                  |
| $T$ / K                                 | 180(2)                                                                                          | 200(2)           | 220(2)           | 240(2)           |
| crystal system                          | monoclinic                                                                                      |                  |                  |                  |
| space group                             | $P 2_1/n$                                                                                       |                  |                  |                  |
| $a$ / Å                                 | 15.9113(6)                                                                                      | 15.9127(6)       | 15.9162(7)       | 15.9273(5)       |
| $b$ / Å                                 | 22.7979(8)                                                                                      | 22.8416(9)       | 22.8778(10)      | 22.9042(7)       |
| $c$ / Å                                 | 16.6789(6)                                                                                      | 16.7080(7)       | 16.7402(7)       | 16.7886(5)       |
| $\alpha$ / deg                          | 90                                                                                              | 90               | 90               | 90               |
| $\beta$ / deg                           | 106.3680(10)                                                                                    | 106.4460(10)     | 106.4790(10)     | 106.4630(10)     |
| $\gamma$ / deg                          | 90                                                                                              | 90               | 90               | 90               |
| $V$ / Å <sup>3</sup>                    | 5805.0(4)                                                                                       | 5824.4(4)        | 5845.2(4)        | 5873.4(3)        |
| $Z$                                     | 2                                                                                               | 2                | 2                | 2                |
| calcd. density / g·cm <sup>-3</sup>     | 1.411                                                                                           | 1.406            | 1.401            | 1.395            |
| abs. coeff. / cm <sup>-1</sup>          | 2.200                                                                                           | 2.193            | 2.185            | 2.175            |
| $F(000)$                                | 2508                                                                                            | 2508             | 2508             | 2508             |
| $\theta$ range / deg                    | 2.230–25.681                                                                                    | 2.542–25.681     | 2.538–25.681     | 2.223–25.682     |
| collected refl.                         | 73721                                                                                           | 74173            | 74402            | 74610            |
| $R_{\text{int}}$                        | 0.0646                                                                                          | 0.0884           | 0.0686           | 0.0718           |
| completeness / %                        | 99.9                                                                                            | 99.9             | 99.9             | 99.9             |
| data/restraints/parameters              | 11023/57/775                                                                                    | 11052/57/775     | 11092/63/775     | 11142/63/775     |
| GOF on $F^2$                            | 1.022                                                                                           | 1.034            | 1.018            | 1.004            |
| final $R_1$ [ $I > 2\sigma(I)$ ]        | 0.0380                                                                                          | 0.0395           | 0.0399           | 0.0411           |
| final $wR_2$ [all data]                 | 0.0874                                                                                          | 0.0945           | 0.0917           | 0.0949           |
| diff. peak and hole / e·Å <sup>-3</sup> | 1.439 and -0.997                                                                                | 1.355 and -0.985 | 1.251 and -1.011 | 1.062 and -0.802 |

**Table S8** (continuation) Crystal data and structure refinement parameters for **Re<sub>2</sub>-bpbp**.

| compound                                | Re <sub>2</sub> -bpbp                                                                           |                  |                  |   |
|-----------------------------------------|-------------------------------------------------------------------------------------------------|------------------|------------------|---|
| formula                                 | C <sub>132</sub> H <sub>120</sub> N <sub>12</sub> O <sub>6</sub> P <sub>4</sub> Re <sub>2</sub> |                  |                  | – |
| formula weight / g·mol <sup>-1</sup>    | 2466.70                                                                                         |                  |                  | – |
| λ / Å                                   | 0.71073 Å (Mo Kα)                                                                               |                  |                  | – |
| T / K                                   | 260(2)                                                                                          | 280(2)           | 300(2)           | – |
| crystal system                          | monoclinic                                                                                      |                  |                  | – |
| space group                             | P 2 <sub>1</sub> /n                                                                             |                  |                  | – |
| a / Å                                   | 15.9295(4)                                                                                      | 15.9303(4)       | 15.9312(14)      | – |
| b / Å                                   | 22.9427(6)                                                                                      | 22.9953(6)       | 23.045(2)        | – |
| c / Å                                   | 16.8395(4)                                                                                      | 16.8945(4)       | 16.9521(15)      | – |
| α / deg                                 | 90                                                                                              | 90               | 90               | – |
| β / deg                                 | 106.5070(10)                                                                                    | 106.5930(10)     | 106.691(3)       | – |
| γ / deg                                 | 90                                                                                              | 90               | 90               | – |
| V / Å <sup>3</sup>                      | 5900.6(3)                                                                                       | 5931.1(3)        | 5958.0(9)        | – |
| Z                                       | 2                                                                                               | 2                | 2                | – |
| calcd. density / g·cm <sup>-3</sup>     | 1.388                                                                                           | 1.381            | 1.375            | – |
| abs. coeff. / cm <sup>-1</sup>          | 2.165                                                                                           | 2.153            | 2.144            | – |
| F(000)                                  | 2508                                                                                            | 2508             | 2508             | – |
| θ range / deg                           | 2.220–25.682                                                                                    | 2.516–26.371     | 2.509–25.681     | – |
| collected refl.                         | 75030                                                                                           | 79347            | 75496            | – |
| R <sub>int</sub>                        | 0.0953                                                                                          | 0.0826           | 0.1048           | – |
| completeness / %                        | 99.9                                                                                            | 99.9             | 99.9             | – |
| data/restraints/parameters              | 11189/63/775                                                                                    | 12114/63/775     | 11293/92/775     | – |
| GOF on F <sup>2</sup>                   | 1.017                                                                                           | 1.013            | 1.006            | – |
| final R <sub>1</sub> [I > 2σ(I)]        | 0.0429                                                                                          | 0.046            | 0.0499           | – |
| final wR <sub>2</sub> [all data]        | 0.1044                                                                                          | 0.1081           | 0.1238           | – |
| diff. peak and hole / e·Å <sup>-3</sup> | 0.893 and -0.842                                                                                | 0.888 and -0.782 | 0.949 and -0.827 | – |

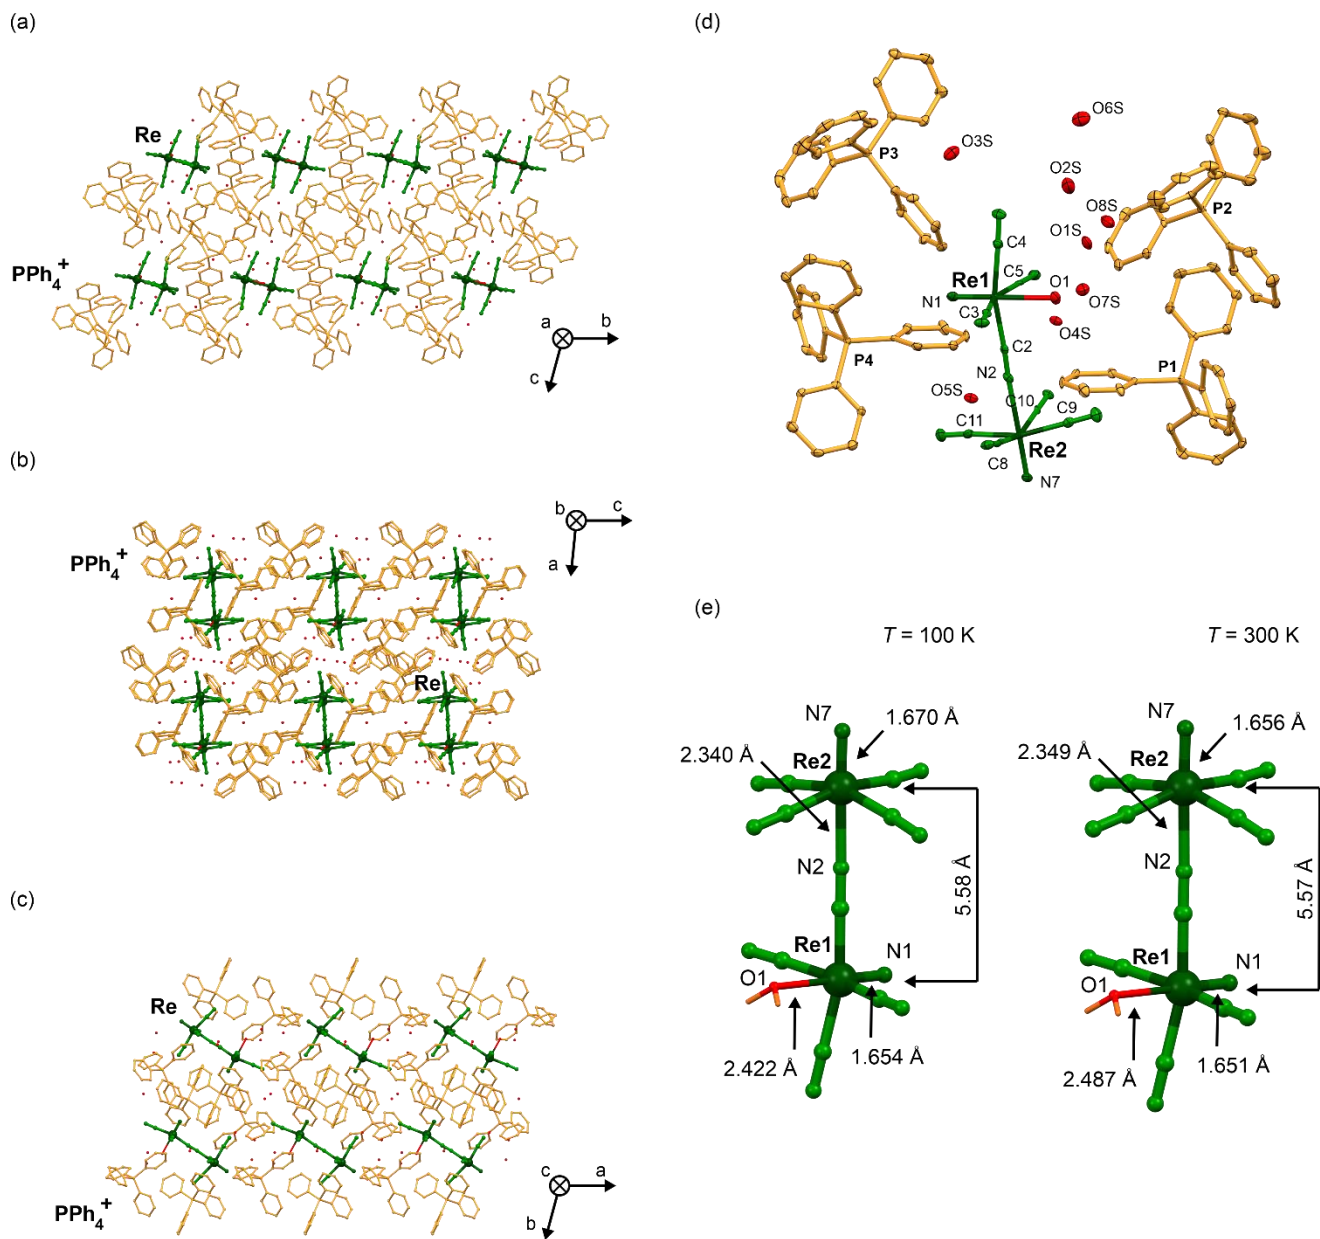

**Fig. S3** Detailed structural views of **Re<sub>2</sub>-CN** material: the crystal structure presented along the main *a*, *b*, and *c* crystallographic axes (*a*, *b*, and *c*, respectively), the asymmetric unit with the labeling scheme for selected symmetrically independent atoms (*d*), and the comparison of the metric parameters of bimetallic {Re<sup>V</sup><sub>2</sub>}<sup>4-</sup> assemblies at 100(2) and 300(2) K (*e*). Thermal ellipsoids for the asymmetric unit in (*d*) are presented at the 50% probability level. Hydrogen atoms in the (*a*-*d*) parts views were omitted for clarity. Related detailed structural parameters are presented in Table S9.

**Table S9** Detailed crystal structure parameters of **Re<sub>2</sub>-CN**.

| compound                            | Re <sub>2</sub> -CN    |                        |                        |                        |                        |                        |
|-------------------------------------|------------------------|------------------------|------------------------|------------------------|------------------------|------------------------|
|                                     | T / K                  | 100(2)                 | 120(2)                 | 140(2)                 | 160(2)                 | 180(2)                 |
| Re1/Re2-C / Å                       | 2.092(5) – 2.109(5)    | 2.094(5) – 2.115(5)    | 2.094(5) – 2.116(5)    | 2.093(5) – 2.119(5)    | 2.098(5) – 2.112(5)    | 2.090(5) – 2.114(5)    |
| Re1≡N1 / Å                          | 1.654(4)               | 1.653(4)               | 1.657(4)               | 1.654(4)               | 1.651(4)               | 1.653(4)               |
| Re1-O1 / Å                          | 2.422(3)               | 2.420(3)               | 2.424(3)               | 2.426(3)               | 2.426(3)               | 2.428(4)               |
| Re2≡N7 / Å                          | 1.670(4)               | 1.668(4)               | 1.665(4)               | 1.667(4)               | 1.665(4)               | 1.664(4)               |
| Re1-N2 / Å                          | 2.340(4)               | 2.343(4)               | 2.344(4)               | 2.347(4)               | 2.350(4)               | 2.348(4)               |
| C-Re1/Re2-C<br>( <i>cis</i> ) / °   | 85.43(16) – 91.31(17)  | 85.18(17) – 91.37(18)  | 85.07(17) – 91.49(17)  | 85.27(17) – 91.39(18)  | 85.38(17) – 91.15(18)  | 85.40(19) – 91.02(19)  |
| C-Re1/Re2-C<br>( <i>trans</i> ) / ° | 159.85(17), 165.85(17) | 159.94(18), 165.94(18) | 160.03(17), 166.01(18) | 160.09(17), 166.04(18) | 159.69(18), 165.88(18) | 159.54(18), 165.71(19) |
| N1≡Re1-C / °                        | 96.19(18) – 99.99(17)  | 96.23(18) – 100.11(18) | 96.35(18) – 99.99(18)  | 96.43(18) – 99.95(18)  | 95.90(19) – 100.89(18) | 96.77(19) – 100.1(2)   |
| N1≡Re1-O1 / °                       | 179.70(15)             | 179.69(15)             | 179.51(16)             | 179.60(16)             | 179.22(16)             | 179.52(17)             |
| N7≡Re2-C / °                        | 95.70(18) – 101.09(17) | 95.93(19) – 101.08(18) | 95.90(18) – 101.03(18) | 96.07(19) – 101.03(18) | 96.82(19) – 99.94(19)  | 96.3(2) – 101.07(19)   |
| N7≡Re1-N2 / °                       | 176.99(15)             | 177.22(16)             | 177.10(16)             | 177.08(16)             | 177.44(16)             | 177.20(17)             |
| Re1-(L)-Re1 / Å                     | 5.583(7)               | 5.585(7)               | 5.588(7)               | 5.589(7)               | 5.592(8)               | 5.591(8)               |
| T / K                               | 220(2)                 | 240(2)                 | 260(2)                 | 280(2)                 | 300(2)                 | –                      |
| Re1/Re2-C / Å                       | 2.095(5) – 2.107(5)    | 2.084(6) – 2.116(6)    | 2.089(6) – 2.121(6)    | 2.092(7) – 2.116(7)    | 2.085(9) – 2.120(9)    | –                      |
| Re1≡N1 / Å                          | 1.653(4)               | 1.657(4)               | 1.649(5)               | 1.647(5)               | 1.651(6)               | –                      |
| Re1-O1 / Å                          | 2.438(4)               | 2.437(4)               | 2.445(4)               | 2.453(5)               | 2.487(6)               | –                      |
| Re2≡N7 / Å                          | 1.658(4)               | 1.664(4)               | 1.657(5)               | 1.652(5)               | 1.656(6)               | –                      |
| Re1-N2 / Å                          | 2.346(4)               | 2.349(4)               | 2.351(5)               | 2.349(5)               | 2.349(7)               | –                      |
| C-Re1/Re2-C<br>( <i>cis</i> ) / °   | 85.51(19) – 90.72(19)  | 85.4(2) – 90.9(2)      | 85.4(2) – 90.6(2)      | 85.5(2) – 90.4(2)      | 85.5(3) – 90.5(3)      | –                      |
| C-Re1/Re2-C<br>( <i>trans</i> ) / ° | 160.11(19), 165.8(2)   | 160.4(2), 165.7(2)     | 160.1(2), 165.5(2)     | 160.0(2), 165.6(3)     | 160.2(3), 165.0(4)     | –                      |
| N1≡Re1-C / °                        | 96.9(2) – 100.1(2)     | 96.8(2) – 100.0(2)     | 96.9(2) – 100.0(2)     | 96.8(3) – 100.4(3)     | 96.4(4) – 100.6(3)     | –                      |
| N1≡Re1-O1 / °                       | 179.58(18)             | 179.37(19)             | 178.6(2)               | 179.2(2)               | 179.8(3)               | –                      |
| N7≡Re2-C / °                        | 96.4(2) – 100.9(2)     | 96.6(2) – 100.7(2)     | 96.5(2) – 100.7(2)     | 97.1(3) – 100.8(3)     | 97.5(4) – 100.4(3)     | –                      |
| N7≡Re1-N2 / °                       | 177.33(17)             | 177.46(18)             | 177.5(2)               | 177.6(2)               | 177.1(3)               | –                      |
| Re1-(L)-Re1 / Å                     | 5.590(8)               | 5.589(9)               | 5.585(10)              | 5.58(11)               | 5.566(14)              | –                      |

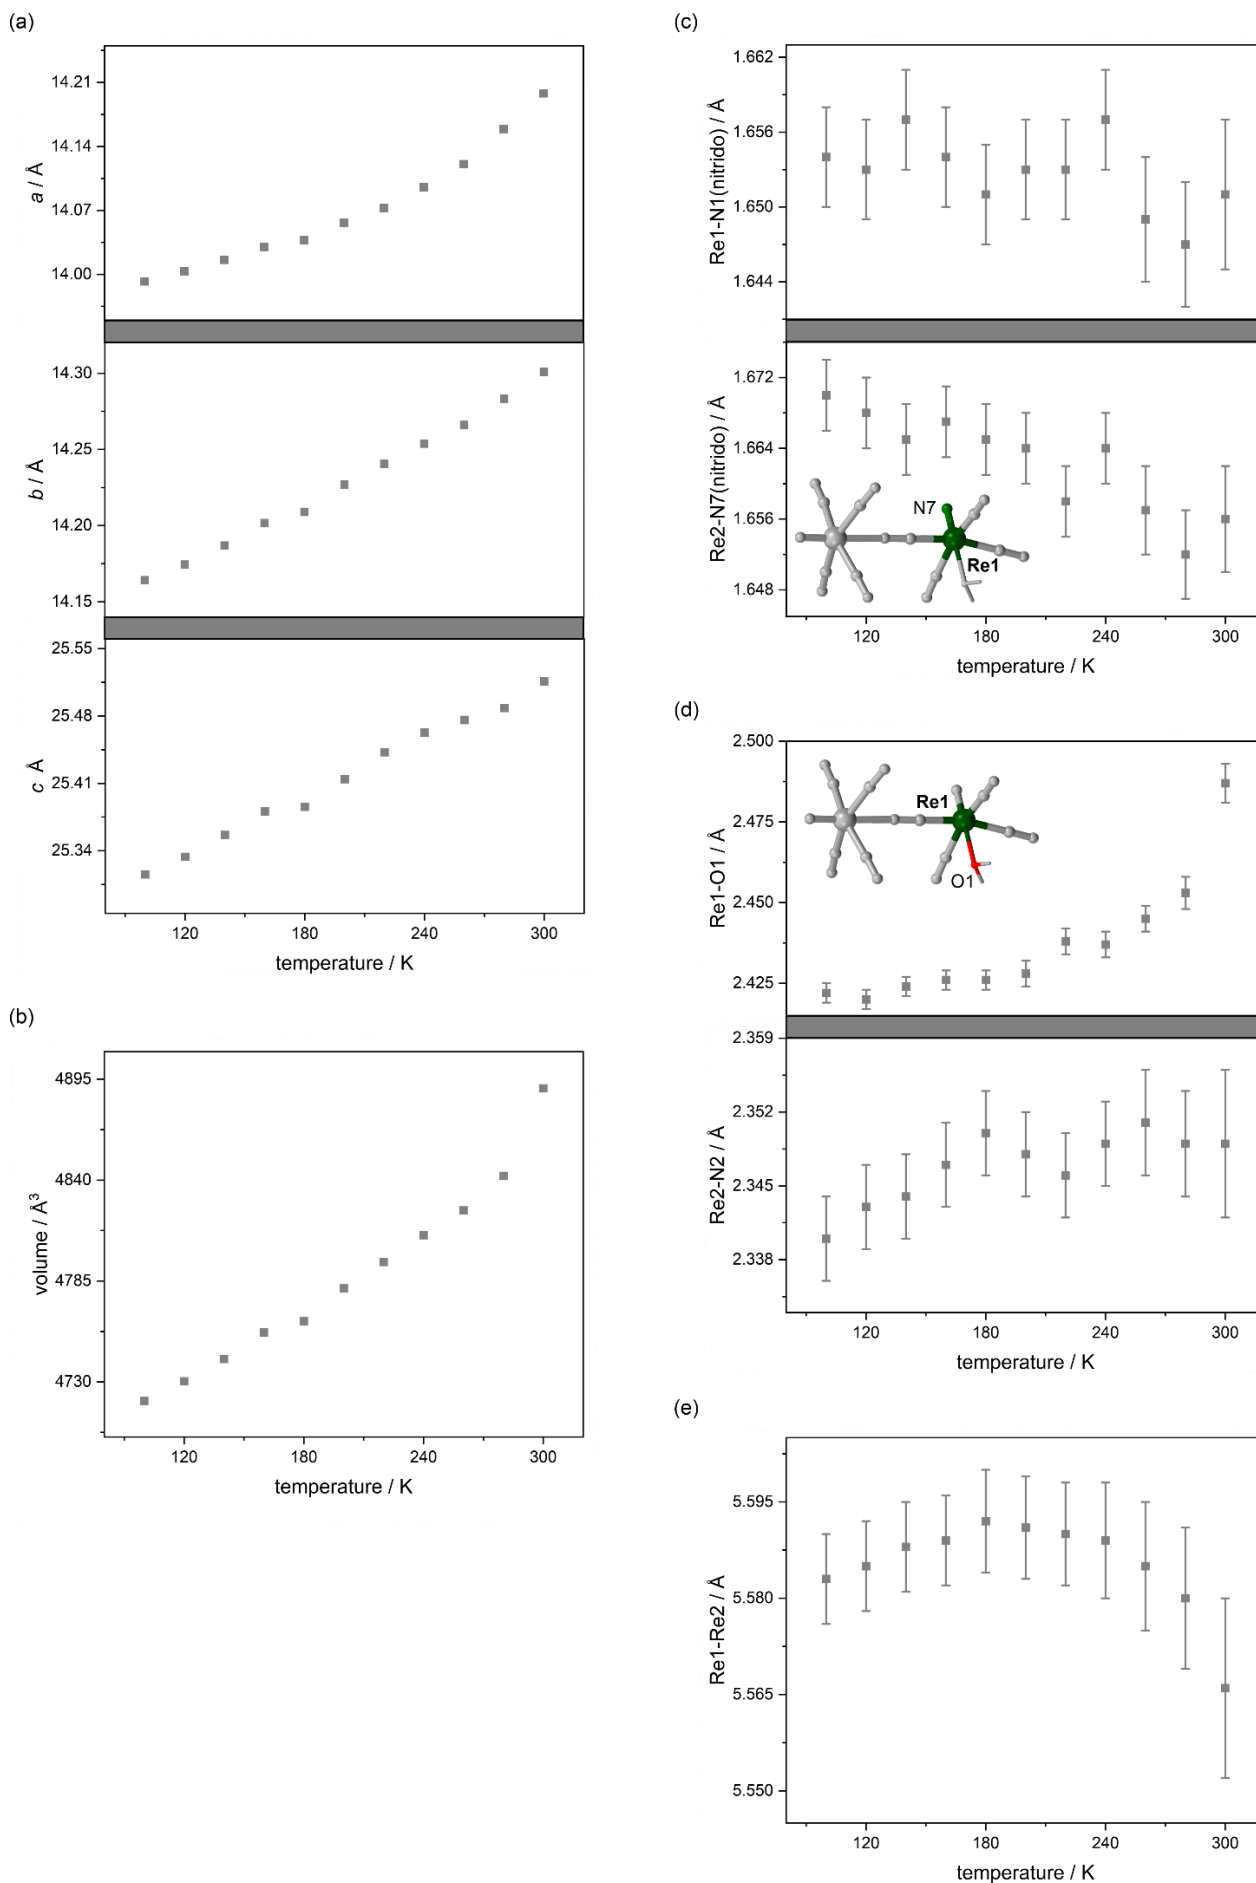

**Fig. S4** The temperature variation of unit cell parameters (a–b), as well as Re≡N(nitrido), Re–O1, Re–N2, and Re–Re bond lengths (c–e) within the bimetallic  $\{\text{Re}_2\}^{4-}$  assemblies in the crystal structure of  $\text{Re}_2\text{-CN}$ .



**Table S10** Detailed crystal structure parameters of **Re<sub>2</sub>-en**.

| compound                   | Re <sub>2</sub> -en    |                        |                        |                        |                        |                        |
|----------------------------|------------------------|------------------------|------------------------|------------------------|------------------------|------------------------|
|                            | T / K                  | 100(2)                 | 120(2)                 | 140(2)                 | 160(2)                 | 180(2)                 |
| Re1/Re2-C / Å              | 2.097(4) – 2.117(4)    | 2.094(4) – 2.117(4)    | 2.096(4) – 2.114(4)    | 2.097(4) – 2.115(4)    | 2.097(4) – 2.116(4)    | 2.095(5) – 2.126(5)    |
| Re1≡N1 / Å                 | 1.667(3)               | 1.666(3)               | 1.665(3)               | 1.666(3)               | 1.667(3)               | 1.658(4)               |
| Re1-N6 / Å                 | 2.521(3)               | 2.520(3)               | 2.523(3)               | 2.526(3)               | 2.525(3)               | 2.523(4)               |
| Re2≡N7 / Å                 | 1.667(3)               | 1.666(3)               | 1.668(3)               | 1.666(3)               | 1.665(3)               | 1.654(4)               |
| Re1-N12 / Å                | 2.501(3)               | 2.501(3)               | 2.501(3)               | 2.505(3)               | 2.506(3)               | 2.501(4)               |
| C-Re1/Re2-C<br>(cis) / °   | 85.89(13) – 91.56(13)  | 85.89(13) – 91.54(13)  | 86.01(13) – 91.57(14)  | 86.03(13) – 91.45(14)  | 86.16(13) – 91.39(14)  | 85.92(17) – 91.48(18)  |
| C-Re1/Re2-C<br>(trans) / ° | 158.80(13), 163.38(13) | 158.81(13), 163.36(13) | 158.76(13), 163.34(13) | 158.73(13), 163.27(13) | 158.86(13), 163.13(13) | 158.76(18), 163.02(18) |
| N1≡Re1-C / °               | 99.09(14) – 100.81(14) | 99.12(14) – 100.90(14) | 99.05(14) – 100.92(14) | 99.07(14) – 100.96(14) | 99.18(15) – 100.92(15) | 99.0(2) – 101.0(2)     |
| N1≡Re1-N6 / °              | 176.83(12)             | 176.86(12)             | 176.83(13)             | 176.86(13)             | 176.90(13)             | 177.11(17)             |
| N7≡Re2-C / °               | 97.50(14) – 101.37(14) | 97.52(14) – 101.38(14) | 97.49(14) – 101.52(14) | 97.58(14) – 101.48(14) | 97.67(15) – 101.40(14) | 97.9(2) – 101.37(19)   |
| N7≡Re1-N12 / °             | 176.13(13)             | 176.18(13)             | 176.15(13)             | 176.17(13)             | 176.34(13)             | 176.51(18)             |
| Re1-(L)-Re1 / Å            | 8.014(6)               | 8.014(6)               | 8.019(6)               | 8.027(6)               | 8.032(6)               | 8.038(8)               |
| T / K                      | 220(2)                 | 240(2)                 | 260(2)                 | 280(2)                 | 300(2)                 | –                      |
| Re1/Re2-C / Å              | 2.100(4) – 2.116(4)    | 2.094(4) – 2.113(4)    | 2.097(4) – 2.116(4)    | 2.095(4) – 2.119(4)    | 2.094(5) – 2.113(5)    | –                      |
| Re1≡N1 / Å                 | 1.662(3)               | 1.663(3)               | 1.658(3)               | 1.659(3)               | 1.657(3)               | –                      |
| Re1-N6 / Å                 | 2.525(3)               | 2.530(3)               | 2.531(3)               | 2.531(3)               | 2.533(3)               | –                      |
| Re2≡N7 / Å                 | 1.663(3)               | 1.666(3)               | 1.662(3)               | 1.661(3)               | 1.657(3)               | –                      |
| Re1-N12 / Å                | 2.506(3)               | 2.509(3)               | 2.510(3)               | 2.512(3)               | 2.509(3)               | –                      |
| C-Re1/Re2-C<br>(cis) / °   | 86.14(14) – 91.33(15)  | 86.19(13) – 91.18(15)  | 86.48(14) – 91.15(16)  | 86.48(15) – 91.03(16)  | 86.34(16) – 90.96(17)  | –                      |
| C-Re1/Re2-C<br>(trans) / ° | 158.64(14), 163.16(14) | 158.75(14), 163.09(14) | 158.77(15), 163.16(15) | 158.65(15), 163.09(15) | 158.69(16), 163.16(16) | –                      |
| N1≡Re1-C / °               | 99.12(16) – 100.93(16) | 99.15(15) – 100.86(15) | 99.20(17) – 100.78(17) | 99.10(17) – 100.93(16) | 99.10(18) – 100.95(17) | –                      |
| N1≡Re1-N6 / °              | 176.89(14)             | 176.81(14)             | 176.81(15)             | 176.90(15)             | 176.82(16)             | –                      |
| N7≡Re2-C / °               | 97.84(15) – 101.48(15) | 97.74(15) – 101.55(15) | 97.79(16) – 101.37(16) | 97.87(17) – 101.51(16) | 97.84(18) – 101.41(17) | –                      |
| N7≡Re1-N12 / °             | 176.44(14)             | 176.41(14)             | 176.58(15)             | 176.61(16)             | 176.81(17)             | –                      |
| Re1-(L)-Re1 / Å            | 8.044(6)               | 8.05(6)                | 8.057(7)               | 8.068(7)               | 8.068(8)               | –                      |



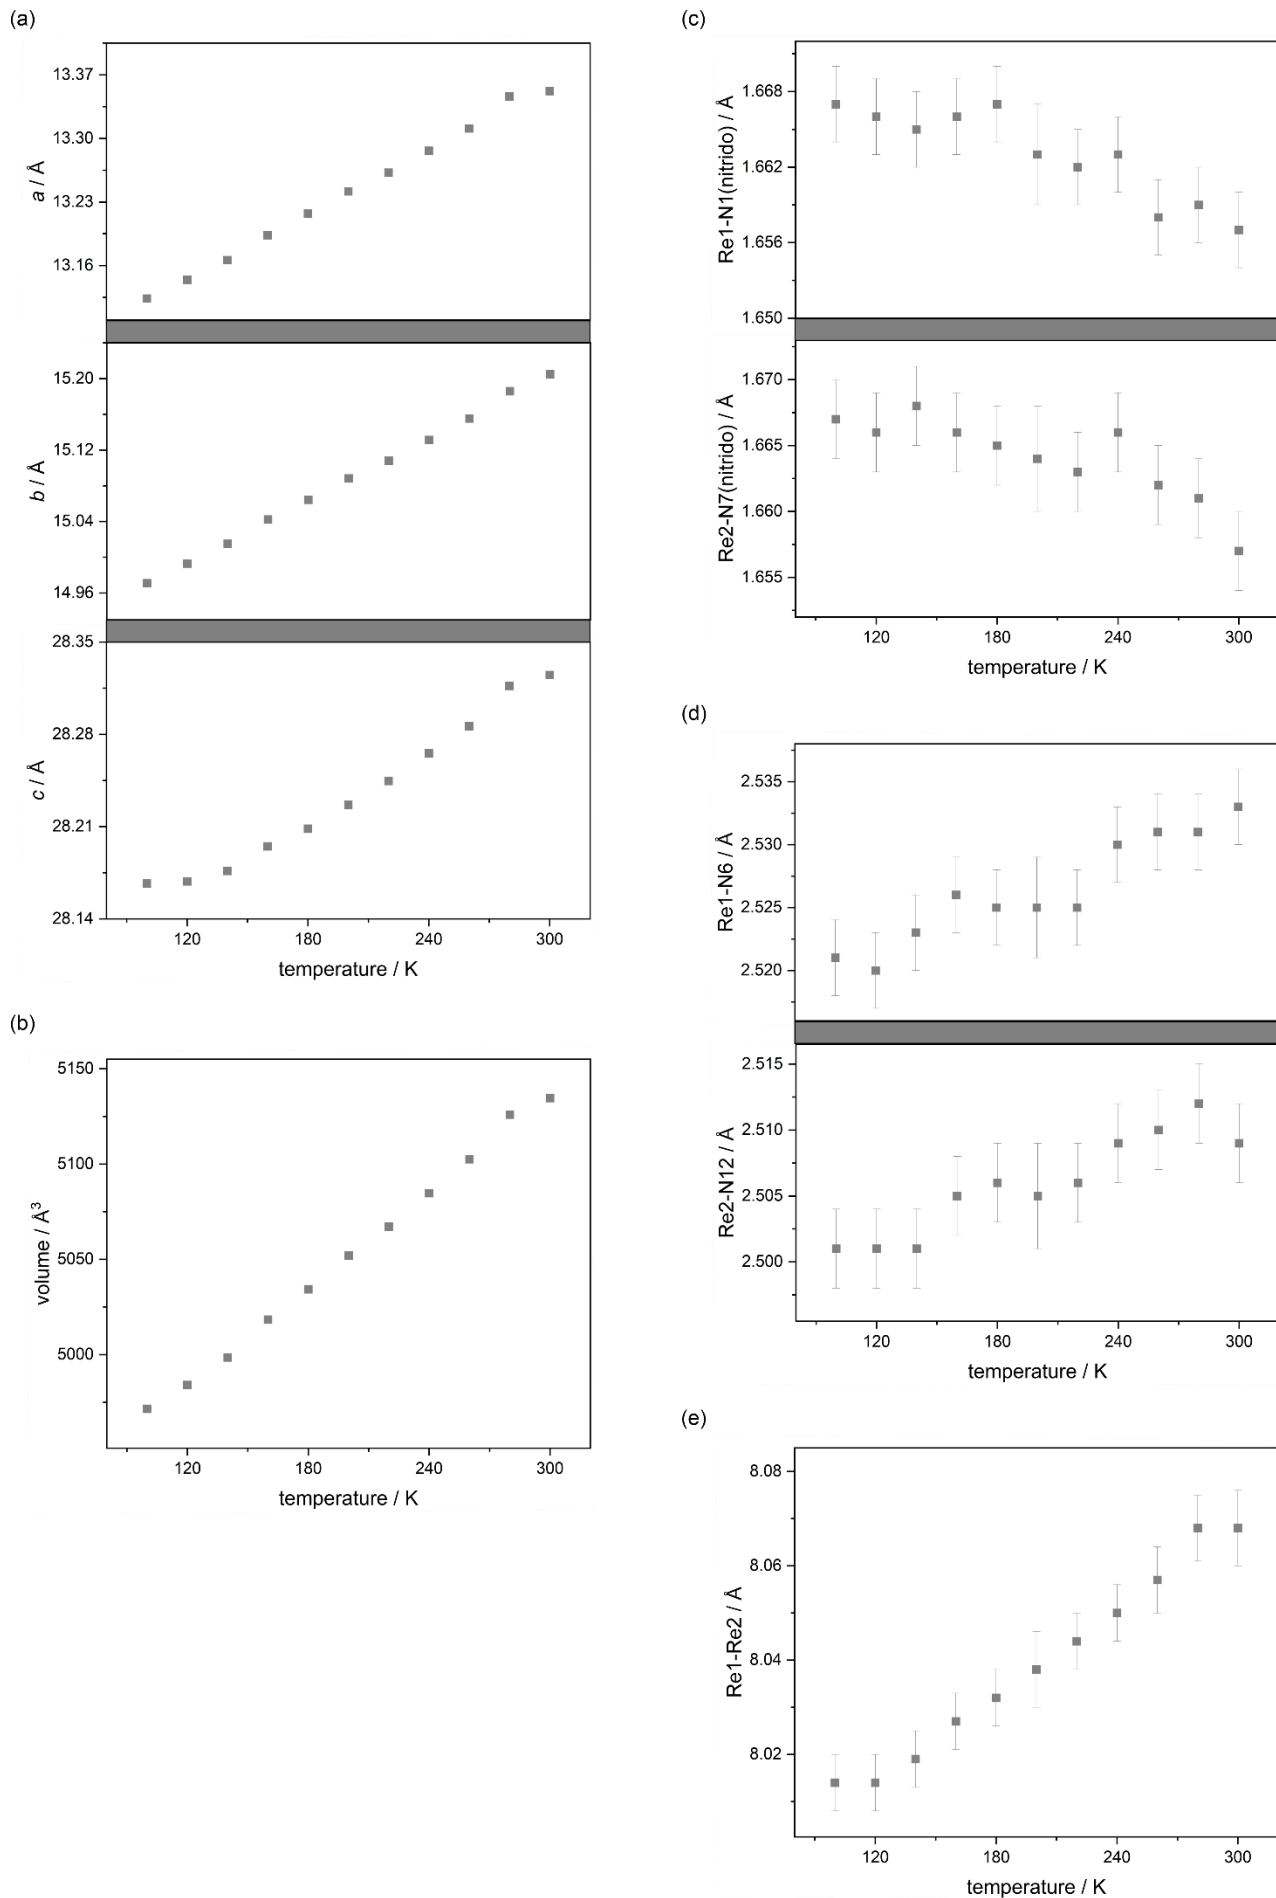

**Fig. S6** The temperature variation of unit cell parameters (a–b), as well as  $\text{Re}\equiv\text{N}(\text{nitrido})$ ,  $\text{Re1-N6}$ ,  $\text{Re2-N12}$ , and  $\text{Re-Re}$  bond lengths (c–e) within bimetallic  $\{\text{Re}^{\text{V}}_2\}^{4-}$  assemblies in the crystal structure of  $\text{Re}_2\text{-en}$ .

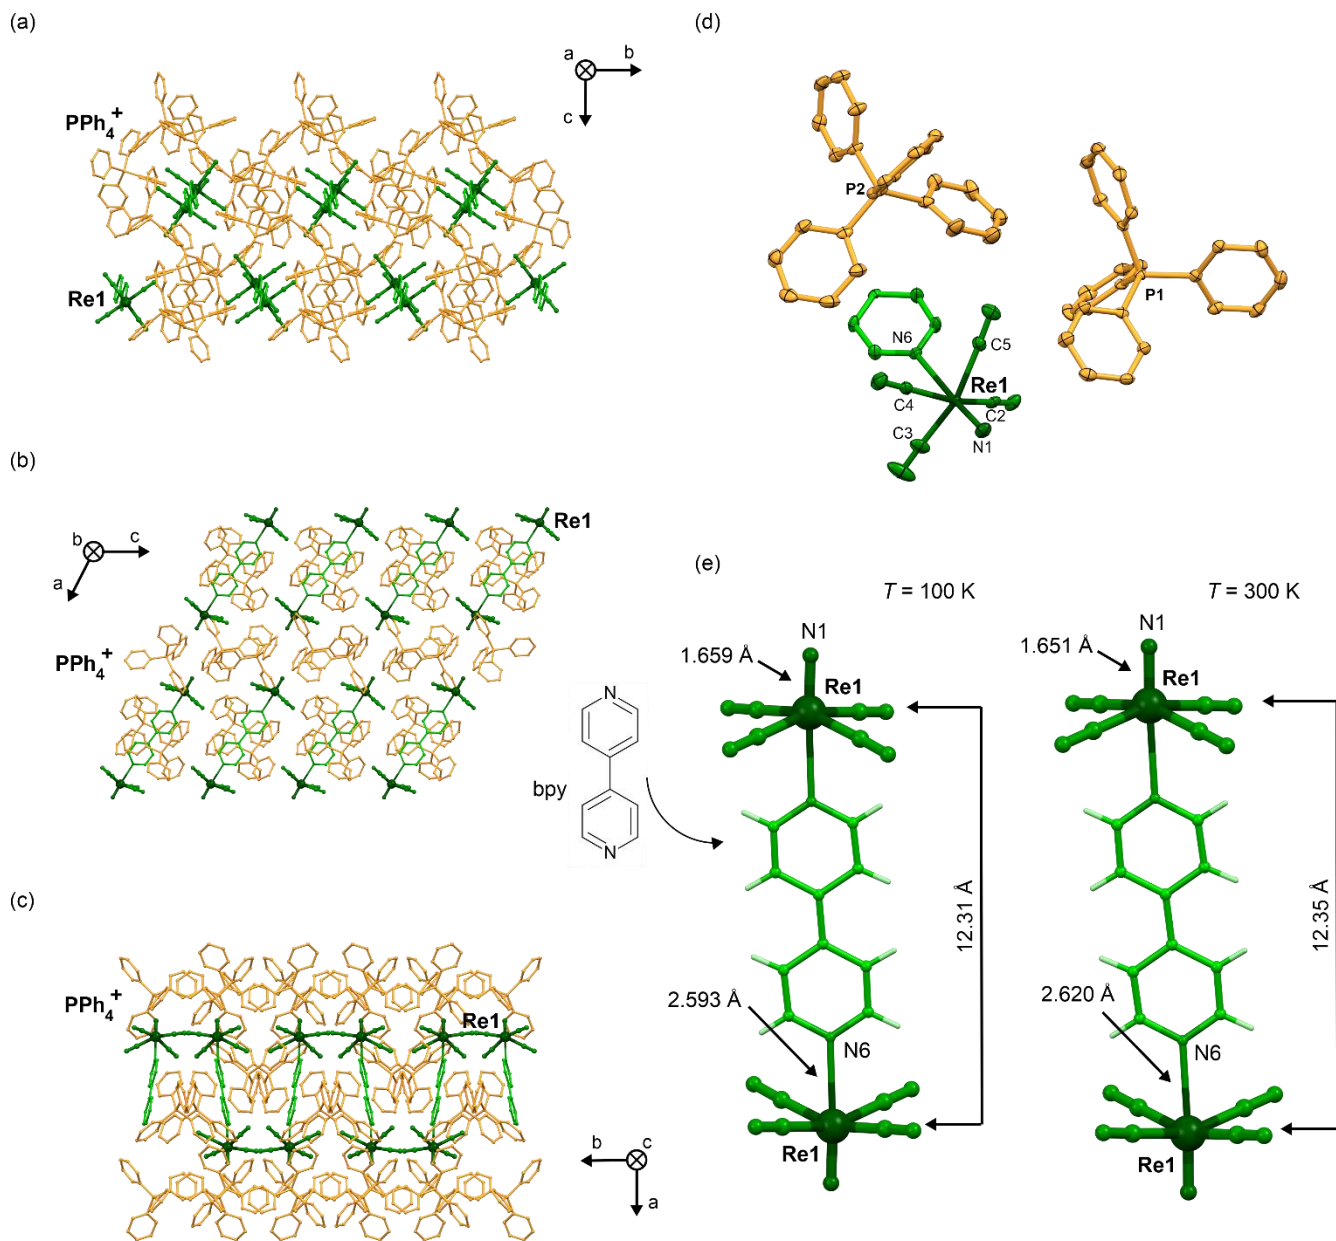

**Fig. S7** Detailed structural views of  $\text{Re}_2\text{-bpy}$  material: the crystal structure presented along the main  $a$ ,  $b$ , and  $c$  crystallographic axes (a–c), the asymmetric unit with the labeling scheme for selected symmetrically independent atoms (d), and the comparison of the metric parameters of bimetallic  $\{\text{Re}^{\text{V}}_2\}^{4-}$  assemblies at 100(2) and 300(2) K (e). Thermal ellipsoids for the asymmetric unit are presented in (d) at the 50% probability level. Hydrogen atoms in the (a–d) parts were omitted for clarity. Related detailed structural parameters are presented in Table S11.

**Table S11** Detailed crystal structure parameters of **Re<sub>2</sub>-bpy**.

| compound                     | Re <sub>2</sub> -bpy      |                           |                           |                           |                           |                           |
|------------------------------|---------------------------|---------------------------|---------------------------|---------------------------|---------------------------|---------------------------|
|                              | T / K                     | 100(2)                    | 120(2)                    | 140(2)                    | 160(2)                    | 180(2)                    |
| Re1-C / Å                    | 2.095(3) –<br>2.108(3)    | 2.087(4) –<br>2.109(4)    | 2.090(4) –<br>2.106(4)    | 2.085(4) –<br>2.109(4)    | 2.091(3) –<br>2.103(3)    | 2.081(4) –<br>2.104(4)    |
| Re1≡N1 / Å                   | 1.659(2)                  | 1.658(3)                  | 1.658(3)                  | 1.655(3)                  | 1.655(2)                  | 1.654(3)                  |
| Re1-N6 / Å                   | 2.593(2)                  | 2.586(3)                  | 2.589(3)                  | 2.593(3)                  | 2.602(2)                  | 2.597(3)                  |
| C-Re1-C ( <i>cis</i> ) / °   | 87.05(11) –<br>90.14(11)  | 86.97(14) –<br>90.19(14)  | 86.97(14) –<br>90.09(14)  | 86.91(14) –<br>90.20(14)  | 86.99(12) –<br>89.95(12)  | 86.93(14) –<br>90.21(14)  |
| C-Re1-C ( <i>trans</i> ) / ° | 161.04(12),<br>161.22(10) | 160.83(16),<br>161.35(14) | 160.88(16),<br>161.35(14) | 160.84(16),<br>161.24(14) | 160.48(12),<br>161.05(11) | 160.59(16),<br>161.35(13) |
| N1≡Re1-C / °                 | 98.90(12) –<br>100.05(12) | 99.05(14) –<br>100.03(16) | 99.08(16) –<br>100.03(16) | 99.08(16) –<br>100.06(17) | 99.29(13) –<br>100.22(13) | 98.94(14) –<br>100.09(17) |
| N1≡Re1-N6 / °                | 176.90 (10)               | 177.02(11)                | 177.04(11)                | 177.03(12)                | 177.02(12)                | 177.21(13)                |
| Re1-(L)-Re1 / Å              | 12.306(5)                 | 12.307(5)                 | 12.309(5)                 | 12.312(5)                 | 12.316(5)                 | 12.321(5)                 |
| T / K                        | 220(2)                    | 240(2)                    | 260(2)                    | 280(2)                    | 300(2)                    | –                         |
| Re1-C / Å                    | 2.079(4) –<br>2.104(4)    | 2.080(4) –<br>2.099(4)    | 2.080(4) –<br>2.102(4)    | 2.075(4) –<br>2.101(4)    | 2.081(4) –<br>2.101(3)    | –                         |
| Re1≡N1 / Å                   | 1.654(3)                  | 1.651(3)                  | 1.651(3)                  | 1.646(3)                  | 1.651(3)                  | –                         |
| Re1-N6 / Å                   | 2.603(3)                  | 2.600(3)                  | 2.604(3)                  | 2.612(3)                  | 2.620(3)                  | –                         |
| C-Re1-C ( <i>cis</i> ) / °   | 87.02(15) –<br>90.17(14)  | 87.20(15) –<br>90.01(15)  | 87.20(16) –<br>89.87(15)  | 87.01(16) –<br>89.95(15)  | 86.92(14) –<br>89.67(14)  | –                         |
| C-Re1-C ( <i>trans</i> ) / ° | 160.51(17),<br>161.35(14) | 160.65(17),<br>161.35(14) | 160.54(18),<br>161.39(15) | 160.49(18),<br>161.34(14) | 160.28(15),<br>161.03(12) | –                         |
| N1≡Re1-C / °                 | 98.96(15) –<br>99.99(18)  | 98.87(15) –<br>99.99(18)  | 98.72(16) –<br>100.08(19) | 98.82(16) –<br>100.08(19) | 99.16(13) –<br>100.23(16) | –                         |
| N1≡Re1-N6 / °                | 177.15(13)                | 177.39(13)                | 177.31(15)                | 177.42(15)                | 179.55(16)                | –                         |
| Re1-(L)-Re1 / Å              | 12.326(5)                 | 12.330(5)                 | 12.334(5)                 | 12.339(5)                 | 12.345(5)                 | –                         |

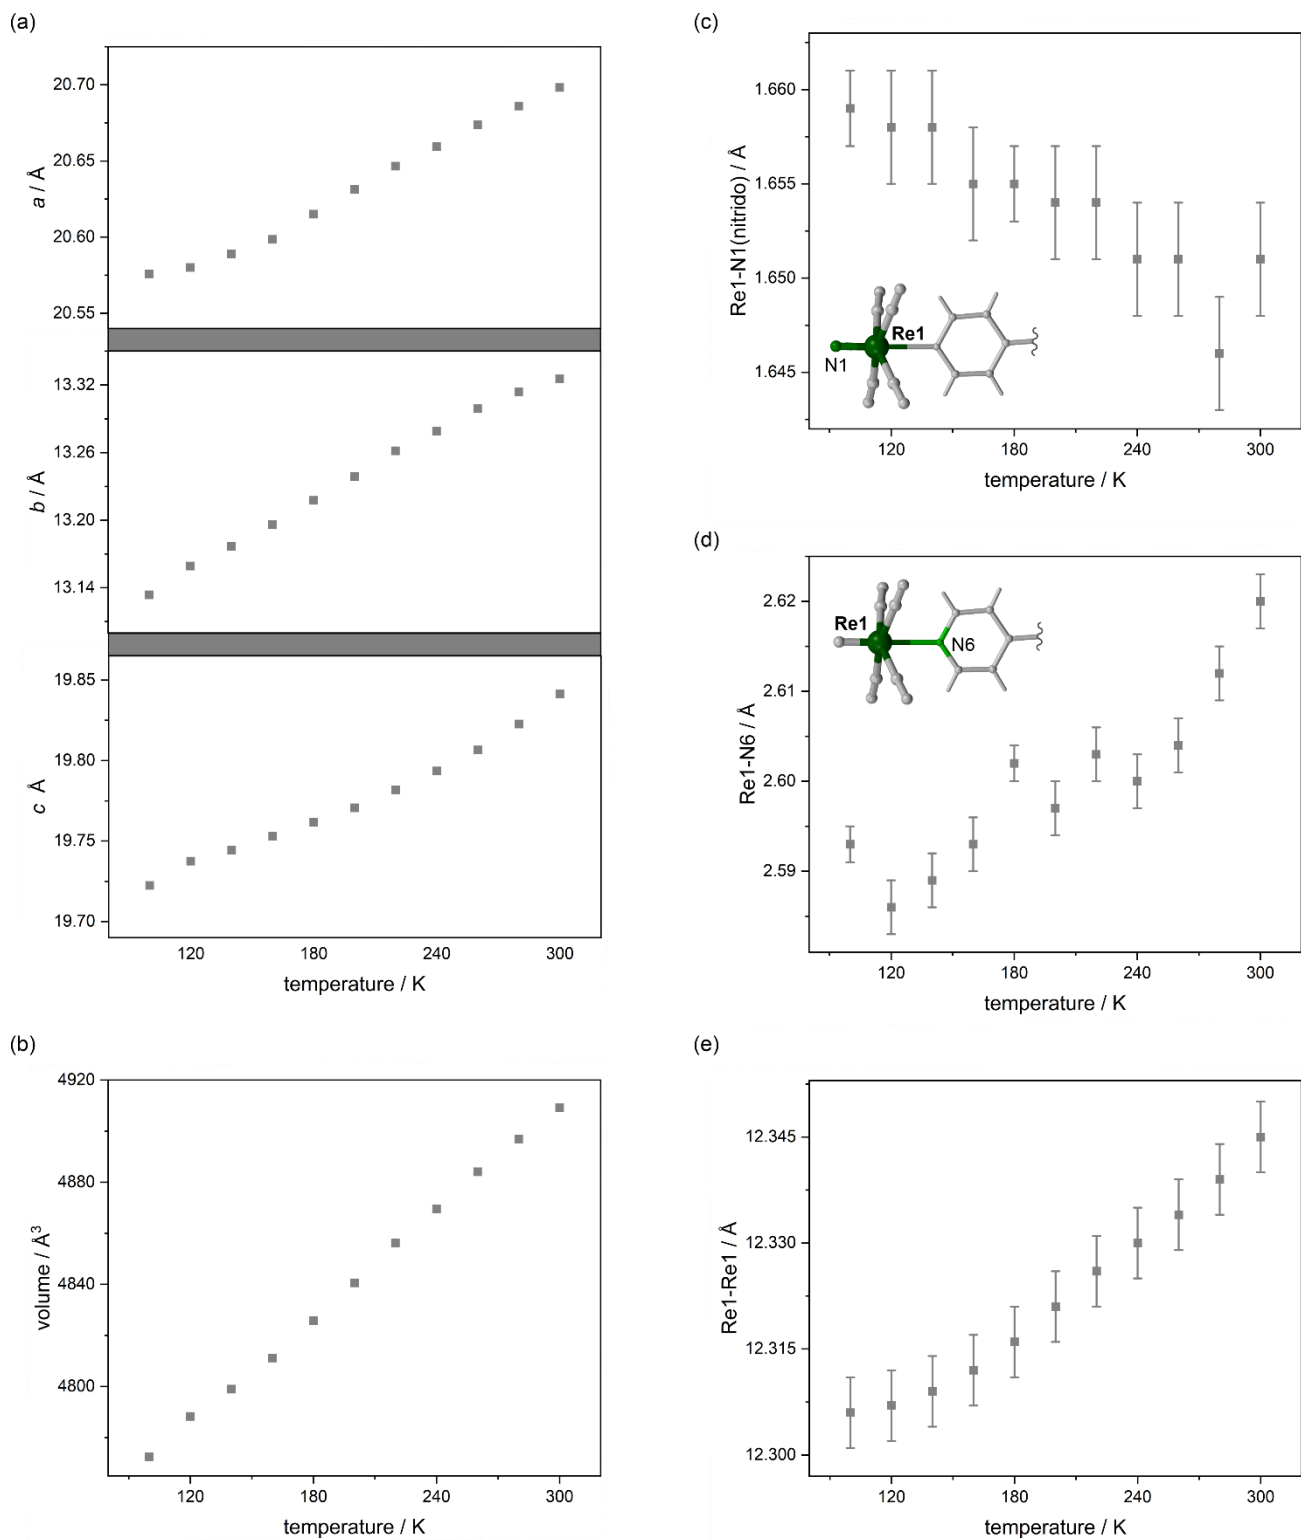

**Fig. S8** The temperature variation of unit cell parameters (a–b), as well as Re≡N(nitrido), Re1–N6, and Re1–Re1 bond lengths (c–e) within the bimetallic  $\{\text{Re}^{\text{V}}_2\}^{4-}$  assemblies in the crystal structure of **Re<sub>2</sub>-bpy**.

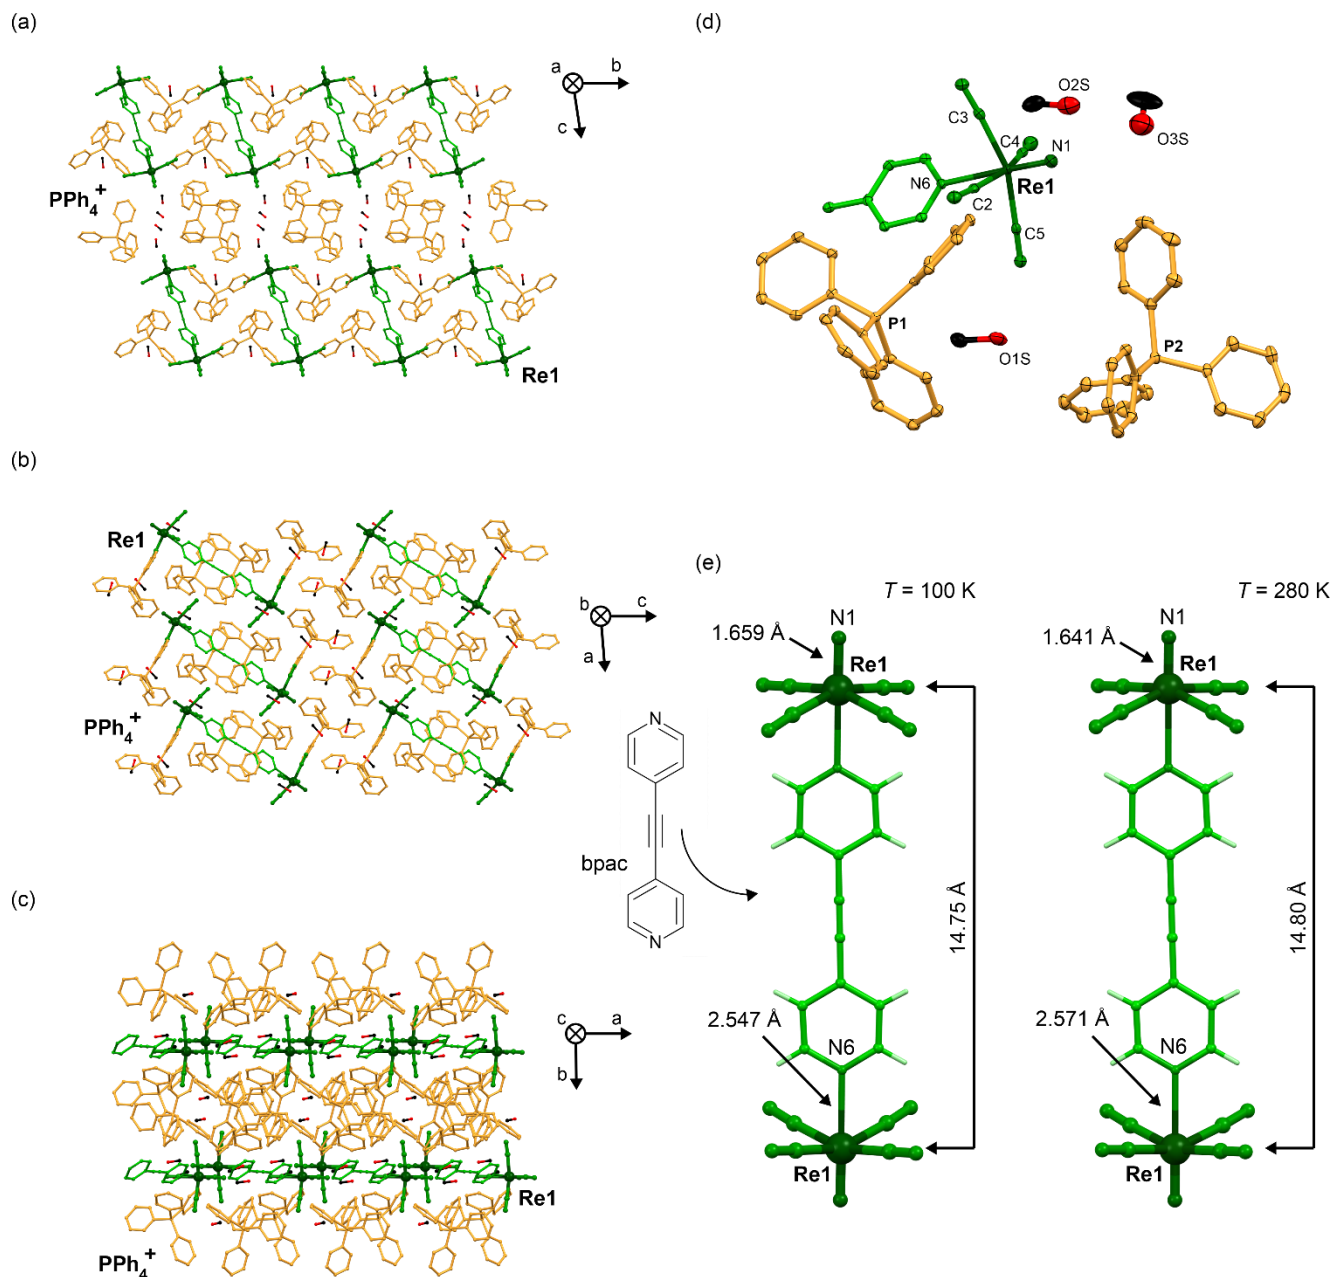

**Fig. S9** Detailed structural views of  $\text{Re}_2\text{-bpac}$  material: the crystal structure presented along the main  $a$ ,  $b$ , and  $c$  crystallographic axes ( $a$ ,  $b$ , and  $c$ , respectively), the asymmetric unit with the labeling scheme for selected symmetrically independent atoms (d), and the comparison of the metric parameters of bimetallic  $\{\text{Re}^{\text{V}}_2\}^{4-}$  assemblies at 100(2) and 300(2) K (e). Thermal ellipsoids for the asymmetric unit in (d) are presented at the 50% probability level. Hydrogen atoms in (a–d) were omitted for clarity. Related detailed structural parameters are presented in Table S12.

**Table S12** Detailed crystal structure parameters of **Re<sub>2</sub>-bpac**.

| compound                     | Re <sub>2</sub> -bpac     |                           |                           |                           |                           |                           |
|------------------------------|---------------------------|---------------------------|---------------------------|---------------------------|---------------------------|---------------------------|
|                              | T / K                     | 100(2)                    | 120(2)                    | 140(2)                    | 160(2)                    | 180(2)                    |
| Re1-C / Å                    | 2.103(3) –<br>2.114(3)    | 2.100(3) –<br>2.117(3)    | 2.095(3) –<br>2.114(3)    | 2.093(3) –<br>2.112(3)    | 2.098(3) –<br>2.111(3)    | 2.097(3) –<br>2.113(3)    |
| Re1≡N1 / Å                   | 1.659(3)                  | 1.659(3)                  | 1.660(3)                  | 1.663(3)                  | 1.662(3)                  | 1.655(3)                  |
| Re1-N6 / Å                   | 2.547(2)                  | 2.548(2)                  | 2.550(2)                  | 2.555(2)                  | 2.557(2)                  | 2.557(2)                  |
| C-Re1-C ( <i>cis</i> ) / °   | 85.57(11) –<br>90.80(10)  | 85.65(11) –<br>90.70(11)  | 85.66(11) –<br>90.60(11)  | 85.43(12) –<br>90.57(11)  | 85.54(12) –<br>90.65(12)  | 85.80(11) –<br>90.53(11)  |
| C-Re1-C ( <i>trans</i> ) / ° | 159.74(11),<br>161.12(11) | 159.65(11),<br>161.08(11) | 159.79(11),<br>161.34(11) | 159.97(12),<br>161.09(12) | 159.95(12),<br>161.10(12) | 159.98(10),<br>161.14(11) |
| N1≡Re1-C / °                 | 99.02(12) –<br>101.01(12) | 99.02(13) –<br>100.95(12) | 99.23(12) –<br>100.98(12) | 99.20(14) –<br>100.78(13) | 99.25(15) –<br>100.64(13) | 99.04(13) –<br>100.76(12) |
| N1≡Re1-N6 / °                | 177.99(11)                | 177.99(11)                | 177.92(11)                | 178.16(12)                | 178.20(12)                | 177.94(11)                |
| Re1-(L)-Re1 / Å              | 14.751(4)                 | 14.749(4)                 | 14.757(5)                 | 14.760(5)                 | 14.773(5)                 | 14.77(5)                  |
| T / K                        | 220(2)                    | 240(2)                    | 260(2)                    | 280(2)                    | –                         | –                         |
| Re1-C / Å                    | 2.096(4) –<br>2.112(4)    | 2.093(3) –<br>2.113(3)    | 2.093(4) –<br>2.110(4)    | 2.089(6) –<br>2.119(6)    | –                         | –                         |
| Re1≡N1 / Å                   | 1.660(3)                  | 1.652(3)                  | 1.654(3)                  | 1.641(5)                  | –                         | –                         |
| Re1-N6 / Å                   | 2.561(2)                  | 2.563(2)                  | 2.565(3)                  | 2.571(3)                  | –                         | –                         |
| C-Re1-C ( <i>cis</i> ) / °   | 85.66(12) –<br>90.49(12)  | 85.72(11) –<br>90.40(11)  | 85.94(14) –<br>90.27(14)  | 85.9(2) –<br>90.3(2)      | –                         | –                         |
| C-Re1-C ( <i>trans</i> ) / ° | 159.94(12),<br>161.00(13) | 160.02(11),<br>161.03(11) | 160.03(14),<br>161.13(14) | 159.94(19),<br>160.9(2)   | –                         | –                         |
| N1≡Re1-C / °                 | 99.24(14) –<br>100.82(14) | 99.13(14) –<br>100.66(13) | 99.22(16) –<br>100.74(16) | 99.3(2) –<br>100.8(2)     | –                         | –                         |
| N1≡Re1-N6 / °                | 178.20(13)                | 178.03(12)                | 178.13(15)                | 177.88(14)                | –                         | –                         |
| Re1-(L)-Re1 / Å              | 14.770(5)                 | 14.774(5)                 | 14.778(6)                 | 14.800(9)                 | –                         | –                         |

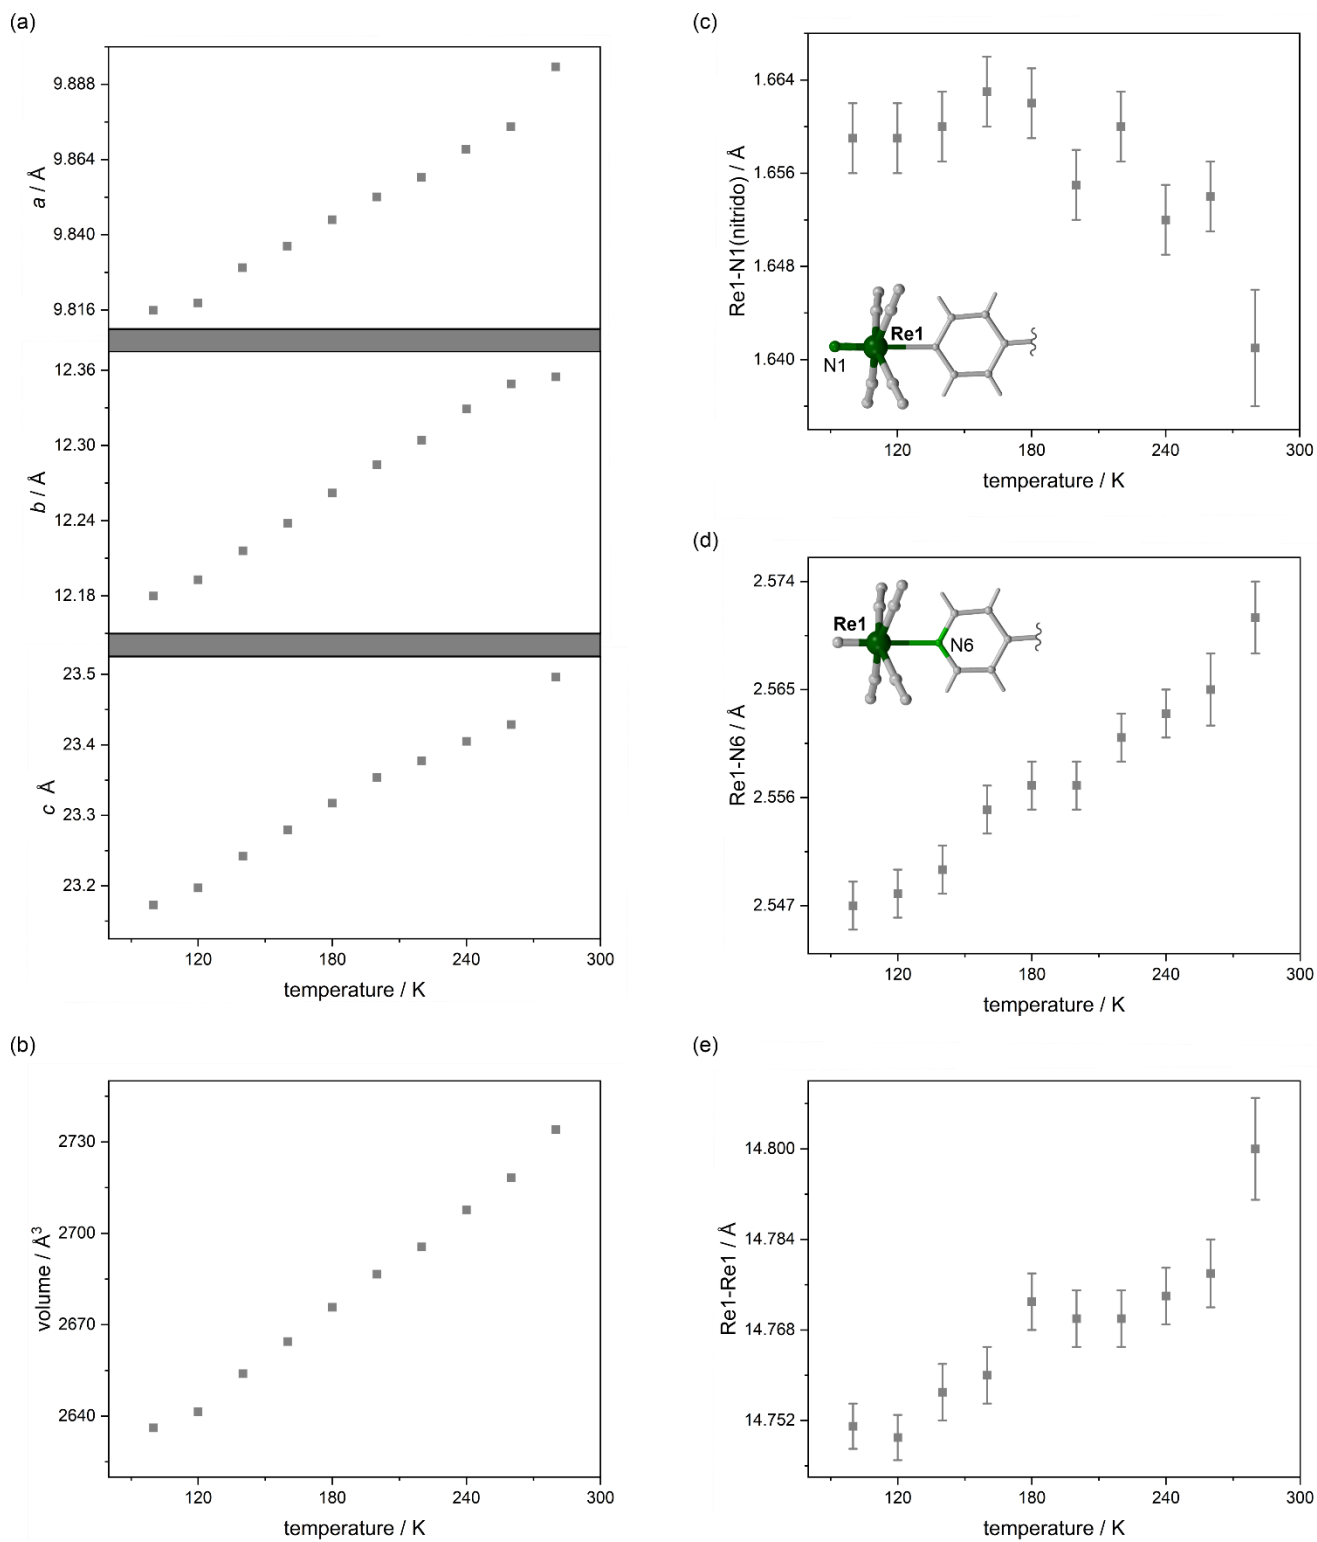

**Fig. S10** The temperature variation of unit cell parameters (a–b), as well as Re≡N(nitrido), Re1–N6, and Re1–Re1 bond lengths (c–e) within the bimetallic  $\{Re^V_2\}^{4-}$  assemblies in the crystal structure of **Re<sub>2</sub>-bpac**.

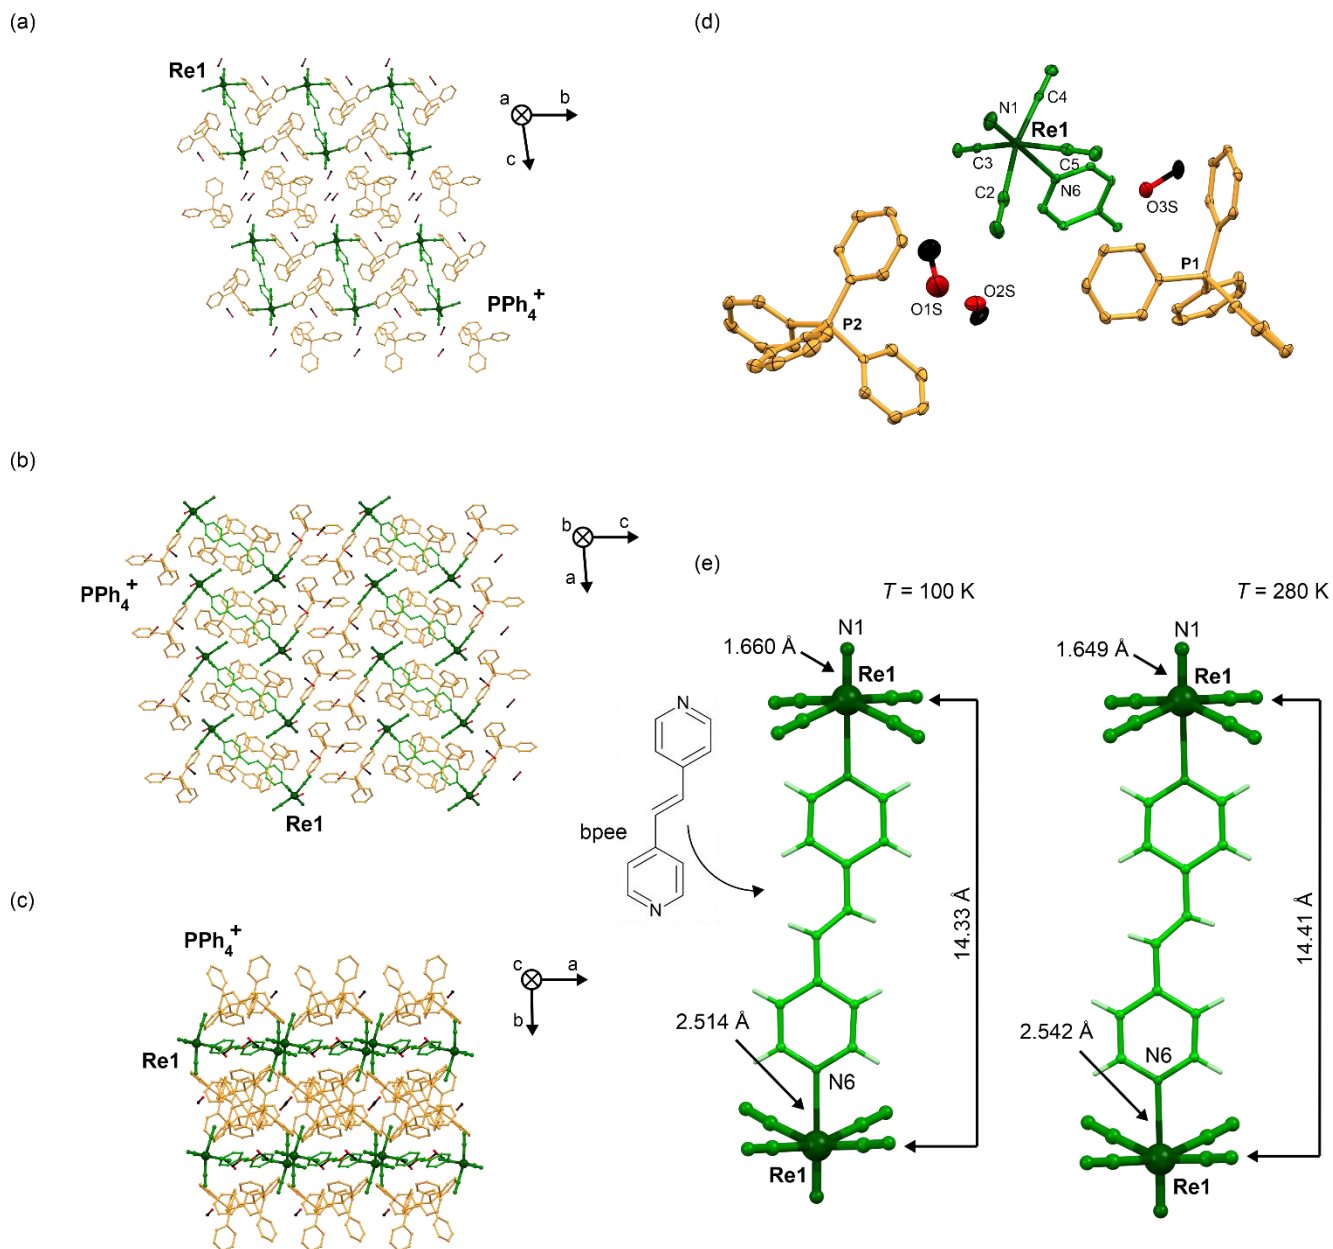

**Fig. S11** Detailed structural views of **Re<sub>2</sub>-bpee** material: the crystal structure presented along the main *a*, *b*, and *c* crystallographic axes (*a*, *b*, and *c*, respectively), the asymmetric unit with the labeling scheme for selected symmetrically independent atoms (*d*), and the comparison of the metric parameters of bimetallic  $\{\text{Re}^{\text{V}}_2\}^{4-}$  assemblies at 100(2) and 300(2) K (*e*). Thermal ellipsoids for the asymmetric unit in (*d*) are presented at the 50% probability level. Hydrogen atoms in the (*a*–*d*) parts were omitted for clarity. Related detailed structural parameters are presented in Table S13.



**Table S13** Detailed crystal structure parameters of **Re<sub>2</sub>-bpee**.

| compound                     | Re <sub>2</sub> -bpee     |                           |                           |                           |                           |                           |
|------------------------------|---------------------------|---------------------------|---------------------------|---------------------------|---------------------------|---------------------------|
|                              | 100(2)                    | 120(2)                    | 140(2)                    | 160(2)                    | 180(2)                    | 200(2)                    |
| <i>T</i> / K                 | 100(2)                    | 120(2)                    | 140(2)                    | 160(2)                    | 180(2)                    | 200(2)                    |
| Re1-C / Å                    | 2.096(5) –<br>2.109(5)    | 2.100(5) –<br>2.108(5)    | 2.096(5) –<br>2.120(5)    | 2.097(6) –<br>2.113(5)    | 2.095(6) –<br>2.116(6)    | 2.089(6) –<br>2.118(6)    |
| Re1≡N1 / Å                   | 1.660(4)                  | 1.663(4)                  | 1.660(4)                  | 1.656(4)                  | 1.658(4)                  | 1.649(4)                  |
| Re1-N6 / Å                   | 2.514(3)                  | 2.522(3)                  | 2.526(3)                  | 2.521(4)                  | 2.527(4)                  | 2.533(4)                  |
| C-Re1-C ( <i>cis</i> ) / °   | 87.09(17) –<br>89.66(18)  | 87.27(17) –<br>89.78(18)  | 87.74(18) –<br>89.08(18)  | 87.36(18) –<br>89.74(19)  | 87.6(2) –<br>89.6(2)      | 87.46(19) –<br>89.4(2)    |
| C-Re1-C ( <i>trans</i> ) / ° | 159.00(16),<br>163.01(17) | 159.13(16),<br>163.24(17) | 159.43(17),<br>163.29(17) | 159.08(17),<br>163.04(18) | 159.61(17),<br>163.35(18) | 159.13(18),<br>162.95(19) |
| N1≡Re1-C / °                 | 98.3(2) –<br>100.67(19)   | 98.1(2) –<br>100.47(18)   | 98.1(2) –<br>100.40(19)   | 98.3(2) –<br>100.71(19)   | 98.1(2) –<br>100.3(2)     | 98.2(2) –<br>100.6(2)     |
| N1≡Re1-N6 / °                | 178.88(18)                | 178.56(17)                | 178.49(18)                | 178.51(18)                | 178.43(19)                | 178.4(2)                  |
| Re1-(L)-Re1 / Å              | 14.334(4)                 | 14.344(4)                 | 14.362(5)                 | 14.365(5)                 | 14.365(5)                 | 14.377(5)                 |
| <i>T</i> / K                 | 220(2)                    | 240(2)                    | 260(2)                    | 280(2)                    | –                         | –                         |
| Re1-C / Å                    | 2.090(7) –<br>2.129(6)    | 2.085(7) –<br>2.113(6)    | 2.096(6) –<br>2.107(6)    | 2.093(5) –<br>2.119(6)    | –                         | –                         |
| Re1≡N1 / Å                   | 1.650(5)                  | 1.649(5)                  | 1.647(5)                  | 1.649(4)                  | –                         | –                         |
| Re1-N6 / Å                   | 2.538(4)                  | 2.542(4)                  | 2.545(4)                  | 2.542(3)                  | –                         | –                         |
| C-Re1-C ( <i>cis</i> ) / °   | 87.6(2) –<br>89.6(2)      | 87.3(2) –<br>89.6(2)      | 87.4(2) –<br>89.6(2)      | 87.6(2) –<br>89.6(2)      | –                         | –                         |
| C-Re1-C ( <i>trans</i> ) / ° | 159.63(19),<br>163.1(2)   | 159.7(2),<br>162.8(2)     | 159.8(2),<br>162.9(2)     | 159.59(18),<br>162.83(19) | –                         | –                         |
| N1≡Re1-C / °                 | 98.1(3) –<br>100.2(2)     | 98.3(3) –<br>100.3(2)     | 98.4(3) –<br>100.4(2)     | 98.4(2) –<br>100.4(2)     | –                         | –                         |
| N1≡Re1-N6 / °                | 178.3(2)                  | 178.2(2)                  | 178.4(2)                  | 178.6(2)                  | –                         | –                         |
| Re1-(L)-Re1 / Å              | 14.391(5)                 | 14.392(5)                 | 14.399(6)                 | 14.408(9)                 | –                         | –                         |

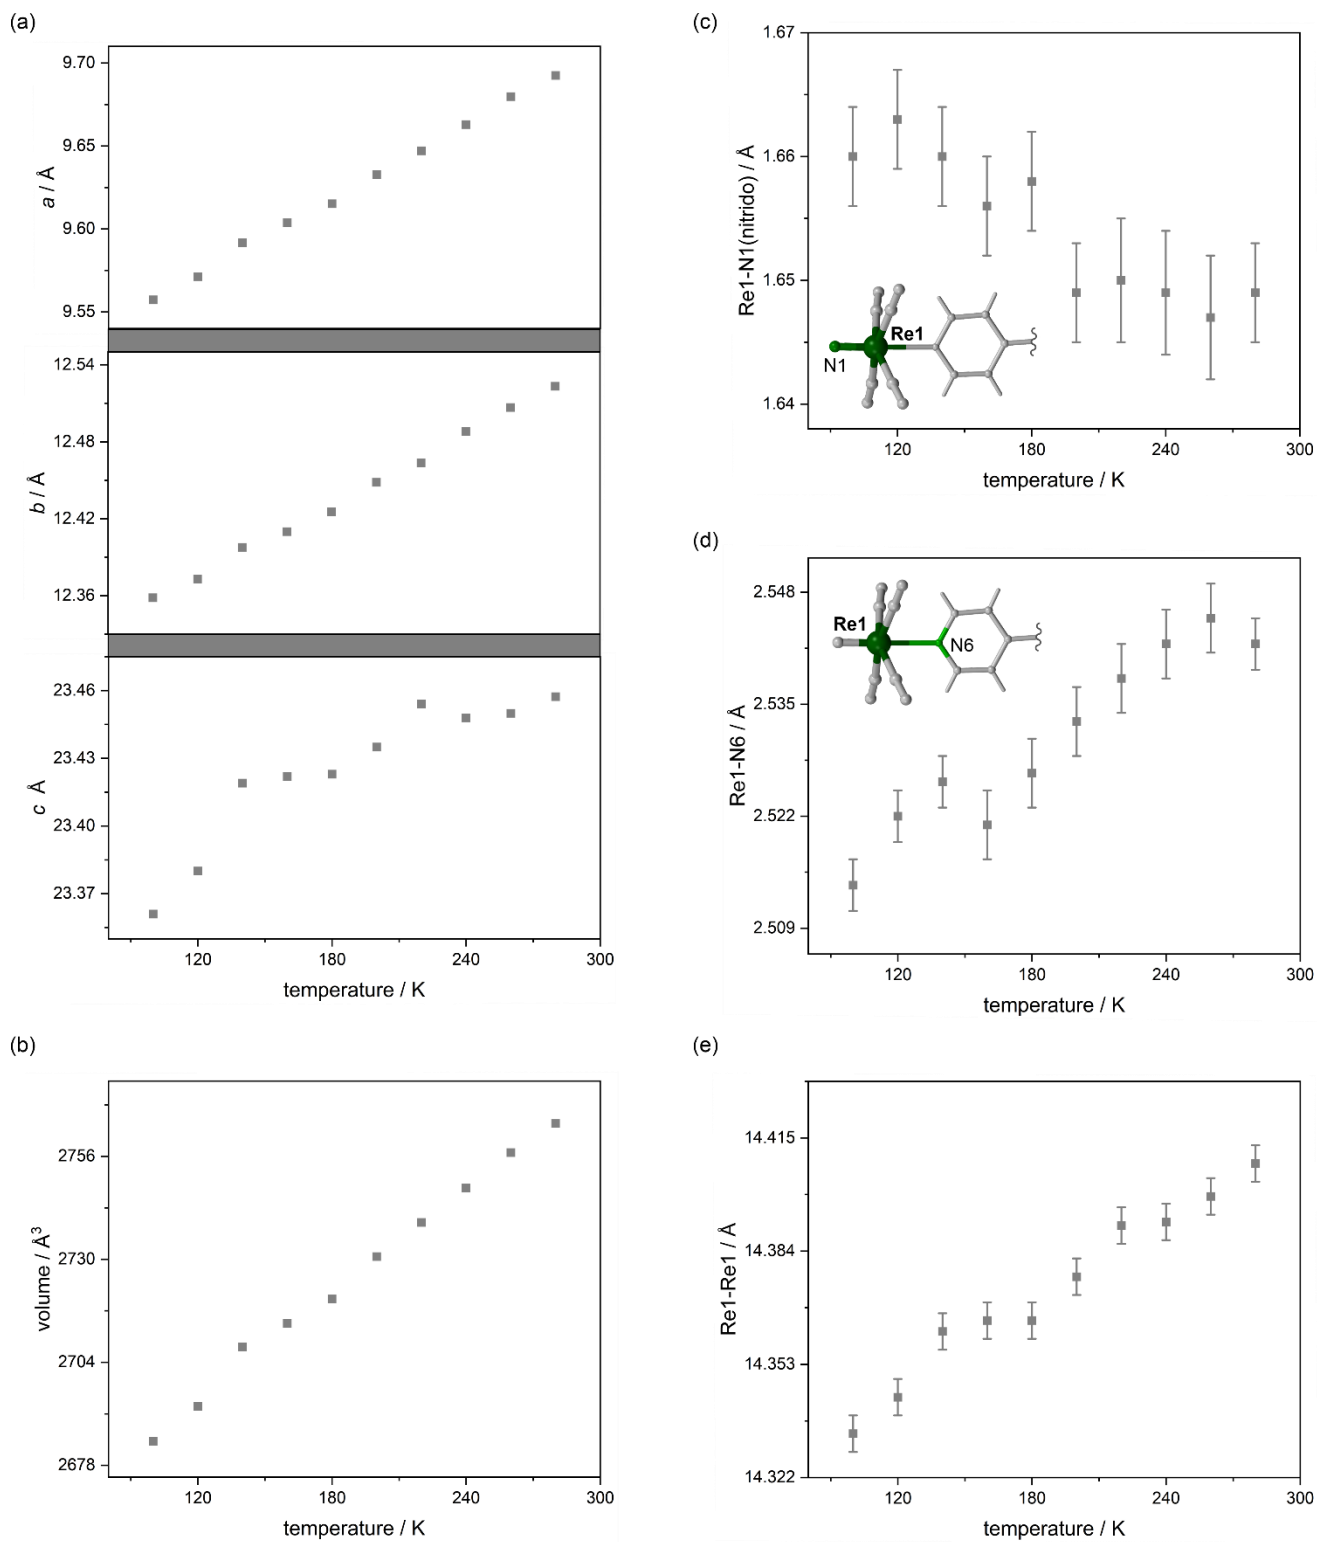

**Fig. S12** The temperature variation of unit cell parameters (a–b), as well as Re≡N(nitrido), Re1–N6, and Re1–Re1 bond lengths (c–e) within bimetallic  $\{ReV_2\}^{4-}$  assemblies in the crystal structure of  $Re_2$ -bpee.

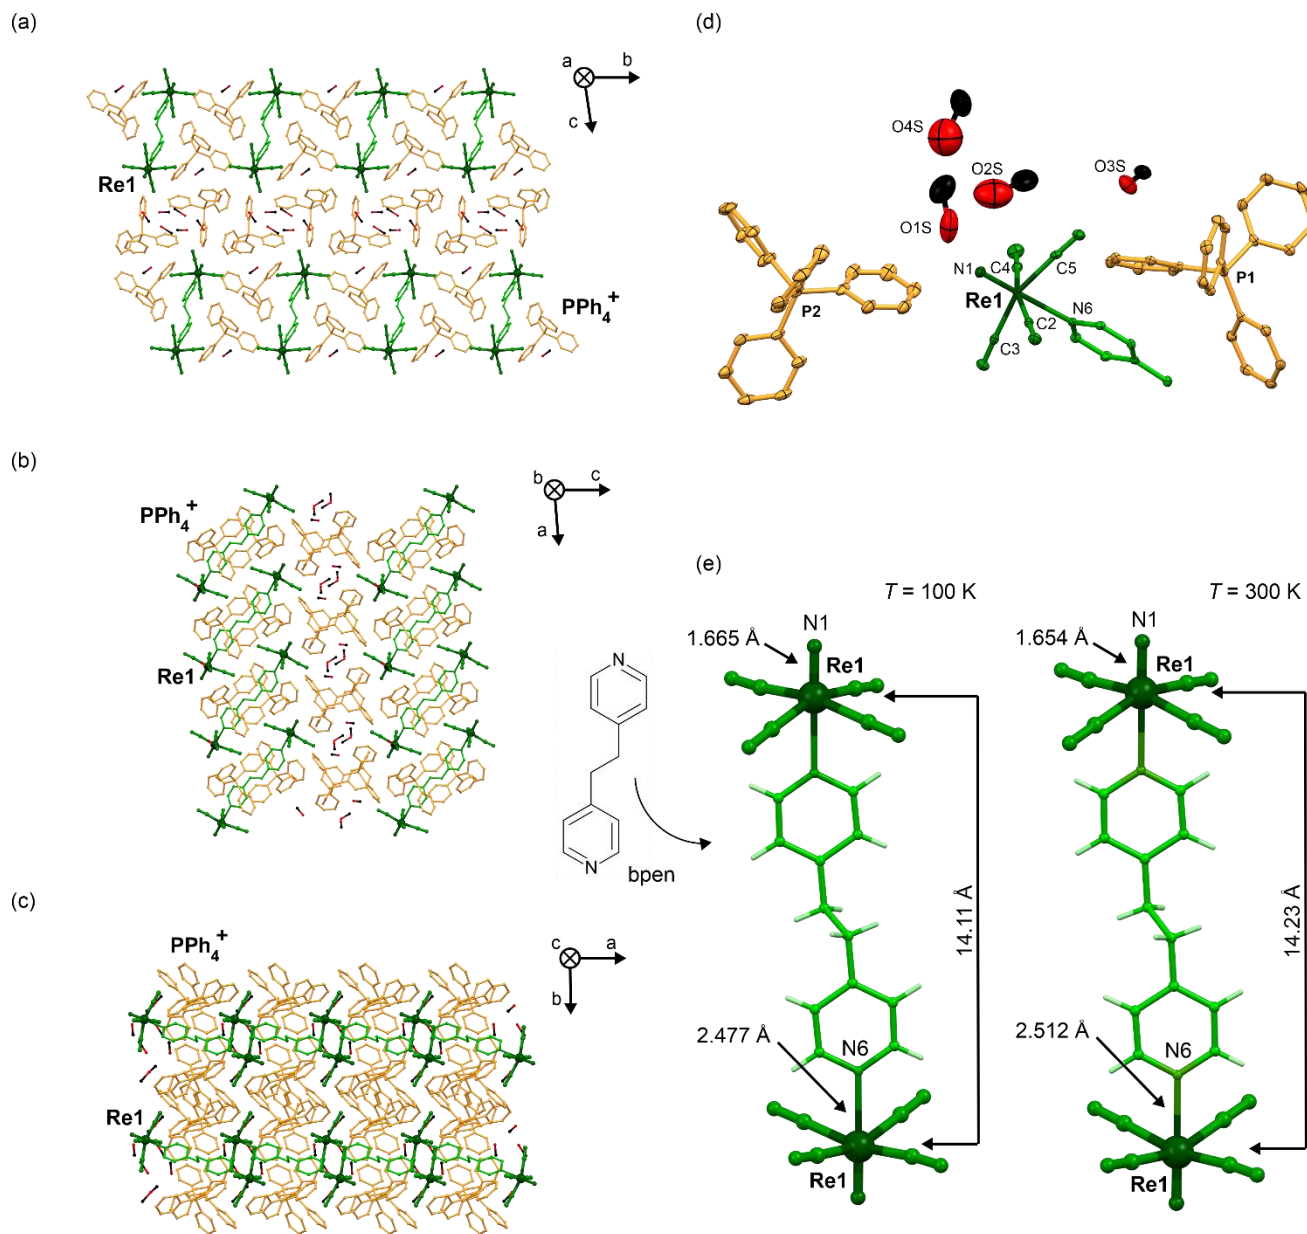

**Fig. S13** Detailed structural views of  $\text{Re}_2\text{-bpen}$  material: the crystal structure presented along the main  $a$ ,  $b$ , and  $c$  crystallographic axes ( $a$ ,  $b$ , and  $c$ , respectively), the asymmetric unit with the labeling scheme for selected symmetrically independent atoms (d), and the comparison of the metric parameters of bimetallic  $\{\text{Re}^{\text{V}}_2\}^{4-}$  assemblies at  $100(2)$  and  $300(2)$  K (e). Thermal ellipsoids for the asymmetric unit in (d) are presented at the 50% probability level. Hydrogen atoms in the (a–d) parts were omitted for clarity. Related detailed structural parameters are presented in Table S14.

**Table S14** Detailed crystal structure parameters of **Re<sub>2</sub>-bpen**.

| compound                     | Re <sub>2</sub> -bpen     |                           |                           |                           |                           |                           |
|------------------------------|---------------------------|---------------------------|---------------------------|---------------------------|---------------------------|---------------------------|
|                              | 100(2)                    | 120(2)                    | 140(2)                    | 160(2)                    | 180(2)                    | 200(2)                    |
| <i>T</i> / K                 |                           |                           |                           |                           |                           |                           |
| Re1-C / Å                    | 2.097(3) –<br>2.121(3)    | 2.099(3) –<br>2.119(3)    | 2.098(3) –<br>2.120(3)    | 2.099(3) –<br>2.118(3)    | 2.104(3) –<br>2.118(3)    | 2.097(3) –<br>2.118(4)    |
| Re1≡N1 / Å                   | 1.665(2)                  | 1.665(2)                  | 1.663(3)                  | 1.664(3)                  | 1.662(3)                  | 1.661(3)                  |
| Re1-N6 / Å                   | 2.477(2)                  | 2.481(2)                  | 2.483(2)                  | 2.485(2)                  | 2.488(2)                  | 2.495(2)                  |
| C-Re1-C ( <i>cis</i> ) / °   | 87.41(11) –<br>90.15(11)  | 87.42(11) –<br>89.99(11)  | 87.39(11) –<br>90.12(12)  | 87.52(12) –<br>90.07(12)  | 87.45(12) –<br>90.18(13)  | 87.70(13) –<br>89.92(13)  |
| C-Re1-C ( <i>trans</i> ) / ° | 159.67(11),<br>166.21(11) | 159.67(11),<br>166.04(11) | 159.80(12),<br>166.12(11) | 159.77(12),<br>166.05(12) | 159.79(12),<br>165.88(12) | 159.89(13),<br>165.85(12) |
| N1≡Re1-C / °                 | 95.97(11) –<br>100.50(12) | 96.23(12) –<br>100.47(12) | 96.23(12) –<br>100.48(13) | 96.20(13) –<br>100.40(13) | 96.22(13) –<br>100.31(13) | 96.22(13) –<br>100.01(14) |
| N1≡Re1-N6 / °                | 179.09(10)                | 179.12(11)                | 179.02(11)                | 179.14(12)                | 179.28(12)                | 179.33(13)                |
| Re1-(L)-Re1 / Å              | 14.113(4)                 | 14.120(4)                 | 14.130(4)                 | 14.141(4)                 | 14.150(4)                 | 14.163(4)                 |
| <i>T</i> / K                 | 220(2)                    | 240(2)                    | 260(2)                    | 280(2)                    | 300(2)                    | –                         |
| Re1-C / Å                    | 2.100(3) –<br>2.114(4)    | 2.102(4) –<br>2.116(4)    | 2.102(4) –<br>2.122(4)    | 2.097(4) –<br>2.116(4)    | 2.104(5) –<br>2.119(5)    | –                         |
| Re1≡N1 / Å                   | 1.658(3)                  | 1.655(3)                  | 1.660(3)                  | 1.659(3)                  | 1.654(3)                  | –                         |
| Re1-N6 / Å                   | 2.498(2)                  | 2.499(2)                  | 2.504(3)                  | 2.505(3)                  | 2.512(3)                  | –                         |
| C-Re1-C ( <i>cis</i> ) / °   | 87.46(13) –<br>90.02(14)  | 87.41(13) –<br>90.07(14)  | 87.59(14) –<br>90.04(15)  | 87.65(15) –<br>89.85(16)  | 88.67(17) –<br>89.85(18)  | –                         |
| C-Re1-C ( <i>trans</i> ) / ° | 159.94(13),<br>165.52(12) | 159.85(13),<br>165.27(13) | 159.88(14),<br>165.31(14) | 159.95(15),<br>165.15(14) | 159.74(16),<br>165.28(15) | –                         |
| N1≡Re1-C / °                 | 96.30(14) –<br>100.05(14) | 96.52(14) –<br>100.04(14) | 96.66(15) –<br>100.10(16) | 96.81(16) –<br>100.19(17) | 96.43(17) –<br>100.26(17) | –                         |
| N1≡Re1-N6 / °                | 179.48(13)                | 179.44(13)                | 179.56(15)                | 179.34(15)                | 179.55(16)                | –                         |
| Re1-(L)-Re1 / Å              | 14.175(4)                 | 14.185(4)                 | 14.199(4)                 | 14.206(4)                 | 14.229(4)                 | –                         |

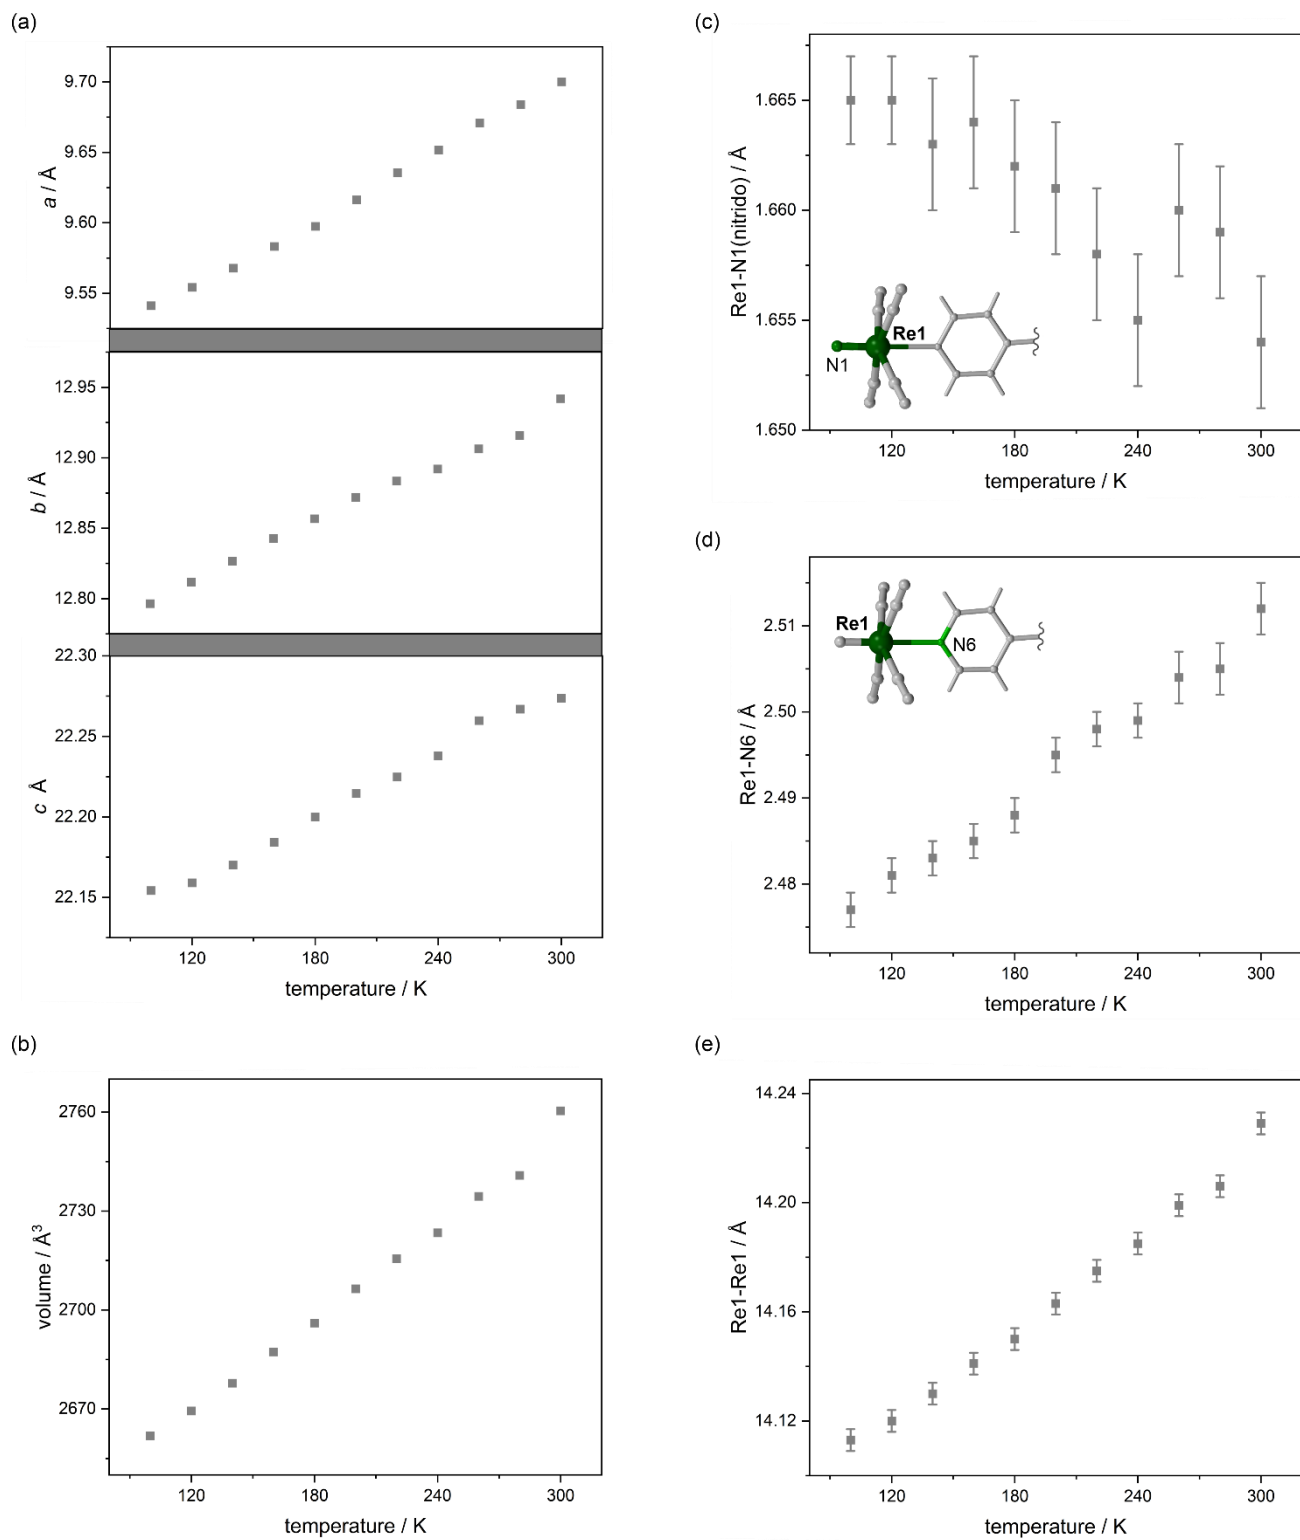

**Fig. S14** The temperature variation of unit cell parameters (a–b), as well as  $\text{Re}\equiv\text{N}(\text{nitrido})$ ,  $\text{Re1-N6}$ , and  $\text{Re1-Re1}$  bond lengths (c–e) within the bimetallic  $\{\text{Re}_2^{\text{V}}\}^{4-}$  assemblies in the crystal structure of **Re<sub>2</sub>-bpen**.

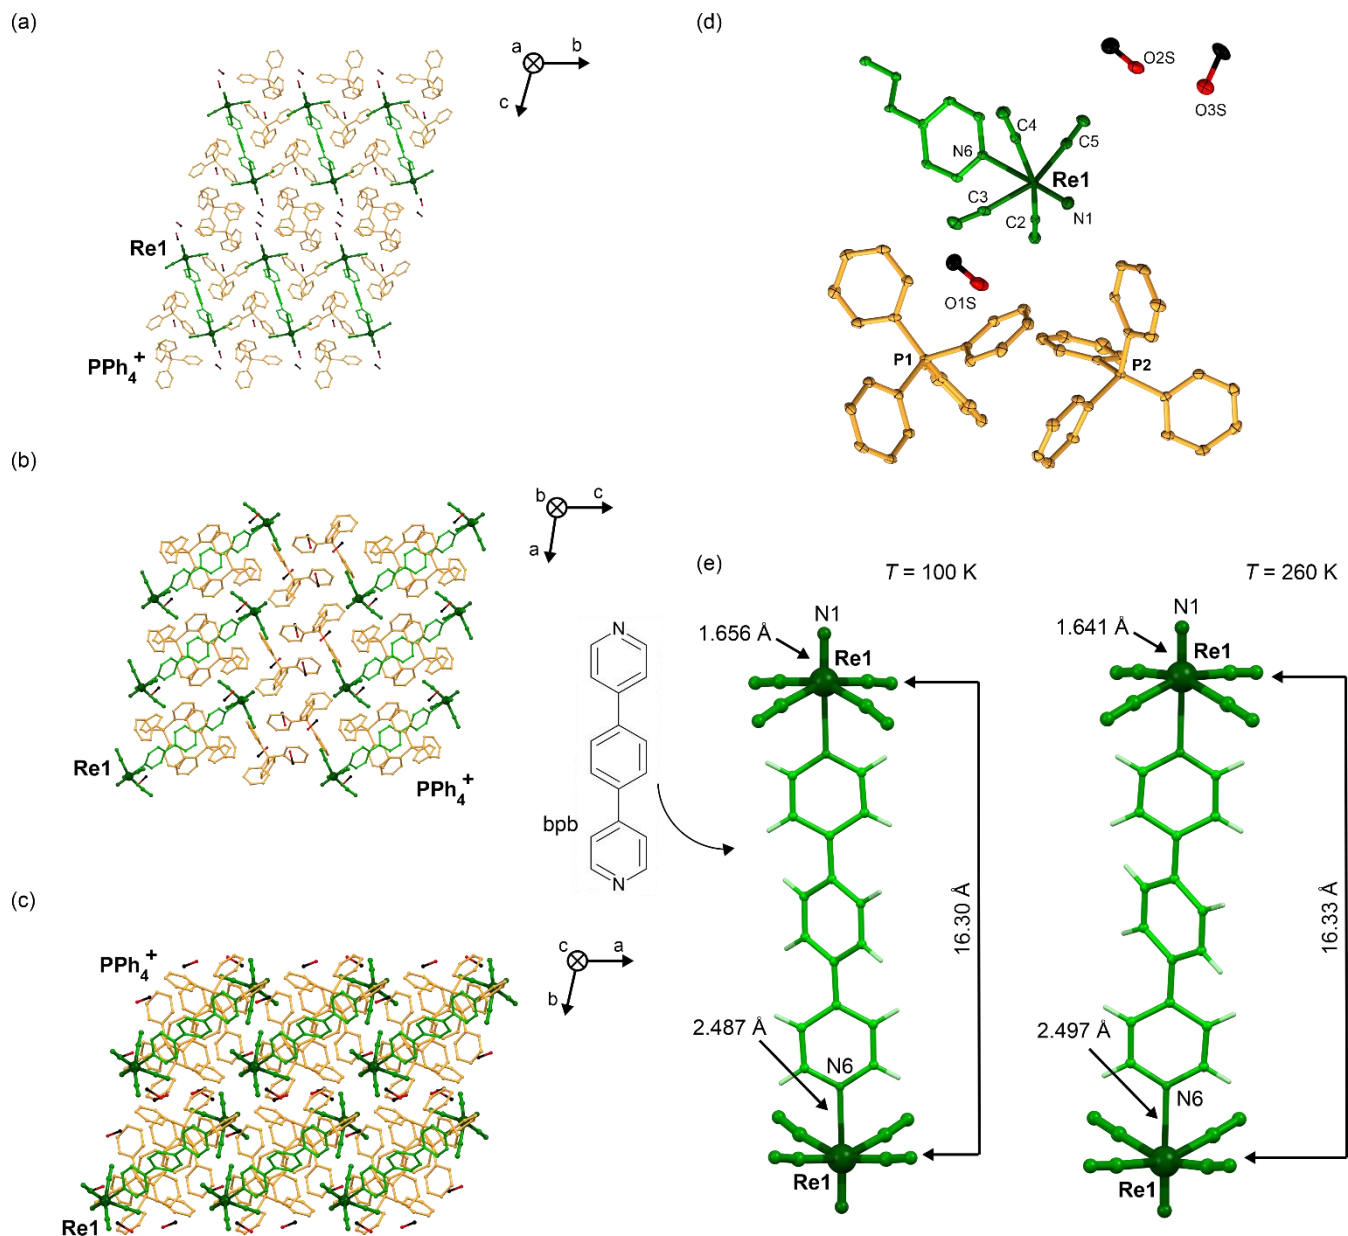

**Fig. S15** Detailed structural views of  $\text{Re}_2\text{-bpb}$  material: the crystal structure presented along the main  $a$ ,  $b$ , and  $c$  crystallographic axes ( $a$ ,  $b$ , and  $c$ , respectively), the asymmetric unit with the labeling scheme for selected symmetrically independent atoms (d), and the comparison of the metric parameters of bimetallic  $\{\text{Re}^{\text{V}}_2\}^{4-}$  assemblies at  $100(2)$  and  $300(2)$  K (e). Thermal ellipsoids for the asymmetric unit in (d) are presented at the 50% probability level. Hydrogen atoms in the (a–d) parts were omitted for clarity. Related detailed structural parameters are presented in Table S15.

**Table S15** Detailed crystal structure parameters of **Re<sub>2</sub>-bpb**.

| compound                     | Re <sub>2</sub> -bpb      |                           |                           |                           |                           |                           |
|------------------------------|---------------------------|---------------------------|---------------------------|---------------------------|---------------------------|---------------------------|
|                              | T / K                     | 100(2)                    | 120(2)                    | 140(2)                    | 160(2)                    | 180(2)                    |
| Re1-C / Å                    | 2.101(3) –<br>2.111(3)    | 2.101(3) –<br>2.115(2)    | 2.104(3) –<br>2.113(3)    | 2.099(4) –<br>2.113(4)    | 2.097(4) –<br>2.110(4)    | 2.100(3) –<br>2.112(3)    |
| Re1≡N1 / Å                   | 1.656(3)                  | 1.660(2)                  | 1.659(2)                  | 1.657(3)                  | 1.656(3)                  | 1.657(3)                  |
| Re1-N6 / Å                   | 2.487(2)                  | 2.4891(19)                | 2.4912(19)                | 2.491(2)                  | 2.494(2)                  | 2.497(2)                  |
| C-Re1-C ( <i>cis</i> ) / °   | 84.32(11) –<br>90.84(11)  | 84.43(9) –<br>90.77(9)    | 84.44(9) –<br>90.71(9)    | 84.53(13) –<br>90.80(13)  | 84.70(13) –<br>90.85(13)  | 84.93(11) –<br>90.58(11)  |
| C-Re1-C ( <i>trans</i> ) / ° | 158.01(11),<br>158.51(11) | 158.00(9),<br>158.46(9)   | 157.97(10),<br>158.60(9)  | 158.30(13),<br>158.61(12) | 158.31(13),<br>158.74(13) | 158.37(12),<br>158.80(11) |
| N1≡Re1-C / °                 | 99.86(12) –<br>101.69(12) | 99.88(10) –<br>101.65(10) | 99.79(10) –<br>101.49(11) | 99.83(14) –<br>101.62(14) | 99.72(15) –<br>101.54(15) | 99.77(13) –<br>101.43(13) |
| N1≡Re1-N6 / °                | 177.57(11)                | 177.53(8)                 | 177.53(9)                 | 177.60(13)                | 177.60(14)                | 177.56(11)                |
| Re1-(L)-Re1 / Å              | 16.299(5)                 | 16.303(3)                 | 16.311(3)                 | 16.307(5)                 | 16.311(5)                 | 16.316(5)                 |
| T / K                        | 220(2)                    | 240(2)                    | 260(2)                    | –                         | –                         | –                         |
| Re1-C / Å                    | 2.092(4) –<br>2.110(4)    | 2.100(5) –<br>2.113(4)    | 2.095(5) –<br>2.106(5)    | –                         | –                         | –                         |
| Re1≡N1 / Å                   | 1.648(3)                  | 1.650(4)                  | 1.641(4)                  | –                         | –                         | –                         |
| Re1-N6 / Å                   | 2.497(3)                  | 2.498(3)                  | 2.497(3)                  | –                         | –                         | –                         |
| C-Re1-C ( <i>cis</i> ) / °   | 84.72(14) –<br>90.72(14)  | 85.00(15) –<br>90.70(15)  | 85.45(17) –<br>90.58(18)  | –                         | –                         | –                         |
| C-Re1-C ( <i>trans</i> ) / ° | 158.61(15),<br>158.95(14) | 158.65(16),<br>159.29(15) | 158.69(19),<br>159.68(17) | –                         | –                         | –                         |
| N1≡Re1-C / °                 | 99.68(18) –<br>101.61(17) | 99.5(2) –<br>101.70(19)   | 99.0(2) –<br>102.1(2)     | –                         | –                         | –                         |
| N1≡Re1-N6 / °                | 177.55(15)                | 177.50(16)                | 177.20(19)                | –                         | –                         | –                         |
| Re1-(L)-Re1 / Å              | 16.315(6)                 | 16.321(6)                 | 16.325(7)                 | –                         | –                         | –                         |

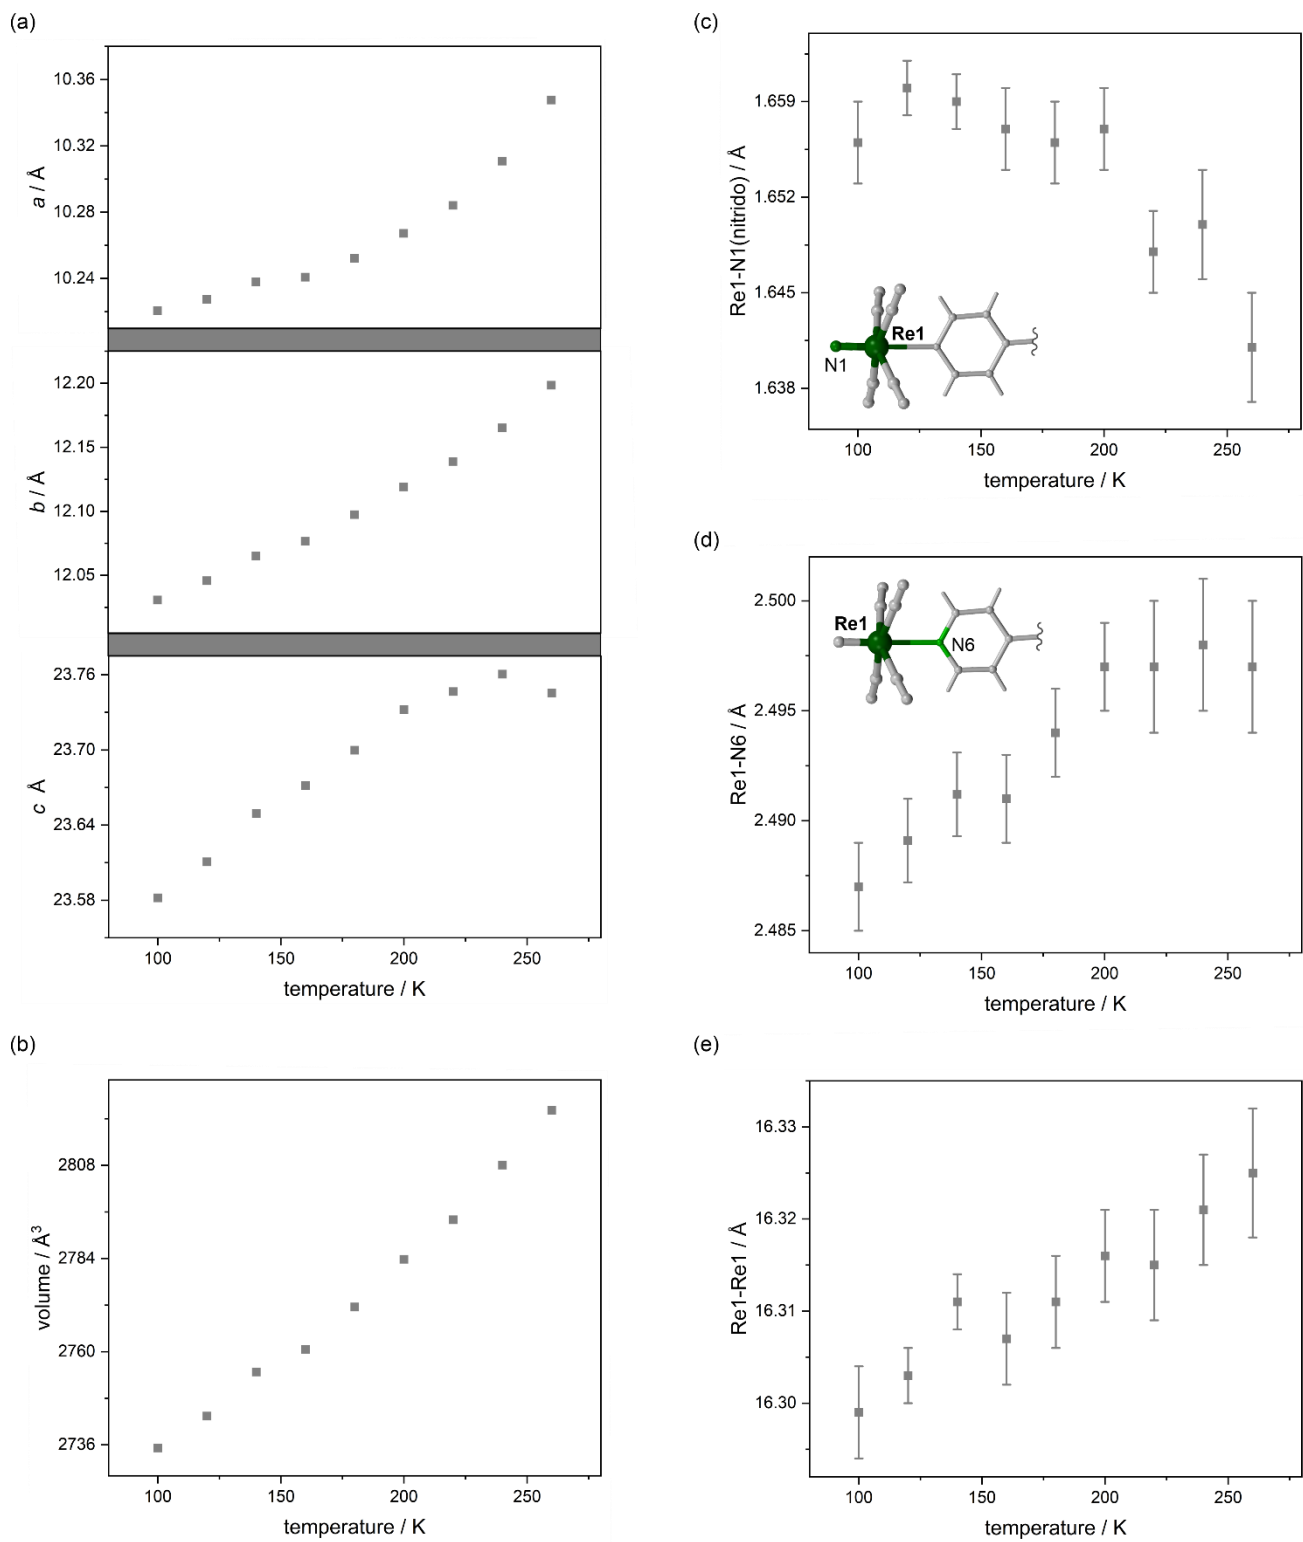

**Fig. S16** The temperature variation of unit cell parameters (a–b), as well as Re≡N(nitrido), Re1–N6, and Re1–Re1 bond lengths (c–e) within bimetallic  $\{\text{Re}_2\}^{4-}$  assemblies in the crystal structure of **Re<sub>2</sub>-bpb**.



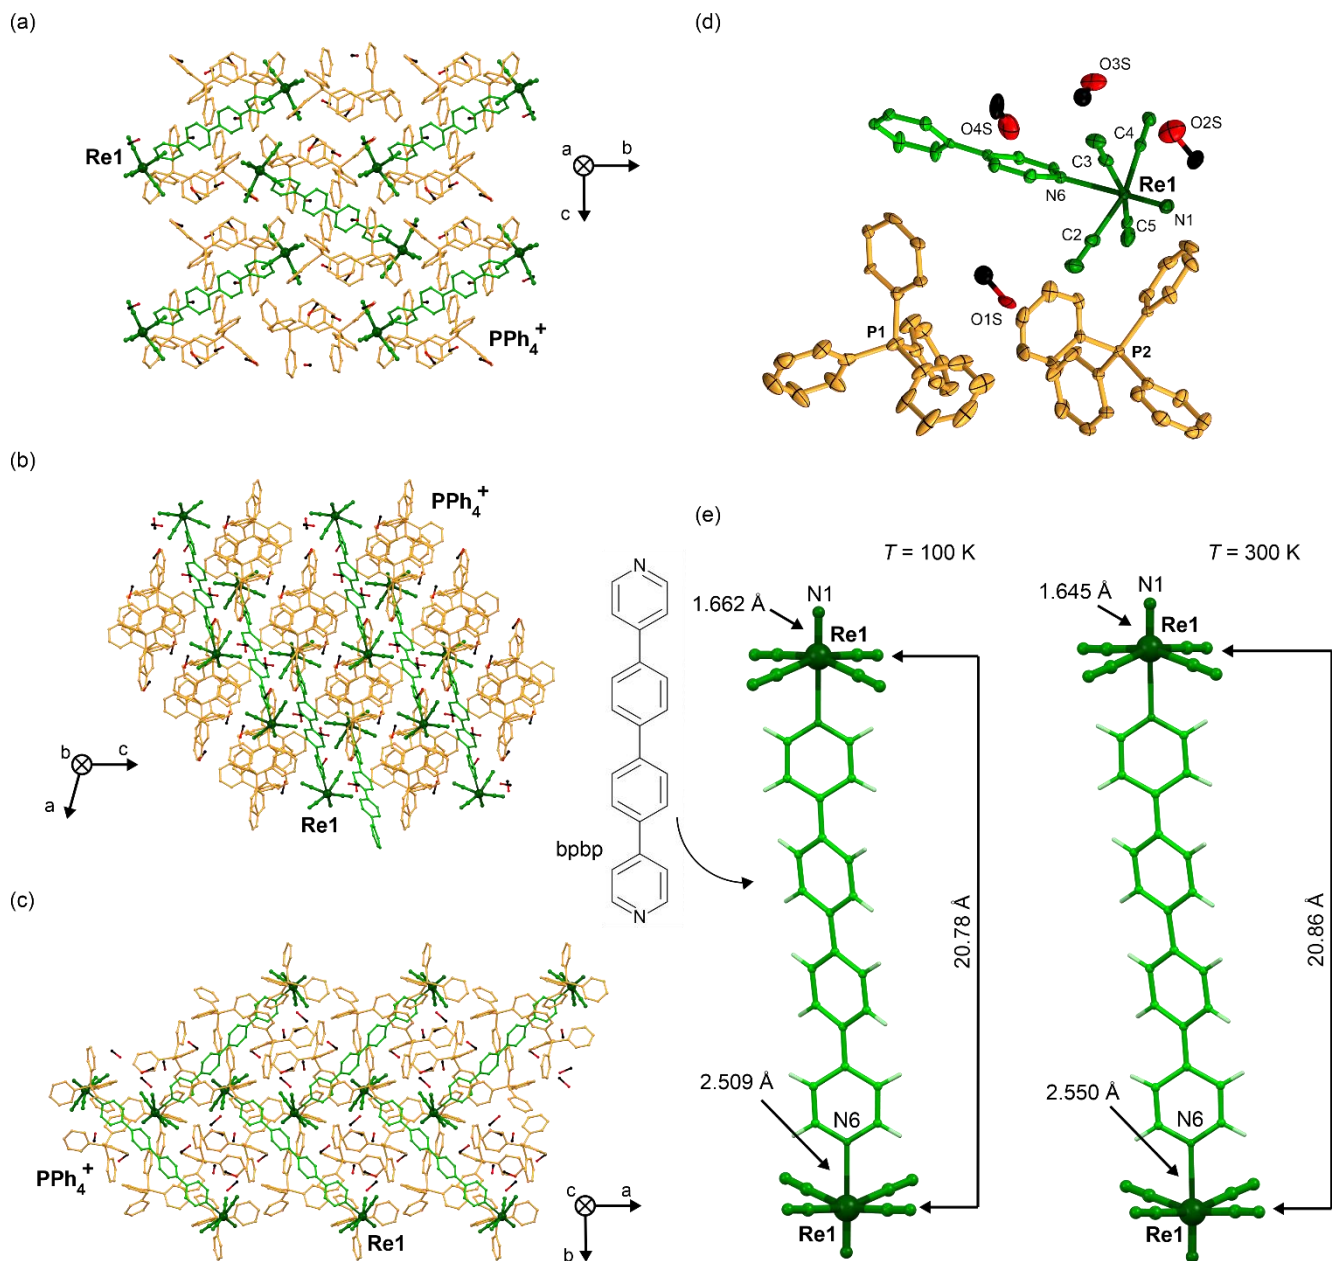

**Fig. S17** Detailed structural views of  $\text{Re}_2\text{-bpbp}$  material: the crystal structure presented along the main  $a$ ,  $b$ , and  $c$  crystallographic axes ( $a$ ,  $b$ , and  $c$ , respectively), the asymmetric unit with the labeling scheme for selected symmetrically independent atoms (d), and the comparison of the metric parameters of bimetallic  $\{\text{Re}_2\}^{4+}$  assemblies at  $100(2)$  and  $300(2)$  K (e). Thermal ellipsoids for the asymmetric unit in (d) are presented at the 50% probability level. Hydrogen atoms in the (a–d) parts were omitted for clarity. Related detailed structural parameters are presented in Table S16.

**Table S16** Detailed crystal structure parameters of **Re<sub>2</sub>-bpbp**.

| compound                     | Re <sub>2</sub> -bpbp  |                        |                        |                        |                        |                        |
|------------------------------|------------------------|------------------------|------------------------|------------------------|------------------------|------------------------|
|                              | T / K                  | 100(2)                 | 120(2)                 | 140(2)                 | 160(2)                 | 180(2)                 |
| Re1-C / Å                    | 2.098(5) – 2.112(5)    | 2.102(4) – 2.113(4)    | 2.096(5) – 2.110(5)    | 2.102(5) – 2.111(5)    | 2.102(5) – 2.109(5)    | 2.099(5) – 2.109(5)    |
| Re1≡N1 / Å                   | 1.662(4)               | 1.658(3)               | 1.659(4)               | 1.657(4)               | 1.658(4)               | 1.654(4)               |
| Re1-N6 / Å                   | 2.509(3)               | 2.512(3)               | 2.515(3)               | 2.523(3)               | 2.524(3)               | 2.527(3)               |
| C-Re1-C ( <i>cis</i> ) / °   | 86.33(17) – 90.96(18)  | 86.59(16) – 91.01(17)  | 86.65(17) – 91.09(18)  | 86.45(17) – 91.03(18)  | 86.54(17) – 91.07(18)  | 87.05(18) – 90.96(18)  |
| C-Re1-C ( <i>trans</i> ) / ° | 161.47(17), 162.32(17) | 161.53(16), 162.43(16) | 161.47(17), 162.31(17) | 161.46(17), 162.52(17) | 161.62(17), 162.51(17) | 161.69(17), 162.79(17) |
| N1≡Re1-C / °                 | 98.27(18) – 99.36(18)  | 98.18(17) – 99.36(17)  | 98.32(18) – 99.34(18)  | 98.11(18) – 99.46(18)  | 97.97(18) – 99.48(18)  | 97.84(18) – 99.35(18)  |
| N1≡Re1-N6 / °                | 179.10(16)             | 178.84(15)             | 178.78(15)             | 179.06(15)             | 178.99(16)             | 178.65(16)             |
| Re1-(L)-Re1 / Å              | 20.776(8)              | 20.781(8)              | 20.786(8)              | 20.793(8)              | 20.800(8)              | 20.808(8)              |
| T / K                        | 220(2)                 | 240(2)                 | 260(2)                 | 280(2)                 | 300(2)                 | –                      |
| Re1-C / Å                    | 2.098(5) – 2.112(5)    | 2.101(5) – 2.115(5)    | 2.098(6) – 2.112(6)    | 2.097(6) – 2.118(6)    | 2.098(7) – 2.116(8)    | –                      |
| Re1≡N1 / Å                   | 1.650(4)               | 1.656(4)               | 1.653(4)               | 1.651(4)               | 1.646(5)               | –                      |
| Re1-N6 / Å                   | 2.527(3)               | 2.530(3)               | 2.536(3)               | 2.547(4)               | 2.550(4)               | –                      |
| C-Re1-C ( <i>cis</i> ) / °   | 87.08(19) – 91.02(19)  | 87.0(2) – 91.0(2)      | 86.8(2) – 91.0(2)      | 86.8(2) – 91.0(2)      | 86.5(2) – 90.9(3)      | –                      |
| C-Re1-C ( <i>trans</i> ) / ° | 161.56(17), 162.75(17) | 161.73(18), 162.70(18) | 161.72(19), 162.73(19) | 161.7(2), 163.0(2)     | 161.7(2), 162.9(2)     | –                      |
| N1≡Re1-C / °                 | 98.14(19) – 99.16(19)  | 98.0(2) – 99.3(2)      | 97.9(2) – 99.4(2)      | 98.1(2) – 99.2(2)      | 97.6(3) – 99.5(3)      | –                      |
| N1≡Re1-N6 / °                | 178.63(16)             | 178.65(17)             | 178.13(17)             | 178.32(18)             | 177.9(2)               | –                      |
| Re1-(L)-Re1 / Å              | 20.815(9)              | 20.826(9)              | 20.834(9)              | 20.847(9)              | 20.857(12)             | –                      |

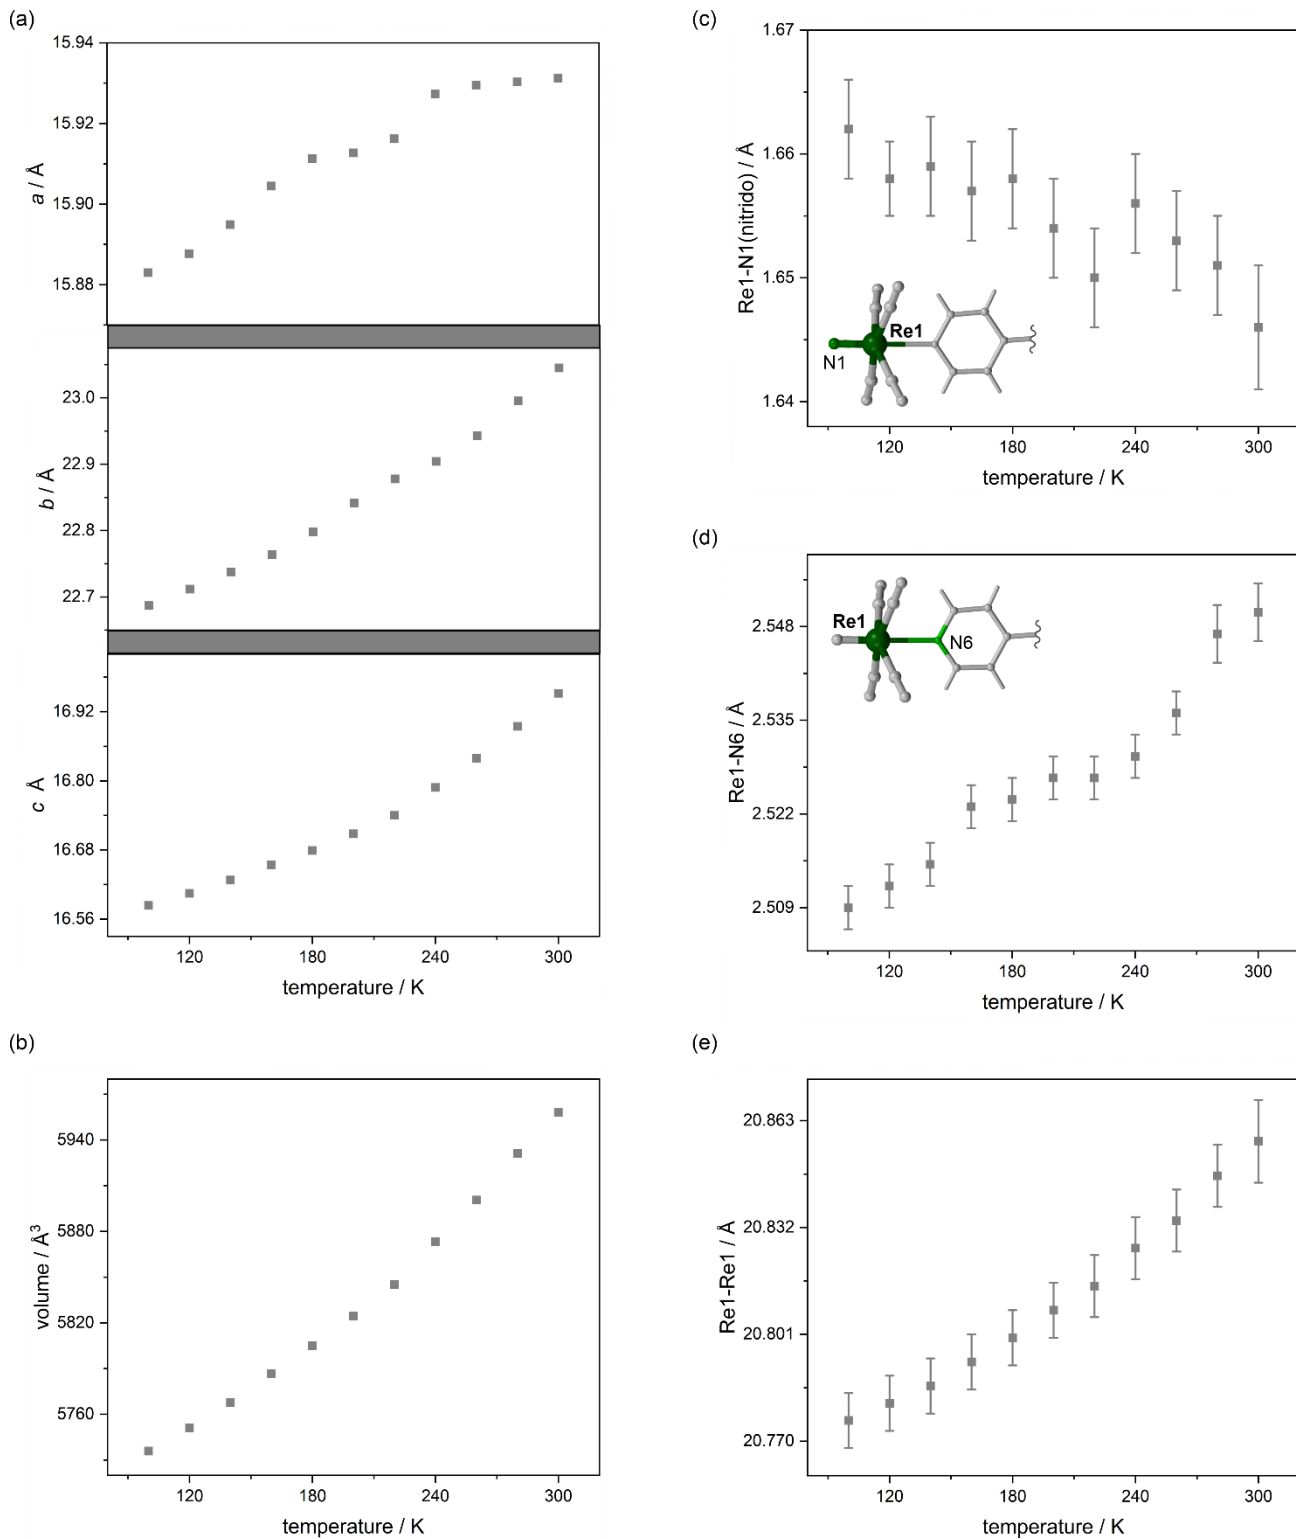

**Fig. S18** The temperature variation of unit cell parameters (a–b), as well as  $\text{Re}\equiv\text{N(nitrido)}$ ,  $\text{Re1-N6}$ , and  $\text{Re1-Re1}$  bond lengths (c–e) within bimetallic  $\{\text{ReV}_2\}^{4-}$  assemblies in the crystal structure of **Re<sub>2</sub>-bpbp**.

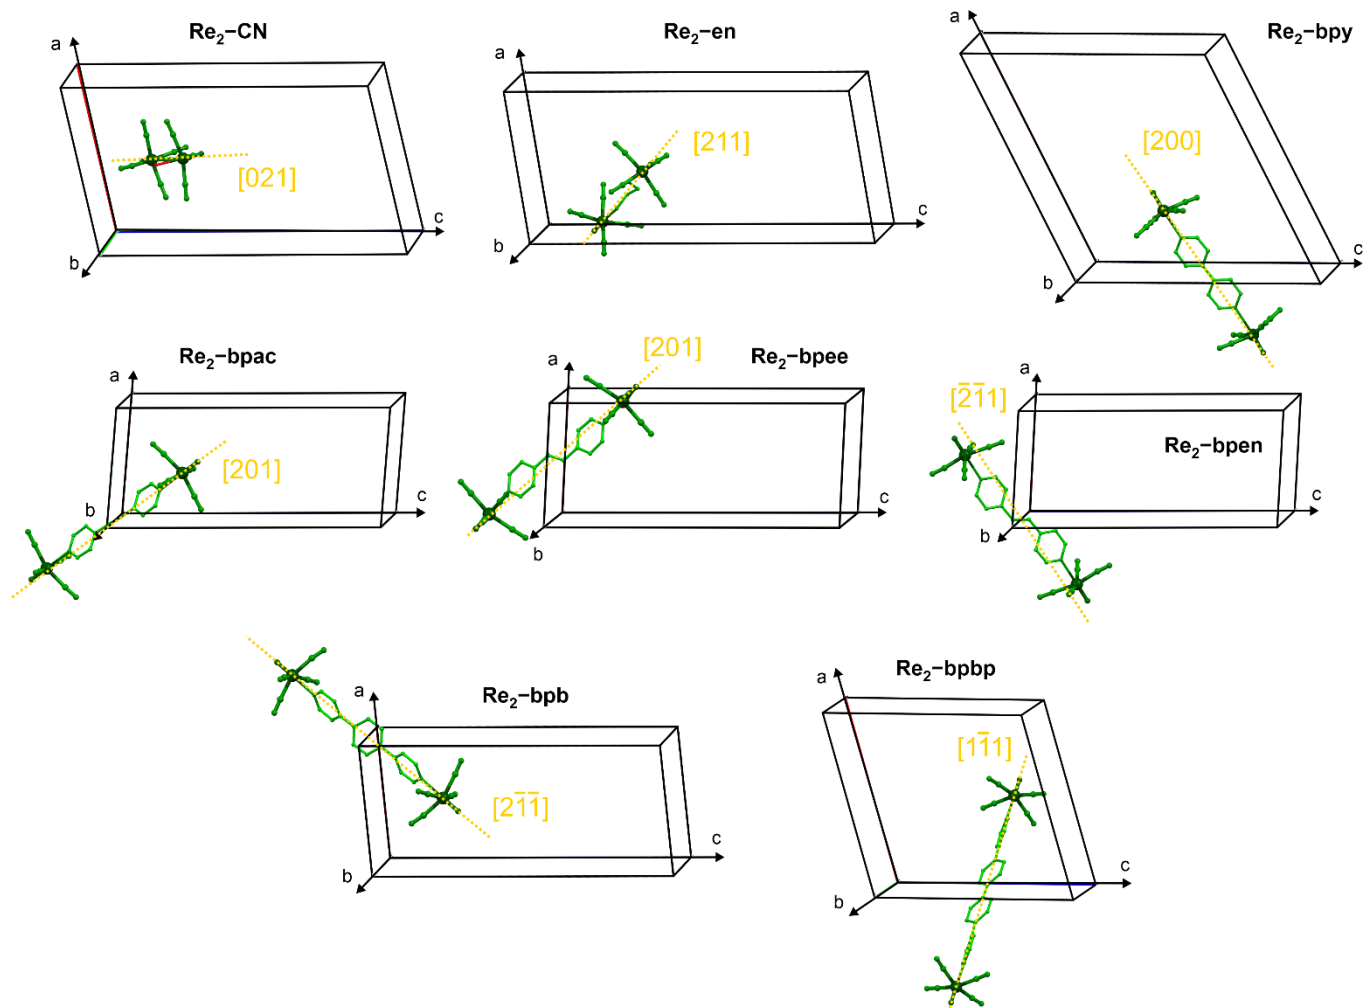

**Fig. S19** Orientation of dinuclear  $\{\text{Re}_2\}^{4-}$  molecular anions in the unit cell of the indicated crystal structures of **Re<sub>2</sub>-CN**, **Re<sub>2</sub>-en**, **Re<sub>2</sub>-bpy**, **Re<sub>2</sub>-bpac**, **Re<sub>2</sub>-bpee**, **Re<sub>2</sub>-bpen**, **Re<sub>2</sub>-bpb**, and **Re<sub>2</sub>-bpbp** materials. The crystallographic directions corresponding to the axis given by the Re–Re connection within the  $\{\text{Re}_2\}^{4-}$  molecular anions were presented in the figure.

**Table S17** Results of Continuous Shape Measure analysis for rhenium(V) complexes in **Re<sub>2</sub>-CN**.<sup>a</sup>

| T / K  | Continuous Shape Measure parameters for [Re <sup>V</sup> (CN) <sub>4</sub> (N)(H <sub>2</sub> O)] <sup>2-</sup> complexes in <b>Re<sub>2</sub>-CN</b> |              |        |
|--------|-------------------------------------------------------------------------------------------------------------------------------------------------------|--------------|--------|
|        | PPY-6                                                                                                                                                 | OC-6         | TPR-6  |
| 100(2) | 28.854                                                                                                                                                | <b>0.471</b> | 15.507 |
| 120(2) | 28.828                                                                                                                                                | <b>0.470</b> | 15.534 |
| 140(2) | 28.742                                                                                                                                                | <b>0.467</b> | 15.441 |
| 160(2) | 28.793                                                                                                                                                | <b>0.468</b> | 15.528 |
| 180(2) | 28.780                                                                                                                                                | <b>0.466</b> | 15.557 |
| 200(2) | 28.826                                                                                                                                                | <b>0.461</b> | 15.612 |
| 220(2) | 28.807                                                                                                                                                | <b>0.465</b> | 15.713 |
| 240(2) | 28.885                                                                                                                                                | <b>0.462</b> | 15.700 |
| 260(2) | 28.827                                                                                                                                                | <b>0.475</b> | 15.649 |
| 280(2) | 28.893                                                                                                                                                | <b>0.490</b> | 15.728 |
| 300(2) | 29.244                                                                                                                                                | <b>0.506</b> | 16.037 |
| T / K  | Continuous Shape Measure parameters for [Re <sup>2V</sup> (CN) <sub>4</sub> (N)(μ-NC)] <sup>2-</sup> complexes in <b>Re<sub>2</sub>-CN</b>            |              |        |
|        | PPY-6                                                                                                                                                 | OC-6         | TPR-6  |
| 100(2) | 28.391                                                                                                                                                | <b>0.510</b> | 15.281 |
| 120(2) | 28.501                                                                                                                                                | <b>0.507</b> | 15.304 |
| 140(2) | 28.336                                                                                                                                                | <b>0.514</b> | 15.327 |
| 160(2) | 28.481                                                                                                                                                | <b>0.508</b> | 15.261 |
| 180(2) | 28.654                                                                                                                                                | <b>0.506</b> | 15.262 |
| 200(2) | 28.728                                                                                                                                                | <b>0.508</b> | 15.339 |
| 220(2) | 28.677                                                                                                                                                | <b>0.493</b> | 15.416 |
| 240(2) | 28.694                                                                                                                                                | <b>0.480</b> | 15.507 |
| 260(2) | 28.693                                                                                                                                                | <b>0.501</b> | 15.467 |
| 280(2) | 28.829                                                                                                                                                | <b>0.487</b> | 15.558 |
| 300(2) | 28.822                                                                                                                                                | <b>0.491</b> | 15.830 |

<sup>a</sup>For details see the comment below Fig. S20.

**Table S18** Results of Continuous Shape Measure analysis for rhenium(V) complexes in **Re<sub>2</sub>-en**.<sup>a</sup>

| T / K  | Continuous Shape Measure parameters for [Re <sup>I</sup> (CN) <sub>4</sub> (N)(en)] <sup>2-</sup> complexes in <b>Re<sub>2</sub>-en</b>  |              |        |
|--------|------------------------------------------------------------------------------------------------------------------------------------------|--------------|--------|
|        | PPY-6                                                                                                                                    | OC-6         | TPR-6  |
| 100(2) | 29.059                                                                                                                                   | <b>0.591</b> | 16.218 |
| 120(2) | 29.064                                                                                                                                   | <b>0.592</b> | 16.186 |
| 140(2) | 29.045                                                                                                                                   | <b>0.590</b> | 16.178 |
| 160(2) | 29.031                                                                                                                                   | <b>0.589</b> | 16.192 |
| 180(2) | 29.053                                                                                                                                   | <b>0.590</b> | 16.165 |
| 200(2) | 28.99                                                                                                                                    | <b>0.593</b> | 16.199 |
| 220(2) | 28.993                                                                                                                                   | <b>0.592</b> | 16.121 |
| 240(2) | 29.088                                                                                                                                   | <b>0.594</b> | 16.232 |
| 260(2) | 29.077                                                                                                                                   | <b>0.596</b> | 16.215 |
| 280(2) | 29.038                                                                                                                                   | <b>0.597</b> | 16.251 |
| 300(2) | 29.041                                                                                                                                   | <b>0.598</b> | 16.249 |
| T / K  | Continuous Shape Measure parameters for [Re <sup>II</sup> (CN) <sub>4</sub> (N)(en)] <sup>2-</sup> complexes in <b>Re<sub>2</sub>-en</b> |              |        |
|        | PPY-6                                                                                                                                    | OC-6         | TPR-6  |
| 100(2) | 28.841                                                                                                                                   | <b>0.578</b> | 15.582 |
| 120(2) | 28.833                                                                                                                                   | <b>0.579</b> | 15.601 |
| 140(2) | 28.884                                                                                                                                   | <b>0.580</b> | 15.534 |
| 160(2) | 28.868                                                                                                                                   | <b>0.580</b> | 15.551 |
| 180(2) | 28.924                                                                                                                                   | <b>0.579</b> | 15.55  |
| 200(2) | 28.929                                                                                                                                   | <b>0.580</b> | 15.589 |
| 220(2) | 28.989                                                                                                                                   | <b>0.579</b> | 15.542 |
| 240(2) | 28.947                                                                                                                                   | <b>0.577</b> | 15.561 |
| 260(2) | 29.032                                                                                                                                   | <b>0.576</b> | 15.554 |
| 280(2) | 29.054                                                                                                                                   | <b>0.576</b> | 15.575 |
| 300(2) | 29.049                                                                                                                                   | <b>0.575</b> | 15.573 |

<sup>a</sup>For details see the comment below Fig. S20.

**Table S19** Results of Continuous Shape Measure analysis for rhenium(V) complexes in **Re<sub>2</sub>-bpy**.<sup>a</sup>

| T / K  | Continuous Shape Measure parameters for [Re <sup>I</sup> (CN) <sub>4</sub> (N)(bpy)] <sup>2-</sup> complexes in <b>Re<sub>2</sub>-bpy</b> |              |        |
|--------|-------------------------------------------------------------------------------------------------------------------------------------------|--------------|--------|
|        | PPY-6                                                                                                                                     | OC-6         | TPR-6  |
| 100(2) | 29.025                                                                                                                                    | <b>0.620</b> | 16.201 |
| 120(2) | 29.059                                                                                                                                    | <b>0.616</b> | 16.158 |
| 140(2) | 29.103                                                                                                                                    | <b>0.617</b> | 16.204 |
| 160(2) | 29.064                                                                                                                                    | <b>0.629</b> | 16.171 |
| 180(2) | 29.117                                                                                                                                    | <b>0.639</b> | 16.196 |
| 200(2) | 29.124                                                                                                                                    | <b>0.635</b> | 16.133 |
| 220(2) | 29.111                                                                                                                                    | <b>0.645</b> | 16.130 |
| 240(2) | 29.212                                                                                                                                    | <b>0.642</b> | 16.206 |
| 260(2) | 29.231                                                                                                                                    | <b>0.650</b> | 16.169 |
| 280(2) | 29.245                                                                                                                                    | <b>0.663</b> | 16.223 |
| 300(2) | 29.270                                                                                                                                    | <b>0.673</b> | 16.254 |

<sup>a</sup>For details see the comment below Fig. S20.**Table S20** Results of Continuous Shape Measure analysis for rhenium(V) complexes in **Re<sub>2</sub>-bpac**.<sup>a</sup>

| T / K  | Continuous Shape Measure parameters for [Re <sup>I</sup> (CN) <sub>4</sub> (N)(bpac)] <sup>2-</sup> complexes in <b>Re<sub>2</sub>-bpac</b> |              |        |
|--------|---------------------------------------------------------------------------------------------------------------------------------------------|--------------|--------|
|        | PPY-6                                                                                                                                       | OC-6         | TPR-6  |
| 100(2) | 29.281                                                                                                                                      | <b>0.568</b> | 16.551 |
| 120(2) | 29.348                                                                                                                                      | <b>0.570</b> | 16.574 |
| 140(2) | 29.366                                                                                                                                      | <b>0.568</b> | 16.507 |
| 160(2) | 29.366                                                                                                                                      | <b>0.571</b> | 16.574 |
| 180(2) | 29.411                                                                                                                                      | <b>0.573</b> | 16.603 |
| 200(2) | 29.403                                                                                                                                      | <b>0.576</b> | 16.582 |
| 220(2) | 29.378                                                                                                                                      | <b>0.579</b> | 16.618 |
| 240(2) | 29.456                                                                                                                                      | <b>0.586</b> | 16.634 |
| 260(2) | 29.402                                                                                                                                      | <b>0.582</b> | 16.656 |
| 280(2) | 29.424                                                                                                                                      | <b>0.605</b> | 16.685 |

<sup>a</sup>For details see the comment below Fig. S20.

**Table S21** Results of Continuous Shape Measure analysis for rhenium(V) complexes in **Re<sub>2</sub>-bpee**.<sup>a</sup>

| T / K  | Continuous Shape Measure parameters for [Re <sup>1V</sup> (CN) <sub>4</sub> (N)(bpee)] <sup>2-</sup> complexes in <b>Re<sub>2</sub>-bpee</b> |              |        |
|--------|----------------------------------------------------------------------------------------------------------------------------------------------|--------------|--------|
|        | PPY-6                                                                                                                                        | OC-6         | TPR-6  |
| 100(2) | 29.281                                                                                                                                       | <b>0.568</b> | 16.551 |
| 120(2) | 29.348                                                                                                                                       | <b>0.570</b> | 16.574 |
| 140(2) | 29.366                                                                                                                                       | <b>0.568</b> | 16.507 |
| 160(2) | 29.366                                                                                                                                       | <b>0.571</b> | 16.574 |
| 180(2) | 29.411                                                                                                                                       | <b>0.573</b> | 16.603 |
| 200(2) | 29.403                                                                                                                                       | <b>0.576</b> | 16.582 |
| 220(2) | 29.378                                                                                                                                       | <b>0.579</b> | 16.618 |
| 240(2) | 29.456                                                                                                                                       | <b>0.586</b> | 16.634 |
| 260(2) | 29.402                                                                                                                                       | <b>0.582</b> | 16.656 |
| 280(2) | 29.424                                                                                                                                       | <b>0.605</b> | 16.685 |

<sup>a</sup>For details see the comment below Fig. S20.**Table S22** Results of Continuous Shape Measure<sup>1</sup> analysis for rhenium(V) complexes in **Re<sub>2</sub>-bpen**.<sup>a</sup>

| T / K  | Continuous Shape Measure parameters for [Re <sup>1V</sup> (CN) <sub>4</sub> (N)(bpen)] <sup>2-</sup> complexes in <b>Re<sub>2</sub>-bpen</b> |              |        |
|--------|----------------------------------------------------------------------------------------------------------------------------------------------|--------------|--------|
|        | PPY-6                                                                                                                                        | OC-6         | TPR-6  |
| 100(2) | 29.001                                                                                                                                       | <b>0.504</b> | 15.961 |
| 120(2) | 29.046                                                                                                                                       | <b>0.504</b> | 15.973 |
| 140(2) | 29.077                                                                                                                                       | <b>0.505</b> | 15.991 |
| 160(2) | 29.093                                                                                                                                       | <b>0.504</b> | 16.013 |
| 180(2) | 29.098                                                                                                                                       | <b>0.508</b> | 16.022 |
| 200(2) | 29.121                                                                                                                                       | <b>0.512</b> | 16.008 |
| 220(2) | 29.170                                                                                                                                       | <b>0.513</b> | 16.057 |
| 240(2) | 29.161                                                                                                                                       | <b>0.515</b> | 16.055 |
| 260(2) | 29.197                                                                                                                                       | <b>0.518</b> | 16.094 |
| 280(2) | 29.309                                                                                                                                       | <b>0.522</b> | 16.181 |
| 300(2) | 29.190                                                                                                                                       | <b>0.527</b> | 16.071 |

<sup>a</sup>For details see the comment below Fig. S20.



**Table S23** Results of Continuous Shape Measure analysis for rhenium(V) complexes in **Re<sub>2</sub>-bpb**.<sup>a</sup>

| T / K  | Continuous Shape Measure parameters for [Re <sup>I</sup> (CN) <sub>4</sub> (N)(bpb)] <sup>2-</sup> complexes in <b>Re<sub>2</sub>-bpb</b> |              |        |
|--------|-------------------------------------------------------------------------------------------------------------------------------------------|--------------|--------|
|        | PPY-6                                                                                                                                     | OC-6         | TPR-6  |
| 100(2) | 28.947                                                                                                                                    | <b>0.601</b> | 16.299 |
| 120(2) | 29.003                                                                                                                                    | <b>0.597</b> | 16.274 |
| 140(2) | 28.993                                                                                                                                    | <b>0.596</b> | 16.269 |
| 160(2) | 29.025                                                                                                                                    | <b>0.593</b> | 16.286 |
| 180(2) | 29.061                                                                                                                                    | <b>0.591</b> | 16.309 |
| 200(2) | 29.118                                                                                                                                    | <b>0.586</b> | 16.323 |
| 220(2) | 29.109                                                                                                                                    | <b>0.585</b> | 16.411 |
| 240(2) | 29.059                                                                                                                                    | <b>0.584</b> | 16.332 |
| 260(2) | 28.905                                                                                                                                    | <b>0.583</b> | 16.207 |

<sup>a</sup>For details see the comment below Fig. S20.**Table S24** Results of Continuous Shape Measure<sup>1</sup> analysis for rhenium(V) complexes in **Re<sub>2</sub>-bpbp**.<sup>a</sup>

| T / K  | Continuous Shape Measure parameters for [Re <sup>I</sup> (CN) <sub>4</sub> (N)(bpbp)] <sup>2-</sup> complexes in <b>Re<sub>2</sub>-bpbp</b> |              |        |
|--------|---------------------------------------------------------------------------------------------------------------------------------------------|--------------|--------|
|        | PPY-6                                                                                                                                       | OC-6         | TPR-6  |
| 100(2) | 28.939                                                                                                                                      | <b>0.507</b> | 16.314 |
| 120(2) | 28.878                                                                                                                                      | <b>0.512</b> | 16.277 |
| 140(2) | 28.883                                                                                                                                      | <b>0.514</b> | 16.294 |
| 160(2) | 28.902                                                                                                                                      | <b>0.524</b> | 16.301 |
| 180(2) | 28.814                                                                                                                                      | <b>0.521</b> | 16.227 |
| 200(2) | 28.851                                                                                                                                      | <b>0.525</b> | 16.315 |
| 220(2) | 28.871                                                                                                                                      | <b>0.530</b> | 16.347 |
| 240(2) | 28.871                                                                                                                                      | <b>0.530</b> | 16.347 |
| 260(2) | 28.716                                                                                                                                      | <b>0.538</b> | 16.247 |
| 280(2) | 28.890                                                                                                                                      | <b>0.550</b> | 16.349 |
| 300(2) | 28.789                                                                                                                                      | <b>0.562</b> | 16.293 |

<sup>a</sup>For details see the comment below Fig. S20.

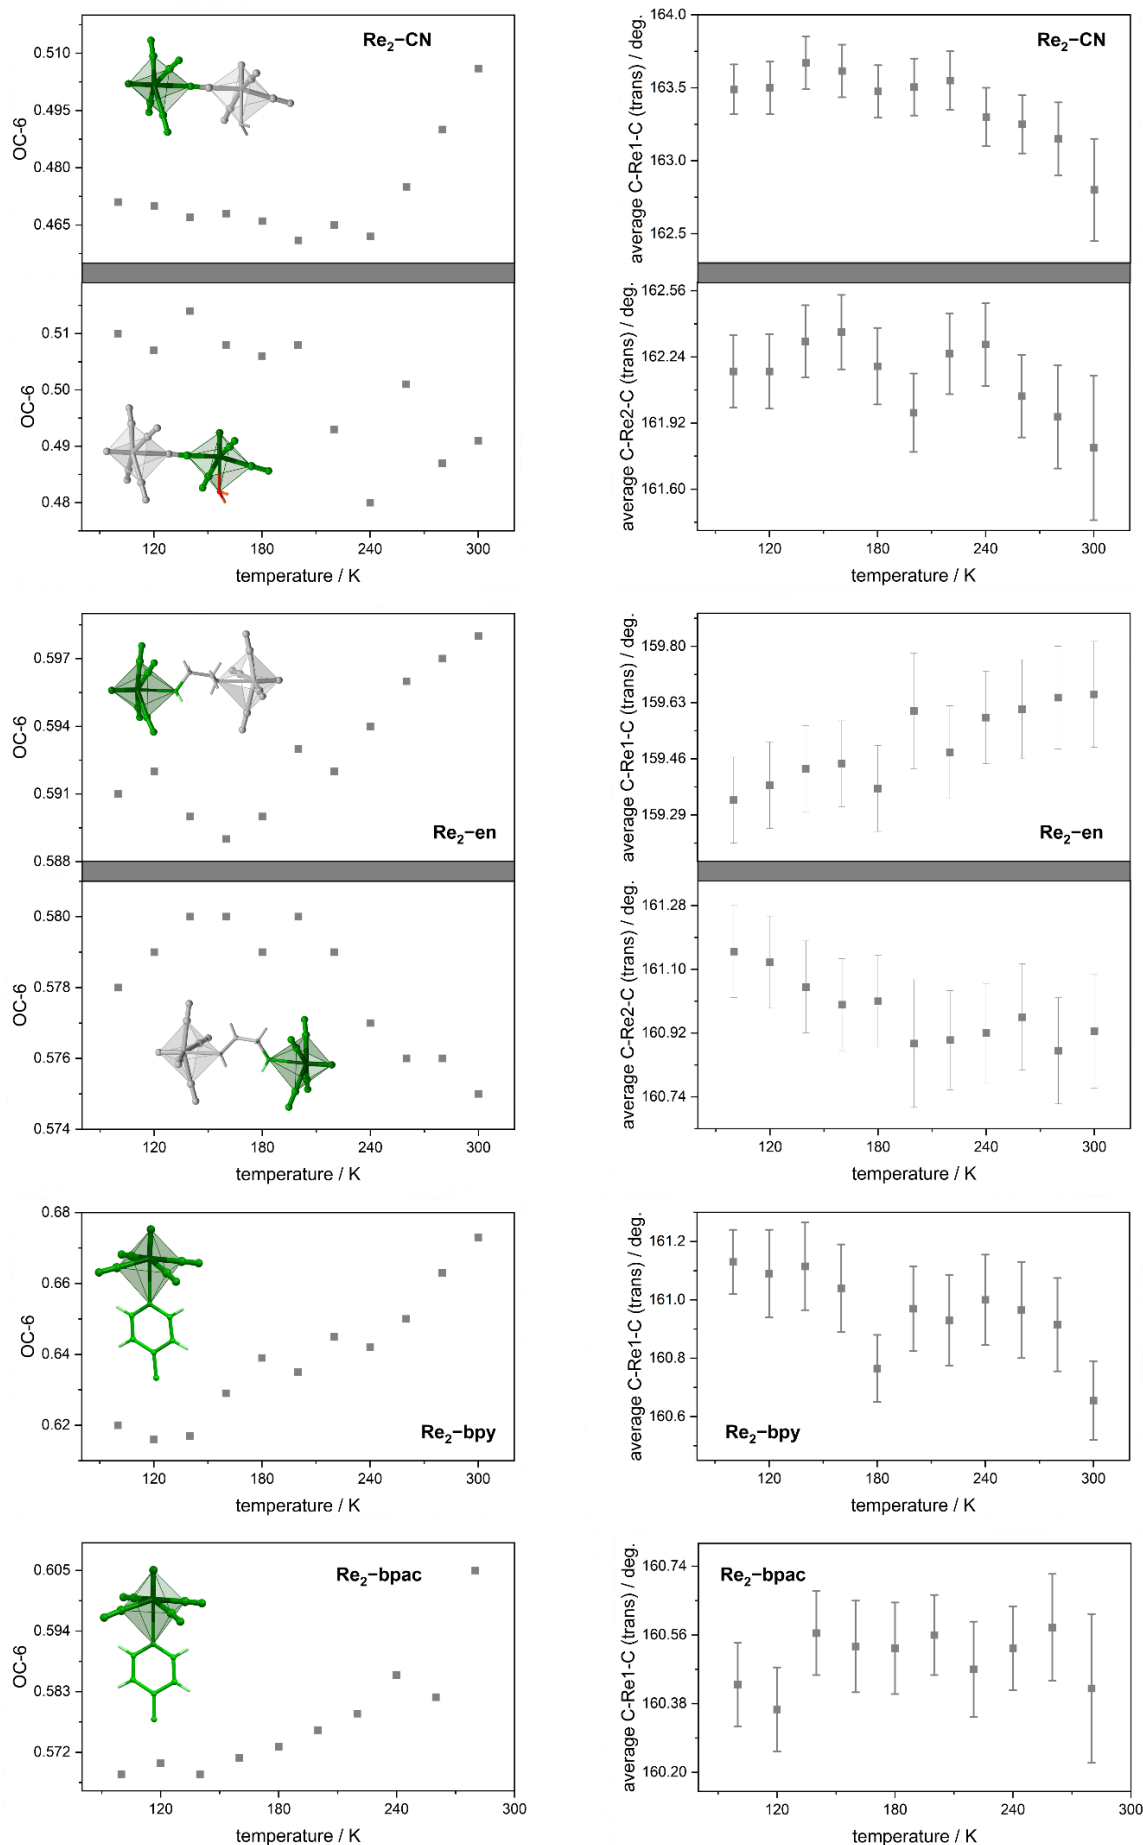

**Fig. S20** Temperature variation of the OC-6 Continuous Shape Measure parameters (which represent the distortion from an ideal octahedral geometry) (a), and an average C-Re-C (*trans*) angle in  $[\text{Re}^{\text{V}}(\text{CN})_4(\text{N})(\text{L})]^{2-}$  complexes in  $\text{Re}_2\text{-CN}$ ,  $\text{Re}_2\text{-en}$ ,  $\text{Re}_2\text{-bpy}$ ,  $\text{Re}_2\text{-bpac}$ ,  $\text{Re}_2\text{-bpee}$ ,  $\text{Re}_2\text{-bpen}$ ,  $\text{Re}_2\text{-bpb}$ , and  $\text{Re}_2\text{-bpbp}$  materials.

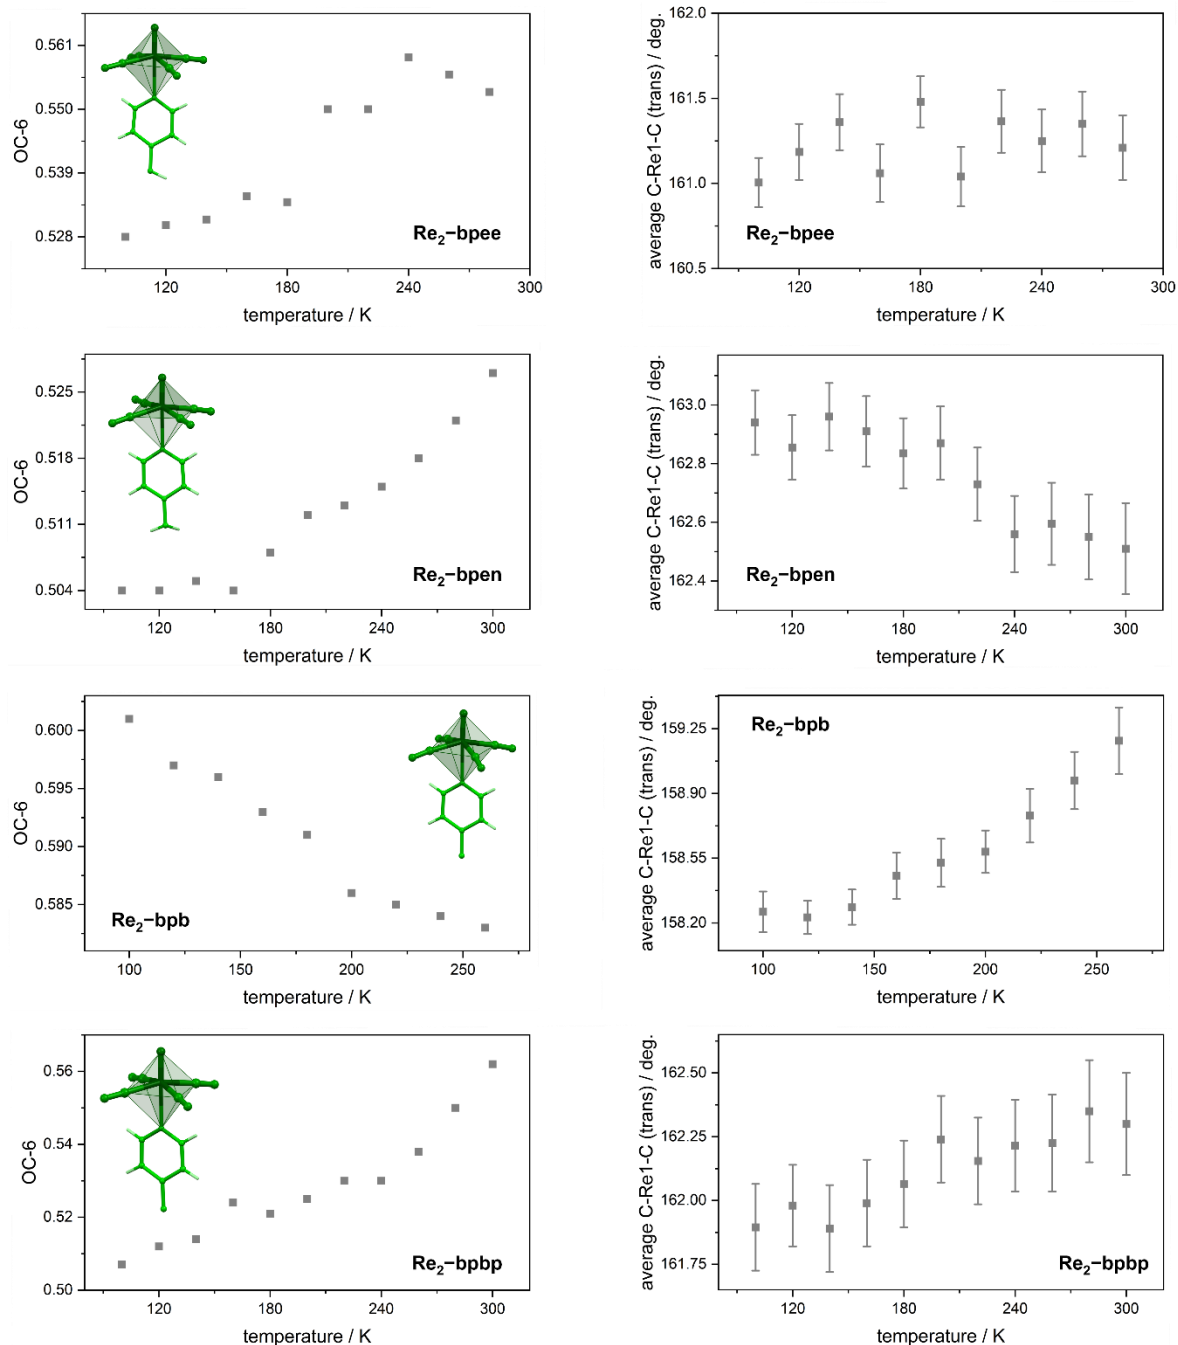

**Fig. S20** (continuation) Temperature variation of the OC-6 Continuous Shape Measure parameters (which represent the distortion from an ideal octahedral geometry) (a), and an average C–Re–C (*trans*) angle in  $[\text{Re}^{\text{V}}(\text{CN})_4(\text{N})(\text{L})]^{2-}$  complexes in **Re<sub>2</sub>–CN**, **Re<sub>2</sub>–en**, **Re<sub>2</sub>–bpy**, **Re<sub>2</sub>–bpac**, **Re<sub>2</sub>–bpee**, **Re<sub>2</sub>–bpen**, **Re<sub>2</sub>–bpb**, and **Re<sub>2</sub>–bpbp** materials.

**Comment to Fig. S20 and Tables S17–S24:** The Continuous Shape Measure (CShM) parameter represents the distortion from an ideal geometry of the investigated metal complex. It equals 0 for an ideal polyhedron and increases with the increasing distortion.<sup>S3,S4</sup>

The CShM parameters for six-coordinated complexes are as follows:<sup>S3,S4</sup>

- CShM PPY-6 - the parameter related to the pentagonal pyramid ( $C_{5v}$  symmetry)
- CShM OC-6 - the parameter related to the octahedron ( $O_h$ )
- CShM TPR-6 - the parameter related to the trigonal prism ( $D_{3h}$ ).

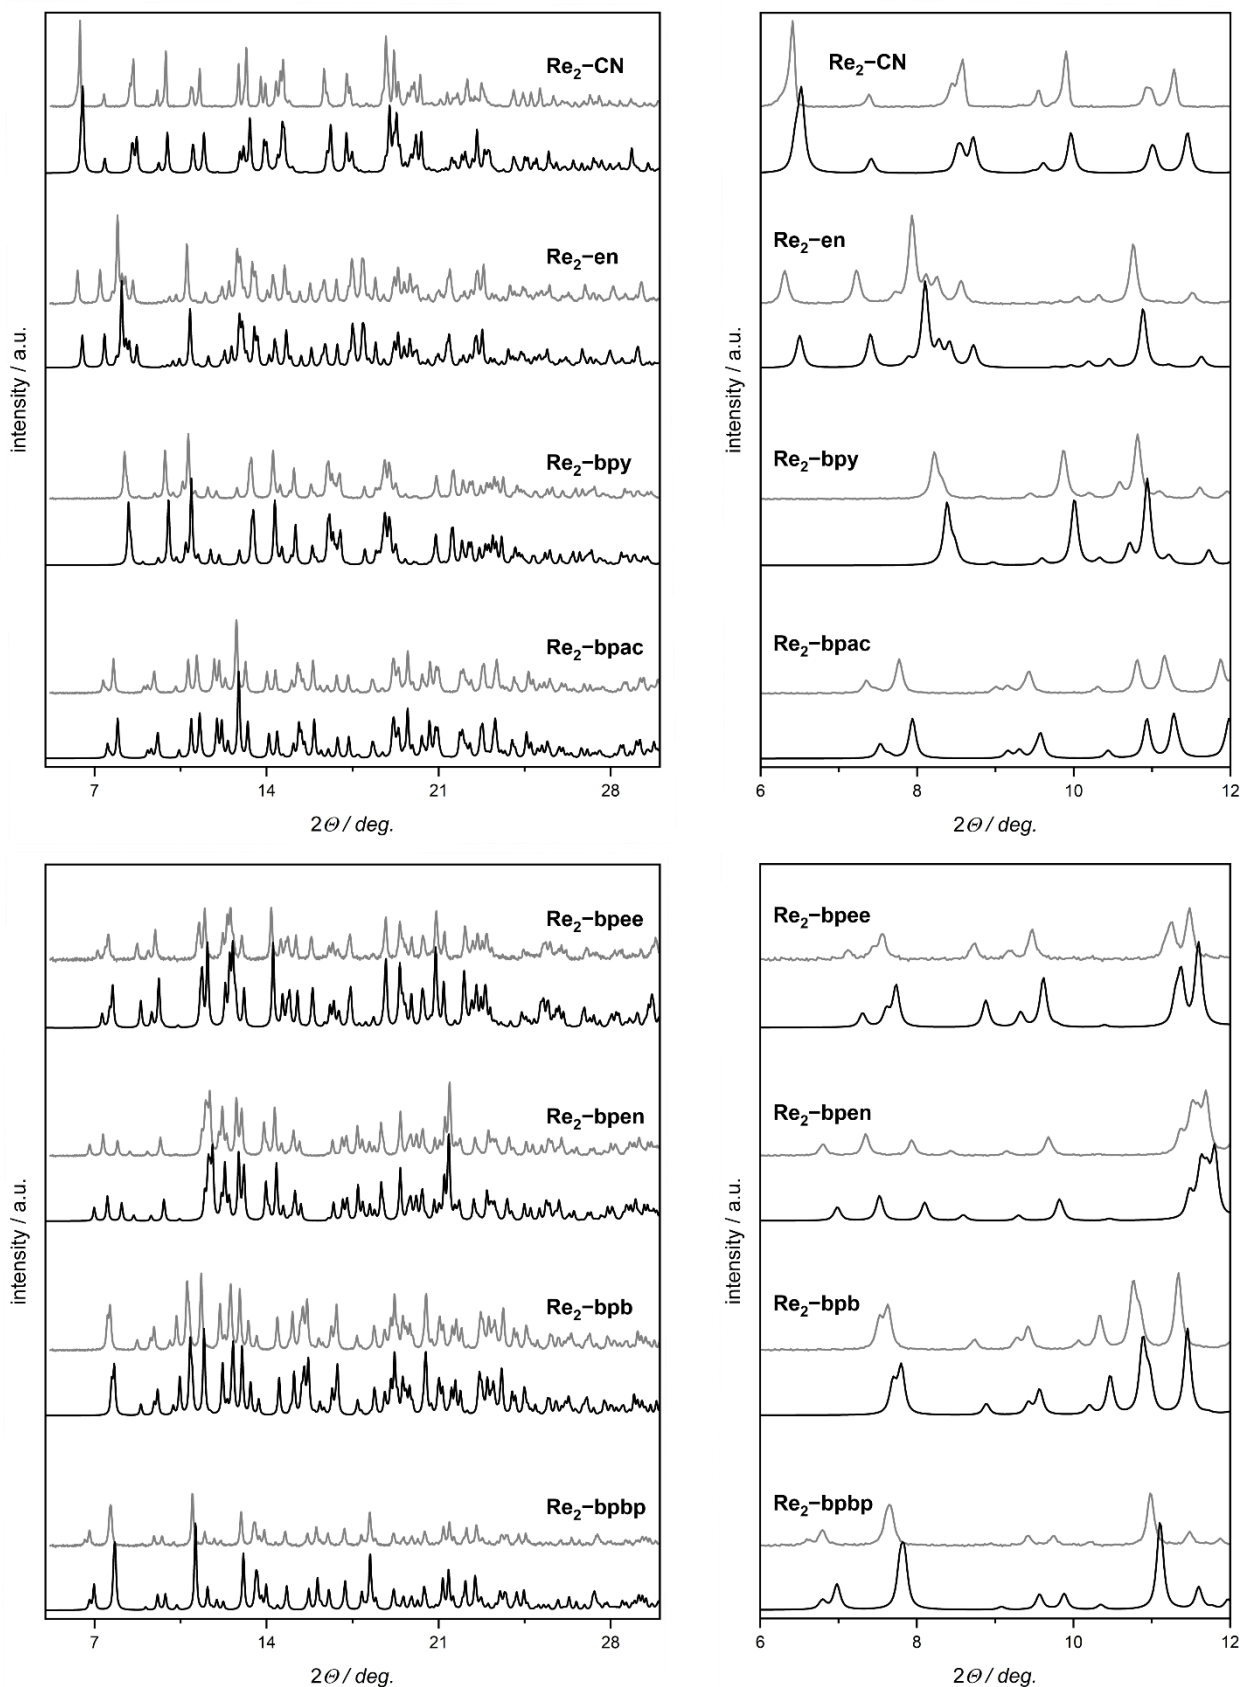

**Fig. S21** Comparison of experimental and calculated powder X-ray diffraction (P-XRD) patterns of **Re<sub>2</sub>-CN**, **Re<sub>2</sub>-en**, **Re<sub>2</sub>-bpy**, **Re<sub>2</sub>-bpac**, **Re<sub>2</sub>-bpee**, **Re<sub>2</sub>-bpen**, **Re<sub>2</sub>-bpb**, and **Re<sub>2</sub>-bpbp** in the broad  $2\theta$  range of  $5\text{--}30^\circ$  (left panel) and the limited low-angle region of  $6\text{--}12^\circ$  (right panel). Experimental data (gray lines), which were gathered at  $T = 300(2)$  K, were compared with the patterns calculated from the respective structural models obtained from the single-crystal X-ray diffraction (SC-XRD) structural analyses performed at  $100(2)$  K (black lines) which explains the general thermal shift between these P-XRD patterns.

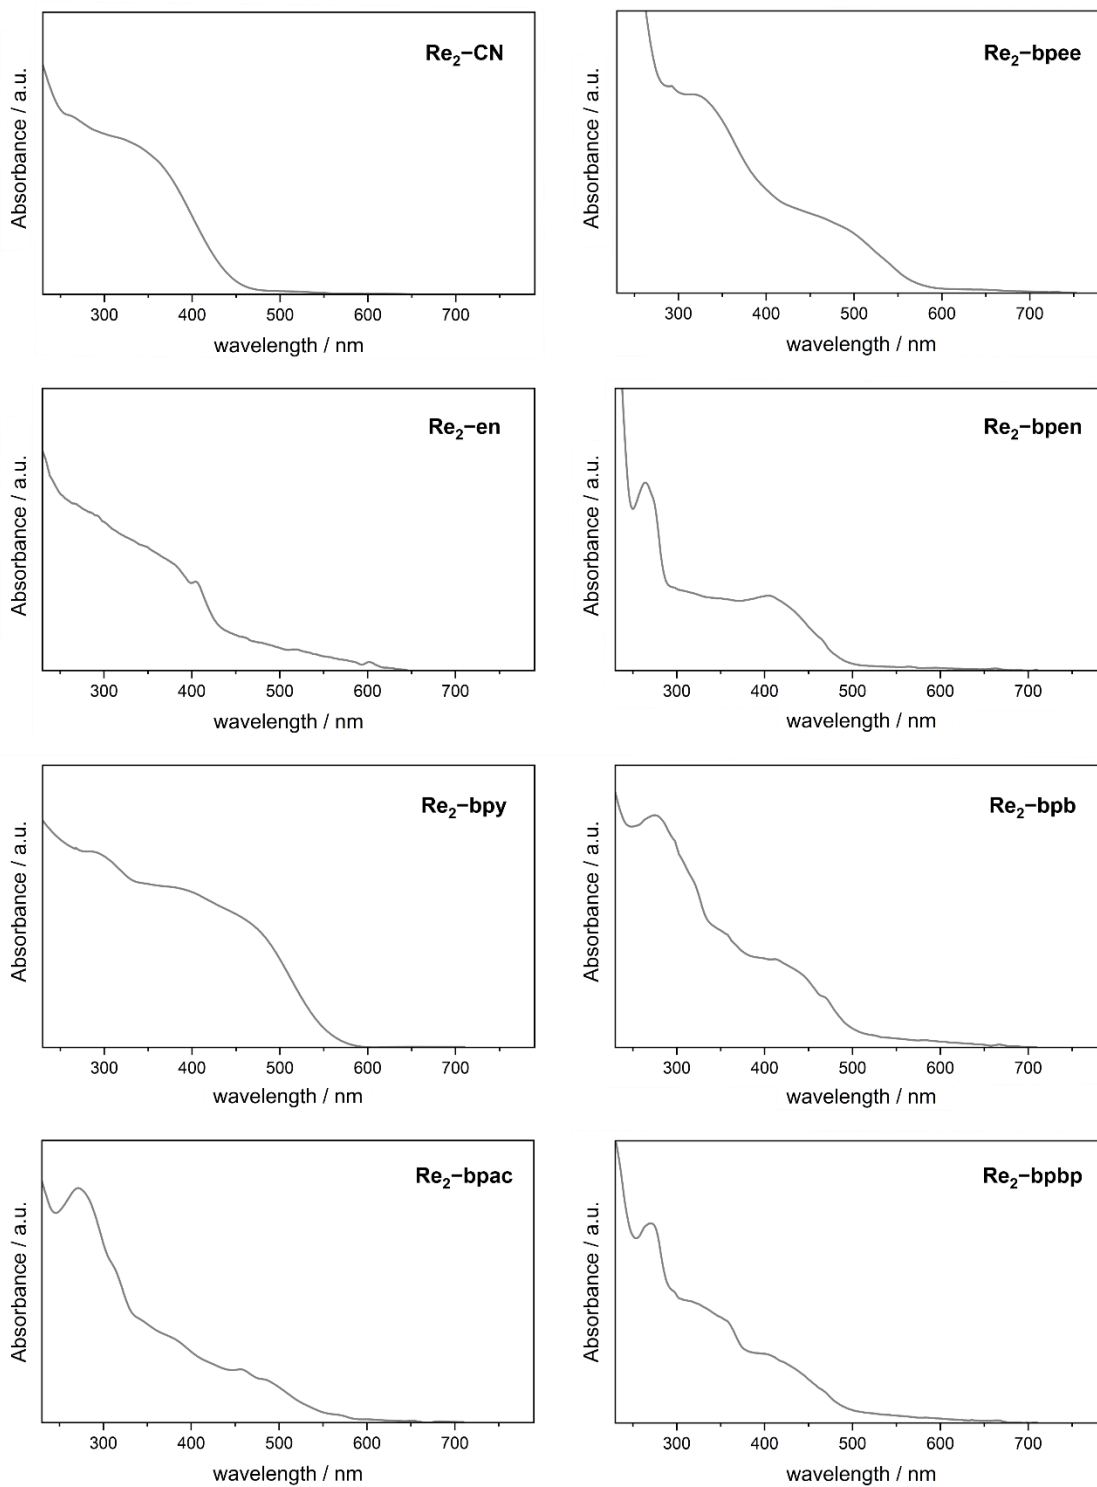

**Fig. S22** Solid-state room-temperature UV-vis absorption spectra of **Re<sub>2</sub>-CN**, **Re<sub>2</sub>-en**, **Re<sub>2</sub>-bpy**, **Re<sub>2</sub>-bpac**, **Re<sub>2</sub>-bpee**, **Re<sub>2</sub>-bpen**, **Re<sub>2</sub>-bpb**, and **Re<sub>2</sub>-bpbp** materials, presented in the 230–790 nm range.

**Table S25** Crystal data, structure refinement, and detailed crystal structure parameters of the reference compound **Re-en**, containing mononuclear Re(V) complexes (see Fig. S23).

| crystal data and structure refinement parameters |                                         |                                                 |                        |
|--------------------------------------------------|-----------------------------------------|-------------------------------------------------|------------------------|
| formula                                          | $C_{34}H_{45}N_{11}P_1Re_1$             | $Z$                                             | 2                      |
| formula weight / $g \cdot mol^{-1}$              | 824.99                                  | calcd. density / $g \cdot cm^{-3}$              | 1.528                  |
| $\lambda / \text{\AA}$                           | 0.71073 $\text{\AA}$<br>(Mo $K\alpha$ ) | abs. coeff. / $cm^{-1}$                         | 3.474                  |
| $T / K$                                          | 100                                     | $F(000)$                                        | 832                    |
| crystal system                                   | triclinic                               | $\theta$ range / deg                            | 2.346–25.026           |
| space group                                      | $P-1$                                   | collected refl.                                 | 30177                  |
| $a / \text{\AA}$                                 | 9.9423(6)                               | $R_{int}$                                       | 0.0502                 |
| $b / \text{\AA}$                                 | 10.7112(7)                              | completeness / %                                | 99.9                   |
| $c / \text{\AA}$                                 | 17.5626(11)                             | data/restraints/<br>parameters                  | 6322/6/448             |
| $\alpha / \text{deg}$                            | 97.839(2)                               | GOF on $F^2$                                    | 1.081                  |
| $\beta / \text{deg}$                             | 91.515(2)                               | final $R_1 [I > 2\sigma(I)]$                    | 0.0274                 |
| $\gamma / \text{deg}$                            | 104.182(2)                              | final $wR_2$ [all data]                         | 0.0537                 |
| $V / \text{\AA}^3$                               | 1792.9(2)                               | diff. peak and hole / $e \cdot \text{\AA}^{-3}$ | 1.326 and $-1.413$     |
| detailed crystal structure parameters            |                                         |                                                 |                        |
| Re1–C / $\text{\AA}$                             | 2.093(4) – 2.116(4)                     | C–Re1–C( <i>trans</i> ) / $^\circ$              | 161.44(15), 161.98(14) |
| Re1 $\equiv$ N1 / $\text{\AA}$                   | 1.666(3)                                | N1 $\equiv$ Re1–C / $^\circ$                    | 98.69(15) – 99.80(15)  |
| Re1–N6 / $\text{\AA}$                            | 2.446(3)                                | N1 $\equiv$ Re1–N6 / $^\circ$                   | 176.94(13)             |

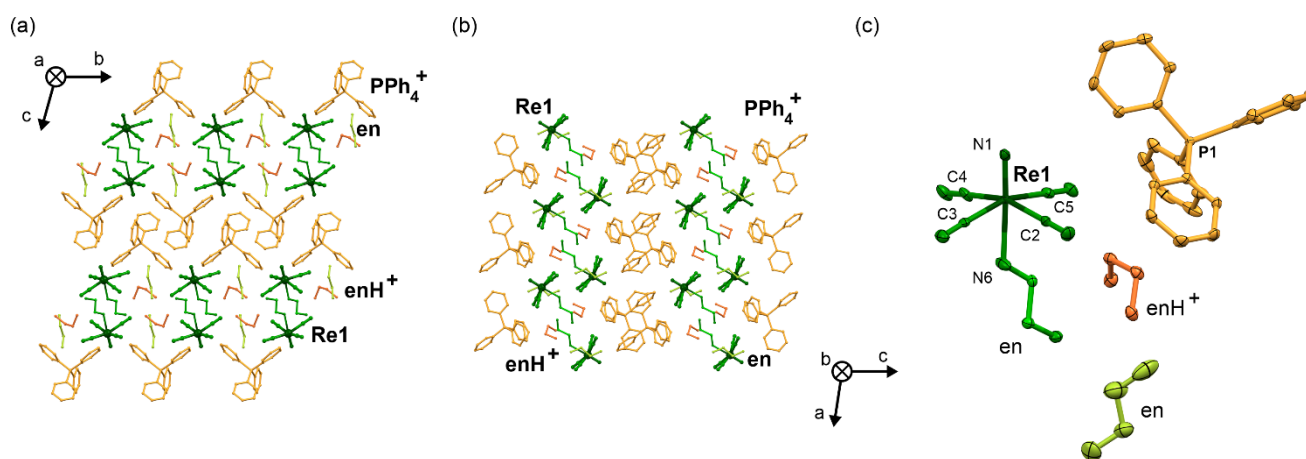

**Fig. S23** Representative structural views of the reference compound **Re-en**, containing mononuclear Re(V) complexes: the crystal structure presented along  $a$  and  $b$  crystallographic axes (a and b, respectively), and the asymmetric unit with the labeling scheme for selected symmetrically independent atoms (c). Thermal ellipsoids are presented for the asymmetric unit in (c) at the 50% probability level. Hydrogen atoms were omitted for clarity. Related crystal structure parameters are presented in Table S25 (see above).

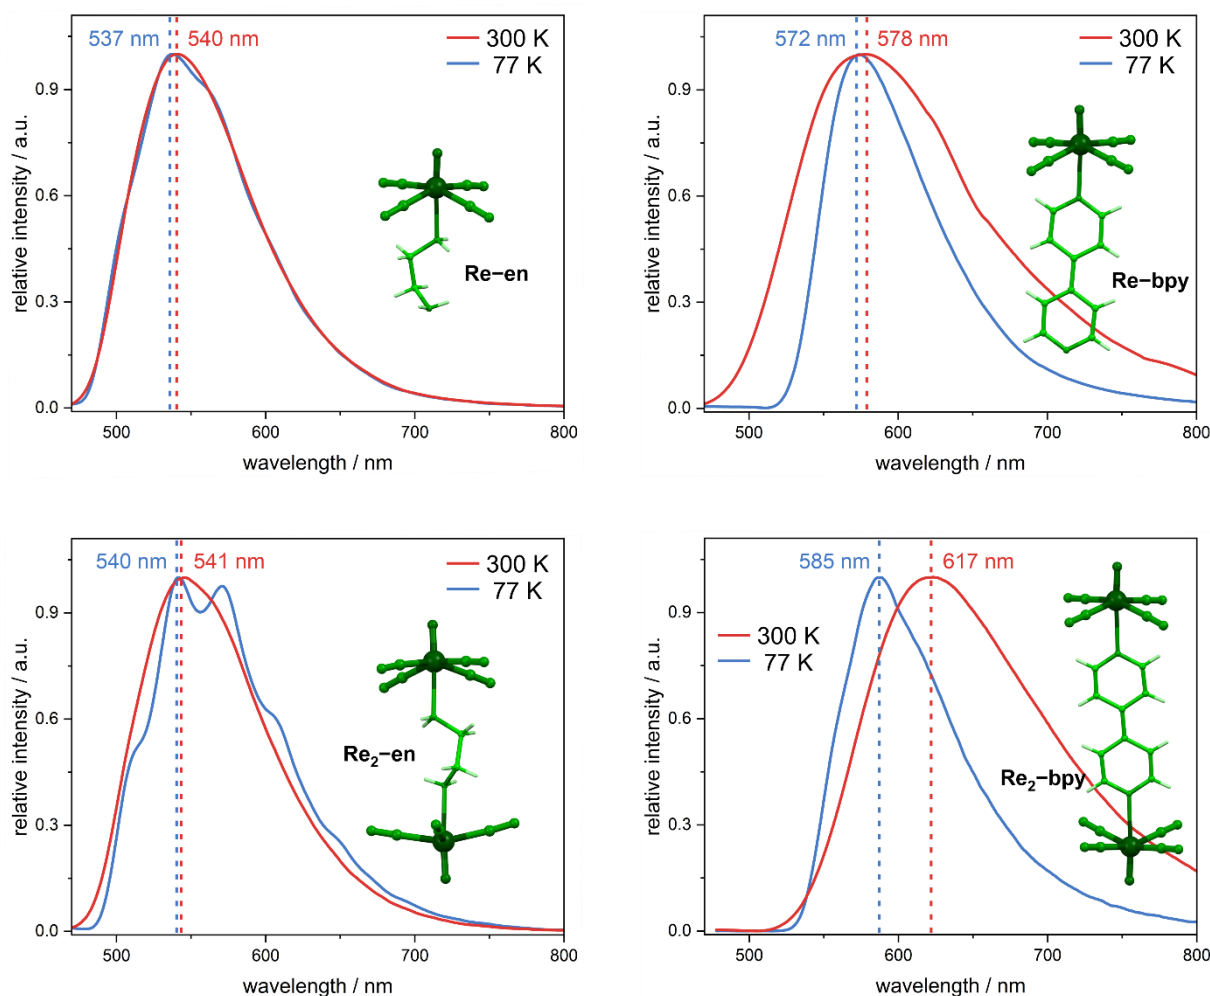

**Fig. S24** Comparison of low- and high-temperature (77 and 300 K, respectively) emission spectra ( $\lambda_{\text{ex}} = 380$  nm) of indicated monometallic  $[\text{Re}^{\text{V}}(\text{CN})_4(\text{N})(\text{L})]^{2-}$  complexes with en (the reference compound, **Re-en**, see Fig. S23) and bpy (the reference compound, **Re-bpy**) ligands, and their indicated dinuclear analogs,  $\{[\text{Re}^{\text{V}}(\text{CN})_4(\text{N})]_2(\text{L})\}^{4-}$  (**Re<sub>2</sub>-en** and **Re<sub>2</sub>-bpy**). The wavelength positions of the main maxima were depicted on each graph. The set of related spectroscopic parameters of the solid-state photoluminescent properties are gathered in Table S26.<sup>55</sup>

**Table S26** Selected spectroscopic parameters of the solid-state photoluminescent properties of **Re-en**, **Re-bpy**, **Re<sub>2</sub>-en**, and **Re<sub>2</sub>-bpy** at 77 and 300 K (see Fig. S24), including emission pattern maximum ( $\lambda^{\text{max}}$ ), average photoluminescence lifetime ( $\tau_{\text{av}}$ ), and absolute quantum yield ( $\Phi_{\text{em}}$ ).

| compound                    | selected spectroscopic parameters  |                                  |                                    |                                  |                    |
|-----------------------------|------------------------------------|----------------------------------|------------------------------------|----------------------------------|--------------------|
|                             | 77 K                               |                                  | 300 K                              |                                  |                    |
|                             | $\lambda^{\text{max}} / \text{nm}$ | $\tau_{\text{av}} / \mu\text{s}$ | $\lambda^{\text{max}} / \text{nm}$ | $\tau_{\text{av}} / \mu\text{s}$ | $\Phi_{\text{em}}$ |
| <b>Re-en</b>                | 537                                | 127.3                            | 540                                | 20.1                             | 0.73               |
| <b>Re<sub>2</sub>-en</b>    | 540                                | 57.7                             | 541                                | 19.5                             | 0.67               |
| <b>Re-bpy</b> <sup>55</sup> | 572                                | 53.9                             | 578                                | 6.8                              | 0.18               |
| <b>Re<sub>2</sub>-bpy</b>   | 585                                | 73.8                             | 617                                | 9.2                              | 0.31               |

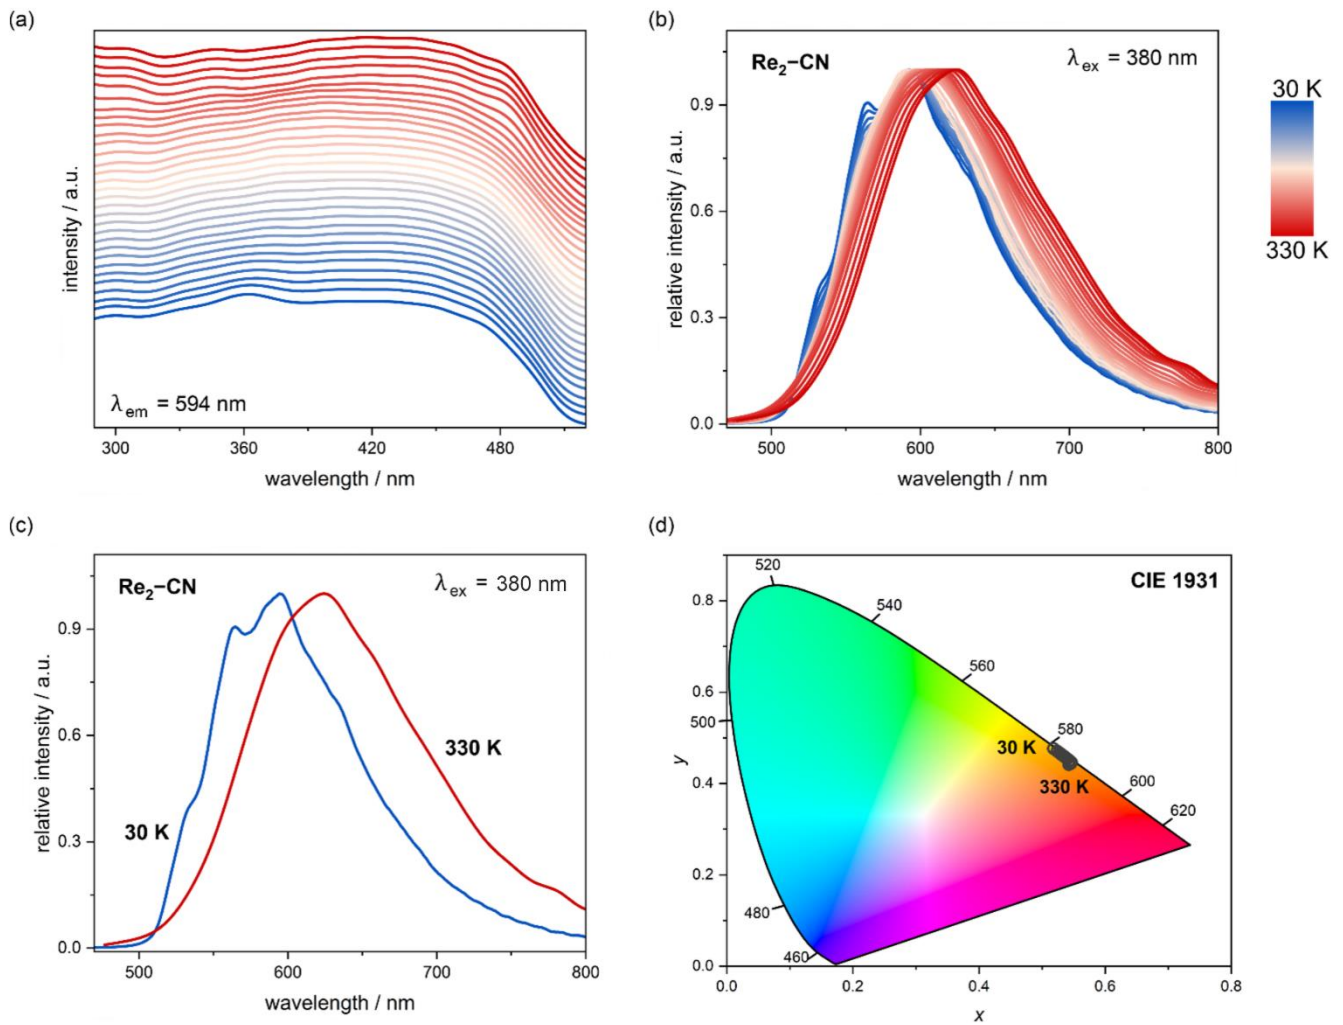

**Fig. S25** Solid-state photoluminescent properties of  $\text{Re}_2\text{-CN}$ : temperature-variable solid-state excitation (a) and emission (b) spectra collected under the indicated excitation and emission wavelengths, gathered in the 30–330 K temperature range, comparison of low- and high-temperature (30 and 330 K, respectively) emission spectra (c), and emission colors presented on the CIE 1931 chromaticity diagram (d). The related spectroscopic parameters of the emission patterns at each temperature are gathered in Table S27. The CIE 1931 chromaticity parameters, also determined at each temperature, are gathered in Table S28.



**Table S27** Selected spectroscopic parameters of the solid-state photoluminescent properties of **Re<sub>2</sub>-CN** material, detected at various indicated temperatures (see Fig. S25), including emission pattern maxima ( $\lambda^{\max}$ ), the integral area under the emission peak ( $I$ ), and full width at half maximum for the emission band ( $FWHM$ ), as well as absolute quantum yield ( $\Phi_{em}$ , room-temperature value only).

| Re <sub>2</sub> -CN |                                    |          |           |             |                                    |          |           |
|---------------------|------------------------------------|----------|-----------|-------------|------------------------------------|----------|-----------|
| T / K               | selected spectroscopic parameters  |          |           | T / K       | selected spectroscopic parameters  |          |           |
|                     | $\lambda^{\max}$ / nm <sup>a</sup> | I / a.u. | FWHM / nm |             | $\lambda^{\max}$ / nm <sup>a</sup> | I / a.u. | FWHM / nm |
| 30                  | 565, <u>595</u>                    | 123.1    | 109.2     | 190         | 596                                | 132.2    | 120.0     |
| 40                  | 565, <u>595</u>                    | 124.1    | 110.4     | 200         | 597                                | 133.2    | 121.9     |
| 50                  | 564, <u>595</u>                    | 125.0    | 111.3     | 210         | 597                                | 134.2    | 123.8     |
| 60                  | 565, <u>595</u>                    | 124.9    | 111.5     | 220         | 600                                | 135.2    | 124.4     |
| 70                  | 565, <u>595</u>                    | 124.7    | 111.6     | 230         | 601                                | 136.2    | 125.0     |
| 80                  | 565, <u>595</u>                    | 125.5    | 113.5     | 240         | 603                                | 137.7    | 126.2     |
| 90                  | 565, <u>593</u>                    | 126.3    | 115.3     | 250         | 606                                | 139.2    | 127.3     |
| 100                 | 565, <u>595</u>                    | 127.0    | 115.7     | 260         | 606                                | 140.1    | 129.5     |
| 110                 | 565, <u>595</u>                    | 127.7    | 116.1     | 270         | 608                                | 140.9    | 131.6     |
| 120                 | 565, <u>595</u>                    | 128.3    | 117.0     | 280         | 610                                | 141.6    | 132.4     |
| 130                 | 565, <u>595</u>                    | 128.8    | 117.9     | 290         | 613                                | 142.3    | 133.1     |
| 140                 | 595                                | 129.1    | 118.5     | 300         | 615                                | 142.5    | 133.8     |
| 150                 | 595                                | 129.4    | 119.1     | 310         | 618                                | 143.3    | 134.5     |
| 160                 | 595                                | 130.0    | 119.4     | 320         | 620                                | 144.5    | 135.3     |
| 170                 | 596                                | 130.6    | 119.6     | 330         | 623                                | 144.9    | 136.7     |
| 180                 | 596                                | 131.4    | 119.8     | $\Phi_{em}$ |                                    | 0.08     |           |

<sup>a</sup>For the temperature range of 30–130 K, more two well-distinguished maxima on the emission pattern are observed. The position of the main maximum at each temperature was underlined.

**Table S28** The CIE 1931 chromaticity  $x$  and  $y$  parameters of the solid-state photoluminescent properties of **Re<sub>2</sub>-CN** material, detected at various indicated temperatures (see Fig. S25), shown together with one-dimensional  $CCT$  and  $Duv$  metrics\* representing a chromaticity coordinate system.

| parameter                        |     | Re <sub>2</sub> -CN |        |        |        |        |        |        |
|----------------------------------|-----|---------------------|--------|--------|--------|--------|--------|--------|
|                                  |     | 30 K                | 40 K   | 50 K   | 60 K   | 70 K   | 80 K   | 90 K   |
| CIE 1931 chromaticity parameters | $x$ | 0.518               | 0.521  | 0.524  | 0.525  | 0.527  | 0.529  | 0.530  |
|                                  | $y$ | 0.476               | 0.474  | 0.471  | 0.469  | 0.468  | 0.466  | 0.464  |
| $CCT / K$                        |     | 2485                | 2441   | 2398   | 2372   | 2346   | 2323   | 2301   |
| $Duv / a.u$                      |     | 0.0182              | 0.0173 | 0.0165 | 0.0160 | 0.0154 | 0.0151 | 0.0146 |
|                                  |     | 100 K               | 110 K  | 120 K  | 130 K  | 140 K  | 150 K  | 160 K  |
| CIE 1931 chromaticity parameters | $x$ | 0.532               | 0.533  | 0.534  | 0.536  | 0.533  | 0.531  | 0.532  |
|                                  | $y$ | 0.463               | 0.461  | 0.460  | 0.459  | 0.461  | 0.463  | 0.462  |
| $CCT / K$                        |     | 2278                | 2256   | 2239   | 2223   | 2255   | 2286   | 2264   |
| $Duv / a.u$                      |     | 0.0142              | 0.0138 | 0.0135 | 0.0132 | 0.0138 | 0.0143 | 0.0139 |
|                                  |     | 170 K               | 180 K  | 190 K  | 200 K  | 210 K  | 220 K  | 230 K  |
| CIE 1931 chromaticity parameters | $x$ | 0.534               | 0.532  | 0.531  | 0.534  | 0.537  | 0.539  | 0.540  |
|                                  | $y$ | 0.460               | 0.462  | 0.463  | 0.460  | 0.457  | 0.455  | 0.454  |
| $CCT / K$                        |     | 22412               | 2264   | 2286   | 2240   | 2195   | 2178   | 2161   |
| $Duv / a.u$                      |     | 0.0135              | 0.0139 | 0.0143 | 0.0134 | 0.0126 | 0.0123 | 0.0120 |
|                                  |     | 240 K               | 250 K  | 260 K  | 270 K  | 280 K  | 290 K  | 300 K  |
| CIE 1931 chromaticity parameters | $x$ | 0.542               | 0.543  | 0.545  | 0.547  | 0.546  | 0.546  | 0.545  |
|                                  | $y$ | 0.452               | 0.450  | 0.448  | 0.446  | 0.445  | 0.444  | 0.444  |
| $CCT / K$                        |     | 2135                | 2110   | 2086   | 2062   | 20560  | 2057   | 2064   |
| $Duv / a.u$                      |     | 0.0116              | 0.0111 | 0.0107 | 0.0102 | 0.0099 | 0.0096 | 0.0094 |
|                                  |     | 310 K               | 320 K  | 330 K  | -      | -      | -      | -      |
| CIE 1931 chromaticity parameters | $x$ | 0.544               | 0.543  | 0.542  | -      | -      | -      | -      |
|                                  | $y$ | 0.443               | 0.442  | 0.441  | -      | -      | -      | -      |
| $CCT / K$                        |     | 2061                | 2067   | 2065   | -      | -      | -      | -      |
| $Duv / a.u$                      |     | 0.0092              | 0.0090 | 0.0087 | -      | -      | -      | -      |

\*The  $Duv$  (Delta  $u,v$ ) and  $CCT$  (correlated color temperature) quality parameters are one-dimensional metrics that describe the light color point along the black body curve. Typically, they are used in explaining how close to “pure white” light a particular light source is. They are significant whenever discussing color-sensitive lighting applications. Additionally, compared to CIE 1931  $x$  and  $y$  parameters, the one-dimensionality of both parameters can help track temperature changes in the emission spectrum.<sup>S6</sup>

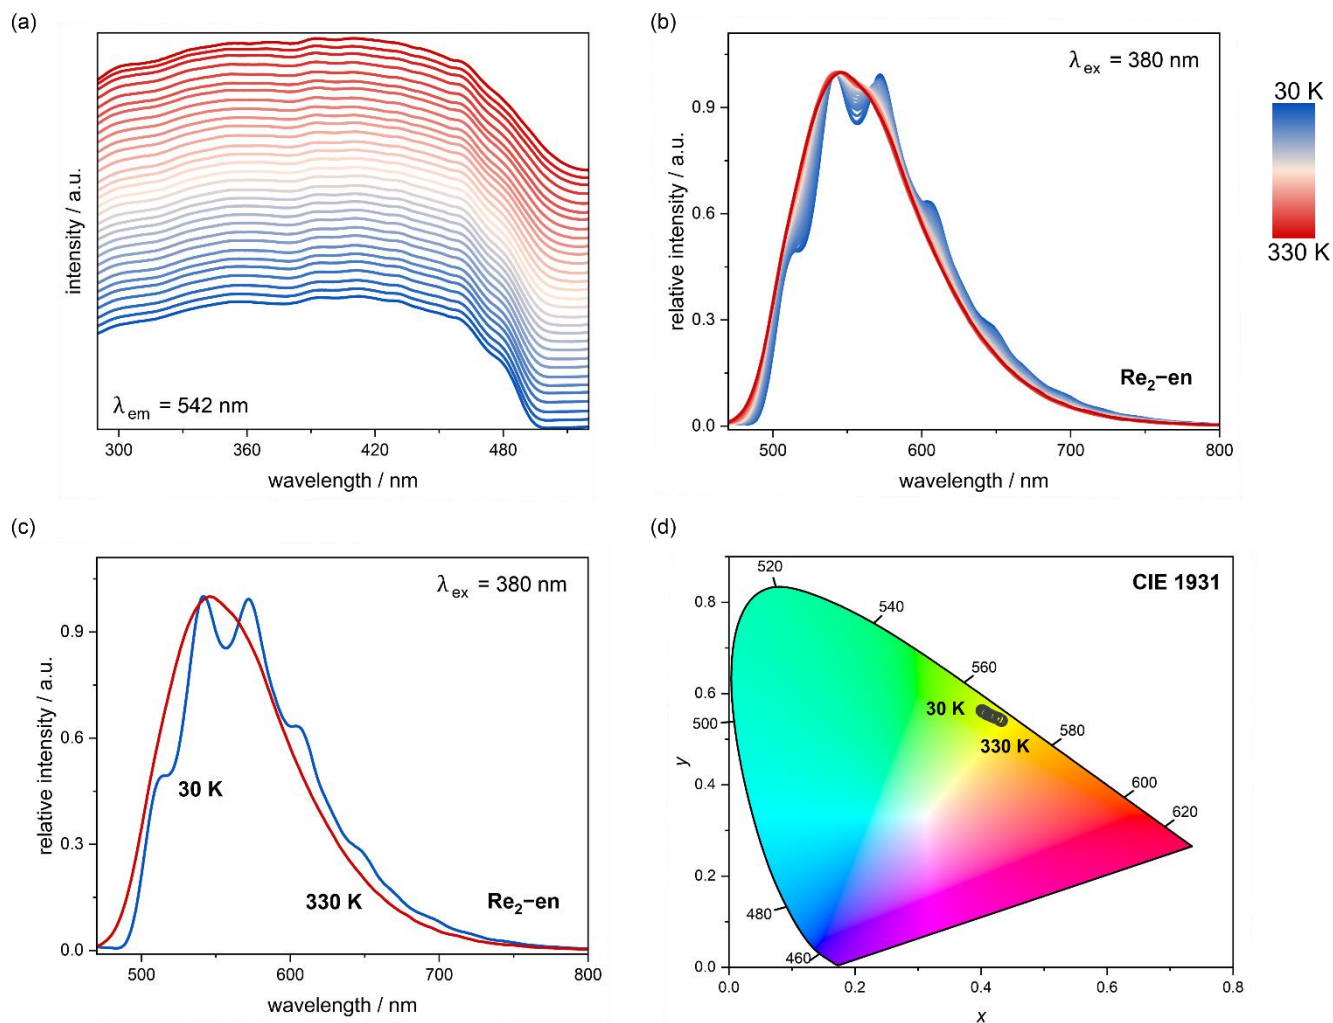

**Fig. S26** Solid-state photoluminescent properties of  $\text{Re}_2\text{-en}$ : temperature-variable solid-state excitation (a) and emission (b) spectra collected under the indicated excitation and emission wavelengths, gathered in the 30–330 K temperature range, comparison of low- and high-temperature (30 and 330 K, respectively) emission spectra (c), and emission colors presented on the CIE 1931 chromaticity diagram (d). The related spectroscopic parameters of the emission patterns at each temperature are gathered in Table S29. The CIE 1931 chromaticity parameters, also determined at each temperature, are gathered in Table S30.

**Table S29** Selected spectroscopic parameters of the solid-state photoluminescent properties of **Re<sub>2</sub>-en** material, detected at various indicated temperatures (see Fig. S26), including emission pattern maxima ( $\lambda^{\max}$ ), the integral area under the emission peak ( $I$ ), and full width at half maximum for the emission band ( $FWHM$ ), as well as absolute quantum yield ( $\Phi_{em}$ , room-temperature value only).

| Re <sub>2</sub> -en |                                    |            |             |             |                                    |            |             |
|---------------------|------------------------------------|------------|-------------|-------------|------------------------------------|------------|-------------|
| T / K               | selected spectroscopic parameters  |            |             | T / K       | selected spectroscopic parameters  |            |             |
|                     | $\lambda^{\max}$ / nm <sup>a</sup> | $I$ / a.u. | $FWHM$ / nm |             | $\lambda^{\max}$ / nm <sup>a</sup> | $I$ / a.u. | $FWHM$ / nm |
| 30                  | 513, <u>540</u> ,<br>571, 605      | 108.4      | 97.9        | 190         | 540                                | 109.9      | 103.0       |
| 40                  | 513, <u>540</u> ,<br>571, 605      | 108.4      | 99.5        | 200         | 540                                | 110.0      | 102.7       |
| 50                  | 513, <u>540</u> ,<br>571, 605      | 108.5      | 101.2       | 210         | 540                                | 109.8      | 102.4       |
| 60                  | 513, <u>540</u> ,<br>570, 605      | 109.1      | 103.9       | 220         | 540                                | 109.7      | 102.1       |
| 70                  | <u>540</u> , 569,<br>605           | 109.9      | 105.1       | 230         | 539                                | 109.6      | 101.7       |
| 80                  | <u>540</u> , 571,<br>605           | 110.0      | 105.3       | 240         | 539                                | 109.4      | 102.2       |
| 90                  | <u>539</u> , 569,<br>605           | 110.1      | 105.2       | 250         | 539                                | 109.1      | 100.6       |
| 100                 | <u>539</u> , 568,<br>605           | 110.1      | 105.1       | 260         | 539                                | 108.7      | 100.4       |
| 110                 | <u>539</u> , 568,<br>605           | 110.2      | 105.0       | 270         | 539                                | 108.4      | 100.1       |
| 120                 | <u>540</u> , 567                   | 110.2      | 104.7       | 280         | 540                                | 108.9      | 100.1       |
| 130                 | <u>540</u> , 566                   | 110.3      | 104.5       | 290         | 540                                | 109.3      | 100.0       |
| 140                 | <u>540</u> , 564                   | 110.2      | 104.5       | 300         | 540                                | 109.5      | 100.0       |
| 150                 | <u>540</u> , 563                   | 110.1      | 104.4       | 310         | 539                                | 109.7      | 100.0       |
| 160                 | <u>540</u> , 566                   | 109.6      | 103.9       | 320         | 539                                | 109.9      | 99.9        |
| 170                 | 541                                | 109.4      | 103.7       | 330         | 539                                | 110.2      | 100.3       |
| 180                 | 541                                | 109.7      | 103.2       | $\Phi_{em}$ |                                    | 0.67       |             |

<sup>a</sup>For the temperature range of 30–160 K, two or more well-distinguished maxima on the emission pattern are observed. The position of the main maximum at each temperature was underlined.

**Table S30** The CIE 1931 chromaticity  $x$  and  $y$  parameters of the solid-state photoluminescent properties of **Re<sub>2</sub>-en** material, detected at various indicated temperatures (see Fig. S26), shown together with one-dimensional  $CCT$  (correlated color temperature) and  $Duv$  (Delta  $u,v$ ) metrics\* representing a chromaticity coordinate system.

| parameter                        |     | Re <sub>2</sub> -en |        |        |        |        |        |        |
|----------------------------------|-----|---------------------|--------|--------|--------|--------|--------|--------|
|                                  |     | 30 K                | 40 K   | 50 K   | 60 K   | 70 K   | 80 K   | 90 K   |
| CIE 1931 chromaticity parameters | $x$ | 0.432               | 0.432  | 0.431  | 0.429  | 0.428  | 0.425  | 0.422  |
|                                  | $y$ | 0.541               | 0.541  | 0.542  | 0.543  | 0.545  | 0.546  | 0.548  |
| $CCT / K$                        |     | 3854                | 3866   | 3877   | 3906   | 3934   | 3978   | 4021   |
| $Duv / a.u$                      |     | 0.0484              | 0.0487 | 0.0490 | 0.0498 | 0.0506 | 0.0516 | 0.0526 |
|                                  |     | 100 K               | 110 K  | 120 K  | 130 K  | 140 K  | 150 K  | 160 K  |
| CIE 1931 chromaticity parameters | $x$ | 0.420               | 0.417  | 0.414  | 0.413  | 0.411  | 0.408  | 0.408  |
|                                  | $y$ | 0.549               | 0.551  | 0.552  | 0.553  | 0.555  | 0.556  | 0.558  |
| $CCT / K$                        |     | 4068                | 4115   | 4148   | 4180   | 4215   | 4251   | 4263   |
| $Duv / a.u$                      |     | 0.0538              | 0.0549 | 0.0557 | 0.0565 | 0.0574 | 0.0582 | 0.0588 |
|                                  |     | 170 K               | 180 K  | 190 K  | 200 K  | 210 K  | 220 K  | 230 K  |
| CIE 1931 chromaticity parameters | $x$ | 0.407               | 0.406  | 0.406  | 0.406  | 0.406  | 0.405  | 0.404  |
|                                  | $y$ | 0.559               | 0.559  | 0.560  | 0.560  | 0.559  | 0.560  | 0.561  |
| $CCT / K$                        |     | 4277                | 4289   | 4301   | 4301   | 4301   | 4313   | 4325   |
| $Duv / a.u$                      |     | 0.0592              | 0.0596 | 0.0599 | 0.0599 | 0.0598 | 0.0602 | 0.0606 |
|                                  |     | 240 K               | 250 K  | 260 K  | 270 K  | 280 K  | 290 K  | 300 K  |
| CIE 1931 chromaticity parameters | $x$ | 0.403               | 0.403  | 0.402  | 0.402  | 0.402  | 0.402  | 0.402  |
|                                  | $y$ | 0.561               | 0.562  | 0.562  | 0.563  | 0.562  | 0.562  | 0.562  |
| $CCT / K$                        |     | 4339                | 4353   | 4361   | 4370   | 4366   | 4363   | 4356   |
| $Duv / a.u$                      |     | 0.0609              | 0.0613 | 0.0614 | 0.0617 | 0.0616 | 0.0615 | 0.0612 |
|                                  |     | 310 K               | 320 K  | 330 K  | -      | -      | -      | -      |
| CIE 1931 chromaticity parameters | $x$ | 0.402               | 0.403  | 0.403  | -      | -      | -      | -      |
|                                  | $y$ | 0.561               | 0.561  | 0.561  | -      | -      | -      | -      |
| $CCT / K$                        |     | 4348                | 4343   | 4343   | -      | -      | -      | -      |
| $Duv / a.u$                      |     | 0.0609              | 0.0608 | 0.0608 | -      | -      | -      | -      |

\*The  $Duv$  and  $CCT$  quality parameters are commented on below the Table S28 (see above).

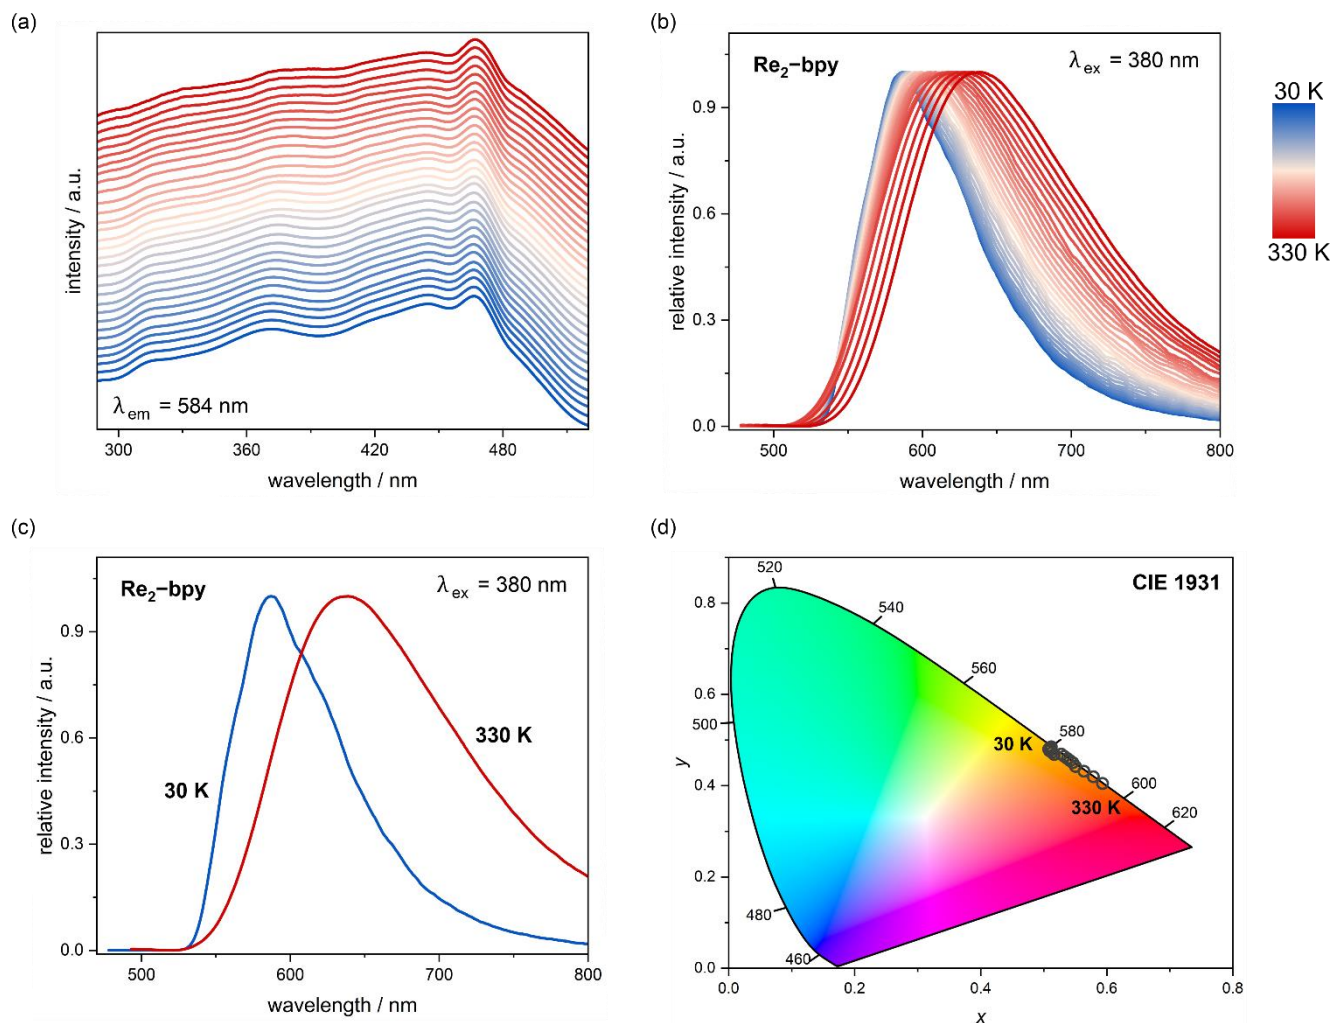

**Fig. S27** Solid-state photoluminescent properties of  $\text{Re}_2\text{-bpy}$ : temperature-variable solid-state excitation (a) and emission (b) spectra collected under the indicated excitation and emission wavelengths, gathered in the 30–330 K temperature range, comparison of low- and high-temperature (30 and 330 K, respectively) emission spectra (c), and emission colors presented on the CIE 1931 chromaticity diagram (d). The related spectroscopic parameters of the emission patterns at each temperature are gathered in Table S31. The CIE 1931 chromaticity parameters, also determined at each temperature, are gathered in Table S32.

**Table S31** Selected spectroscopic parameters of the solid-state photoluminescent properties of **Re<sub>2</sub>-bpy** material, detected at various indicated temperatures (see Fig. S27), including emission pattern maxima ( $\lambda^{\text{max}}$ ), the integral area under the emission peak ( $I$ ), and full width at half maximum for the emission band ( $FWHM$ ), as well as absolute quantum yield ( $\Phi_{\text{em}}$ , room-temperature value only).

| <b>Re<sub>2</sub>-bpy</b> |                                    |                   |                    |                    |                                    |                   |                    |
|---------------------------|------------------------------------|-------------------|--------------------|--------------------|------------------------------------|-------------------|--------------------|
| $T / \text{K}$            | selected spectroscopic parameters  |                   |                    | $T / \text{K}$     | selected spectroscopic parameters  |                   |                    |
|                           | $\lambda^{\text{max}} / \text{nm}$ | $I / \text{a.u.}$ | $FWHM / \text{nm}$ |                    | $\lambda^{\text{max}} / \text{nm}$ | $I / \text{a.u.}$ | $FWHM / \text{nm}$ |
| 30                        | 584                                | 96.1              | 86.0               | 190                | 589.5                              | 125.8             | 108.6              |
| 40                        | 584                                | 96.7              | 86.5               | 200                | 589                                | 128.5             | 111.1              |
| 50                        | 584                                | 97.3              | 87.0               | 210                | 590                                | 131.1             | 113.6              |
| 60                        | 585                                | 98.0              | 87.4               | 220                | 591                                | 134.6             | 116.1              |
| 70                        | 585                                | 98.7              | 87.8               | 230                | 591.5                              | 138.0             | 119.5              |
| 80                        | 585                                | 100.1             | 89.0               | 240                | 593.5                              | 140.7             | 122.9              |
| 90                        | 586                                | 101.4             | 90.2               | 250                | 595.5                              | 143.3             | 126.2              |
| 100                       | 586                                | 103.3             | 91.6               | 260                | 599.5                              | 145.3             | 129.5              |
| 110                       | 586                                | 105.1             | 93.0               | 270                | 603.5                              | 147.3             | 131.4              |
| 120                       | 587                                | 107.8             | 95.2               | 280                | 607                                | 151.3             | 133.3              |
| 130                       | 587                                | 110.4             | 97.4               | 290                | 611                                | 155.2             | 139.1              |
| 140                       | 587                                | 113.3             | 100.1              | 300                | 617                                | 157.4             | 142.8              |
| 150                       | 588                                | 116.1             | 102.7              | 310                | 622                                | 159.2             | 144.8              |
| 160                       | 588                                | 118.3             | 104.4              | 320                | 628                                | 162.5             | 148.6              |
| 170                       | 588                                | 120.4             | 106.1              | 330                | 634                                | 167.0             | 150.1              |
| 180                       | 589                                | 123.1             | 108.6              | $\Phi_{\text{em}}$ |                                    | 0.31              |                    |

**Table S32** The CIE 1931 chromaticity  $x$  and  $y$  parameters of the solid-state photoluminescent properties of **Re<sub>2</sub>-bpy** material, detected at various indicated temperatures (see Fig. S27), shown together with one-dimensional  $CCT$  (correlated color temperature) and  $Duv$  (Delta  $u,v$ ) metrics\* representing a chromaticity coordinate system.

| parameter                        |     | Re <sub>2</sub> -bpy |        |        |        |        |        |        |
|----------------------------------|-----|----------------------|--------|--------|--------|--------|--------|--------|
|                                  |     | 30 K                 | 40 K   | 50 K   | 60 K   | 70 K   | 80 K   | 90 K   |
| CIE 1931 chromaticity parameters | $x$ | 0.508                | 0.510  | 0.512  | 0.511  | 0.510  | 0.512  | 0.510  |
|                                  | $y$ | 0.480                | 0.482  | 0.485  | 0.484  | 0.484  | 0.483  | 0.480  |
| $CCT / K$                        |     | 2608                 | 2604   | 2599   | 2605   | 2610   | 2583   | 2587   |
| $Duv / a.u$                      |     | 0.0196               | 0.0203 | 0.0209 | 0.0208 | 0.0206 | 0.0204 | 0.0195 |
|                                  |     | 100 K                | 110 K  | 120 K  | 130 K  | 140 K  | 150 K  | 160 K  |
| CIE 1931 chromaticity parameters | $x$ | 0.509                | 0.509  | 0.511  | 0.513  | 0.515  | 0.517  | 0.522  |
|                                  | $y$ | 0.478                | 0.476  | 0.474  | 0.473  | 0.470  | 0.468  | 0.469  |
| $CCT / K$                        |     | 2589                 | 2572   | 2540   | 2510   | 2478   | 2448   | 2399   |
| $Duv / a.u$                      |     | 0.0190               | 0.0185 | 0.0179 | 0.0173 | 0.0166 | 0.0159 | 0.0159 |
|                                  |     | 170 K                | 180 K  | 190 K  | 200 K  | 210 K  | 220 K  | 230 K  |
| CIE 1931 chromaticity parameters | $x$ | 0.528                | 0.530  | 0.533  | 0.535  | 0.537  | 0.540  | 0.542  |
|                                  | $y$ | 0.469                | 0.467  | 0.464  | 0.462  | 0.459  | 0.457  | 0.455  |
| $CCT / K$                        |     | 2353                 | 2315   | 2278   | 2243   | 22110  | 2178   | 2147   |
| $Duv / a.u$                      |     | 0.0160               | 0.0153 | 0.0146 | 0.0139 | 0.0133 | 0.0128 | 0.0122 |
|                                  |     | 240 K                | 250 K  | 260 K  | 270 K  | 280 K  | 290 K  | 300 K  |
| CIE 1931 chromaticity parameters | $x$ | 0.544                | 0.546  | 0.548  | 0.550  | 0.557  | 0.564  | 0.571  |
|                                  | $y$ | 0.452                | 0.450  | 0.446  | 0.442  | 0.437  | 0.431  | 0.426  |
| $CCT / K$                        |     | 2118                 | 2090   | 2052   | 2016   | 1947   | 1882   | 1823   |
| $Duv / a.u$                      |     | 0.0117               | 0.0112 | 0.0103 | 0.0094 | 0.0087 | 0.0082 | 0.0082 |
|                                  |     | 310 K                | 320 K  | 330 K  | -      | -      | -      | -      |
| CIE 1931 chromaticity parameters | $x$ | 0.579                | 0.586  | 0.593  | -      | -      | -      | -      |
|                                  | $y$ | 0.419                | 0.412  | 0.405  | -      | -      | -      | -      |
| $CCT / K$                        |     | 1773                 | 1736   | 1714   | -      | -      | -      | -      |
| $Duv / a.u$                      |     | 0.0087               | 0.0098 | 0.0122 | -      | -      | -      | -      |

\*The  $Duv$  and  $CCT$  quality parameters are commented on below the Table S28 (see above).



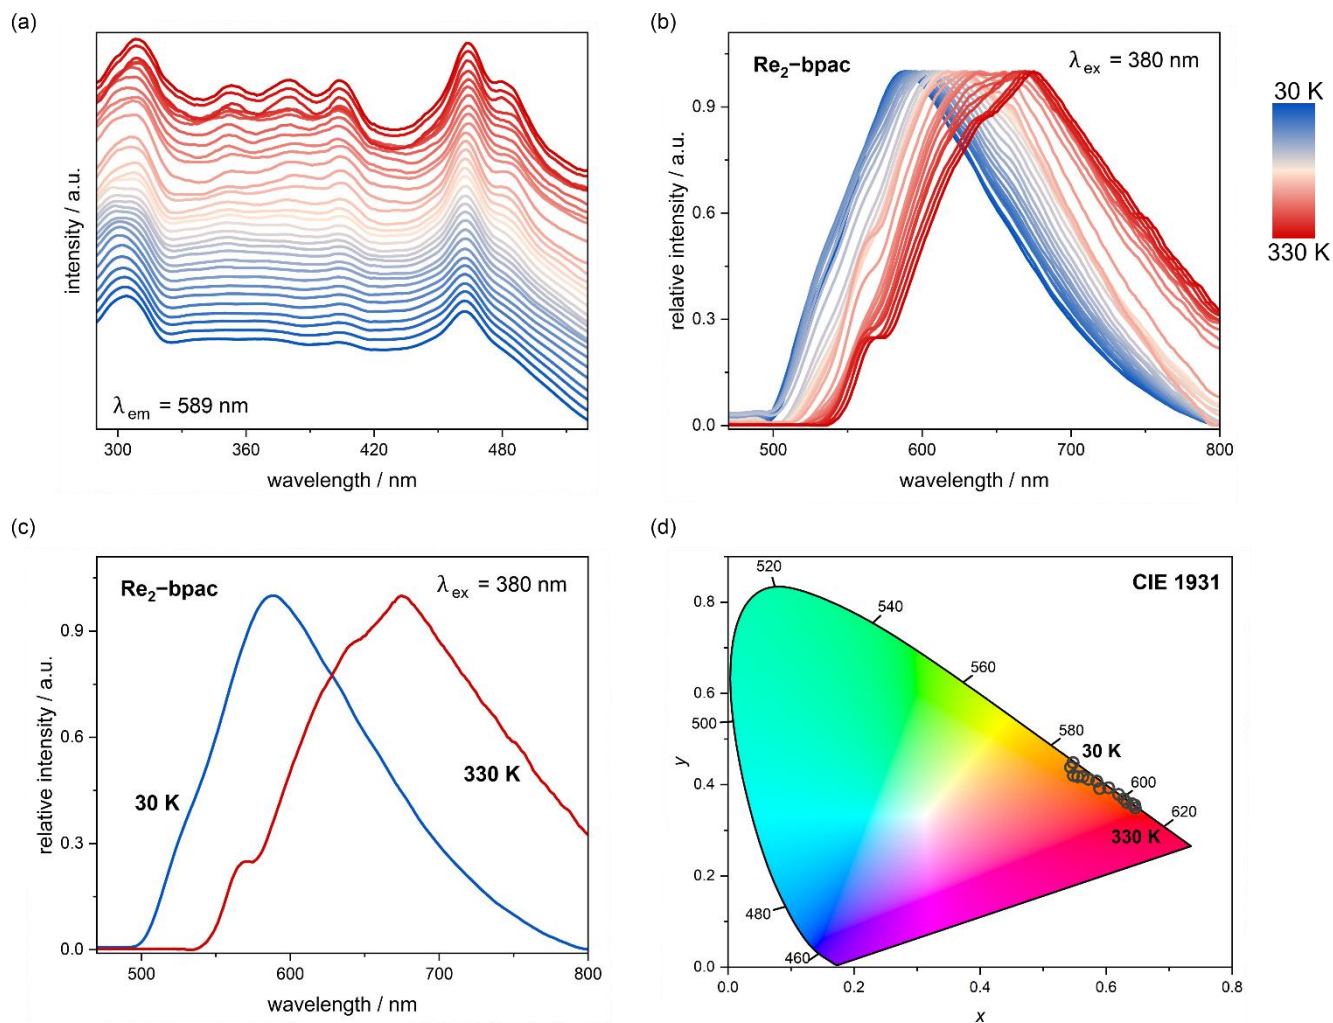

**Fig. S28** Solid-state photoluminescent properties of  $\text{Re}_2\text{-bpac}$ : temperature-variable solid-state excitation (a) and emission (b) spectra collected under the indicated excitation and emission wavelengths, gathered in the 30–330 K temperature range, comparison of low- and high-temperature (30 and 330 K, respectively) emission spectra (c), and emission colors presented on the CIE 1931 chromaticity diagram (d). The related spectroscopic parameters of the emission patterns at each temperature are gathered in Table S33. The CIE 1931 chromaticity parameters, also determined at each temperature, are gathered in Table S34.

**Table S33** Selected spectroscopic parameters of the solid-state photoluminescent properties of **Re<sub>2</sub>-bpac** material, detected at various indicated temperatures (see Fig. S28), including emission pattern maxima ( $\lambda^{\text{max}}$ ), the integral area under the emission peak ( $I$ ), and full width at half maximum for the emission band ( $FWHM$ ), as well as absolute quantum yield ( $\Phi_{\text{em}}$ , room-temperature value only).

| <b>Re<sub>2</sub>-bpac</b> |                                    |                   |                    |                    |                                    |                   |                    |
|----------------------------|------------------------------------|-------------------|--------------------|--------------------|------------------------------------|-------------------|--------------------|
| $T / \text{K}$             | selected spectroscopic parameters  |                   |                    | $T / \text{K}$     | selected spectroscopic parameters  |                   |                    |
|                            | $\lambda^{\text{max}} / \text{nm}$ | $I / \text{a.u.}$ | $FWHM / \text{nm}$ |                    | $\lambda^{\text{max}} / \text{nm}$ | $I / \text{a.u.}$ | $FWHM / \text{nm}$ |
| 30                         | 589                                | 133.4             | 124.2              | 190                | 626                                | 152.9             | 148.1              |
| 40                         | 588                                | 135.3             | 128.3              | 200                | 628                                | 151.6             | 149.7              |
| 50                         | 590                                | 141.5             | 137.9              | 210                | 624                                | 149.1             | 150.2              |
| 60                         | 590                                | 142.0             | 136.4              | 220                | 629                                | 150.1             | 152.3              |
| 70                         | 591                                | 145.2             | 140.1              | 230                | 630                                | 155.3             | 148.4              |
| 80                         | 591                                | 147.3             | 142.9              | 240                | 634                                | –                 | 159.6              |
| 90                         | 595                                | 150.3             | 145.5              | 250                | 638                                | –                 | 165.0              |
| 100                        | 600                                | 149.7             | 147.7              | 260                | 654                                | –                 | 167.7              |
| 110                        | 600                                | 150.2             | 148.0              | 270                | 661                                | –                 | 168.4              |
| 120                        | 602                                | 151.2             | 148.2              | 280                | 663                                | –                 | 169.2              |
| 130                        | 604                                | 155.4             | 148.1              | 290                | 664                                | –                 | 167.1              |
| 140                        | 609                                | 150.7             | 147.2              | 300                | 666                                | –                 | 166.3              |
| 150                        | 611                                | 148.4             | 144.9              | 310                | 667                                | –                 | 164.6              |
| 160                        | 616                                | 150.8             | 146.3              | 320                | 672                                | –                 | 165.6              |
| 170                        | 617                                | 151.7             | 146.1              | 330                | 676                                | –                 | 164.9              |
| 180                        | 627                                | 153.0             | 147.5              | $\Phi_{\text{em}}$ |                                    |                   | 0.37               |

**Table S34** The CIE 1931 chromaticity  $x$  and  $y$  parameters of the solid-state photoluminescent properties of **Re<sub>2</sub>-bpac** material, detected at various indicated temperatures (see Fig. S28), shown together with one-dimensional  $CCT$  (correlated color temperature) and  $Duv$  (Delta  $u,v$ ) metrics\* representing a chromaticity coordinate system.

| parameter                        |     | Re <sub>2</sub> -bpac |        |        |        |         |        |        |
|----------------------------------|-----|-----------------------|--------|--------|--------|---------|--------|--------|
|                                  |     | 30 K                  | 40 K   | 50 K   | 60 K   | 70 K    | 80 K   | 90 K   |
| CIE 1931 chromaticity parameters | $x$ | 0.554                 | 0.552  | 0.548  | 0.546  | 0.543   | 0.543  | 0.541  |
|                                  | $y$ | 0.438                 | 0.440  | 0.448  | 0.441  | 0.441   | 0.441  | 0.439  |
| $CCT / K$                        |     | 1974                  | 1993   | 2070   | 2038   | 2057    | 2066   | 2064   |
| $Duv / a.u$                      |     | 0.0087                | 0.0091 | 0.0108 | 0.0089 | 0.00878 | 0.0088 | 0.0080 |
|                                  |     | 100 K                 | 110 K  | 120 K  | 130 K  | 140 K   | 150 K  | 160 K  |
| CIE 1931 chromaticity parameters | $x$ | 0.542                 | 0.543  | 0.546  | 0.548  | 0.558   | 0.585  | 0.588  |
|                                  | $y$ | 0.436                 | 0.431  | 0.427  | 0.420  | 0.413   | 0.408  | 0.399  |
| $CCT / K$                        |     | 2041                  | 2005   | 1957   | 1908   | 1824    | 1728   | 1714   |
| $Duv / a.u$                      |     | 0.0074                | 0.0063 | 0.0053 | 0.0038 | 0.0037  | 0.0094 | 0.0104 |
|                                  |     | 170 K                 | 180 K  | 190 K  | 200 K  | 210 K   | 220 K  | 230 K  |
| CIE 1931 chromaticity parameters | $x$ | 0.590                 | 0.603  | 0.604  | 0.603  | 0.604   | 0.600  | 0.620  |
|                                  | $y$ | 0.392                 | 0.395  | 0.393  | 0.394  | 0.393   | 0.388  | 0.379  |
| $CCT / K$                        |     | 1714                  | 1722   | 1726   | 1724   | 1727    | 1734   | 1846   |
| $Duv / a.u$                      |     | 0.0116                | 0.0173 | 0.0183 | 0.0179 | 0.0184  | 0.0179 | 0.0340 |
|                                  |     | 240 K                 | 250 K  | 260 K  | 270 K  | 280 K   | 290 K  | 300 K  |
| CIE 1931 chromaticity parameters | $x$ | 0.626                 | 0.628  | 0.631  | 0.633  | 0.636   | 0.641  | 0.643  |
|                                  | $y$ | 0.372                 | 0.369  | 0.365  | 0.360  | 0.360   | 0.358  | 0.358  |
| $CCT / K$                        |     | 1939                  | 1994   | 2060   | 2153   | 2197    | 2276   | 2312   |
| $Duv / a.u$                      |     | 0.0431                | 0.0478 | 0.0533 | 0.0601 | 0.0642  | 0.0712 | 0.0743 |
|                                  |     | 310 K                 | 320 K  | 330 K  | -      | -       | -      | -      |
| CIE 1931 chromaticity parameters | $x$ | 0.645                 | 0.647  | 0.646  | -      | -       | -      | -      |
|                                  | $y$ | 0.355                 | 0.354  | 0.349  | -      | -       | -      | -      |
| $CCT / K$                        |     | 2380                  | 2436   | 2541   | -      | -       | -      | -      |
| $Duv / a.u$                      |     | 0.0791                | 0.0829 | 0.0885 | -      | -       | -      | -      |

\*The  $Duv$  and  $CCT$  quality parameters are commented on below the Table S28 (see above).

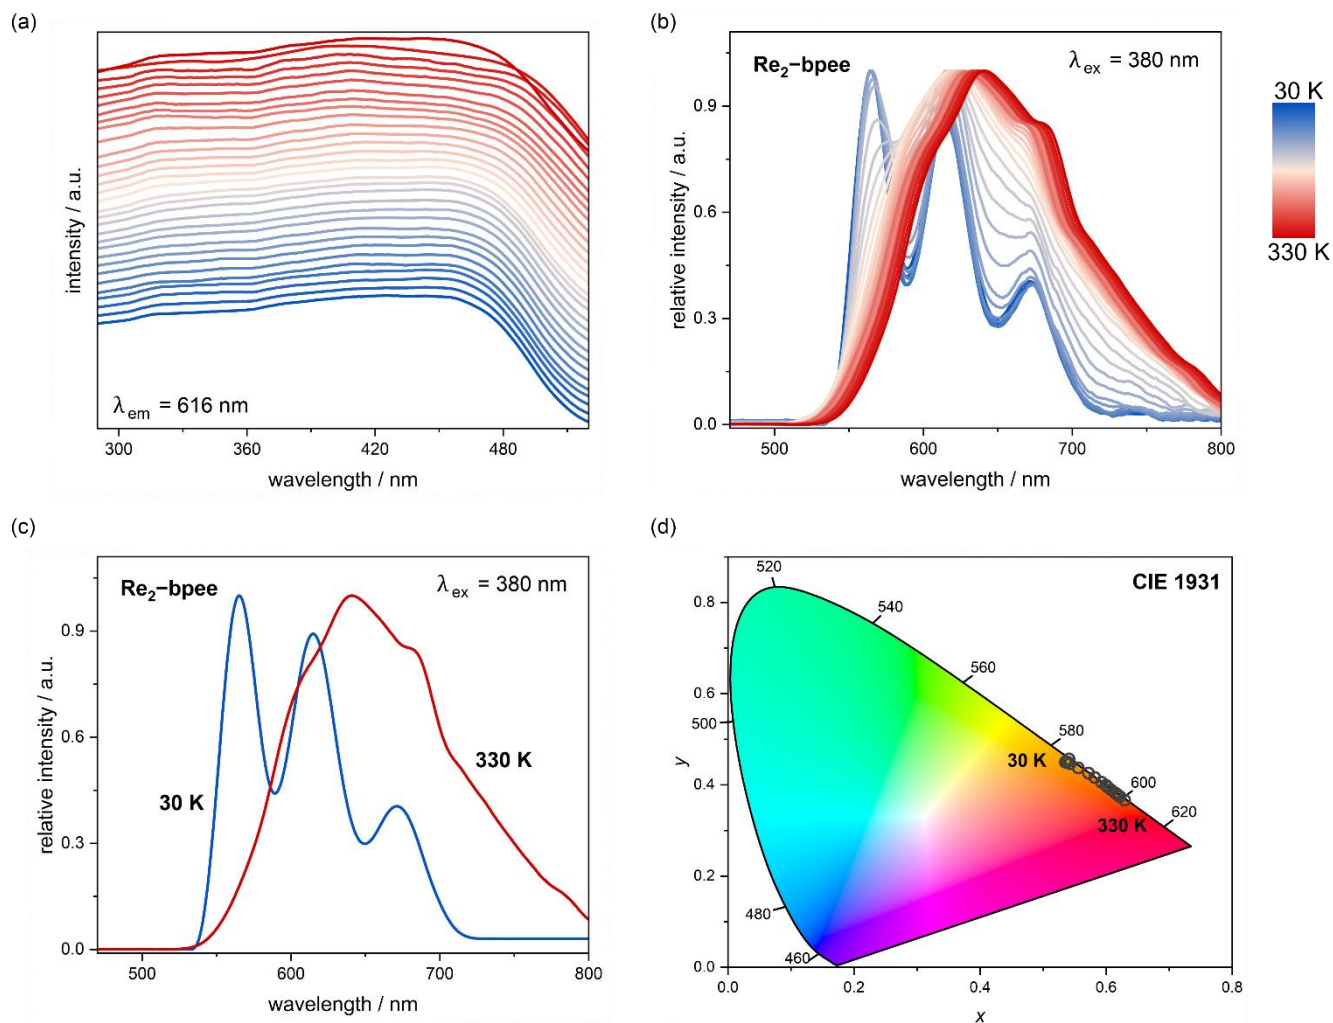

**Fig. S29** Solid-state photoluminescent properties of  $\text{Re}_2\text{-bpee}$ : temperature-variable solid-state excitation (a) and emission (b) spectra collected under the indicated excitation and emission wavelengths, gathered in the 30–330 K temperature range, comparison of low- and high-temperature (30 and 330 K, respectively) emission spectra (c), and emission colors presented on the CIE 1931 chromaticity diagram (d). The related spectroscopic parameters of the emission patterns at each temperature are gathered in Table S35. The CIE 1931 chromaticity parameters, also determined at each temperature, are gathered in Table S36.

**Table S35** Selected spectroscopic parameters of the solid-state photoluminescent properties of **Re<sub>2</sub>-bpee** material, detected at various indicated temperatures (see Fig. S29), including emission pattern maxima ( $\lambda^{\max}$ ), the integral area under the emission peak ( $I$ ), and full width at half maximum for the emission band ( $FWHM$ ), as well as absolute quantum yield ( $\Phi_{em}$ , room-temperature value only).

| Re <sub>2</sub> -bpee |                                    |          |           |             |                                    |          |           |
|-----------------------|------------------------------------|----------|-----------|-------------|------------------------------------|----------|-----------|
| T / K                 | selected spectroscopic parameters  |          |           | T / K       | selected spectroscopic parameters  |          |           |
|                       | $\lambda^{\max}$ / nm <sup>a</sup> | I / a.u. | FWHM / nm |             | $\lambda^{\max}$ / nm <sup>a</sup> | I / a.u. | FWHM / nm |
| 30                    | <u>566</u> , 616, 672              | 86.7     | –         | 190         | 620                                | 138.2    | 130.3     |
| 40                    | <u>566</u> , 616, 672              | 85.4     | –         | 200         | 622                                | 137.7    | 129.8     |
| 50                    | <u>566</u> , 616, 672              | 81.9     | –         | 210         | 625                                | 137.3    | 129.2     |
| 60                    | <u>566</u> , 616, 672              | 81.9     | –         | 220         | 628                                | 136.8    | 128.4     |
| 70                    | <u>566</u> , 616, 672              | 82.0     | –         | 230         | 630                                | 136.5    | 127.8     |
| 80                    | <u>566</u> , 616, 672              | 83.3     | –         | 240         | 631                                | 136.5    | 128.0     |
| 90                    | <u>566</u> , 616, 672              | 84.5     | –         | 250         | 632                                | 136.4    | 128.0     |
| 100                   | <u>566</u> , 616, 672              | 89.2     | –         | 260         | 633                                | 136.5    | 128.0     |
| 110                   | <u>567</u> , 616, 672              | 94.1     | –         | 270         | 635                                | 136.5    | 127.8     |
| 120                   | <u>567</u> , 616, 672              | 104.0    | –         | 280         | 636                                | 136.5    | 127.8     |
| 130                   | 568, <u>616</u> , 672              | 114.4    | 125.1     | 290         | 638                                | 136.5    | 127.9     |
| 140                   | 568, <u>616</u> , 672              | 120.3    | 125.3     | 300         | 638                                | 136.5    | 127.9     |
| 150                   | 568, <u>616</u> , 672              | 126.4    | 126.8     | 310         | 639                                | 136.5    | 127.8     |
| 160                   | 617                                | 131.7    | 129.1     | 320         | 640                                | 136.4    | 127.9     |
| 170                   | 618                                | 137.1    | 130.7     | 330         | 641                                | 136.4    | 127.8     |
| 180                   | 619                                | 137.5    | 130.5     | $\Phi_{em}$ |                                    | 0.34     |           |

<sup>a</sup>For the temperature range of 30–150 K, two or more well-distinguished maxima on the emission pattern are observed. The position of the main maximum at each temperature was underlined.

**Table S36** The CIE 1931 chromaticity  $x$  and  $y$  parameters of the solid-state photoluminescent properties of **Re<sub>2</sub>-bpee** material, detected at various indicated temperatures (see Fig. S29), shown together with one-dimensional  $CCT$  (correlated color temperature) and  $Duv$  (Delta  $u,v$ ) metrics\* representing a chromaticity coordinate system.

| parameter                        |     | Re <sub>2</sub> -bpee |        |        |        |        |        |        |
|----------------------------------|-----|-----------------------|--------|--------|--------|--------|--------|--------|
|                                  |     | 30 K                  | 40 K   | 50 K   | 60 K   | 70 K   | 80 K   | 90 K   |
| CIE 1931 chromaticity parameters | $x$ | 0.541                 | 0.538  | 0.536  | 0.536  | 0.5353 | 0.537  | 0.538  |
|                                  | $y$ | 0.457                 | 0.454  | 0.451  | 0.450  | 0.450  | 0.450  | 0.451  |
| $CCT / K$                        |     | 2165                  | 2168   | 2172   | 2170   | 2169   | 2159   | 2151   |
| $Duv / a.u$                      |     | 0.0127                | 0.0119 | 0.0110 | 0.0108 | 0.0107 | 0.0108 | 0.011  |
|                                  |     | 100 K                 | 110 K  | 120 K  | 130 K  | 140 K  | 150 K  | 160 K  |
| CIE 1931 chromaticity parameters | $x$ | 0.540                 | 0.543  | 0.550  | 0.556  | 0.564  | 0.572  | 0.577  |
|                                  | $y$ | 0.448                 | 0.447  | 0.442  | 0.437  | 0.431  | 0.426  | 0.420  |
| $CCT / K$                        |     | 2121                  | 2094   | 2017   | 1955   | 1881   | 1819   | 1783   |
| $Duv / a.u$                      |     | 0.0105                | 0.0101 | 0.0092 | 0.0087 | 0.0083 | 0.0084 | 0.0080 |
|                                  |     | 170 K                 | 180 K  | 190 K  | 200 K  | 210 K  | 220 K  | 230 K  |
| CIE 1931 chromaticity parameters | $x$ | 0.582                 | 0.587  | 0.593  | 0.596  | 0.600  | 0.601  | 0.602  |
|                                  | $y$ | 0.416                 | 0.411  | 0.406  | 0.402  | 0.399  | 0.397  | 0.395  |
| $CCT / K$                        |     | 1754                  | 1731   | 1716   | 1713   | 1714   | 1717   | 1721   |
| $Duv / a.u$                      |     | 0.0091                | 0.0102 | 0.0119 | 0.0134 | 0.0153 | 0.0171 | 0.0185 |
|                                  |     | 240 K                 | 250 K  | 260 K  | 270 K  | 280 K  | 290 K  | 300 K  |
| CIE 1931 chromaticity parameters | $x$ | 0.605                 | 0.608  | 0.611  | 0.614  | 0.615  | 0.618  | 0.621  |
|                                  | $y$ | 0.392                 | 0.389  | 0.386  | 0.383  | 0.381  | 0.379  | 0.376  |
| $CCT / K$                        |     | 1730                  | 1746   | 1769   | 1795   | 1806   | 1837   | 1876   |
| $Duv / a.u$                      |     | 0.0209                | 0.0226 | 0.0260 | 0.0281 | 0.0292 | 0.0313 | 0.0337 |
|                                  |     | 310 K                 | 320 K  | 330 K  | -      | -      | -      | -      |
| CIE 1931 chromaticity parameters | $x$ | 0.622                 | 0.626  | 0.629  | -      | -      | -      | -      |
|                                  | $y$ | 0.374                 | 0.370  | 0.366  | -      | -      | -      | -      |
| $CCT / K$                        |     | 1893                  | 1955   | 2033   | -      | -      | -      | -      |
| $Duv / a.u$                      |     | 0.0354                | 0.0422 | 0.0499 | -      | -      | -      | -      |

\*The  $Duv$  and  $CCT$  quality parameters are commented on below the Table S28 (see above).

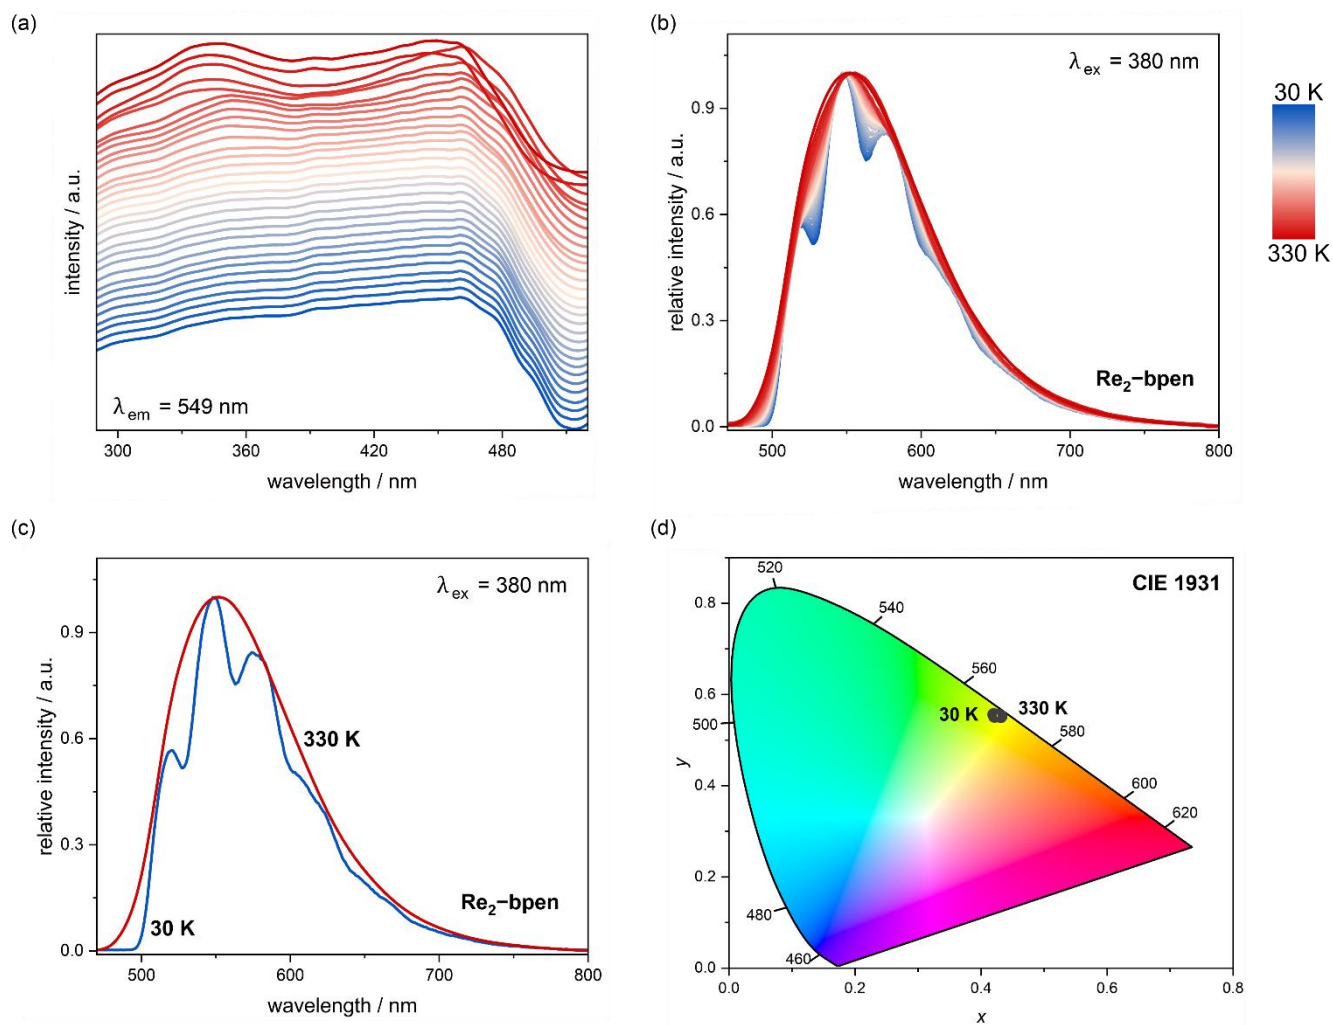

**Fig. S30** Solid-state photoluminescent properties of  $\text{Re}_2\text{-bpen}$ : temperature-variable solid-state excitation (a) and emission (b) spectra collected under the indicated excitation and emission wavelengths, gathered in the 30–330 K temperature range, comparison of low- and high-temperature (30 and 330 K, respectively) emission spectra (c), and emission colors presented on the CIE 1931 chromaticity diagram (d). The related spectroscopic parameters of the emission patterns at each temperature are gathered in Table S37. The CIE 1931 chromaticity parameters, also determined at each temperature, are gathered in Table S38.

**Table S37** Selected spectroscopic parameters of the solid-state photoluminescent properties of **Re<sub>2</sub>-bpen** material, detected at various indicated temperatures (see Fig. S30), including emission pattern maxima ( $\lambda^{\max}$ ), the integral area under the emission peak ( $I$ ), and full width at half maximum for the emission band ( $FWHM$ ), as well as absolute quantum yield ( $\Phi_{em}$ , room-temperature value only).

| Re <sub>2</sub> -bpen |                                    |            |             |             |                                    |            |             |
|-----------------------|------------------------------------|------------|-------------|-------------|------------------------------------|------------|-------------|
| T / K                 | selected spectroscopic parameters  |            |             | T / K       | selected spectroscopic parameters  |            |             |
|                       | $\lambda^{\max}$ / nm <sup>a</sup> | $I$ / a.u. | $FWHM$ / nm |             | $\lambda^{\max}$ / nm <sup>a</sup> | $I$ / a.u. | $FWHM$ / nm |
| 30                    | 520, <u>549</u> ,<br>576, 603      | 93.5       | 90.1        | 190         | <u>549</u> , 576                   | 100.3      | 93.8        |
| 40                    | 520, <u>549</u> ,<br>576, 603      | 93.4       | 88.8        | 200         | 549                                | 100.8      | 94.1        |
| 50                    | 520, <u>549</u> ,<br>576, 603      | 93.4       | 88.3        | 210         | 549                                | 101.3      | 94.5        |
| 60                    | 520, <u>549</u> ,<br>576, 603      | 93.1       | 88.0        | 220         | 549                                | 101.9      | 94.8        |
| 70                    | 520, <u>549</u> ,<br>576, 603      | 93.1       | 88.4        | 230         | 549                                | 102.1      | 94.8        |
| 80                    | 520, <u>549</u> ,<br>576, 603      | 93.5       | 88.8        | 240         | 549                                | 101.8      | 94.9        |
| 90                    | 520, <u>549</u> ,<br>576, 603      | 93.8       | 88.9        | 250         | 549                                | 103.1      | 95.4        |
| 100                   | 520, <u>549</u> ,<br>576           | 94.1       | 89.4        | 260         | 549                                | 103.7      | 95.6        |
| 110                   | 520, <u>549</u> ,<br>576           | 94.7       | 89.8        | 270         | 549                                | 104.0      | 95.6        |
| 120                   | <u>549</u> , 576                   | 95.2       | 89.9        | 280         | 549                                | 103.6      | 95.8        |
| 130                   | <u>549</u> , 576                   | 96.2       | 91.2        | 290         | 549                                | 103.9      | 96.4        |
| 140                   | <u>549</u> , 576                   | 96.3       | 91.5        | 300         | 549                                | 105.3      | 96.7        |
| 150                   | <u>549</u> , 576                   | 97.6       | 92.0        | 310         | 549                                | 105.7      | 96.5        |
| 160                   | <u>549</u> , 576                   | 98.3       | 92.8        | 320         | 549                                | 106.6      | 97.0        |
| 170                   | <u>549</u> , 576                   | 99.0       | 93.1        | 330         | 549                                | 108.3      | 97.7        |
| 180                   | <u>549</u> , 576                   | 99.5       | 93.2        | $\Phi_{em}$ |                                    | 0.64       |             |

<sup>a</sup>For the temperature range of 30–190 K, two or more well-distinguished maxima on the emission pattern are observed. The position of the main maximum at each temperature was underlined.



**Table S38** The CIE 1931 chromaticity  $x$  and  $y$  parameters of the solid-state photoluminescent properties of **Re<sub>2</sub>-bpen** material, detected at various indicated temperatures (see Fig. S30), shown together with one-dimensional  $CCT$  (correlated color temperature) and  $Duv$  (Delta  $u,v$ ) metrics\* representing a chromaticity coordinate system.

| parameter                        |     | Re <sub>2</sub> -bpen |        |        |        |        |        |        |
|----------------------------------|-----|-----------------------|--------|--------|--------|--------|--------|--------|
|                                  |     | 30 K                  | 40 K   | 50 K   | 60 K   | 70 K   | 80 K   | 90 K   |
| CIE 1931 chromaticity parameters | $x$ | 0.431                 | 0.430  | 0.429  | 0.428  | 0.428  | 0.428  | 0.428  |
|                                  | $y$ | 0.551                 | 0.552  | 0.553  | 0.554  | 0.554  | 0.555  | 0.555  |
| $CCT / K$                        |     | 3906                  | 3929   | 3946   | 3960   | 3970   | 3969   | 3973   |
| $Duv / a.u$                      |     | 0.0517                | 0.0523 | 0.0527 | 0.0532 | 0.0534 | 0.0534 | 0.0535 |
|                                  |     | 100 K                 | 110 K  | 120 K  | 130 K  | 140 K  | 150 K  | 160 K  |
| CIE 1931 chromaticity parameters | $x$ | 0.428                 | 0.428  | 0.428  | 0.428  | 0.428  | 0.429  | 0.429  |
|                                  | $y$ | 0.555                 | 0.554  | 0.554  | 0.554  | 0.553  | 0.554  | 0.553  |
| $CCT / K$                        |     | 3973                  | 3969   | 3967   | 3963   | 3963   | 3955   | 3945   |
| $Duv / a.u$                      |     | 0.0535                | 0.0533 | 0.0533 | 0.0531 | 0.0532 | 0.0530 | 0.0527 |
|                                  |     | 170 K                 | 180 K  | 190 K  | 200 K  | 210 K  | 220 K  | 230 K  |
| CIE 1931 chromaticity parameters | $x$ | 0.430                 | 0.429  | 0.428  | 0.428  | 0.427  | 0.428  | 0.427  |
|                                  | $y$ | 0.553                 | 0.553  | 0.553  | 0.553  | 0.553  | 0.553  | 0.553  |
| $CCT / K$                        |     | 3937                  | 3942   | 3957   | 3957   | 3970   | 3968   | 3977   |
| $Duv / a.u$                      |     | 0.0525                | 0.0526 | 0.0529 | 0.0527 | 0.0530 | 0.0530 | 0.0532 |
|                                  |     | 240 K                 | 250 K  | 260 K  | 270 K  | 280 K  | 290 K  | 300 K  |
| CIE 1931 chromaticity parameters | $x$ | 0.426                 | 0.426  | 0.425  | 0.424  | 0.423  | 0.424  | 0.423  |
|                                  | $y$ | 0.553                 | 0.553  | 0.553  | 0.554  | 0.553  | 0.554  | 0.554  |
| $CCT / K$                        |     | 3986                  | 3988   | 4000   | 4018   | 4037   | 4028   | 403    |
| $Duv / a.u$                      |     | 0.0533                | 0.0534 | 0.0536 | 0.0538 | 0.0542 | 0.0543 | 0.0543 |
|                                  |     | 310 K                 | 320 K  | 330 K  | -      | -      | -      | -      |
| CIE 1931 chromaticity parameters | $x$ | 0.421                 | 0.421  | 0.420  | -      | -      | -      | -      |
|                                  | $y$ | 0.552                 | 0.554  | 0.554  | -      | -      | -      | -      |
| $CCT / K$                        |     | 4050                  | 4061   | 4075   | -      | -      | -      | -      |
| $Duv / a.u$                      |     | 0.0545                | 0.0547 | 0.0550 | -      | -      | -      | -      |

\*The  $Duv$  and  $CCT$  quality parameters are commented on below the Table S28 (see above).

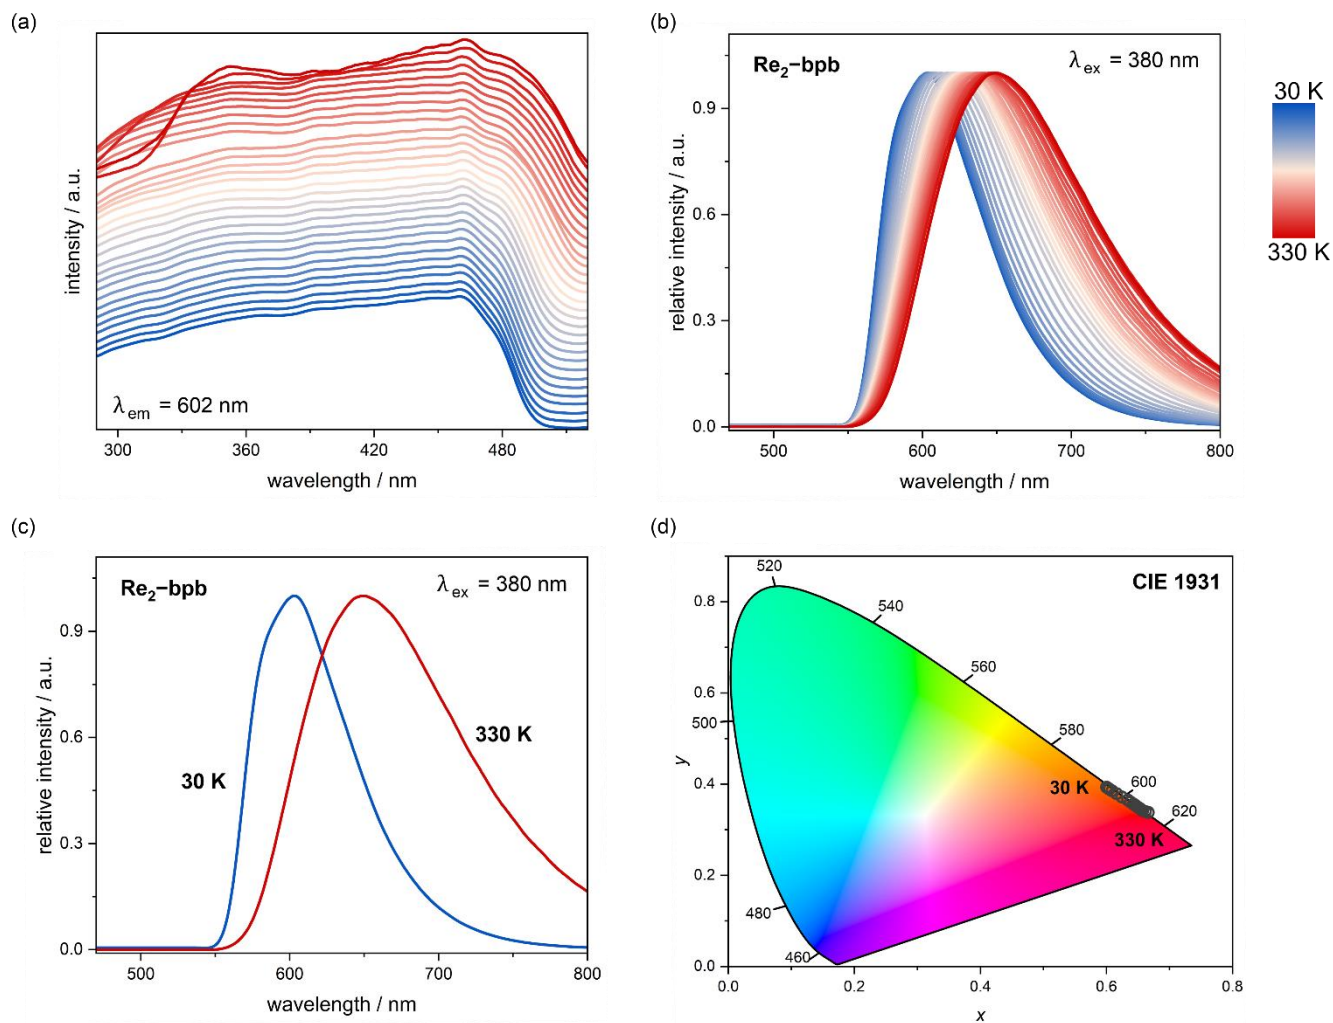

**Fig. S31** Solid-state photoluminescent properties of  $\text{Re}_2\text{-bpb}$ : temperature-variable solid-state excitation (a) and emission (b) spectra collected under the indicated excitation and emission wavelengths, gathered in the 30–330 K temperature range, comparison of low- and high-temperature (30 and 330 K, respectively) emission spectra (c), and emission colors presented on the CIE 1931 chromaticity diagram (d). The related spectroscopic parameters of the emission patterns at each temperature are gathered in Table S39. The CIE 1931 chromaticity parameters, also determined at each temperature, are gathered in Table S40.

**Table S39** Selected spectroscopic parameters of the solid-state photoluminescent properties of **Re<sub>2</sub>-bpb** material, detected at various indicated temperatures (see Fig. S31), including emission pattern maxima ( $\lambda^{\text{max}}$ ), the integral area under the emission peak ( $I$ ), and full width at half maximum for the emission band ( $FWHM$ ), as well as absolute quantum yield ( $\Phi_{\text{em}}$ , room-temperature value only).

| Re <sub>2</sub> -bpb |                                   |            |             |                    |                                   |            |             |
|----------------------|-----------------------------------|------------|-------------|--------------------|-----------------------------------|------------|-------------|
| T / K                | selected spectroscopic parameters |            |             | T / K              | selected spectroscopic parameters |            |             |
|                      | $\lambda^{\text{max}}$ / nm       | $I$ / a.u. | $FWHM$ / nm |                    | $\lambda^{\text{max}}$ / nm       | $I$ / a.u. | $FWHM$ / nm |
| 30                   | 602                               | 84.8       | 77.8        | 190                | 627                               | 119.4      | 107.9       |
| 40                   | 603                               | 85.2       | 77.8        | 200                | 629                               | 121.2      | 109.6       |
| 50                   | 603                               | 85.2       | 77.8        | 210                | 631                               | 122.5      | 111.1       |
| 60                   | 604                               | 85.6       | 77.9        | 220                | 632                               | 124.5      | 113.3       |
| 70                   | 603                               | 86.4       | 78.6        | 230                | 635                               | 126.4      | 114.8       |
| 80                   | 605                               | 87.4       | 79.3        | 240                | 636                               | 128.9      | 117.2       |
| 90                   | 605                               | 89.3       | 80.6        | 250                | 637                               | 131.0      | 119.4       |
| 100                  | 607                               | 92.2       | 83.0        | 260                | 640                               | 132.5      | 120.6       |
| 110                  | 608                               | 95.2       | 85.7        | 270                | 642                               | 133.6      | 121.7       |
| 120                  | 609                               | 98.5       | 88.6        | 280                | 644                               | 135.7      | 123.9       |
| 130                  | 612                               | 102.2      | 91.9        | 290                | 644                               | 137.8      | 125.3       |
| 140                  | 617                               | 105.9      | 95.4        | 300                | 645                               | 140.6      | 128.1       |
| 150                  | 620                               | 109.8      | 98.8        | 310                | 648                               | 143.5      | 130.9       |
| 160                  | 621                               | 112.5      | 101.2       | 320                | 647                               | 147.5      | 134.7       |
| 170                  | 624                               | 115.1      | 103.8       | 330                | 648                               | 151.4      | 138.3       |
| 180                  | 626                               | 117.3      | 105.7       | $\Phi_{\text{em}}$ |                                   | 0.41       |             |

**Table S40** The CIE 1931 chromaticity  $x$  and  $y$  parameters of the solid-state photoluminescent properties of **Re<sub>2</sub>-bpb** material, detected at various indicated temperatures (see Fig. S31), shown together with one-dimensional  $CCT$  (correlated color temperature) and  $Duv$  (Delta  $u,v$ ) metrics\* representing a chromaticity coordinate system.

| parameter                        |     | Re <sub>2</sub> -bpb |        |        |        |        |        |        |
|----------------------------------|-----|----------------------|--------|--------|--------|--------|--------|--------|
|                                  |     | 30 K                 | 40 K   | 50 K   | 60 K   | 70 K   | 80 K   | 90 K   |
| CIE 1931 chromaticity parameters | $x$ | 0.600                | 0.601  | 0.602  | 0.603  | 0.605  | 0.607  | 0.609  |
|                                  | $y$ | 0.393                | 0.392  | 0.391  | 0.390  | 0.389  | 0.387  | 0.385  |
| $CCT / K$                        |     | 1721                 | 1724   | 1727   | 1732   | 1738   | 1749   | 1763   |
| $Duv / a.u$                      |     | 0.0164               | 0.0171 | 0.0177 | 0.0185 | 0.0196 | 0.0214 | 0.0235 |
|                                  |     | 100 K                | 110 K  | 120 K  | 130 K  | 140 K  | 150 K  | 160 K  |
| CIE 1931 chromaticity parameters | $x$ | 0.612                | 0.616  | 0.620  | 0.624  | 0.630  | 0.634  | 0.636  |
|                                  | $y$ | 0.382                | 0.379  | 0.376  | 0.372  | 0.368  | 0.365  | 0.363  |
| $CCT / K$                        |     | 1790                 | 1826   | 1872   | 1933   | 2012   | 2084   | 2138   |
| $Duv / a.u$                      |     | 0.0270               | 0.0312 | 0.0361 | 0.0421 | 0.0498 | 0.0560 | 0.0604 |
|                                  |     | 170 K                | 180 K  | 190 K  | 200 K  | 210 K  | 220 K  | 230 K  |
| CIE 1931 chromaticity parameters | $x$ | 0.639                | 0.641  | 0.643  | 0.644  | 0.646  | 0.648  | 0.649  |
|                                  | $y$ | 0.361                | 0.358  | 0.356  | 0.355  | 0.353  | 0.352  | 0.350  |
| $CCT / K$                        |     | 2203                 | 2264   | 2328   | 2385   | 2439   | 2491   | 2542   |
| $Duv / a.u$                      |     | 0.0655               | 0.0702 | 0.0750 | 0.0790 | 0.0829 | 0.0865 | 0.0898 |
|                                  |     | 240 K                | 250 K  | 260 K  | 270 K  | 280 K  | 290 K  | 300 K  |
| CIE 1931 chromaticity parameters | $x$ | 0.650                | 0.652  | 0.653  | 0.655  | 0.656  | 0.658  | 0.659  |
|                                  | $y$ | 0.349                | 0.348  | 0.346  | 0.345  | 0.343  | 0.342  | 0.341  |
| $CCT / K$                        |     | 2592                 | 2649   | 2709   | 2772   | 2852   | 2908   | 2961   |
| $Duv / a.u$                      |     | 0.0932               | 0.0968 | 0.1007 | 0.1048 | 0.1095 | 0.1130 | 0.1165 |
|                                  |     | 310 K                | 320 K  | 330 K  | -      | -      | -      | -      |
| CIE 1931 chromaticity parameters | $x$ | 0.662                | 0.663  | 0.666  | -      | -      | -      | -      |
|                                  | $y$ | 0.340                | 0.338  | 0.338  | -      | -      | -      | -      |
| $CCT / K$                        |     | 3042                 | 3112   | 3190   | -      | -      | -      | -      |
| $Duv / a.u$                      |     | 0.1217               | 0.1256 | 0.1311 | -      | -      | -      | -      |

\*The  $Duv$  and  $CCT$  quality parameters are commented on below the Table S28 (see above).

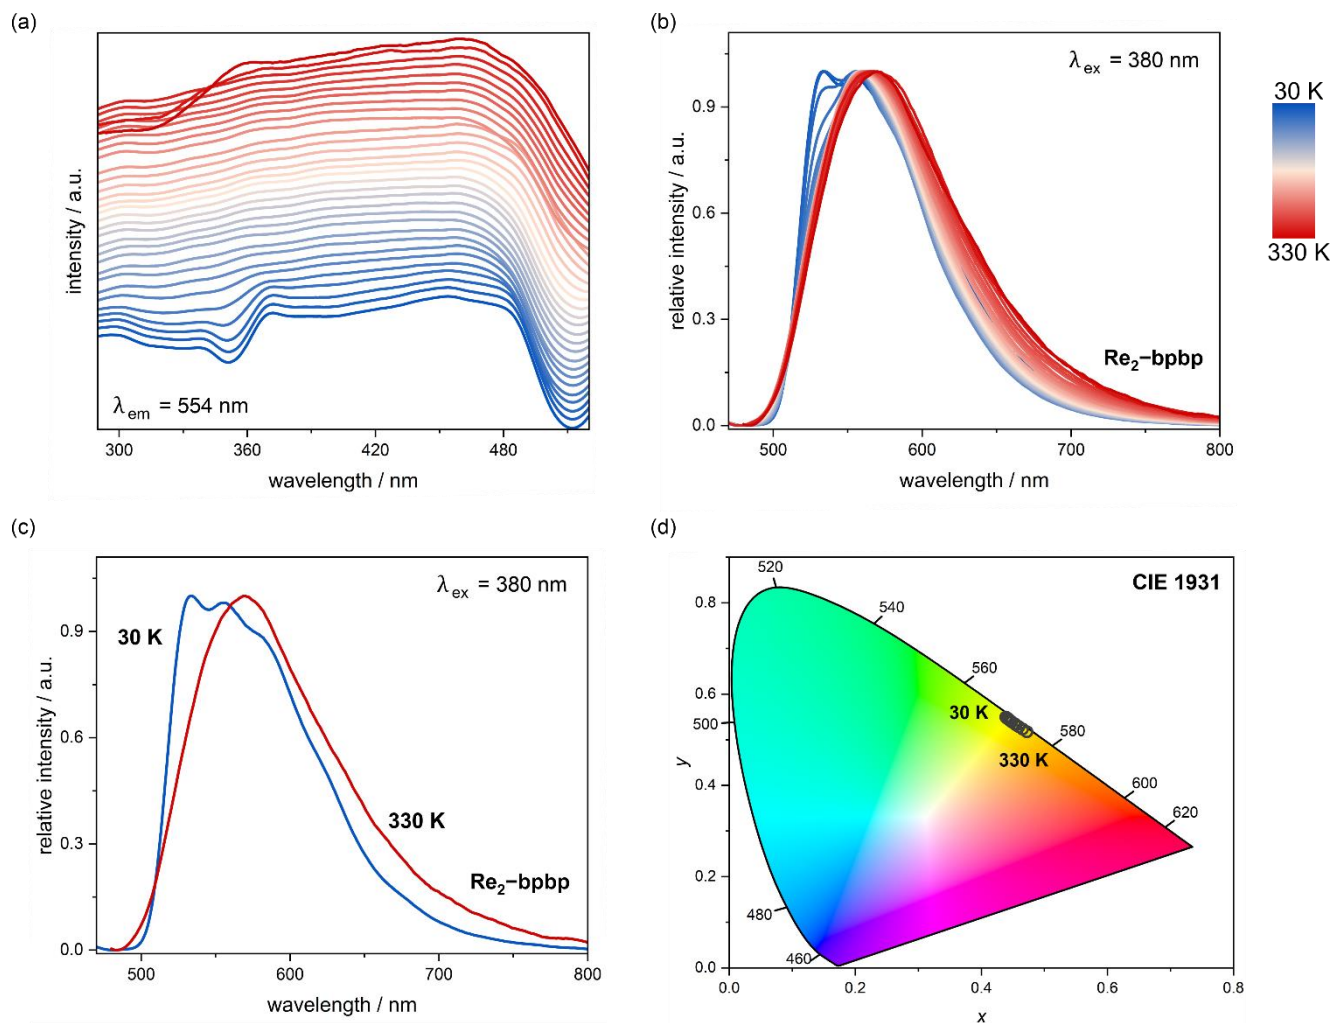

**Fig. S32** Solid-state photoluminescent properties of  $\text{Re}_2\text{-bpbp}$ : temperature-variable solid-state excitation (a) and emission (b) spectra collected under the indicated excitation and emission wavelengths, gathered in the 30–330 K temperature range, comparison of low- and high-temperature (30 and 330 K, respectively) emission spectra (c), and emission colors presented on the CIE 1931 chromaticity diagram (d). The related spectroscopic parameters of the emission patterns at each temperature are gathered in Table S41. The CIE 1931 chromaticity parameters, also determined at each temperature, are gathered in Table S42.

**Table S41** Selected spectroscopic parameters of the solid-state photoluminescent properties of **Re<sub>2</sub>-bpbp** material, detected at various indicated temperatures (see Fig. S32), including emission pattern maxima ( $\lambda^{\max}$ ), the integral area under the emission peak ( $I$ ), and full width at half maximum for the emission band ( $FWHM$ ), as well as absolute quantum yield ( $\Phi_{em}$ , room-temperature value only).

| <b>Re<sub>2</sub>-bpbp</b> |                                    |                 |                  |              |                                    |                 |                  |
|----------------------------|------------------------------------|-----------------|------------------|--------------|------------------------------------|-----------------|------------------|
| <i>T</i> / K               | selected spectroscopic parameters  |                 |                  | <i>T</i> / K | selected spectroscopic parameters  |                 |                  |
|                            | $\lambda^{\max}$ / nm <sup>a</sup> | <i>I</i> / a.u. | <i>FWHM</i> / nm |              | $\lambda^{\max}$ / nm <sup>a</sup> | <i>I</i> / a.u. | <i>FWHM</i> / nm |
| 30                         | 533, <u>554</u>                    | 113.3           | 107.7            | 190          | 557                                | 103.9           | 94.4             |
| 40                         | 533, <u>554</u>                    | 113.1           | 107.1            | 200          | 557                                | 105.4           | 95.9             |
| 50                         | 533, <u>554</u>                    | 110.1           | 103.7            | 210          | 557                                | 106.8           | 97.0             |
| 60                         | 554.5                              | 102.9           | 96.2             | 220          | 557                                | 107.8           | 97.9             |
| 70                         | 554.5                              | 97.7            | 91.1             | 230          | 558                                | 109.9           | 99.4             |
| 80                         | 555                                | 95.8            | 89.0             | 240          | 558.5                              | 111.1           | 100.6            |
| 90                         | 555                                | 95.2            | 88.3             | 250          | 559                                | 112.4           | 101.9            |
| 100                        | 555                                | 96.3            | 88.8             | 260          | 559                                | 114.5           | 103.4            |
| 110                        | 555                                | 97.1            | 89.5             | 270          | 561                                | 115.6           | 104.0            |
| 120                        | 555.5                              | 97.6            | 89.8             | 280          | 561                                | 117.3           | 105.4            |
| 130                        | 555.5                              | 98.5            | 90.4             | 290          | 562                                | 118.9           | 107.2            |
| 140                        | 556                                | 98.9            | 90.7             | 300          | 564                                | 120.6           | 108.3            |
| 150                        | 556                                | 100.3           | 91.8             | 310          | 565                                | 123.0           | 110.8            |
| 160                        | 556.5                              | 101.2           | 92.4             | 320          | 567                                | 124.3           | 111.5            |
| 170                        | 556.5                              | 101.8           | 93.0             | 330          | 569                                | 124.8           | 112.5            |
| 180                        | 556.5                              | 103.0           | 93.7             | $\Phi_{em}$  |                                    | 0.71            |                  |

<sup>a</sup>For the temperature range of 30–50 K, two well-distinguished maxima on the emission pattern are observed. The position of the main maximum at each temperature was underlined.

**Table S42** The CIE 1931 chromaticity  $x$  and  $y$  parameters of the solid-state photoluminescent properties of **Re<sub>2</sub>-bpbp** material, detected at various indicated temperatures (see Fig. S32), shown together with one-dimensional  $CCT$  (correlated color temperature) and  $Duv$  (Delta  $u,v$ ) metrics\* representing a chromaticity coordinate system.

| parameter                        |     | Re <sub>2</sub> -bpbp |        |        |        |        |        |        |
|----------------------------------|-----|-----------------------|--------|--------|--------|--------|--------|--------|
|                                  |     | 30 K                  | 40 K   | 50 K   | 60 K   | 70 K   | 80 K   | 90 K   |
| CIE 1931 chromaticity parameters | $x$ | 0.442                 | 0.441  | 0.441  | 0.440  | 0.439  | 0.439  | 0.439  |
|                                  | $y$ | 0.546                 | 0.546  | 0.547  | 0.548  | 0.550  | 0.550  | 0.549  |
| $CCT / K$                        |     | 3747                  | 3755   | 3764   | 3785   | 3802   | 3805   | 3797   |
| $Duv / a.u$                      |     | 0.0480                | 0.0483 | 0.0486 | 0.0492 | 0.0497 | 0.0498 | 0.0496 |
|                                  |     | 100 K                 | 110 K  | 120 K  | 130 K  | 140 K  | 150 K  | 160 K  |
| CIE 1931 chromaticity parameters | $x$ | 0.441                 | 0.442  | 0.442  | 0.443  | 0.443  | 0.444  | 0.444  |
|                                  | $y$ | 0.547                 | 0.546  | 0.546  | 0.545  | 0.545  | 0.544  | 0.544  |
| $CCT / K$                        |     | 3761                  | 3743   | 3738   | 3727   | 3721   | 3704   | 3706   |
| $Duv / a.u$                      |     | 0.0486                | 0.0481 | 0.0479 | 0.0476 | 0.0474 | 0.0469 | 0.0469 |
|                                  |     | 170 K                 | 180 K  | 190 K  | 200 K  | 210 K  | 220 K  | 230 K  |
| CIE 1931 chromaticity parameters | $x$ | 0.445                 | 0.445  | 0.446  | 0.447  | 0.448  | 0.450  | 0.453  |
|                                  | $y$ | 0.543                 | 0.542  | 0.541  | 0.540  | 0.539  | 0.537  | 0.535  |
| $CCT / K$                        |     | 3694                  | 3687   | 3673   | 3653   | 3634   | 3607   | 3555   |
| $Duv / a.u$                      |     | 0.0466                | 0.0463 | 0.0459 | 0.0454 | 0.0448 | 0.0441 | 0.0427 |
|                                  |     | 240 K                 | 250 K  | 260 K  | 270 K  | 280 K  | 290 K  | 300 K  |
| CIE 1931 chromaticity parameters | $x$ | 0.453                 | 0.455  | 0.458  | 0.460  | 0.462  | 0.465  | 0.469  |
|                                  | $y$ | 0.534                 | 0.532  | 0.530  | 0.528  | 0.526  | 0.523  | 0.520  |
| $CCT / K$                        |     | 3547                  | 3514   | 3474   | 3438   | 3391   | 3342   | 3277   |
| $Duv / a.u$                      |     | 0.0425                | 0.0416 | 0.0406 | 0.0396 | 0.0384 | 0.0372 | 0.0356 |
|                                  |     | 310 K                 | 320 K  | 330 K  | -      | -      | -      | -      |
| CIE 1931 chromaticity parameters | $x$ | 0.472                 | 0.469  | 0.472  | -      | -      | -      | -      |
|                                  | $y$ | 0.518                 | 0.520  | 0.517  | -      | -      | -      | -      |
| $CCT / K$                        |     | 3232                  | 3278   | 3223   | -      | -      | -      | -      |
| $Duv / a.u$                      |     | 0.0345                | 0.0357 | 0.0343 | -      | -      | -      | -      |

\*The  $Duv$  and  $CCT$  quality parameters are commented on below the Table S28 (see above).

## Description of the molecular DFT/TD-DFT theoretical calculations

To elucidate and better understand the underlying mechanism of the strong light absorption in the UV-vis range and visible emission, the DFT/TD-DFT methodology was considered. Initially, calculations were performed using the Gaussian 16 software<sup>57</sup> employing the PBE0 exchange-correlation functional<sup>58</sup> with a Def2TZVP basis set.<sup>59</sup> Additionally, for the core electrons of Re(V) centers a suitable pseudo-potential was used (treating 15 valence electrons per Re(V) center), and the pseudopotential was parameterized to include scalar relativistic effects. Only the anionic dinuclear molecular fragments consisting of the two Re(V) centers (with CN<sup>-</sup> and N<sup>3-</sup> ligands) linked by a bridging ligand were studied, completely omitting the counterions present in the crystal structure. To compensate for the lack of a natural crystal matrix in which the considered anions are embedded all computations were done in the presence of solvent within the Polarizable Continuum Model (PCM), using solvation parameters for methanol.<sup>510</sup>

For geometry optimizations, the PBE0 functional was coupled with the D3 version of Grimme's post-SCF dispersion correction with Becke-Johnson damping included, i.e., GD3BJ.<sup>511</sup> In the first step, we tried to optimize the geometries from XRD experiments with VeryTight convergence criteria. However, it was found that in general the calculated frequencies from the Hessians were not free of considerable imaginary components connected with twisting of aromatic ring planes within extended ligands. It was checked that in most cases there is effectively negligible energy barrier associated with rotating the rings. Considering this fact it was decided to perform subsequent TD-DFT calculations using the geometry of the ground singlet state taken from the XRD experiments (100 K) where the rings are firmly held in well-defined positions by hydrogen bonds and other intramolecular interactions present in the crystal.

To simulate absorption spectra, the first hundred excited singlets were optimized using TD-DFT<sup>512</sup> out of which energy and oscillator strengths of the first three were gathered in Tables S44, S46, S48, S50, S52, S54, S56, and S58, and compared with the experimental spectra in Fig. S33–S40. Selected electron transitions between ground and excited states are also presented in Fig. S33–S40. The energy of TD-DFT excitations is comparable with experimental data. It should be noted that our TD-DFT treatment lacks the inclusion of spin-orbit relativistic effects – scalar relativistic effects within the ZORA approximation are included within the employed effective core potential for Re – and the missing relativistic effects should be expected to broaden the spectra, where they completely accounted for.

To identify a possible mechanism of emission, we optimized the geometries of the first excited triplets (T1) and the first excited singlets (S1) for all of the molecules and compared the energies to the experimental low-temperature luminescence spectra (Fig. S33–S40) interpreting transitions as vertical ones to the ground state. In all **Re<sub>2</sub>-L** materials, both ground states are of similar topologies and centered on the metal  $d_{xy}$  orbital, with significant contributions from the  $p_{\pi}$  (non-bonding) orbitals of the cyanido ligands.

In **Re<sub>2</sub>-CN**, the triplet excited states consist mainly of a  $p^*$  interaction between the nitrido  $p_{\pi}$  orbitals and the  $d_{xz}$  and  $d_{yz}$  orbitals located on the rhenium(5+) ions or are delocalized on both metal ions and the cyanido bridge between them. Similarly, the excited states in **Re<sub>2</sub>-en** are composed of nitrido  $p_{\pi}$  orbitals and the rhenium  $d_{xz}$  and  $d_{yz}$  orbitals, but with a much larger contribution to the perpendicular cyanido  $p_{\pi}$  orbitals of ligands. The computed emission wavelengths for both compounds are comparable to the experimental value, and they can be assigned to  $(d_{xy})^2 \leftarrow (d_{xy})^1(d_{\pi^*})^1$  ( $d_{\pi^*} = d_{xz}, d_{yz}$ ) transition with  $d_{\pi}-p_{\pi}(L)$  (L = nitrido and cyanido) overlap (or <sup>3</sup>MLCT+d-d involving the nitrido ligand).

In **Re<sub>2</sub>-bpy**, **Re<sub>2</sub>-bpac**, **Re<sub>2</sub>-bpee**, and **Re<sub>2</sub>-bpb**, there is a remarkable difference in the transition mechanism. In all complexes in this group, the emission transition is reasonably attributed to the  $(d_{xy})^2 \leftarrow \pi^*$  (ligand) charge transfer with small contributions from cyanido ligands to the ground state. The most complex composition of the excited



emissive state was calculated for **Re<sub>2</sub>-bpen** and **Re<sub>2</sub>-bpbp**. Part of their emissive states is located on the  $\pi^*$  orbitals of aromatic fragments of organic ligands, while the others are mainly calculated to be at side fragments of the molecule. These states are mainly delocalized within metal complexes and mostly result from the Re(V)  $d_{xz}$  or  $d_{yz}$  and nitrido  $p_\pi$  orbitals, however small contributions of cyanido ligands and pyridine heterocyclic ring can be also included. It follows that in the case of both these compounds, the luminescence is described by a mixed mechanism, from the rhenium(V)-centered  $^3[(d_{xy})^1(d_{\pi^*})^1]$  and  $^3\text{MLCT}$  states. It is worth noting, that the calculated transitions from  $^3\text{MLCT}$  states in **Re<sub>2</sub>-bpy**, **Re<sub>2</sub>-bpac**, **Re<sub>2</sub>-bpee**, and **Re<sub>2</sub>-bpb**, are much higher in energy (below 400 nm) and significantly differ from the experimentally observed emission bands. In the case of **Re<sub>2</sub>-bpen** and **Re<sub>2</sub>-bpbp**, these states are much closer to the experimental bands, so they were included in the analysis. Moreover, these conclusions are confirmed experimentally (see the main text). The whole postulated path of excitation involving the ca. 380 nm light involves consecutive non-emissive intersystem crossing with geometry relaxation of triplet excited states and final slow phosphorescence emission back to the ground singlet.

Seeking a more refined treatment that would include relativistic vector effects (spin-orbit coupling) we turned our attention to the ORCA 5.0.3 quantum chemistry program package.<sup>S13</sup> Here, the set of new theoretical calculations was carried out for **Re<sub>2</sub>-bpy** and **Re<sub>2</sub>-bpee** once again using the experimental geometry of an anion complex  $\{[\text{Re}^{\text{V}}(\text{CN})_4(\text{N})](\text{L})\}^{2-}$ , consisting of the two Re(V) centers (with  $\text{CN}^-$  and  $\text{N}^{3-}$  ligands) linked by a bridging ligand. The counter ions and solvent molecules present in the crystal structure were again completely omitted. This time the B3LYP hybrid exchange-correlation energy functional was employed,<sup>S14,S15</sup> which presented its reasonable performance for predicting the geometry parameters of ground and excited states, as well as, excitation energies for various organic and metal transition compounds.<sup>S16,S17</sup> The def2-TZVP basis set was used together with the charge-dependent atom-pairwise dispersion correction using D4(EEQ)-ATM model.<sup>S9,S18</sup>

For the calculations, the LR-CPCM solvation model was used with chloroform as a solvent.<sup>S19</sup> The restricted KS determinant of a ground state served then as a reference one for the SOC TD-DFT calculations in the next step. To simulate UV-vis spectra, singlet excited states were optimized using TD-DFT and then mixed with calculated triplet excited states for the experimental geometry. Scalar relativistic effects were included using the 0<sup>th</sup> order regular approximation (ZORA)<sup>S20,S21</sup> with a compatible segmented all-electron relativistically contracted basis set SARC-ZORA-TZVP with SARC/J option (general-purpose Coulomb fitting basis set for all-electron calculations which reduces to def2/J for atoms up to Kr and specially implemented auxiliary basis set for atoms beyond Kr, that is Re in this case).<sup>S22,S23</sup> To accelerate the computation of two-electron integrals, in addition to the resolution of identity approximation for the Coulomb part (RIJ), the chain of spheres algorithm for the exchange part (COSX) was used.<sup>S24,S25</sup> The spin-orbit integrals were calculated using the RI-SOMF(1X) approximation that is: using mean-field potential with the inclusion of 1-electron terms together with Coulomb term computed with RI approximation and exchange terms evaluated via one-center exact integrals including the spin-other orbit interaction omitting DFT local correlation terms.<sup>S26</sup> The maximum number of centers to include in the integrals was set to 4.

The list of the selected lowest energy excited singlet states (for the geometry of the ground state optimized in the previous step) is presented in Tables S59 and S61, together with SOC states obtained by mixing singlets and triplets with the calculated SO-coupling. The theoretical UV-vis spectra from Fig. S41 and S44 were simulated using the orca\_mapspc tool with a broadening of  $1800\text{ cm}^{-1}$  for singlets only (TD-DFT) and spin-orbit states (SOC-corrected) compared to the experimental one. The relevant molecular orbitals with the highest contribution to the first singlet and triplet states (Tables S59 and S61) are presented in Fig. S41 and S44.

To better understand the mechanism of absorption (and later the emission from those levels), difference electron density maps for the first 10 excited SO-states were plotted in Fig. S41 and S44. After the inspection, it can be seen

that the transitions are of rhenium-centered d-d and metal-to-ligand charge transfer (MLCT) character with a slight admixture of cyanido and nitrido ligands.

In the last step, to better elucidate the observed luminescence, we simply performed the geometry optimization of the first excited SO-state taking advantage of the possibility to calculate Hessians for mixed SO states in ORCA software. After the optimization, we presented the first few relevant SOC corrected states for the new geometry in Tables S60 and S62 together with the MOs in Fig. S42 and S45. The computed emission wavelengths for both compounds are comparable to the experimental value and can be reasonably attributed to the  $(d_{xy})^2 \leftarrow \pi^*$  (ligand) charge transfer transition with small contributions from CN ligands to the ground state. The obtained energies of SO-states were compared with the emission spectra of **Re<sub>2</sub>-bpy** and **Re<sub>2</sub>-bpee**. We did not present relative intensities and therefore lifetimes of the simulated emission bands based on calculated dipole-transition moments, because of the significant impact of vibronic coupling and intersystem crossing rates whose simulations are beyond the scope of this work.

The set of representative results of the described molecular DFT/TD-DFT calculations is included in the following Fig. S33–S46 and Tables S43–S62. Next, in this Supporting Information, the periodic theoretical calculations are described (see below Table S62 and the next pages).

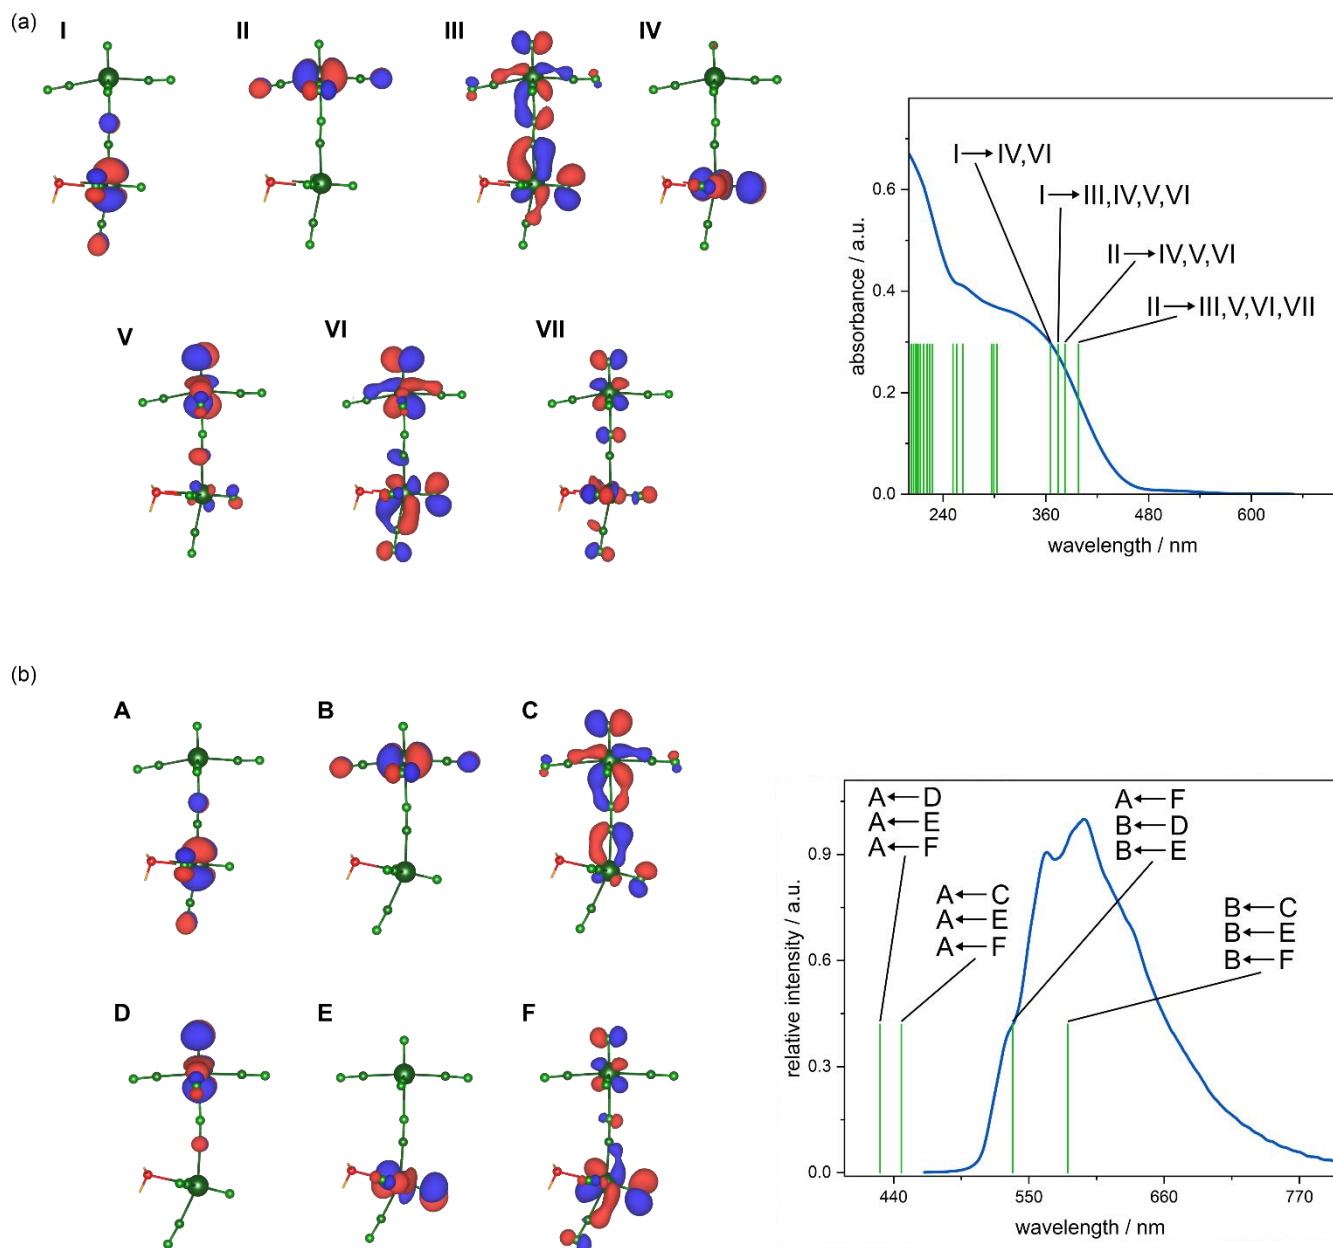

**Fig. S33** Contour plots of chosen MO corresponding to the TD-DFT singlet excitations (a) as well as for optimized excited triplet state geometry (b) in **Re<sub>2</sub>-CN**, together with the comparison of solid-state UV-vis absorption spectra with the excitation energies predicted for the lowest energy excited states and comparison of the low-temperature emission spectrum (30 K) with the emission energies predicted for the lowest energy excited states using the TD-DFT theoretical calculations (green lines). The contours of MO are presented with a 0.05 isovalue level. The transition(s) energies are presented in Table S44.

**Table S43** Selected optimized and experimental bond lengths and angles for complexes in **Re<sub>2</sub>-CN** (see **Description of the molecular DFT/TD-DFT theoretical calculations** on Page S88 for details).

| structure      | parameters / Å, °     |                        |                        |                          |                           |
|----------------|-----------------------|------------------------|------------------------|--------------------------|---------------------------|
|                | Re1/Re2≡N             | Re-C                   | Re1/Re2-N              | N≡Re-C (av.)             | N-Re1/Re2≡N               |
| SC-XRD (100 K) | 1.654(4)/<br>1.670(4) | 2.092(5) –<br>2.109(5) | 2.340(4) /<br>2.422(3) | 85.43(16) –<br>91.31(17) | 176.99(15)/<br>179.70(15) |
| ground state   | 1.654/1.670           | 2.10 – 2.11            | 2.422/2.339            | 95.66 – 101.12           | 176.83/179.32             |
| excited state  | 1.748/1.651           | 2.09 – 2.13            | 2.572/2.351            | 92.68 – 99.71            | 179.32/176.83             |

**Table S44** The excitation energies of the lowest energy excited states and emission energies predicted for the lowest energy excited states using the TD-DFT calculations in **Re<sub>2</sub>-CN** (green lines in Fig. S33).

| <b>Re<sub>2</sub>-CN</b>              |                                                                     |                                                 |                                                                |                                              |
|---------------------------------------|---------------------------------------------------------------------|-------------------------------------------------|----------------------------------------------------------------|----------------------------------------------|
| DFT lowest energy singlet excitations |                                                                     |                                                 |                                                                |                                              |
| transition(s)<br>(% contribution)     | II → III (61 %)<br>II → V (5 %)<br>II → VI (25 %)<br>II → VII (9 %) | II → IV (5 %)<br>II → V (83 %)<br>II → VI (9 %) | I → III (78 %)<br>I → IV (2 %)<br>I → V (4 %)<br>I → VI (16 %) | I → IV (97 %)<br>I → VI (3 %)                |
| transition(s) energy                  | 398.3 nm<br>(25108.6 cm <sup>-1</sup> )                             | 382.4 nm<br>(26150.6 cm <sup>-1</sup> )         | 374.5 nm<br>(26705.8 cm <sup>-1</sup> )                        | 365.4 nm<br>(27370.3 cm <sup>-1</sup> )      |
| oscillator strength                   | <i>f</i> = 0.0015                                                   | <i>f</i> = 0.0006                               | <i>f</i> = 0.0016                                              | <i>f</i> = 0.0015                            |
| DFT lowest energy triplet emissions   |                                                                     |                                                 |                                                                |                                              |
| transition(s)<br>(% contribution)     | B ← C (85 %)<br>B ← E (3 %)<br>B ← F (12 %)                         | A ← F (4 %)<br>B ← D (93 %)<br>B ← E (3 %)      | A ← C (31 %)<br>A ← E (57 %)<br>A ← F (12 %)                   | A ← D (46 %)<br>A ← E (15 %)<br>A ← F (39 %) |
| transition(s) energy                  | 581.6 nm<br>(17194.2 cm <sup>-1</sup> )                             | 536.8 nm<br>(18630.3 cm <sup>-1</sup> )         | 446.6 nm<br>(22390.9 cm <sup>-1</sup> )                        | 429.0 nm<br>(23310.0 cm <sup>-1</sup> )      |

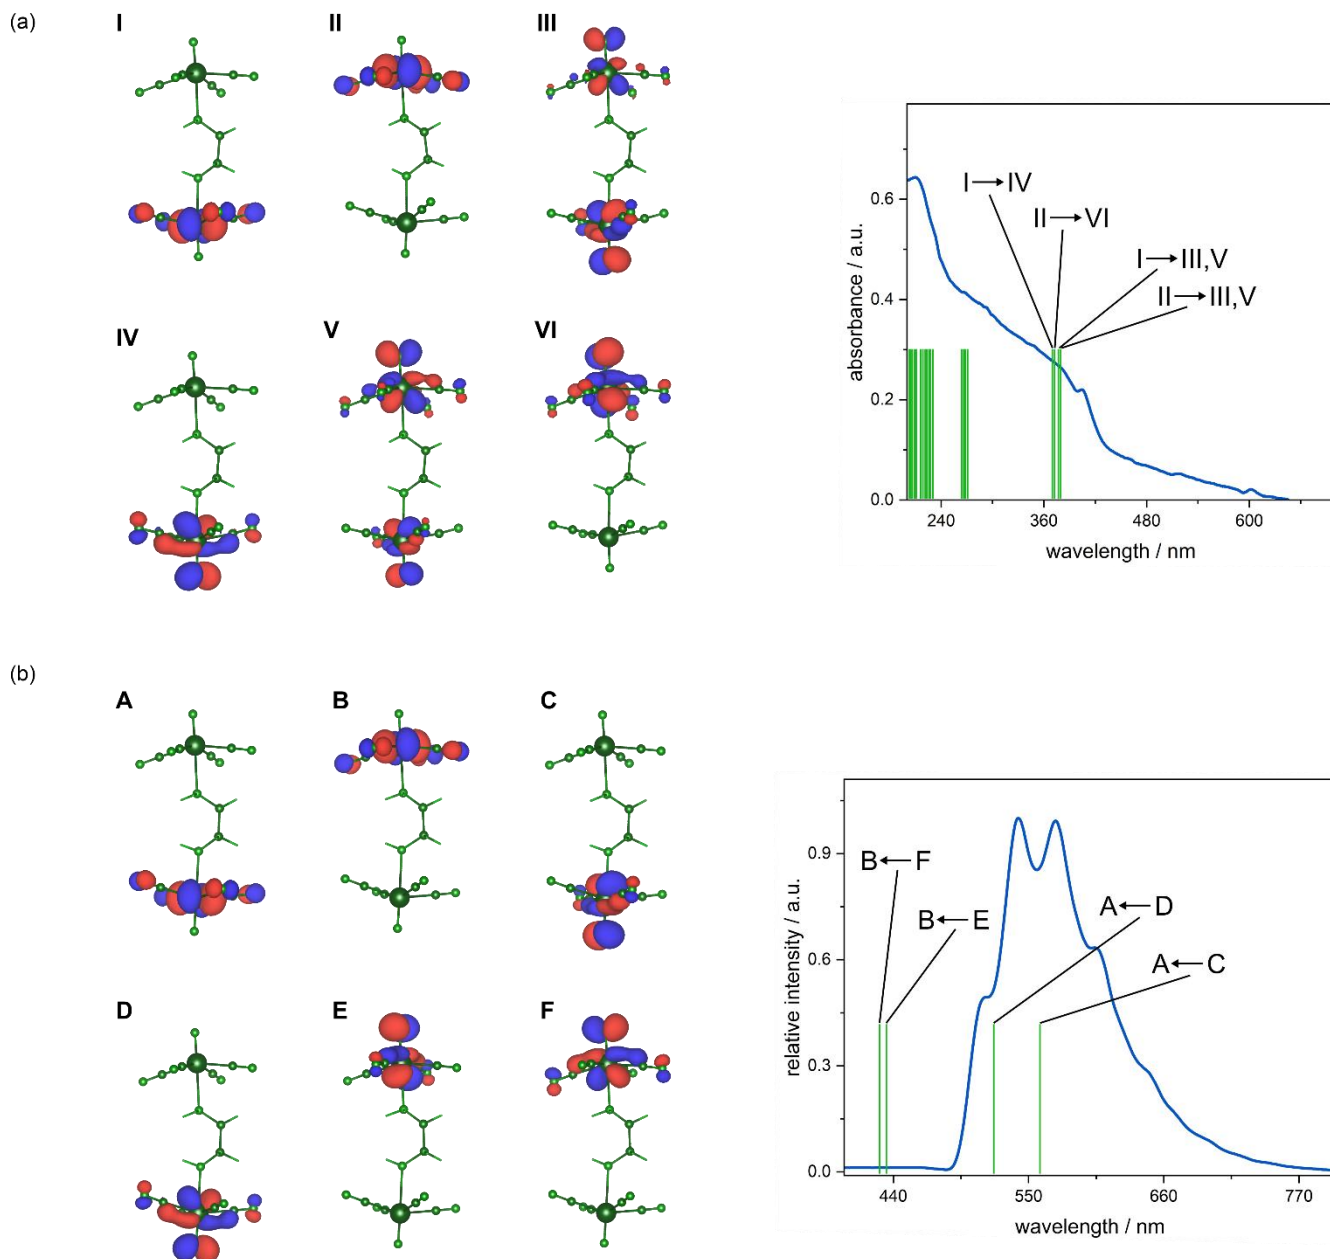

**Fig. S34** Contour plots of chosen MO corresponding to the TD-DFT singlet excitations (a) as well as for optimized excited triplet state geometry (b) in  $\text{Re}_2\text{-en}$ , together with the comparison of solid-state UV-vis absorption spectra with the excitation energies predicted for the lowest energy excited states and comparison of the low-temperature emission spectrum (30 K) with the emission energies predicted for the lowest energy excited states using the TD-DFT theoretical calculations (green lines). The contours of MO are presented with a 0.05 isovalue level. The transition(s) energies are presented in Table S46.

**Table S45** Selected optimized and experimental bond lengths and angles for complexes in **Re<sub>2</sub>-en** (see **Description of the molecular DFT/TD-DFT theoretical calculations** on Page S88 for details).

| structure      | parameters / Å, °     |                        |                       |                           |                           |
|----------------|-----------------------|------------------------|-----------------------|---------------------------|---------------------------|
|                | Re1/Re2≡N             | Re-C                   | Re1/Re2-N             | N≡Re-C (av.)              | N-Re1/Re2≡N               |
| SC-XRD (100 K) | 1.667(3)/<br>1.667(3) | 2.097(4) –<br>2.117(4) | 2.521(3)/<br>2.501(3) | 97.50(14) –<br>101.37(14) | 176.83(12)/<br>176.13(13) |
| ground state   | 1.667/1.667           | 2.09 – 2.13            | 2.521/2.501           | 89.11 – 100.44            | 176.83/176.13             |
| excited state  | 1.661/1.749           | 2.11 – 2.13            | 2.575/2.513           | 89.11 – 100.44            | 177.71/178.47             |

**Table S46** The excitation energies of the lowest energy excited states and emission energies predicted for the lowest energy excited states using the TD-DFT calculations in **Re<sub>2</sub>-en** (green lines in Fig. S34).

| <b>Re<sub>2</sub>-en</b>              |                                         |                                         |                                         |                                         |
|---------------------------------------|-----------------------------------------|-----------------------------------------|-----------------------------------------|-----------------------------------------|
| DFT lowest energy singlet excitations |                                         |                                         |                                         |                                         |
| transition(s)<br>(% contribution)     | II → III (64 %)<br>II → V (36 %)        | I → III (37 %)<br>I → V (63 %)          | II → VI (100 %)                         | I → IV (100 %)                          |
| transition(s) energy                  | 378.6 nm<br>(26415.2 cm <sup>-1</sup> ) | 377.1 nm<br>(26520.3 cm <sup>-1</sup> ) | 373.9 nm<br>(26744.4 cm <sup>-1</sup> ) | 372.6 nm<br>(26836.3 cm <sup>-1</sup> ) |
| oscillator strength                   | <i>f</i> = 0.0015                       | <i>f</i> = 0.0011                       | <i>f</i> = 0.0006                       | <i>f</i> = 0.0009                       |
| DFT lowest energy triplet emissions   |                                         |                                         |                                         |                                         |
| transition(s)<br>(% contribution)     | A ← C (100 %)                           | A ← D (100 %)                           | B ← E (100 %)                           | B ← F (100 %)                           |
| transition(s) energy                  | 559.0 nm<br>(17888.1 cm <sup>-1</sup> ) | 521.6 nm<br>(19173.6 cm <sup>-1</sup> ) | 429.1 nm<br>(23302.4 cm <sup>-1</sup> ) | 427.7 nm<br>(23381.4 cm <sup>-1</sup> ) |

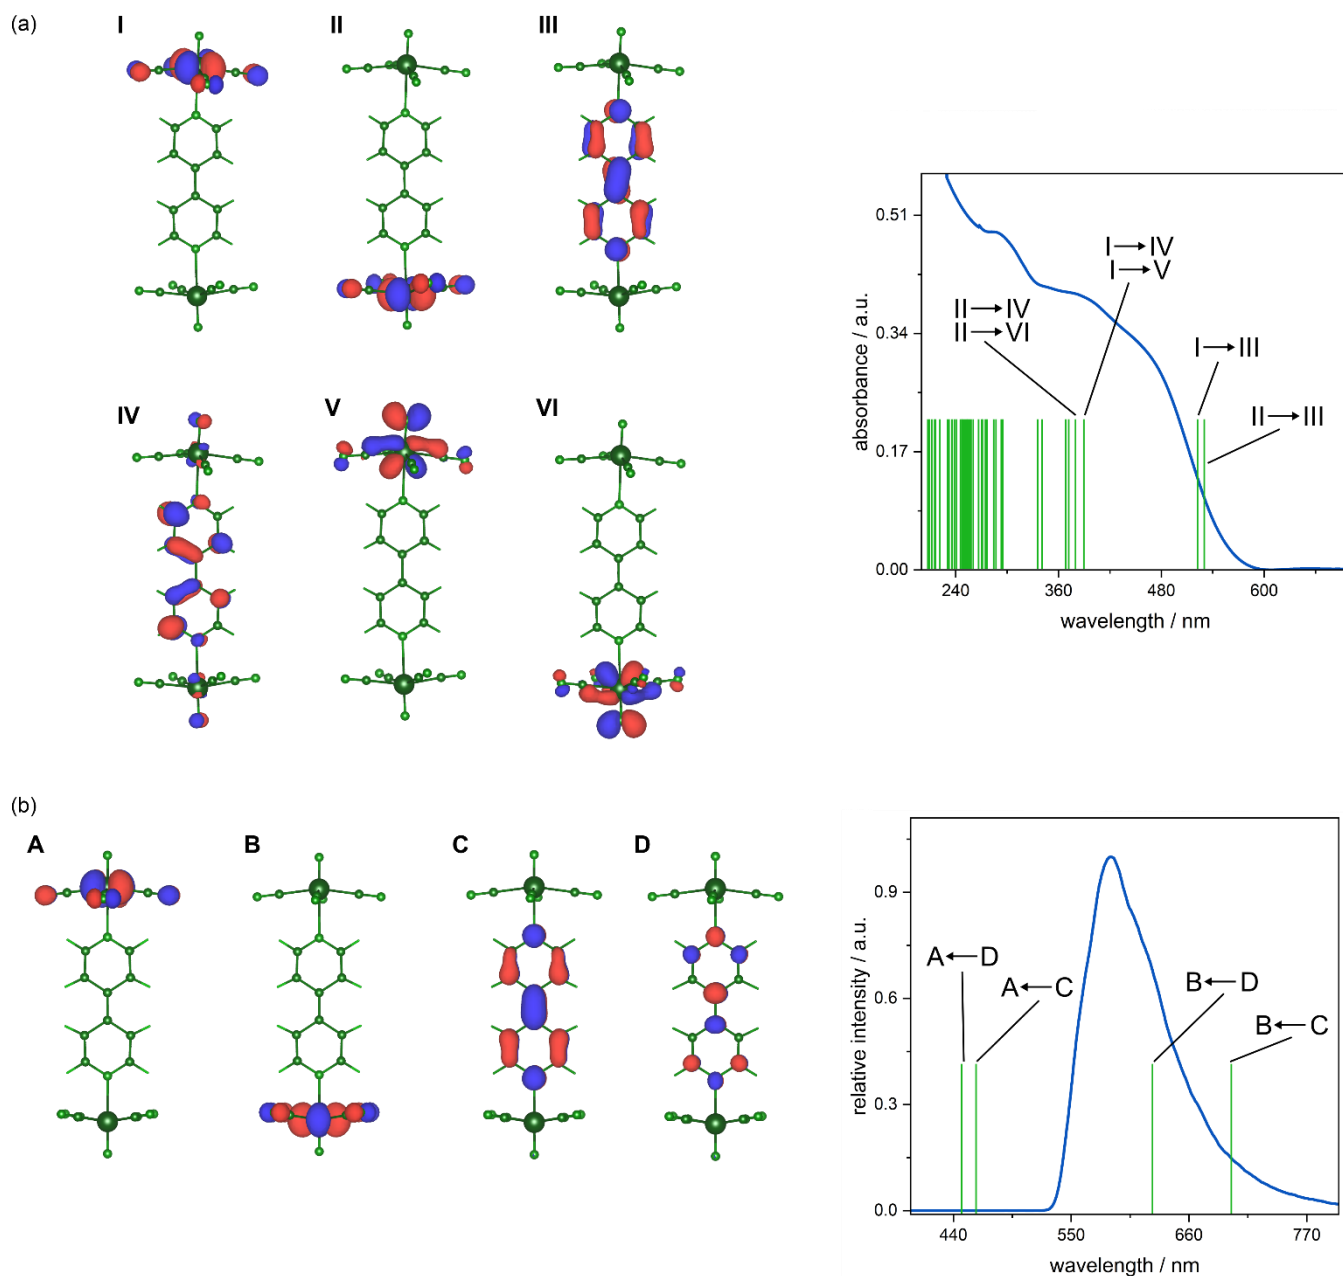

**Fig. S35** Contour plots of chosen MO corresponding to the TD-DFT singlet excitations (a) as well as for optimized excited triplet state geometry (b) in **Re<sub>2</sub>-bpy**, together with the comparison of solid-state UV-vis absorption spectra with the excitation energies predicted for the lowest energy excited states and comparison of the low-temperature emission spectrum (30 K) with the emission energies predicted for the lowest energy excited states using the TD-DFT theoretical calculations (green lines). The contours of MO are presented with a 0.05 isovalue level. The transition(s) energies are presented in Table S48.

**Table S47** Selected optimized and experimental bond lengths and angles for complexes in **Re<sub>2</sub>-bpy** (see **Description of the molecular DFT/TD-DFT theoretical calculations** on Page S88 for details).

| structure      | parameters / Å, ° |                     |             |                        |               |
|----------------|-------------------|---------------------|-------------|------------------------|---------------|
|                | Re≡N              | Re-C                | Re-N        | N≡Re-C (av.)           | N-Re≡N        |
| SC-XRD (100 K) | 1.659(2)          | 2.095(3) – 2.108(3) | 2.593(2)    | 98.90(12) – 100.05(12) | 176.90 (10)   |
| ground state   | 1.661/1.662       | 2.10 – 2.12         | 2.586/2.523 | 96.13 – 100.70         | 178.17/179.52 |
| excited state  | 1.660/1.666       | 2.11 – 2.12         | 2.581/2.367 | 96.73 – 99.72          | 179.93/179.99 |

**Table S48** The excitation energies of the lowest energy excited states and emission energies predicted for the lowest energy excited states using the TD-DFT calculations in **Re<sub>2</sub>-bpy** (green lines in Fig. S35).

| <b>Re<sub>2</sub>-bpy</b>             |                                         |                                         |                                         |                                         |
|---------------------------------------|-----------------------------------------|-----------------------------------------|-----------------------------------------|-----------------------------------------|
| DFT lowest energy singlet excitations |                                         |                                         |                                         |                                         |
| transition(s)<br>(% contribution)     | II → III (100 %)                        | I → III (100 %)                         | I → IV (97 %)<br>I → V (3 %)            | II → IV (96 %)<br>II → VI (4 %)         |
| transition(s) energy                  | 534.2 nm<br>(18718.5 cm <sup>-1</sup> ) | 524.6 nm<br>(19064.0 cm <sup>-1</sup> ) | 390.1 nm<br>(25635.8 cm <sup>-1</sup> ) | 380.4 nm<br>(26290.9 cm <sup>-1</sup> ) |
| oscillator strength                   | <i>f</i> = 0.0001                       | <i>f</i> = 0.0006                       | <i>f</i> = 0.0016                       | <i>f</i> = 0.0013                       |
| DFT lowest energy triplet emissions   |                                         |                                         |                                         |                                         |
| transition(s)<br>(% contribution)     | B ← C (100 %)                           | B ← D (100 %)                           | A ← C (100 %)                           | A ← D (100 %)                           |
| transition(s) energy                  | 698.4 nm<br>(14319.5 cm <sup>-1</sup> ) | 627.5 nm<br>(15937.5 cm <sup>-1</sup> ) | 455.8 nm<br>(23302.4 cm <sup>-1</sup> ) | 447.9 nm<br>(23381.4 cm <sup>-1</sup> ) |



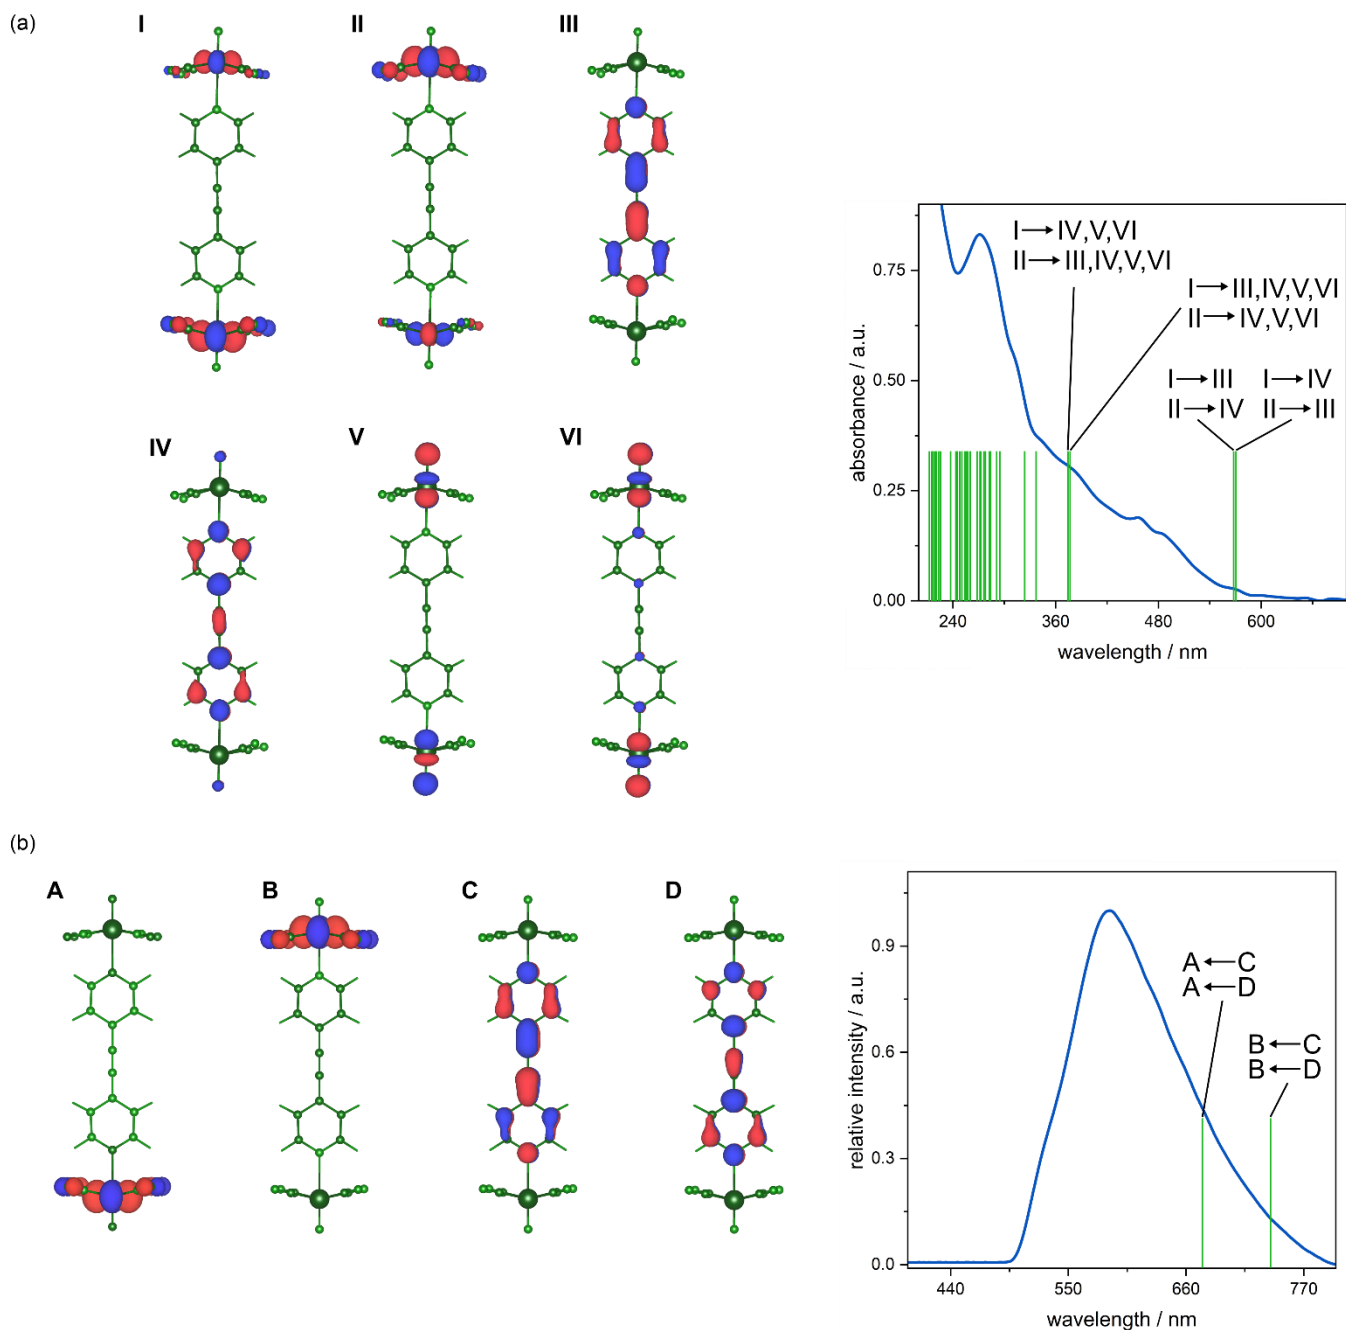

**Fig. S36** Contour plots of chosen MO corresponding to the TD-DFT singlet excitations (a) as well as for optimized excited triplet state geometry (b) in **Re<sub>2</sub>-bpac**, together with the comparison of solid-state UV-vis absorption spectra with the excitation energies predicted for the lowest energy excited states and comparison of the low-temperature emission spectrum (30 K) with the emission energies predicted for the lowest energy excited states using the TD-DFT theoretical calculations (green lines). The contours of MO are presented with a 0.05 isovalue level. The transition(s) energies are presented in Table S50.

**Table S49** Selected optimized and experimental bond lengths and angles for complexes in **Re<sub>2</sub>-bpac** (see **Description of the molecular DFT/TD-DFT theoretical calculations** on Page S88 for details).

| structure      | parameters / Å, ° |                     |             |                        |               |
|----------------|-------------------|---------------------|-------------|------------------------|---------------|
|                | Re≡N              | Re-C                | Re-N        | N≡Re-C (av.)           | N-Re≡N        |
| SC-XRD (100 K) | 1.659(3)          | 2.103(3) – 2.114(3) | 2.547(2)    | 99.02(12) – 101.01(12) | 177.99(11)    |
| ground state   | 1.660/1.660       | 2.10 – 2.11         | 2.547/2.547 | 99.10 – 100.90         | 178.07/178.07 |
| excited state  | 1.661/1.662       | 96.98 – 99.44       | 2.550/2.387 | 96.98 – 100.90         | 179.98/180.00 |

**Table S50** The excitation energies of the lowest energy excited states and emission energies predicted for the lowest energy excited states using the TD-DFT calculations in **Re<sub>2</sub>-bpac** (green lines in Fig. S36).

| <b>Re<sub>2</sub>-bpac</b>            |                                         |                                         |                                                                                                                    |                                                                                                                     |
|---------------------------------------|-----------------------------------------|-----------------------------------------|--------------------------------------------------------------------------------------------------------------------|---------------------------------------------------------------------------------------------------------------------|
| DFT lowest energy singlet excitations |                                         |                                         |                                                                                                                    |                                                                                                                     |
| transition(s)<br>(% contribution)     | I → IV (3 %)<br>II → III (97 %)         | I → III (97 %)<br>II → IV (3 %)         | I → III (3 %)<br>I → IV (23 %)<br>I → V (29 %)<br>I → VI (16 %)<br>II → IV (14 %)<br>II → V (7 %)<br>II → VI (9 %) | I → IV (14 %)<br>I → V (6 %)<br>I → VI (9 %)<br>II → III (3 %)<br>II → IV (23 %)<br>II → V (28 %)<br>II → VI (16 %) |
| transition(s) energy                  | 569.8 nm<br>(17550.3 cm <sup>-1</sup> ) | 569.8 nm<br>(17551.6 cm <sup>-1</sup> ) | 376.3 nm<br>(26571.7 cm <sup>-1</sup> )                                                                            | 376.3 nm<br>(26574.5 cm <sup>-1</sup> )                                                                             |
| oscillator strength                   | <i>f</i> = 0.0008                       | <i>f</i> = 0.0000                       | <i>f</i> = 0.0007                                                                                                  | <i>f</i> = 0.0011                                                                                                   |
| DFT lowest energy triplet emissions   |                                         |                                         |                                                                                                                    |                                                                                                                     |
| transition(s)<br>(% contribution)     | B ← C (97 %)<br>B ← D (3 %)             |                                         | A ← C (97 %)<br>A ← D (3 %)                                                                                        |                                                                                                                     |
| transition(s) energy                  | 743.8 nm<br>(13444.5 cm <sup>-1</sup> ) |                                         | 679.8 nm<br>(14710.6 cm <sup>-1</sup> )                                                                            |                                                                                                                     |

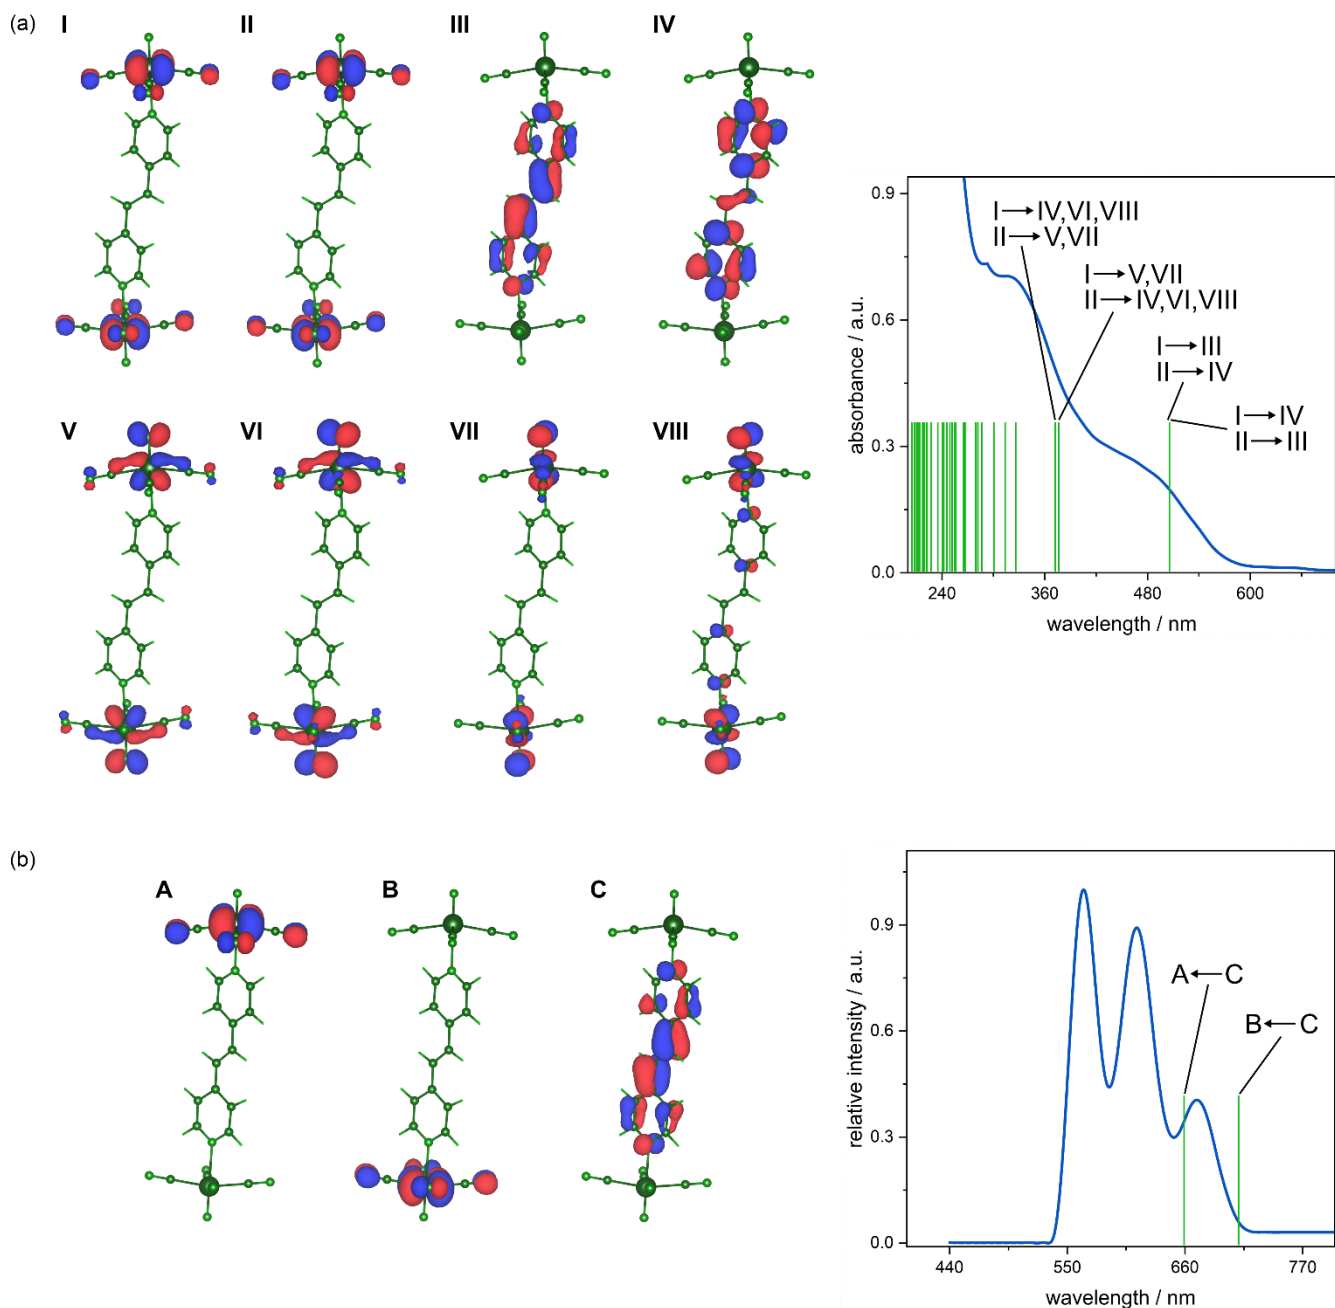

**Fig. S37** Contour plots of chosen MO corresponding to the TD-DFT singlet excitations (a) as well as for optimized excited triplet state geometry (b) in **Re<sub>2</sub>-bpee**, together with the comparison of solid-state UV-vis absorption spectra with the excitation energies predicted for the lowest energy excited states and comparison of the low-temperature emission spectrum (30 K) with the emission energies predicted for the lowest energy excited states using the TD-DFT theoretical calculations (green lines). The contours of MO are presented with a 0.05 isovalue level. The transition(s) energies are presented in Table S52.

**Table S51** Selected optimized and experimental bond lengths and angles for complexes in **Re<sub>2</sub>-bpee** (see **Description of the molecular DFT/TD-DFT theoretical calculations** on Page S88 for details).

| structure      | parameters / Å, ° |                     |             |                      |               |
|----------------|-------------------|---------------------|-------------|----------------------|---------------|
|                | Re≡N              | Re-C                | Re-N        | N≡Re-C (av.)         | N-Re≡N        |
| SC-XRD (100 K) | 1.660(4)          | 2.096(5) – 2.109(5) | 2.514(3)    | 98.3(2) – 100.67(19) | 178.88(18)    |
| ground state   | 1.660/1.660       | 2.09 – 2.11         | 2.514/2.514 | 98.32 – 100.67       | 178.89/178.90 |
| excited state  | 1.662/1.660       | 2.11 – 2.12         | 2.534/2.398 | 97.22 – 99.27        | 179.94/179.93 |

**Table S52** The excitation energies of the lowest energy excited states and emission energies predicted for the lowest energy excited states using the TD-DFT calculations in **Re<sub>2</sub>-bpee** (green lines in Fig. S37).

| <b>Re<sub>2</sub>-bpee</b>            |                                         |                                         |                                                                                      |                                                                                     |
|---------------------------------------|-----------------------------------------|-----------------------------------------|--------------------------------------------------------------------------------------|-------------------------------------------------------------------------------------|
| DFT lowest energy singlet excitations |                                         |                                         |                                                                                      |                                                                                     |
| transition(s)<br>(% contribution)     | I → IV (3 %)<br>II → III (97 %)         | I → III (97 %)<br>II → IV (3 %)         | I → V (41 %)<br>I → VII (3 %)<br>II → IV (19 %)<br>II → VI (27 %)<br>II → VIII (9 %) | I → IV (19 %)<br>I → VI (27 %)<br>I → VIII (9 %)<br>II → V (41 %)<br>II → VII (3 %) |
| transition(s) energy                  | 509.2 nm<br>(19637.1 cm <sup>-1</sup> ) | 509.2 nm<br>(19637.5 cm <sup>-1</sup> ) | 377.1 nm<br>(26519.6 cm <sup>-1</sup> )                                              | 375.1 nm<br>(26661.0 cm <sup>-1</sup> )                                             |
| oscillator strength                   | <i>f</i> = 0.0002                       | <i>f</i> = 0.0000                       | <i>f</i> = 0.0000                                                                    | <i>f</i> = 0.0025                                                                   |
| DFT lowest energy triplet emissions   |                                         |                                         |                                                                                      |                                                                                     |
| transition(s)<br>(% contribution)     | B ← C (100 %)                           |                                         | A ← C (100 %)                                                                        |                                                                                     |
| transition(s) energy                  | 707.9 nm<br>(14127.3 cm <sup>-1</sup> ) |                                         | 658.8 nm<br>(15178.2 cm <sup>-1</sup> )                                              |                                                                                     |

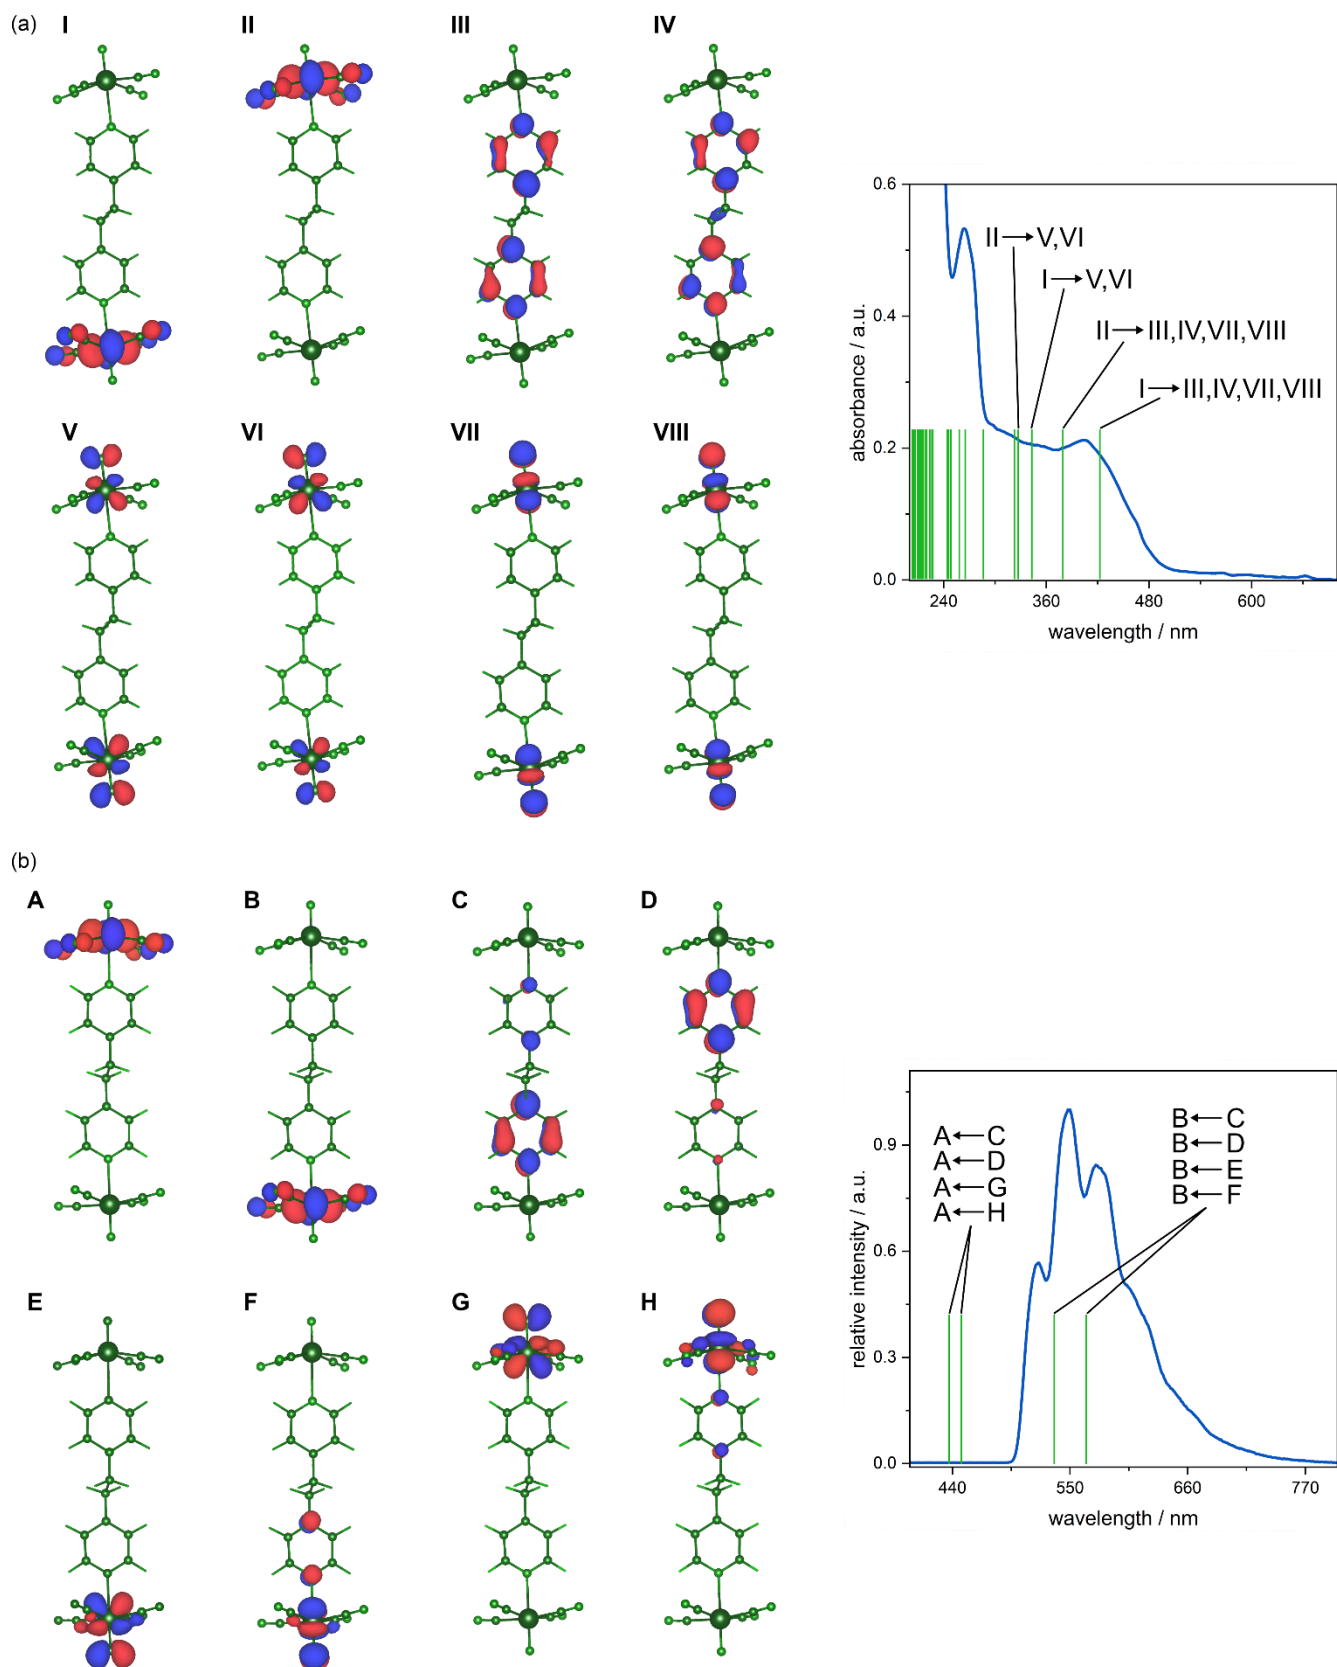

**Fig. S38** Contour plots of chosen MO corresponding to the TD-DFT singlet excitations (a) as well as for optimized excited triplet state geometry (b) in **Re<sub>2</sub>-bpen**, together with the comparison of solid-state UV-vis absorption spectra with the excitation energies predicted for the lowest energy excited states and comparison of the low-temperature emission spectrum (30 K) with the emission energies predicted for the lowest energy excited states using the TD-DFT theoretical calculations (green lines). The contours of MO are presented with a 0.05 isovalue level. The transition(s) energies are presented in Table S54.

**Table S53** Selected optimized and experimental bond lengths and angles for complexes in **Re<sub>2</sub>-bpen** (see **Description of the molecular DFT/TD-DFT theoretical calculations** on Page S88 for details).

| structure      | parameters / Å, ° |                        |             |                           |               |
|----------------|-------------------|------------------------|-------------|---------------------------|---------------|
|                | Re≡N              | Re-C                   | Re-N        | N≡Re-C (av.)              | N-Re≡N        |
| SC-XRD (100 K) | 1.665(2)          | 2.097(3) –<br>2.121(3) | 2.477(2)    | 95.97(11) –<br>100.50(12) | 179.09(10)    |
| ground state   | 1.663/1.664       | 2.10 – 2.12            | 2.488/2.478 | 96.09 – 100.48            | 179.20/179.20 |
| excited state  | 1.658/1.742       | 2.11 – 2.13            | 2.602/2.460 | 93.82 – 100.48            | 179.82/179.70 |

**Table S54** The excitation energies of the lowest energy excited states and emission energies predicted for the lowest energy excited states using the TD-DFT calculations in **Re<sub>2</sub>-bpen** (green lines in Fig. S38).

| <b>Re<sub>2</sub>-bpen</b>            |                                                                    |                                                                        |                                                              |                                                             |
|---------------------------------------|--------------------------------------------------------------------|------------------------------------------------------------------------|--------------------------------------------------------------|-------------------------------------------------------------|
| DFT lowest energy singlet excitations |                                                                    |                                                                        |                                                              |                                                             |
| transition(s)<br>(% contribution)     | I → III (52 %)<br>I → IV (32 %)<br>I → VII (8 %)<br>I → VIII (8 %) | II → III (53 %)<br>II → IV (32 %)<br>II → VII (8 %)<br>II → VIII (8 %) | I → V (61 %)<br>I → VI (39 %)                                | II → V (40 %)<br>II → VI (60 %)                             |
| transition(s) energy                  | 422.5 nm<br>(23669.8 cm <sup>-1</sup> )                            | 422.5 nm<br>(23670.3 cm <sup>-1</sup> )                                | 378.9 nm<br>(26392.2 cm <sup>-1</sup> )                      | 378.9 nm<br>(26393.6 cm <sup>-1</sup> )                     |
| oscillator strength                   | <i>f</i> = 0.0006                                                  | <i>f</i> = 0.0010                                                      | <i>f</i> = 0.0008                                            | <i>f</i> = 0.0013                                           |
| DFT lowest energy triplet emissions   |                                                                    |                                                                        |                                                              |                                                             |
| transition(s)<br>(% contribution)     | B ← C (32 %)<br>B ← D (13 %)<br>B ← E (35 %)<br>B ← F (20 %)       | B ← C (12 %)<br>B ← D (2 %)<br>B ← E (62 %)<br>B ← F (24 %)            | A ← C (18 %)<br>A ← D (26 %)<br>A ← G (30 %)<br>A ← H (26 %) | A ← C (3 %)<br>A ← D (11 %)<br>A ← G (58 %)<br>A ← H (28 %) |
| transition(s) energy                  | 564.5 nm<br>(17715.4 cm <sup>-1</sup> )                            | 534.3 nm<br>(18717.1 cm <sup>-1</sup> )                                | 444.2 nm<br>(22511.4 cm <sup>-1</sup> )                      | 431.7 nm<br>(23166.4 cm <sup>-1</sup> )                     |

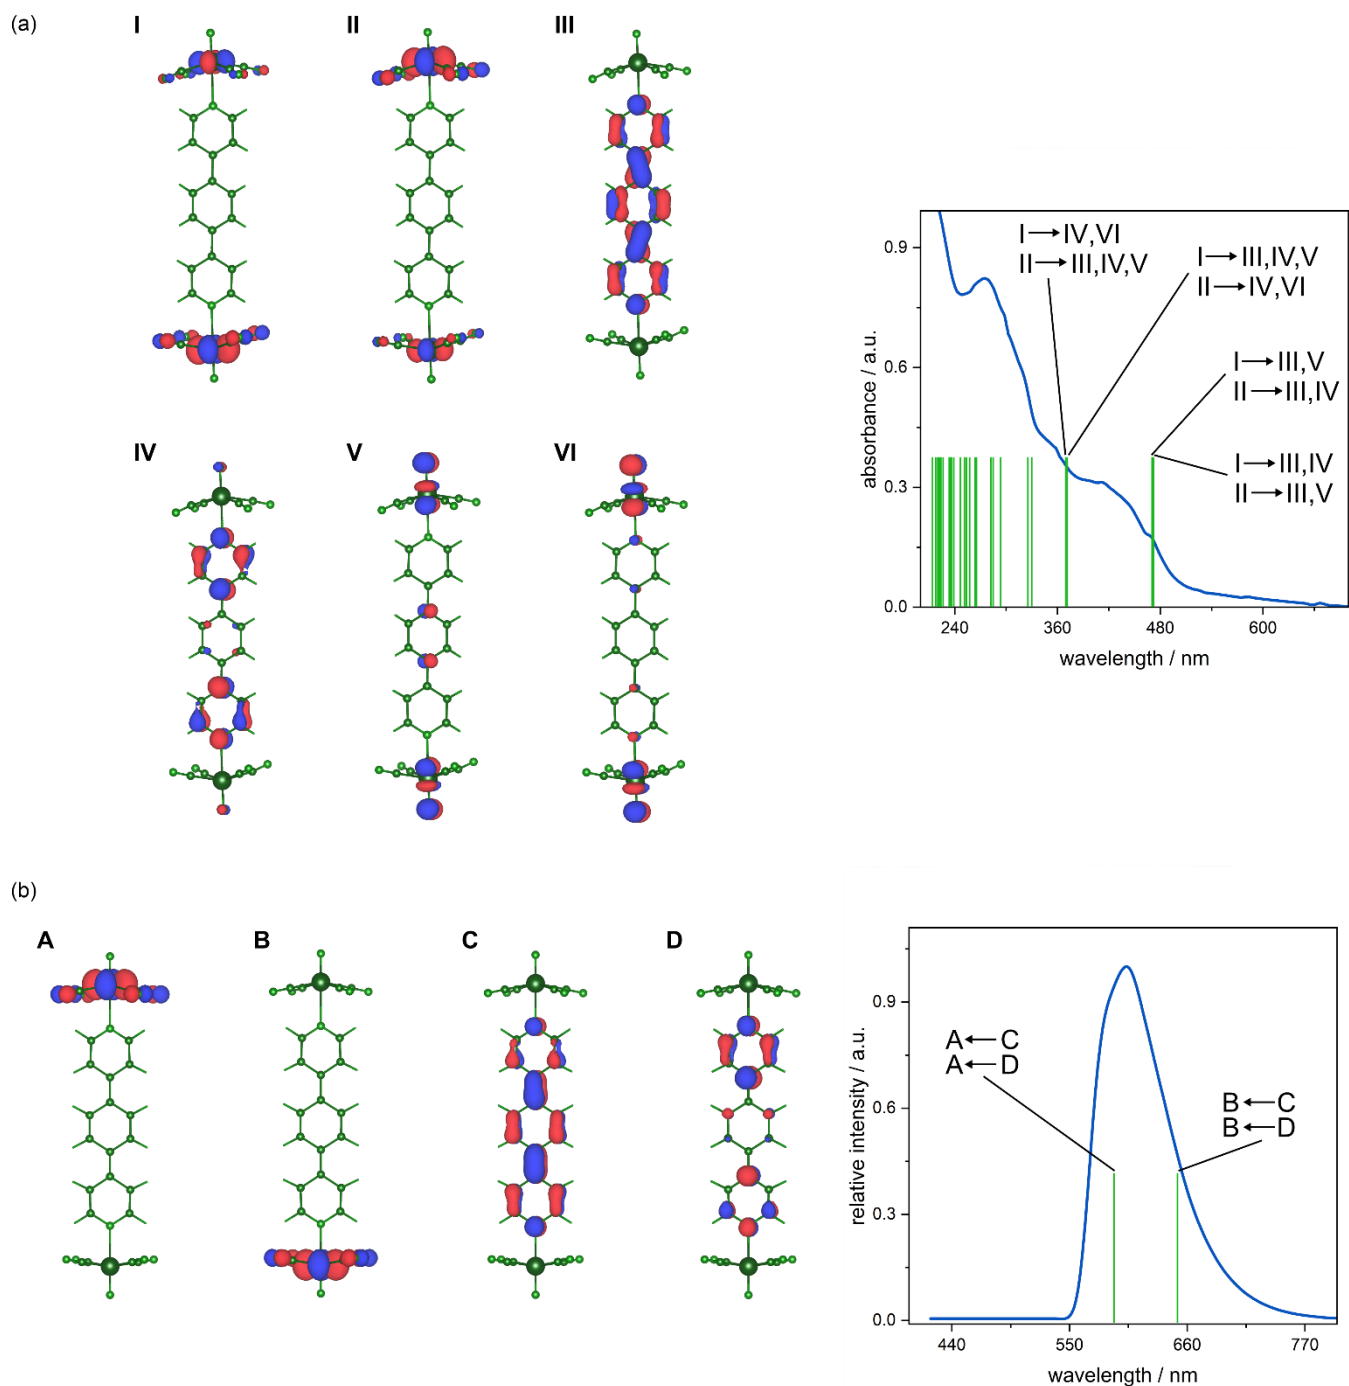

**Fig. S39** Contour plots of chosen MO corresponding to the TD-DFT singlet excitations (a) as well as for optimized excited triplet state geometry (b) in **Re<sub>2</sub>-bpb**, together with the comparison of solid-state UV-vis absorption spectra with the excitation energies predicted for the lowest energy excited states and comparison of the low-temperature emission spectrum (30 K) with the emission energies predicted for the lowest energy excited states using the TD-DFT theoretical calculations (green lines). The contours of MO are presented with a 0.05 isovalue level. The transition(s) energies are presented in Table S56.

**Table S55** Selected optimized and experimental bond lengths and angles for complexes in **Re<sub>2</sub>-bpb** (see **Description of the molecular DFT/TD-DFT theoretical calculations** on Page S88 for details).

| structure      | parameters / Å, ° |                     |             |                        |               |
|----------------|-------------------|---------------------|-------------|------------------------|---------------|
|                | Re≡N              | Re-C                | Re-N        | N≡Re-C (av.)           | N-Re≡N        |
| SC-XRD (100 K) | 1.656(3)          | 2.101(3) – 2.111(3) | 2.487(2)    | 99.86(12) – 101.69(12) | 177.57(11)    |
| ground state   | 1.656/1.656       | 2.10 – 2.11         | 2.487/2.487 | 99.86 – 101.68         | 177.57/177.56 |
| excited state  | 1.666/1.660       | 2.11 – 2.12         | 2.377/2.561 | 96.83 – 99.84          | 180.00/179.99 |

**Table S56** The excitation energies of the lowest energy excited states and emission energies predicted for the lowest energy excited states using the TD-DFT calculations in **Re<sub>2</sub>-bpb** (green lines in Fig. S39).

| <b>Re<sub>2</sub>-bpb</b>             |                                                                  |                                                                   |                                                                                    |                                                                                     |
|---------------------------------------|------------------------------------------------------------------|-------------------------------------------------------------------|------------------------------------------------------------------------------------|-------------------------------------------------------------------------------------|
| DFT lowest energy singlet excitations |                                                                  |                                                                   |                                                                                    |                                                                                     |
| transition(s)<br>(% contribution)     | I → III (8 %)<br>I → IV (12 %)<br>II → IV (78 %)<br>II → V (2 %) | I → III (2 %)<br>I → V (78 %)<br>II → III (8 %)<br>II → IV (12 %) | I → III (14 %)<br>I → IV (3 %)<br>I → V (27 %)<br>II → IV (38 %)<br>II → VI (18 %) | I → IV (38 %)<br>I → VI (18 %)<br>II → III (14 %)<br>II → IV (3 %)<br>II → V (27 %) |
| transition(s) energy                  | 471.9 nm<br>(21191.8 cm <sup>-1</sup> )                          | 471.9 nm<br>(21193.2 cm <sup>-1</sup> )                           | 371.1 nm<br>(26944.0 cm <sup>-1</sup> )                                            | 371.1 nm<br>(26944.7 cm <sup>-1</sup> )                                             |
| oscillator strength                   | <i>f</i> = 0.0013                                                | <i>f</i> = 0.0000                                                 | <i>f</i> = 0.0000                                                                  | <i>f</i> = 0.0013                                                                   |
| DFT lowest energy triplet emissions   |                                                                  |                                                                   |                                                                                    |                                                                                     |
| transition(s)<br>(% contribution)     | B ← C (95 %)<br>B ← D (5 %)                                      |                                                                   | A ← C (96 %)<br>A ← D (4 %)                                                        |                                                                                     |
| transition(s) energy                  | 652.8 nm<br>(15318.4 cm <sup>-1</sup> )                          |                                                                   | 590.8 nm<br>(16925.1 cm <sup>-1</sup> )                                            |                                                                                     |



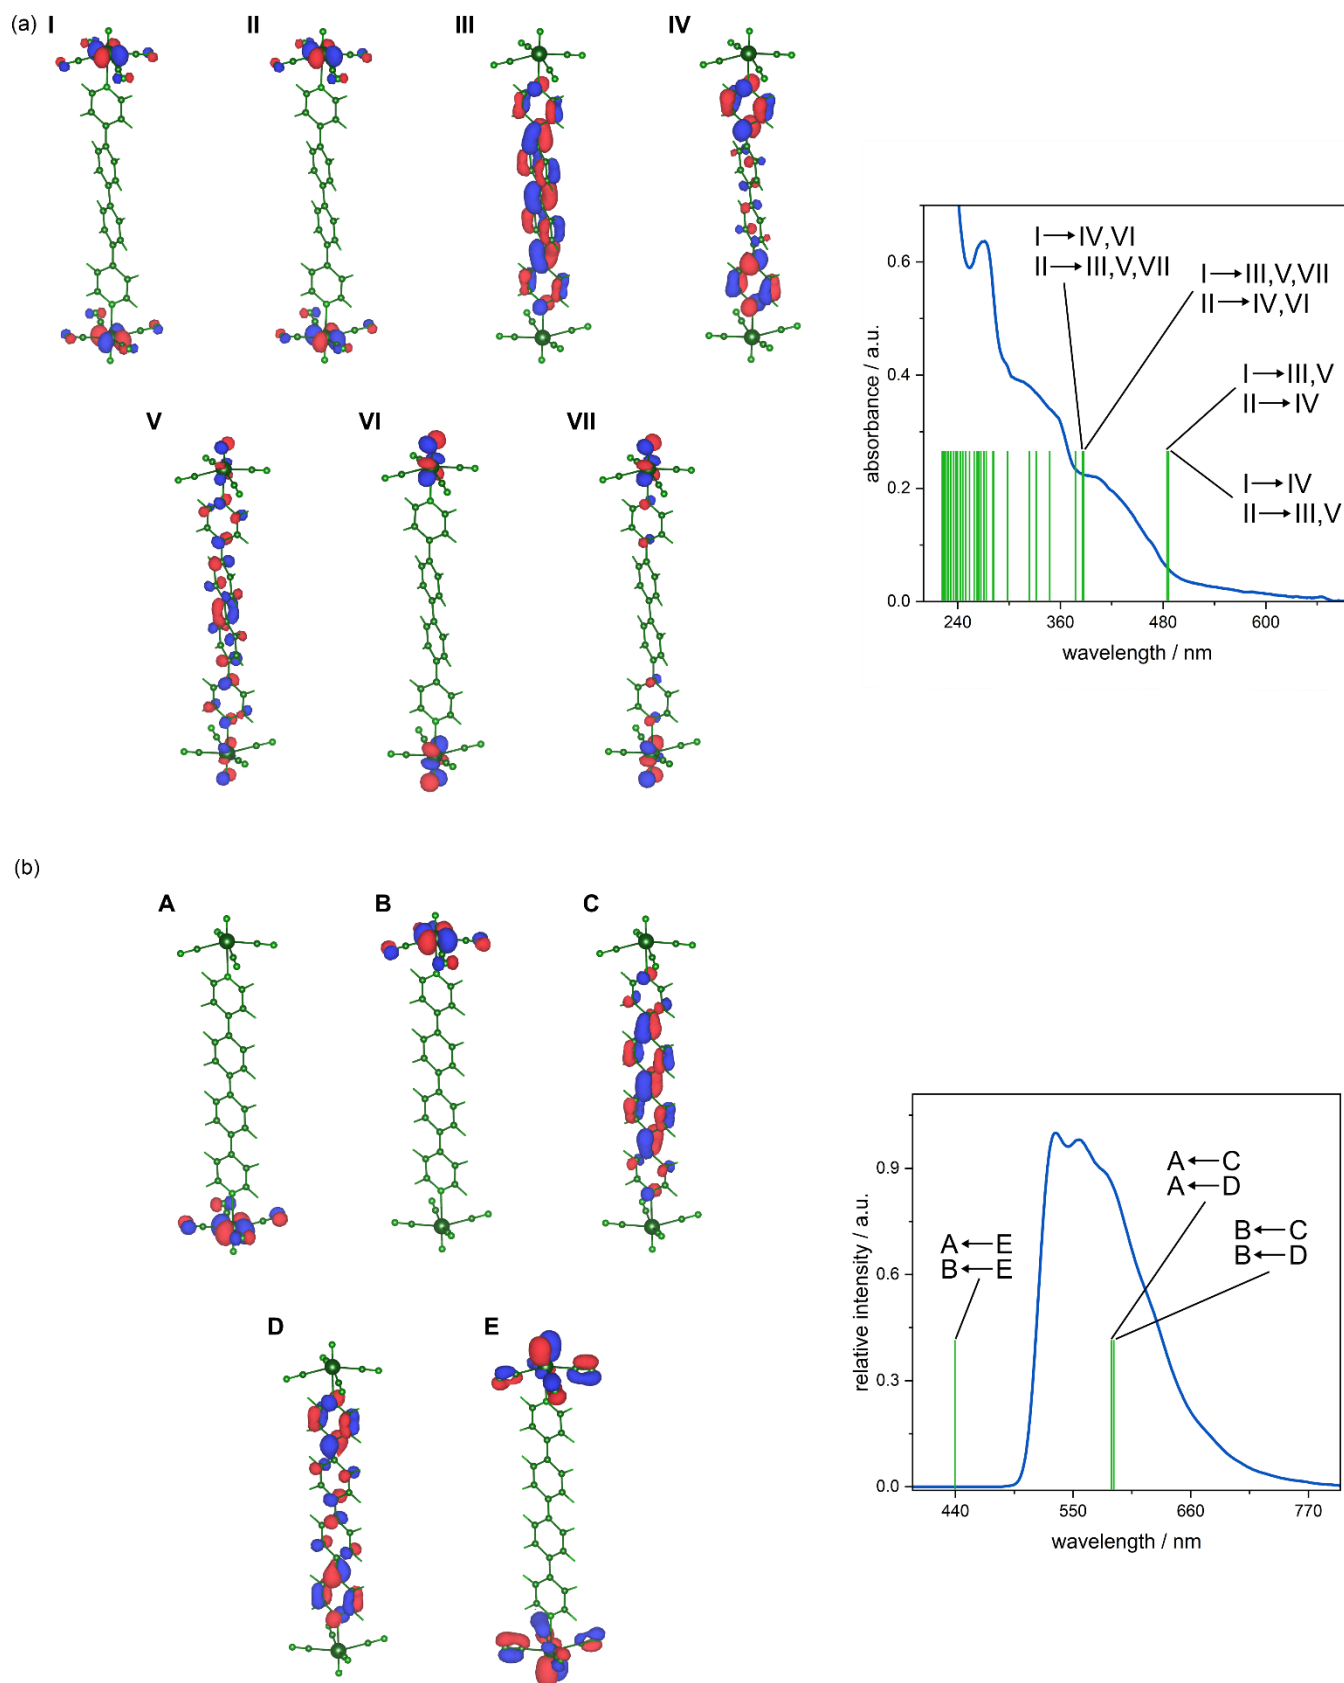

**Fig. S40** Contour plots of chosen MO corresponding to the TD-DFT singlet excitations (a) as well as for optimized excited triplet state geometry (b) in **Re<sub>2</sub>-bpbbp**, together with the comparison of solid-state UV-vis absorption spectra with the excitation energies predicted for the lowest energy excited states and comparison of the low-temperature emission spectrum (30 K) with the emission energies predicted for the lowest energy excited states using the TD-DFT theoretical calculations (green lines). The contours of MO are presented with a 0.05 isovalue level. The transition(s) energies are presented in Table S58.

**Table S57** Selected optimized and experimental bond lengths and angles for complexes in **Re<sub>2</sub>-bpbp** (see **Description of the molecular DFT/TD-DFT theoretical calculations** on Page S88 for details).

| structure      | parameters / Å, ° |                     |             |                       |               |
|----------------|-------------------|---------------------|-------------|-----------------------|---------------|
|                | Re≡N              | Re-C                | Re-N        | N≡Re-C (av.)          | N-Re≡N        |
| SC-XRD (100 K) | 1.662(4)          | 2.098(5) – 2.112(5) | 2.509(3)    | 98.27(18) – 99.36(18) | 179.10(16)    |
| ground state   | 1.661/1.661       | 2.09 – 2.11         | 2.512/2.512 | 98.27 – 99.41         | 179.18/179.17 |
| excited state  | 1.658/1.658       | 2.11 – 2.12         | 2.593/2.593 | 98.63 – 100.02        | 179.69/179.69 |

**Table S58** The excitation energies of the lowest energy excited states and emission energies predicted for the lowest energy excited states using the TD-DFT calculations in **Re<sub>2</sub>-bpbp** (green lines in Fig. S40).

| <b>Re<sub>2</sub>-bpbp</b>            |                                                  |                                                 |                                                                                     |                                                                                      |
|---------------------------------------|--------------------------------------------------|-------------------------------------------------|-------------------------------------------------------------------------------------|--------------------------------------------------------------------------------------|
| DFT lowest energy singlet excitations |                                                  |                                                 |                                                                                     |                                                                                      |
| transition(s)<br>(% contribution)     | I → IV (14 %)<br>II → III (83 %)<br>II → V (3 %) | I → III (83 %)<br>I → V (3 %)<br>II → IV (14 %) | I → III (18 %)<br>I → V (14 %)<br>I → VII (7 %)<br>II → IV (49 %)<br>II → VI (13 %) | I → IV (49 %)<br>I → VI (13 %)<br>II → III (18 %)<br>II → V (14 %)<br>II → VII (7 %) |
| transition(s) energy                  | 486.9 nm<br>(20539.4 cm <sup>-1</sup> )          | 486.9 nm<br>(20539.8 cm <sup>-1</sup> )         | 387.8 nm<br>(25784.5 cm <sup>-1</sup> )                                             | 387.8 nm<br>(25784.5 cm <sup>-1</sup> )                                              |
| oscillator strength                   | <i>f</i> = 0.0005                                | <i>f</i> = 0.0000                               | <i>f</i> = 0.0000                                                                   | <i>f</i> = 0.0010                                                                    |
| DFT lowest energy triplet emissions   |                                                  |                                                 |                                                                                     |                                                                                      |
| transition(s)<br>(% contribution)     | B ← C (96 %)<br>B ← D (4 %)                      | A ← C (96 %)<br>A ← D (4 %)                     | A ← E (48 %)<br>B ← E (52 %)                                                        | A ← E (51 %)<br>B ← E (49 %)                                                         |
| transition(s) energy                  | 587.3 nm<br>(17026.8 cm <sup>-1</sup> )          | 587.3 nm<br>(17028.2 cm <sup>-1</sup> )         | 439.5 nm<br>(22752.6 cm <sup>-1</sup> )                                             | 432.7 nm<br>(23110.7 cm <sup>-1</sup> )                                              |

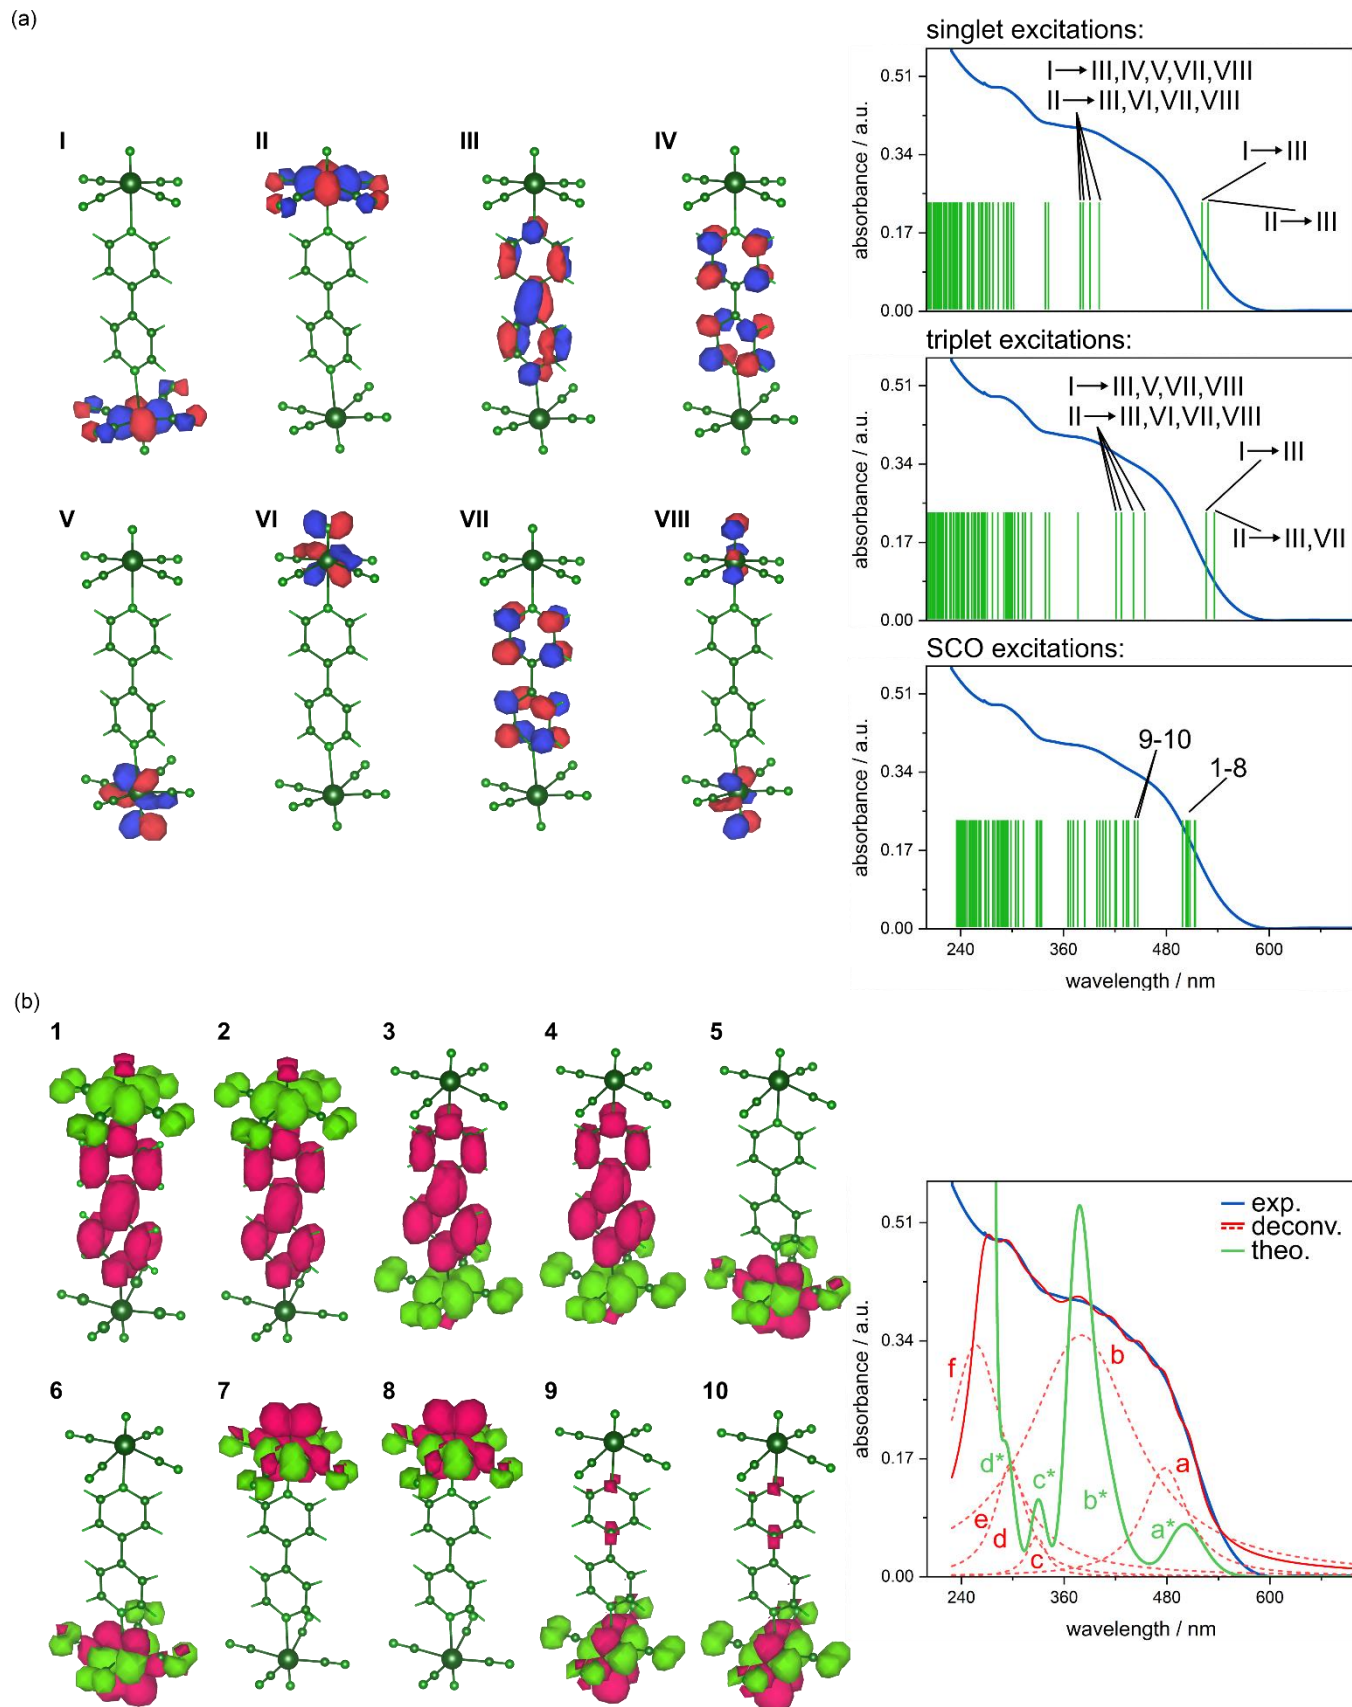

**Fig. S41** Contour plots (with the 0.05 isovalue level) of chosen MO corresponding to the TD-DFT singlet or triplet excitations (a) as well as differential contour plots (b) corresponding to changes in the orbital occupation during the transition between the ground and the respective excited spin-orbit coupled state (green - electron depletion, purple - electron gain) in **Re<sub>2</sub>-bpy**, together with the comparison of absorption spectra with the excitation energies predicted for the lowest energy excited states (a, right panel), and the comparison of the deconvoluted absorption spectra with the theoretically simulated spectrum (b, right panel). The transition(s) energies are presented in Table S59.

**Table S59** The predicted excitation energies of lowest energy singlet, triplet, and spin-orbit corrected excited states using the TD-DFT calculations in **Re<sub>2</sub>-bpy** (see Fig. S41) compared with deconvoluted experimental absorption spectra.

| DFT lowest energy singlet excitations                                                          |                                       |                                       |                                       |                                       |                                       |                                       |
|------------------------------------------------------------------------------------------------|---------------------------------------|---------------------------------------|---------------------------------------|---------------------------------------|---------------------------------------|---------------------------------------|
| transition(s)                                                                                  | II → III                              | I → III                               | I → IV,V,VII                          | II → VI,VII                           | I → III, VIII                         | II → III, VIII                        |
| transition(s)<br>energy                                                                        | 528.8 nm<br>(18911 cm <sup>-1</sup> ) | 520.9 nm<br>(19198 cm <sup>-1</sup> ) | 400.8 nm<br>(24950 cm <sup>-1</sup> ) | 390.5 nm<br>(25608 cm <sup>-1</sup> ) | 382.8 nm<br>(26123 cm <sup>-1</sup> ) | 379.2 nm<br>(26371 cm <sup>-1</sup> ) |
| oscillator<br>strength                                                                         | <i>f</i> = 0.0002                     | <i>f</i> = 0.0006                     | <i>f</i> = 0.0024                     | <i>f</i> = 0.0024                     | <i>f</i> = 0.0010                     | <i>f</i> = 0.0012                     |
| DFT lowest energy triplet excitations                                                          |                                       |                                       |                                       |                                       |                                       |                                       |
| transition(s)                                                                                  | II → III, VII                         | I → III<br>II → VII                   | I → V, VII                            | II → VI, VII                          | I → III, VIII                         | II → III, VIII                        |
| transition(s)<br>energy                                                                        | 536.2 nm<br>(18650 cm <sup>-1</sup> ) | 526.9 nm<br>(18979 cm <sup>-1</sup> ) | 454.4 nm<br>(22007 cm <sup>-1</sup> ) | 440.9 nm<br>(22681 cm <sup>-1</sup> ) | 427.2 nm<br>(23408 cm <sup>-1</sup> ) | 421.2 nm<br>(23742 cm <sup>-1</sup> ) |
| DFT lowest energy spin-orbit corrected excitations                                             |                                       |                                       |                                       |                                       |                                       |                                       |
| state no.                                                                                      | 1                                     | 2                                     | 3                                     | 4                                     | 5                                     |                                       |
| state<br>energy                                                                                | 514.1 nm<br>(19451 cm <sup>-1</sup> ) | 514.0 nm<br>(19455 cm <sup>-1</sup> ) | 513.6 nm<br>(19470 cm <sup>-1</sup> ) | 506.6 nm<br>(19739 cm <sup>-1</sup> ) | 505.6 nm<br>(19778 cm <sup>-1</sup> ) |                                       |
| oscillator<br>strength                                                                         | <i>f</i> = 0.0000                     | <i>f</i> = 0.0000                     | <i>f</i> = 0.0000                     | <i>f</i> = 0.0002                     | <i>f</i> = 0.0000                     |                                       |
| composition                                                                                    | 100 % triplet                         | 100 % triplet                         | 100 % triplet                         | 100 % singlet                         | 100 % triplet                         |                                       |
| state no.                                                                                      | 6                                     | 7                                     | 8                                     | 9                                     | 10                                    |                                       |
| state<br>energy                                                                                | 505.5 nm<br>(19782 cm <sup>-1</sup> ) | 505.3 nm<br>(19790 cm <sup>-1</sup> ) | 499.3 nm<br>(20028 cm <sup>-1</sup> ) | 446.3 nm<br>(22406 cm <sup>-1</sup> ) | 446.2 nm<br>(22411 cm <sup>-1</sup> ) |                                       |
| oscillator<br>strength                                                                         | <i>f</i> = 0.0000                     | <i>f</i> = 0.0000                     | <i>f</i> = 0.0006                     | <i>f</i> = 0.0000                     | <i>f</i> = 0.0001                     |                                       |
| composition                                                                                    | 100 % triplet                         | 100 % triplet                         | 100 % singlet                         | 100 % triplet                         | 100 % triplet                         |                                       |
| comparison of deconvoluted experimental absorption spectra with DFT-predicted absorption bands |                                       |                                       |                                       |                                       |                                       |                                       |
| transition                                                                                     | a                                     | b                                     | c                                     | d                                     | e                                     | f                                     |
| experimental<br>absorption spectra                                                             | 478 nm<br>(20921 cm <sup>-1</sup> )   | 380 nm<br>(26316 cm <sup>-1</sup> )   | 326 nm<br>(30675 cm <sup>-1</sup> )   | 298 nm<br>(33557 cm <sup>-1</sup> )   | 286 nm<br>(34965 cm <sup>-1</sup> )   | 260 nm<br>(38462 cm <sup>-1</sup> )   |
| transition                                                                                     | a*                                    | b*                                    | c*                                    | d*                                    | -                                     | -                                     |
| DFT predicted<br>absorption bands                                                              | 501 nm<br>(19960 cm <sup>-1</sup> )   | 378 nm<br>(26455 cm <sup>-1</sup> )   | 329 nm<br>(30395 cm <sup>-1</sup> )   | 291 nm<br>(34364 cm <sup>-1</sup> )   | -                                     | -                                     |

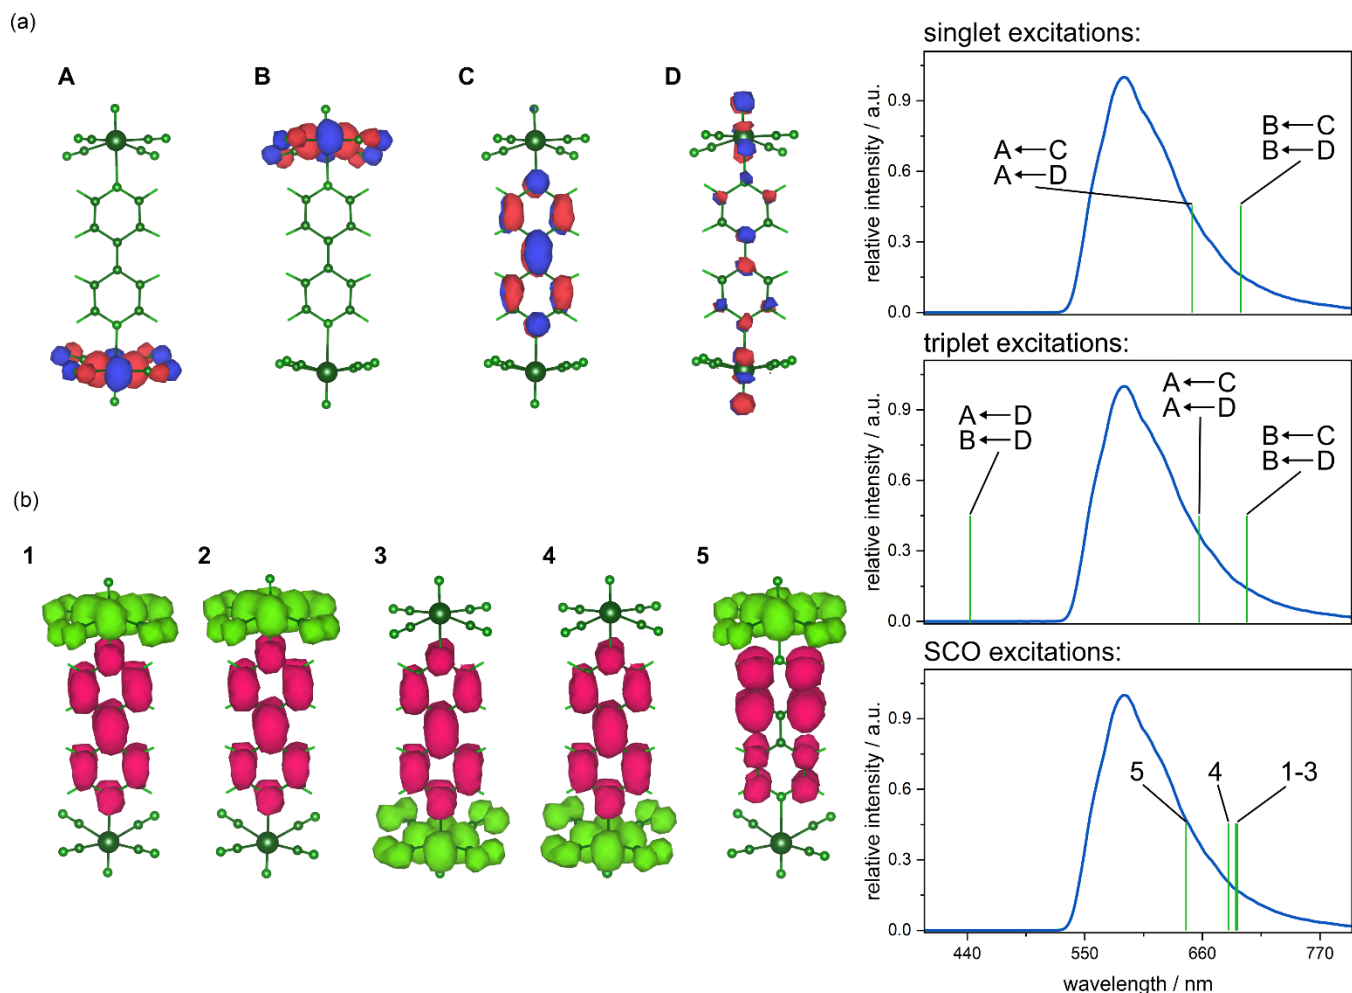

**Fig. S42** Contour plots (with the 0.05 isovalue level) of chosen MO corresponding to the TD-DFT singlet or triplet emissions (a) as well as differential contour plots (b) corresponding to changes in the orbital occupation during the transition between the respective excited spin-orbit coupled state and ground state (green - electron depletion, purple - electron gain) in **Re<sub>2</sub>-bpy**, together with the comparison of the low-temperature emission spectrum (30 K) with the emission energies predicted for the lowest energy excited states using the TD-DFT theoretical calculations (green lines, right panel). The transition(s) energies are presented in Table S60.

**Table S60** The predicted emission energies predicted for the lowest energy excited states using the TD-DFT calculations in **Re<sub>2</sub>-bpy** (green lines in Fig. S42).

| DFT lowest energy singlet emissions              |                                       |                                       |                                       |                                       |                                       |
|--------------------------------------------------|---------------------------------------|---------------------------------------|---------------------------------------|---------------------------------------|---------------------------------------|
| transition(s)                                    | B ← C<br>B ← D                        | A ← C<br>A ← D                        | -                                     | -                                     | -                                     |
| transition(s)<br>energy                          | 698.8 nm<br>(14310 cm <sup>-1</sup> ) | 653.4 nm<br>(15305 cm <sup>-1</sup> ) | -                                     | -                                     | -                                     |
| oscillator<br>strength                           | <i>f</i> = 0.0003                     | <i>f</i> = 0.0002                     | -                                     | -                                     | -                                     |
| DFT lowest energy triplet emissions              |                                       |                                       |                                       |                                       |                                       |
| transition(s)                                    | B ← C<br>B ← D                        | A ← C<br>A ← D                        | A ← D<br>B ← D                        | -                                     | -                                     |
| transition(s)<br>energy                          | 705.9 nm<br>(14166 cm <sup>-1</sup> ) | 657.4 nm<br>(15211 cm <sup>-1</sup> ) | 441.3 nm<br>(22660 cm <sup>-1</sup> ) | -                                     | -                                     |
| DFT lowest energy spin-orbit corrected emissions |                                       |                                       |                                       |                                       |                                       |
| state no.                                        | 1                                     | 2                                     | 3                                     | 4                                     | 5                                     |
| state<br>energy                                  | 691.9 nm<br>(14453 cm <sup>-1</sup> ) | 691.8 nm<br>(14455 cm <sup>-1</sup> ) | 691.7 nm<br>(14457 cm <sup>-1</sup> ) | 684.9 nm<br>(14601 cm <sup>-1</sup> ) | 645.1 nm<br>(15501 cm <sup>-1</sup> ) |
| oscillator<br>strength                           | <i>f</i> = 0.0000                     | <i>f</i> = 0.0000                     | <i>f</i> = 0.0001                     | <i>f</i> = 0.0003                     | <i>f</i> = 0.0000                     |
| composition                                      | 100 % triplet                         | 100 % triplet                         | 100 % triplet                         | 100 % singlet                         | 100 % triplet                         |

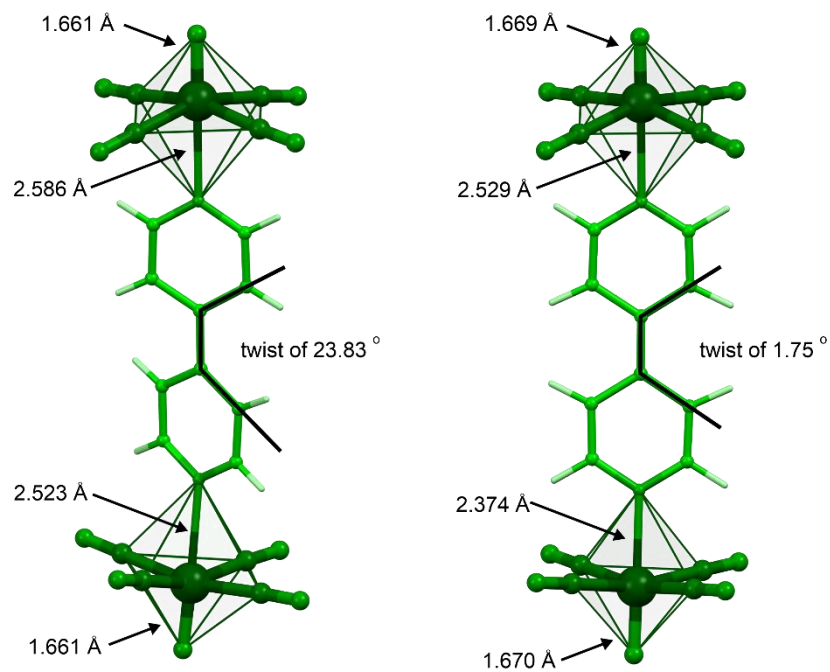

**Fig. S43** Comparison of selected bond lengths and angles of initial (experimental SC-XRD, left) and final (DFT optimized excited state, right) structure of dinuclear molecular anions in **Re<sub>2</sub>-bpy**.

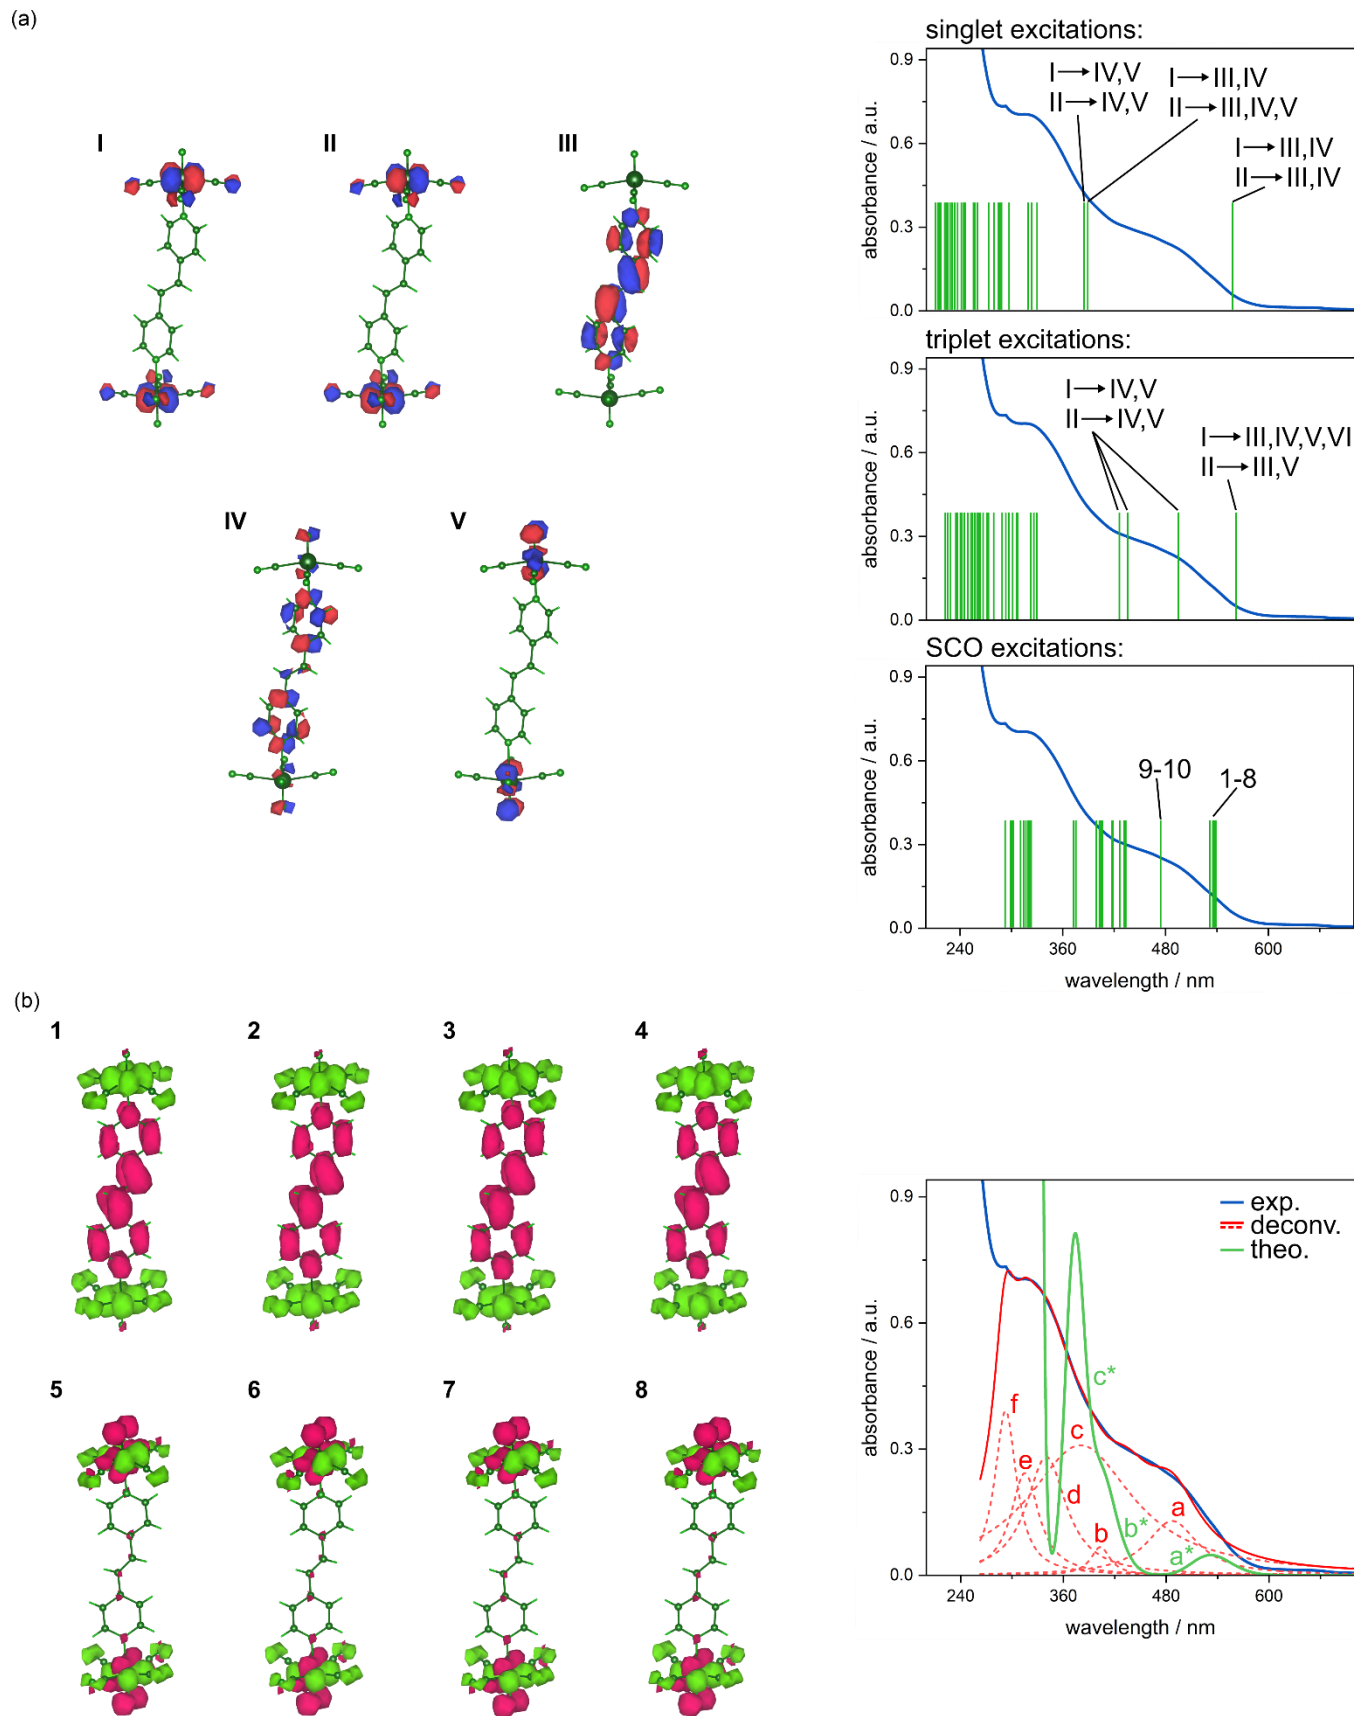

**Fig. S44** Contour plots (with the 0.05 isovalue level) of chosen MO corresponding to the TD-DFT singlet or triplet excitations (a) as well as differential contour plots (b) corresponding to changes in the orbital occupation during the transition between the ground and the respective excited spin-orbit coupled state (green - electron depletion, purple - electron gain) in **Re<sub>2</sub>-bpee**, together with the comparison of absorption spectra with the excitation energies predicted for the lowest energy excited states (a, right panel), and comparison of the deconvoluted absorption spectra with the theoretically simulated spectrum (b, right panel). The transition(s) energies are presented in Table S61.



**Table S61** The predicted excitation energies of lowest energy singlet, triplet, and spin-orbit corrected excited states using the TD-DFT calculations in **Re<sub>2</sub>-bpee** (see Fig. S44) compared with deconvoluted experimental absorption spectra.

| DFT lowest energy singlet excitations                                                          |                                       |                                       |                                       |                                       |                                       |                                       |
|------------------------------------------------------------------------------------------------|---------------------------------------|---------------------------------------|---------------------------------------|---------------------------------------|---------------------------------------|---------------------------------------|
| transition(s)                                                                                  | I → IV<br>II → III                    | I → III<br>II → IV                    | I → IV<br>II → III, V                 | I → III<br>II → IV                    | I → IV<br>II → V                      | I → V<br>II → IV                      |
| transition(s)<br>energy                                                                        | 557.7 nm<br>(17931 cm <sup>-1</sup> ) | 557.7 nm<br>(17931 cm <sup>-1</sup> ) | 388.3 nm<br>(25753 cm <sup>-1</sup> ) | 388.3 nm<br>(25753 cm <sup>-1</sup> ) | 383.9 nm<br>(26048 cm <sup>-1</sup> ) | 383.9 nm<br>(26048 cm <sup>-1</sup> ) |
| oscillator<br>strength                                                                         | <i>f</i> = 0.0000                     | <i>f</i> = 0.0004                     | <i>f</i> = 0.0000                     | <i>f</i> = 0.0043                     | <i>f</i> = 0.0000                     | <i>f</i> = 0.0026                     |
| DFT lowest energy triplet excitations                                                          |                                       |                                       |                                       |                                       |                                       |                                       |
| transition(s)                                                                                  | I → III, V, IV                        | I → IV<br>II → III, V                 | I → V<br>II → V                       | I → V<br>II → IV                      | I → IV<br>II → V                      | I → IV, V<br>II → IV, V               |
| transition(s)<br>energy                                                                        | 562.4 nm<br>(17781 cm <sup>-1</sup> ) | 562.3 nm<br>(17784 cm <sup>-1</sup> ) | 494.6 nm<br>(20218 cm <sup>-1</sup> ) | 436.0 nm<br>(22936 cm <sup>-1</sup> ) | 436.0 nm<br>(22935 cm <sup>-1</sup> ) | 426.2 nm<br>(23463 cm <sup>-1</sup> ) |
| DFT lowest energy spin-orbit corrected excitations                                             |                                       |                                       |                                       |                                       |                                       |                                       |
| state no.                                                                                      | 1                                     | 2                                     | 3                                     | 4                                     | 5                                     |                                       |
| state<br>energy                                                                                | 536.5 nm<br>(18639 cm <sup>-1</sup> ) | 536.5 nm<br>(18639 cm <sup>-1</sup> ) | 536.3 nm<br>(18646 cm <sup>-1</sup> ) | 536.3 nm<br>(18646 cm <sup>-1</sup> ) | 536.2 nm<br>(18650 cm <sup>-1</sup> ) |                                       |
| oscillator<br>strength                                                                         | <i>f</i> = 0.0000                     |                                       |
| composition                                                                                    | 100 % triplet                         |                                       |
| state no.                                                                                      | 6                                     | 7                                     | 8                                     | 9                                     | 10                                    |                                       |
| state<br>energy                                                                                | 535.9 nm<br>(18660 cm <sup>-1</sup> ) | 531.6 nm<br>(18811 cm <sup>-1</sup> ) | 531.6 nm<br>(18811 cm <sup>-1</sup> ) | 473.4 nm<br>(21124 cm <sup>-1</sup> ) | 473.4 nm<br>(21124 cm <sup>-1</sup> ) |                                       |
| oscillator<br>strength                                                                         | <i>f</i> = 0.0000                     | <i>f</i> = 0.0004                     | <i>f</i> = 0.0000                     | <i>f</i> = 0.0000                     | <i>f</i> = 0.0000                     |                                       |
| composition                                                                                    | 100 % triplet                         | 100 % singlet                         | 100 % singlet                         | 100 % triplet                         | 100 % triplet                         |                                       |
| comparison of deconvoluted experimental absorption spectra with DFT-predicted absorption bands |                                       |                                       |                                       |                                       |                                       |                                       |
| transition                                                                                     | a                                     | b                                     | c                                     | d                                     | e                                     | f                                     |
| experimental<br>absorption spectra                                                             | 485 nm<br>(20619 cm <sup>-1</sup> )   | 406 nm<br>(24631 cm <sup>-1</sup> )   | 378 nm<br>(26455 cm <sup>-1</sup> )   | 339 nm<br>(29499 cm <sup>-1</sup> )   | 315 nm<br>(31746 cm <sup>-1</sup> )   | 291 nm<br>(34364 cm <sup>-1</sup> )   |
| transition                                                                                     | a*                                    | b*                                    | c*                                    | -                                     | -                                     | -                                     |
| DFT predicted<br>absorption bands                                                              | 526 nm<br>(19011 cm <sup>-1</sup> )   | 402 nm<br>(24876 cm <sup>-1</sup> )   | 374 nm<br>(26738 cm <sup>-1</sup> )   | -                                     | -                                     | -                                     |

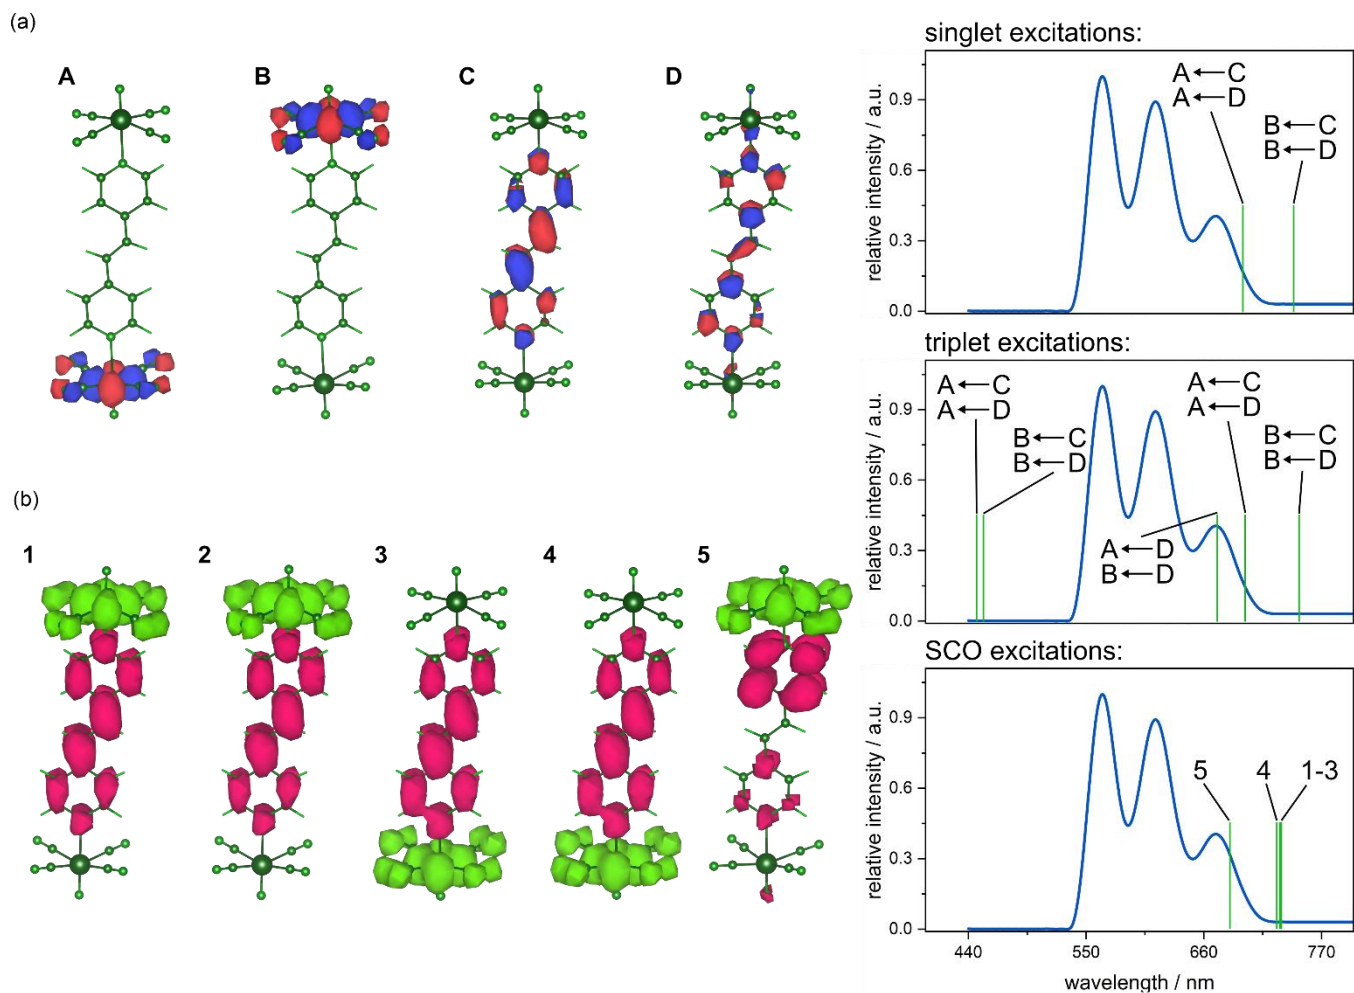

**Fig. S45** Contour plots (with the 0.05 isovalue level) of chosen MO corresponding to the TD-DFT singlet or triplet emissions (a) as well as differential contour plots (b) corresponding to changes in the orbital occupation during the transition between the respective excited spin-orbit coupled state and ground state (green - electron depletion, purple - electron gain) in **Re<sub>2</sub>-bpee**, together with the comparison of the low-temperature emission spectrum (30 K) with the emission energies predicted for the lowest energy excited states using the TD-DFT theoretical calculations (green lines, right panel). The transition(s) energies are presented in Table S62.

**Table S62** The predicted emission energies predicted for the lowest energy excited states using the TD-DFT calculations in **Re<sub>2</sub>-bpee** (green lines in Fig. S45).

| DFT lowest energy singlet emissions              |                                       |                                       |                                       |                                       |                                       |
|--------------------------------------------------|---------------------------------------|---------------------------------------|---------------------------------------|---------------------------------------|---------------------------------------|
| transition(s)                                    | B ← C<br>B ← D                        | A ← C<br>A ← D                        | -                                     | -                                     | -                                     |
| transition(s)<br>energy                          | 744.4 nm<br>(13434 cm <sup>-1</sup> ) | 696.3 nm<br>(14362 cm <sup>-1</sup> ) | -                                     | -                                     | -                                     |
| oscillator<br>strength                           | <i>f</i> = 0.0001                     | <i>f</i> = 0.0001                     | -                                     | -                                     | -                                     |
| DFT lowest energy triplet emissions              |                                       |                                       |                                       |                                       |                                       |
| transition(s)                                    | B ← C<br>B ← D                        | A ← C<br>A ← D                        | A ← D<br>B ← D                        | A ← C<br>A ← D                        | A ← C<br>A ← D                        |
| transition(s)<br>energy                          | 748.9 nm<br>(13353 cm <sup>-1</sup> ) | 698.8 nm<br>(14310 cm <sup>-1</sup> ) | 673.2 nm<br>(14854 cm <sup>-1</sup> ) | 446.8 nm<br>(22381 cm <sup>-1</sup> ) | 443.5 nm<br>(22548 cm <sup>-1</sup> ) |
| DFT lowest energy spin-orbit corrected emissions |                                       |                                       |                                       |                                       |                                       |
| state no.                                        | 1                                     | 2                                     | 3                                     | 4                                     | 5                                     |
| state<br>energy                                  | 733.6 nm<br>(13631 cm <sup>-1</sup> ) | 733.6 nm<br>(13631 cm <sup>-1</sup> ) | 733.5 nm<br>(13633 cm <sup>-1</sup> ) | 729.2 nm<br>(13714 cm <sup>-1</sup> ) | 685.4 nm<br>(14590 cm <sup>-1</sup> ) |
| oscillator<br>strength                           | <i>f</i> = 0.0000                     | <i>f</i> = 0.0000                     | <i>f</i> = 0.0001                     | <i>f</i> = 0.0001                     | <i>f</i> = 0.0001                     |
| composition                                      | 100 % triplet                         | 100 % triplet                         | 100 % triplet                         | 100 % singlet                         | 100 % triplet                         |

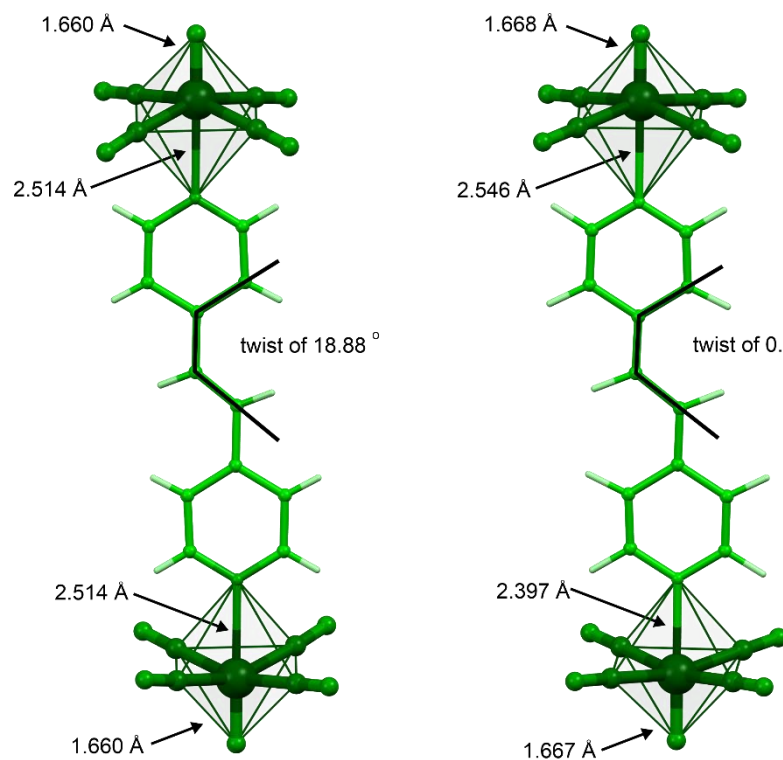

**Fig. S46** Comparison of selected bond lengths and angles of initial (experimental SC-XRD, left) and final (DFT optimized excited state, right) structure of dinuclear molecular anions in **Re<sub>2</sub>-bpee**.

## Description of the periodic DFT theoretical calculations

The crystal structures of the **Re<sub>2</sub>-bpac**, **Re<sub>2</sub>-bpb**, **Re<sub>2</sub>-bpbp**, and **Re<sub>2</sub>-bpen** materials were modeled at the DFT level of theory using periodic boundary conditions as implemented in the VASP program. These four systems create a meaningful set to analyze because two of them (**Re<sub>2</sub>-bpbp** and **Re<sub>2</sub>-bpen**) were assigned to the A group (see Fig. 4 and the main text) while **Re<sub>2</sub>-bpac** and **Re<sub>2</sub>-bpb** were assigned to the B group.

The calculations on periodic crystal structures were performed using density functional theory (DFT) methods within the Vienna Ab-Initio Simulation Package (VASP).<sup>527</sup> Given the importance of non-covalent interactions between molecules and the intent to use the periodic models to complement the results on molecular clusters, the experimentally determined lattice constants at room temperature were used and kept fixed during geometry optimizations. The PBE<sup>528</sup> exchange-correlation functional with a D3-generation post-SCF dispersion correction (PBE+D3; including Becke-Johnson dampening)<sup>511</sup> was used to optimize the first set of geometries. The hybrid HSE06 functional was used to compare with the PBE+D3 method and assess any potential problems that the expected electron delocalization error within PBE may have on the Re(V) metal-organic complexes.<sup>529</sup> The electronic structure plots shown in the main text (Fig. 6) used the DFT+U method to separate the energy levels of one of the organic linker molecules from the other (see text for description).

The plane-wave basis set cutoff was set to 500 eV, and the Re(6s/5d), P(3s/3p), O/N/C (2s/2p), and H (1s) valence electrons were treated explicitly and used in conjunction with PAW potentials that were supplied with the standard VASP package - version 5.4.<sup>530</sup> The VESTA program was used to generate the electron density plots.<sup>531</sup> Benchmarking calculations showed that including only the Gamma k-point was sufficient to obtain converged band energies and interaction energies, and so the geometries were optimized with Gamma-point-only calculations and the total energies and interaction energies were computed with an automatically generated k-point grid wherein the length parameter (Rk, as implemented in the VASP program) is set to 20 Å. The set of supporting results from these calculations together with the detailed comments is gathered in Fig. S47 and Tables S63–S65 (see below).

**Table S63** Computed bond distances (Å) in optimized geometries of selected dinuclear {Re<sup>V</sup><sub>2</sub>}<sup>4-</sup> molecular anions of **Re<sub>2</sub>-bpac**, **Re<sub>2</sub>-bpb**, and **Re<sub>2</sub>-bpen** materials (see Fig. 1, S9, S13, and S15 for comparison) at two levels of DFT theory using periodic boundary conditions: PBE+D3 and HSE06. The room-temperature experimental values (Exp.) are provided for comparison.

| Functional | Re <sub>2</sub> -bpac |        | Re <sub>2</sub> -bpen |        | Re <sub>2</sub> -bpb |        |
|------------|-----------------------|--------|-----------------------|--------|----------------------|--------|
|            | Re1-N6                | Re1-N6 | Re1-N6                | Re1≡N1 | Re1≡N1               | Re1≡N1 |
| PBE+D3     | 2.586                 | 2.535  | 2.529                 | 1.690  | 1.693                | 1.690  |
| HSE06      | 2.566                 | 2.508  | 2.507                 | 1.668  | 1.668                | 1.662  |
| Exp.       | 2.571                 | 2.512  | 2.497                 | 1.641  | 1.654                | 1.641  |

**Comment to Table S63:** Table S63 shows the computed Re≡N and Re-L distances from the optimized geometries with two types of DFT functionals (PBE+D3 and HSE06). Note that the simulation cell was kept fixed at the 298K parameters that were deduced from the experiment and the solvent molecules were removed from the simulation cell in this set of calculations. Both functionals agree well qualitatively with the crystal data in the sense that the Re-L distances are longest in **Re<sub>2</sub>-bpac** by >0.05 Å. It is also seen that the experimental values of Re-L and Re≡N are better reproduced by the HSE06 method, which agrees with the expectation that the treatment electron correlation within the hybrid (HSE06) DFT methodology is better suited for the metal-to-ligand bonding.

**Table S64** Computed interaction energies ( $\Delta E_{\text{int}}$ ) for the **Re<sub>2</sub>-bpac**, **Re<sub>2</sub>-bpb**, and **Re<sub>2</sub>-bpen** materials. The  $\Delta E_{\text{int}}$  was calculated from the difference between the total energy of the crystal structure and the sum of the total energies of the crystal without the ligand and the ligand alone. The  $\Delta E_{\text{int,disp}}$  is the portion of the interaction energy that comes from the post-SCF dispersion correction in the PBE+D3 method.

| PBE + D3                   | $\Delta E_{\text{int}} / \text{eV}$ | $\Delta E_{\text{int,disp}} / \text{eV}$ | $\Delta E_{\text{int}} - \Delta E_{\text{int,disp}} / \text{eV}$ |
|----------------------------|-------------------------------------|------------------------------------------|------------------------------------------------------------------|
| <b>Re<sub>2</sub>-bpac</b> | -2.890                              | -2.252                                   | -0.644                                                           |
| <b>Re<sub>2</sub>-bpen</b> | -3.355                              | -2.148                                   | -1.186                                                           |
| <b>Re<sub>2</sub>-bpb</b>  | -3.242                              | -2.711                                   | -0.533                                                           |
| HSE06                      | $\Delta E_{\text{int}} / \text{eV}$ | $\Delta E_{\text{int,disp}} / \text{eV}$ | $\Delta E_{\text{int}} - \Delta E_{\text{int,disp}} / \text{eV}$ |
| <b>Re<sub>2</sub>-bpac</b> | -0.893                              | 0.000                                    | -0.893                                                           |
| <b>Re<sub>2</sub>-bpen</b> | -1.464                              | 0.000                                    | -1.464                                                           |
| <b>Re<sub>2</sub>-bpb</b>  | -0.812                              | 0.000                                    | -0.812                                                           |

**Comment to Table S64:** A quantitative analysis of the Re–ligand interactions was performed by computing the ligands' interaction energies ( $\Delta E_{\text{int}}$ ) within the crystal, calculated as:

$$\Delta E_{\text{int}} = E_{\text{xtal}} - E_{\text{xtal\_noL}} - E_{\text{L}},$$

where  $E_{\text{xtal}}$  is the total energy of the optimized crystal structure,  $E_{\text{xtal\_noL}}$  is the single-point energy of the crystal with the ligand removed, and  $E_{\text{L}}$  is the single-point energy of the crystal with the metal complex and cations removed. The computed  $\Delta E_{\text{int}}$  values are shown in Table S64 (at both the PBE+D3 and HSE06 levels of theory). Also shown for the PBE+D3 method is a decomposition of  $\Delta E_{\text{int}}$  into the contribution that comes from the post-SCF dispersion correction ( $\Delta E_{\text{int,disp}}$ ).

The PBE+D3 results in Table S64 show that the total ligand/environment interactions calculations all have comparable strengths to one another (between  $-2.8$  and  $-3.4$  eV per unit cell). The large contribution of the dispersion energy, as could be expected from the prevalence of non-covalent contacts between molecules, amounts to 66.1% for **Re<sub>2</sub>-bpac**, 54.9% for **Re<sub>2</sub>-bpb**, and 35.5% for **Re<sub>2</sub>-bpen**. If it is assumed that the remainder of the interaction energy is dominated by the ligand/metal-complex interaction, then it can be seen that the interaction between the ligand and the metal complexes seems weaker for **Re<sub>2</sub>-bpac/Re<sub>2</sub>-bpb** than for **Re<sub>2</sub>-bpen**. This clear separation of **Re<sub>2</sub>-bpen** from **Re<sub>2</sub>-bpb/Re<sub>2</sub>-bpac** aligns with their division into groups A and B in the main text; which corroborates that the main feature that defines the two groups is the nature of the Re...L contact. The strength of the non-dispersion contribution to the interaction is reproduced with the HSE06 functional, even somewhat enhanced.

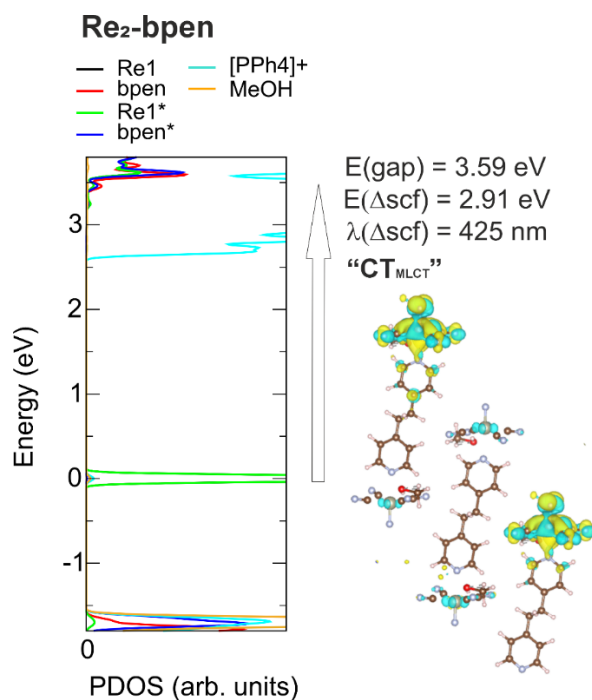

**Fig. S47** Computed molecule-projected densities of states (PDOS) for the **Re<sub>2</sub>-bpen** material, computed with the HSE06 functional at the PBE+D3 optimized geometry. The figure to the right shows the redistribution of electron density that is seen when generating a low-energy intermolecular CT excited state, CT<sub>MLCT</sub>, using a  $\Delta$ SCF approach, wherein blue/yellow indicates a loss/gain in electron density relative to the ground state.  $E(\text{gap})$  is an (estimated) energy difference between ground-state energy levels, and  $E(\Delta\text{scf})/\lambda(\Delta\text{scf})$  are differences between the total DFT energies of the ground and model CT<sub>MLCT</sub> excited state.

**Comment to Fig. S47:** Fig. S47 shows the analogous results for **Re<sub>2</sub>-bpen** as those which are shown for **Re<sub>2</sub>-bpac**, **Re<sub>2</sub>-bpb**, and **Re<sub>2</sub>-bpbp** in Fig. 6 of the main text. The CT<sub>MLCT</sub> state was generated in two steps: *i*) the first step generated the analogous CT1 state that is described in Figure 6 of the main text (i.e., the occupancies of the highest occupied and lowest unoccupied ground-state spin-orbitals were swapped), and *ii*) the second step was to change the orbital occupancies in the CT1 state in a way that reassigns the “excited” electron to the lowest unoccupied spin-orbital with Re1/bpen character (as identified by the site-projected densities of states that are written by the VASP program).

**Table S65** Computed energy spacings between the (ground-state) energy levels that best correspond to the  $p_{\pi} \rightarrow d_{xy} + p_{\text{CN}}$  and  $d_{xz} + d_{yz} + p_{\text{CN}} + p_{\text{N}} \rightarrow d_{xy} + p_{\text{CN}}$  emission processes that were characterized in the main manuscript.

| light-induced emission events                                                                   | <b>Re<sub>2</sub>-bpac</b> | <b>Re<sub>2</sub>-bpen</b> | <b>Re<sub>2</sub>-bpb</b> |
|-------------------------------------------------------------------------------------------------|----------------------------|----------------------------|---------------------------|
| $p_{\pi} \rightarrow d_{xy} + p_{\text{CN}} / \text{eV}$                                        | 2.2                        | 3.6                        | 2.6                       |
| $d_{xz} + d_{yz} + p_{\text{CN}} + p_{\text{N}} \rightarrow d_{xy} + p_{\text{CN}} / \text{eV}$ | 4.4                        | 4.3                        | 4.4                       |

**Comment to Table S65:** Table S65 shows the energy spacings between the ground-state orbitals that best characterize the  $p_{\pi} \rightarrow d_{xy} + p_{\text{CN}}$  and  $d_{xz} + d_{yz} + p_{\text{CN}} + p_{\text{N}} \rightarrow d_{xy} + p_{\text{CN}}$  emission processes, and it is seen that the differences between them are much smaller in **Re<sub>2</sub>-bpen** than in **Re<sub>2</sub>-bpb** and **Re<sub>2</sub>-bpac** materials. This qualitative agreement of solid-state models with the TD-DFT results from the molecular clusters (see the main manuscript and the detailed results of the molecular DFT/TD-DFT calculations above) further confirms that the molecular models are properly capturing the essential chemistry that occurs in the periodic crystals of investigated emissive solids.

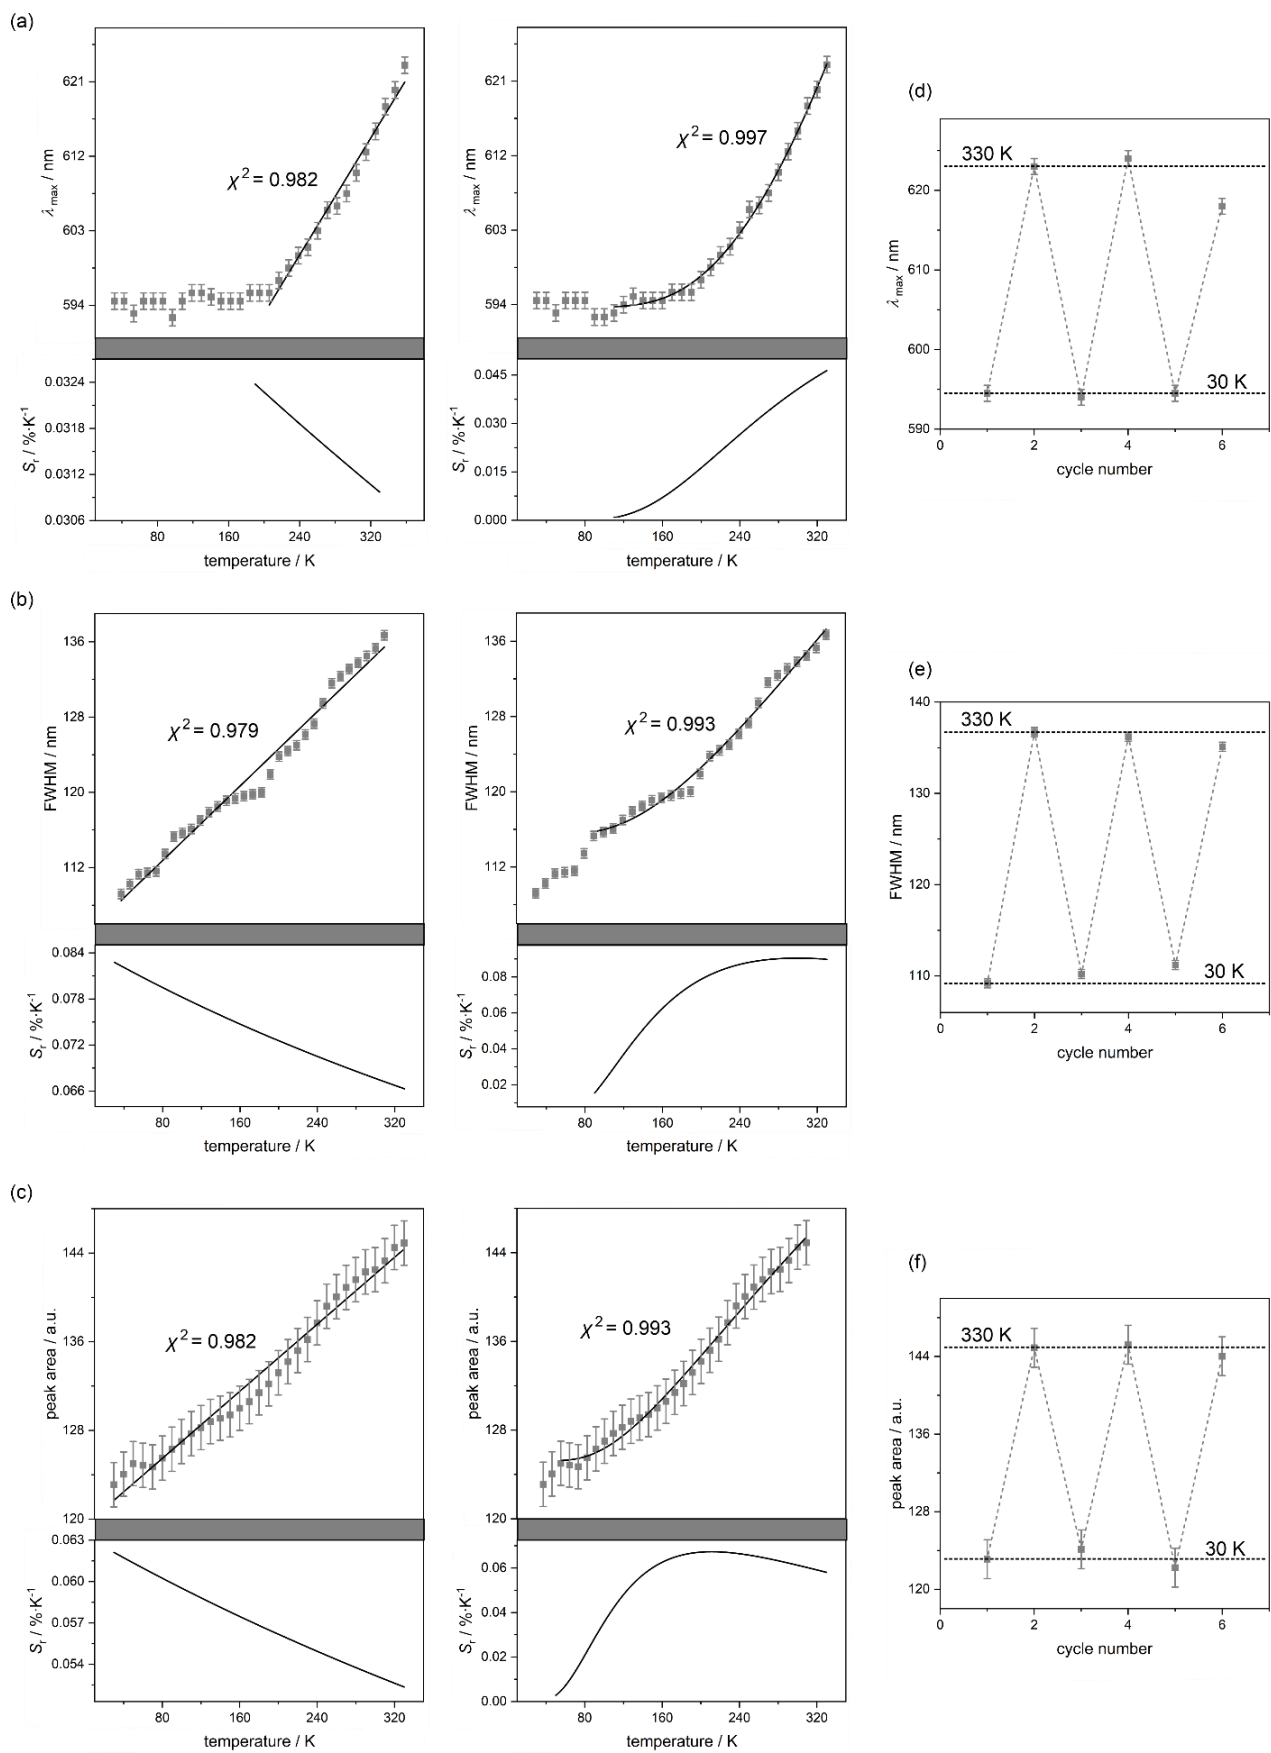

**Fig. S48** Temperature dependencies of the wavelength position of the emission maximum ( $\lambda_{\max}$ , a), the full width at half maximum of the emission band ( $FWHM$ , b), and the integrated emission intensity (peak area, c) for **Re<sub>2</sub>-CN** (see Fig. S25 and Table S27), presented with the best-fit curves (solid lines) obtained using the linear (left panel) and Mott-Seitz equations (right panel), together with the relative thermal sensitivity ( $S_i$ ) parameters (under the corresponding fits), and thermal repeatability of each of three discussed parameters along six consecutive measurements (d–f, corresponding to the a–c parts, respectively). The resulting best-fit parameters and used equations are gathered in Tables S66–S68.



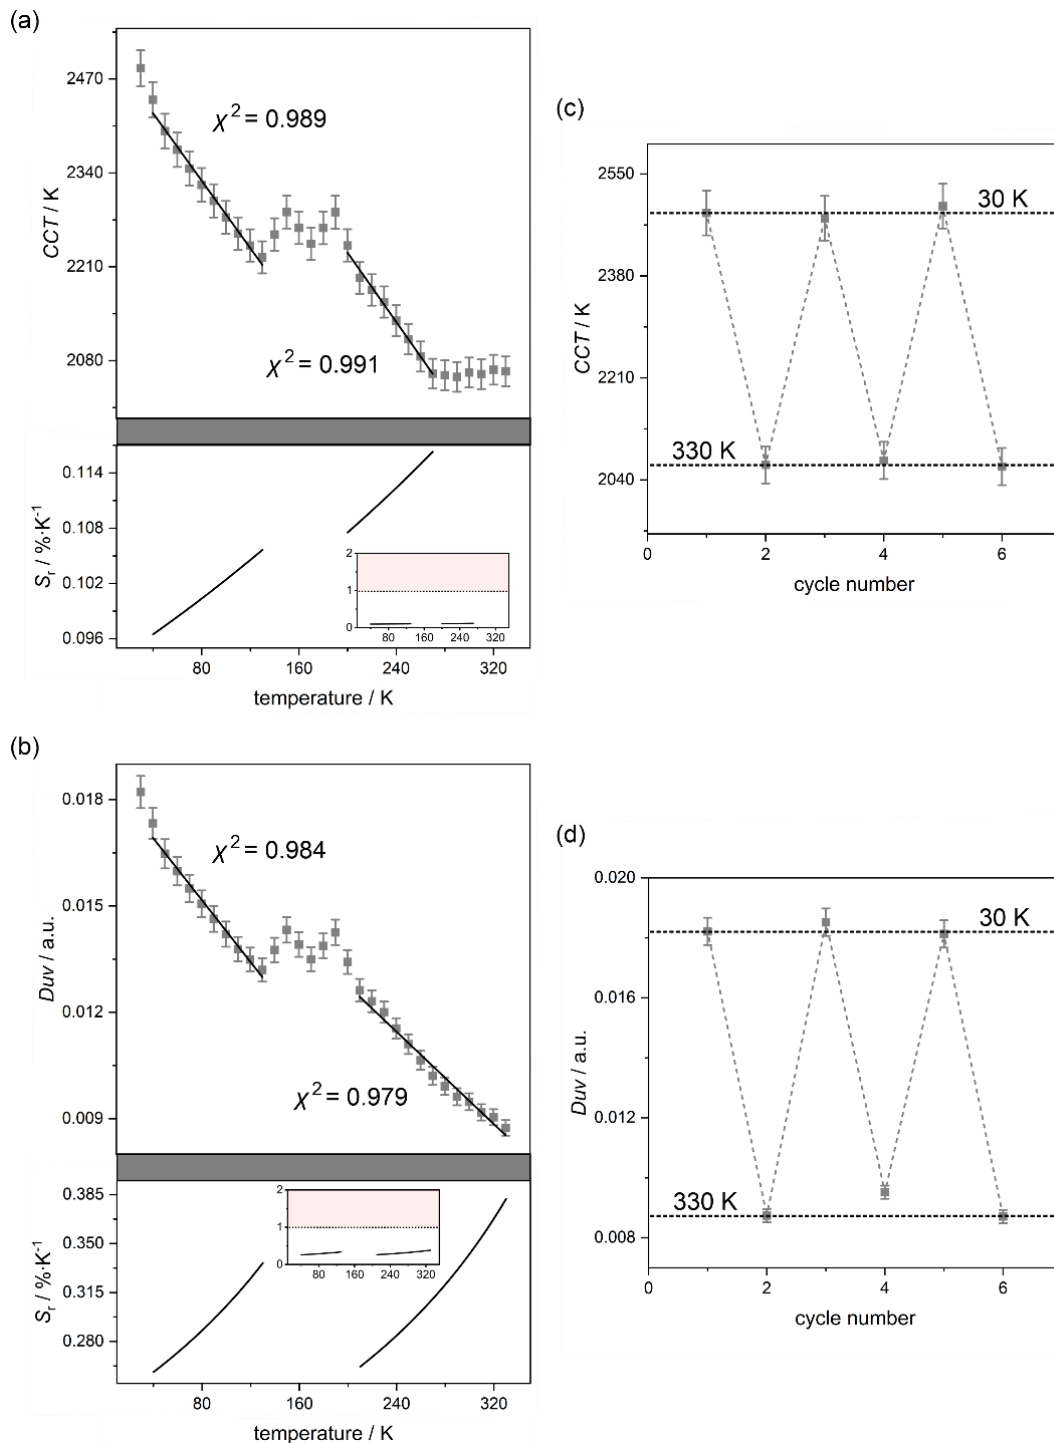

**Fig. S49** Temperature dependencies of the correlated color temperature (CCT, a) and  $D_{uv}$  value (b) calculated from the CIE 1931 chromaticity  $x$  and  $y$  parameters of the solid-state photoluminescent properties of  $\text{Re}_2\text{-CN}$  (see Fig. S25 and Table S28), shown with the best-fit curves (solid lines) obtained using the linear fitting, together with the relative thermal sensitivity ( $S_r$ ) parameters (under the corresponding fits), and thermal repeatability of each parameter of two discussed parameters along six consecutive measurements (c and d, corresponding to the a and b parts, respectively). The resulting best-fit parameters and employed equations are collected in Tables S69 and S70.

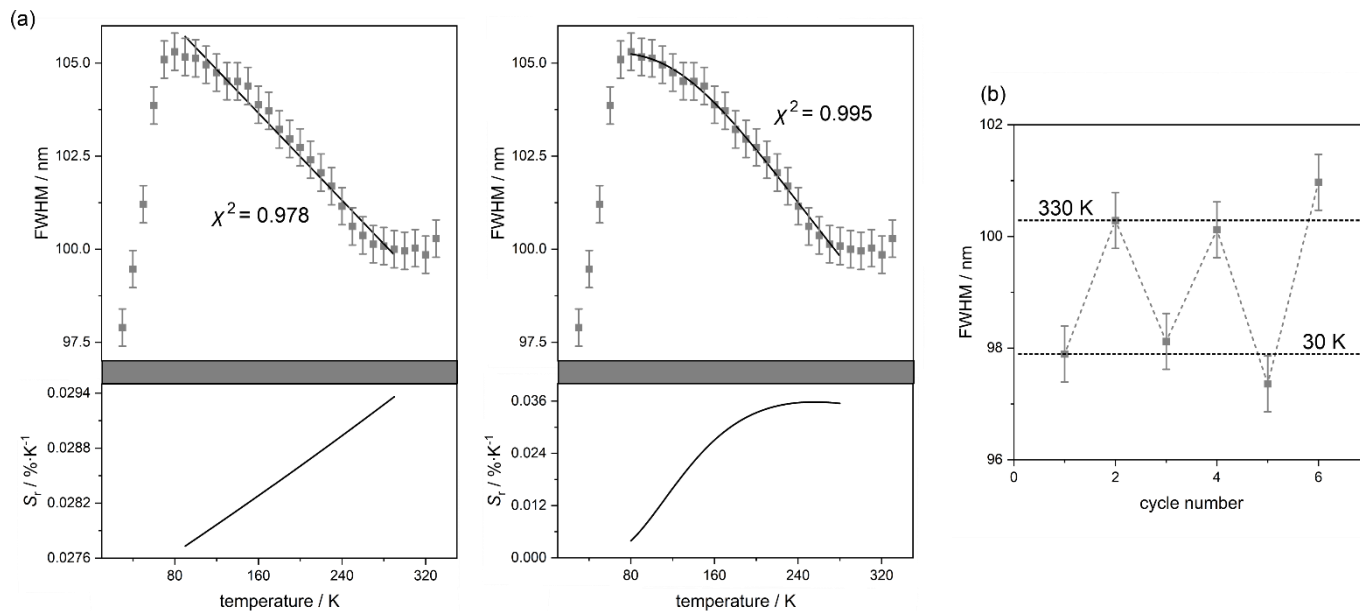

**Fig. S50** Temperature dependence of the full width at half maximum of the emission band (*FWHM*, a) for **Re<sub>2</sub>-en** (see Fig. S26 and Table S29), presented with the best-fit curves (solid lines) obtained using the linear (left panel) and Mott-Seitz equations (right panel), together with the relative thermal sensitivity ( $S_r$ ) parameters (under the corresponding fits), and thermal repeatability along six consecutive measurements (b). The resulting best-fit parameters and used equations are gathered in Table S67.

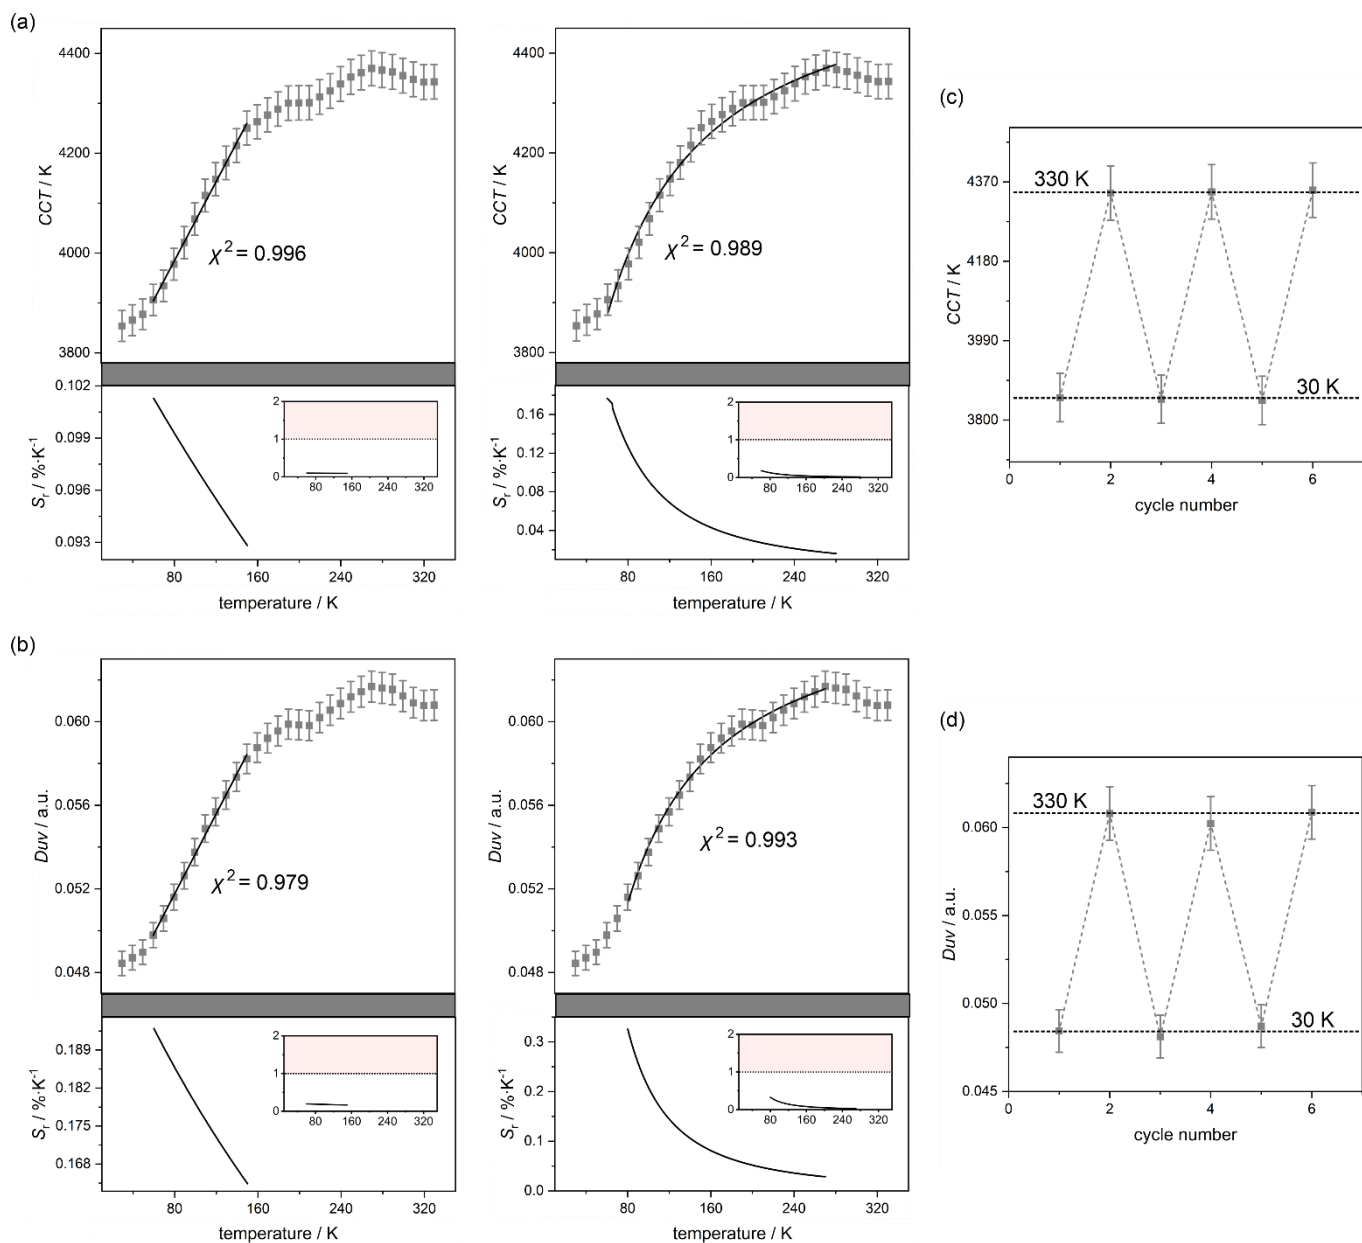

**Fig. S51** Temperature dependencies of the correlated color temperature (CCT, a) and  $D_{uv}$  value (b) calculated from the CIE 1931 chromaticity  $x$  and  $y$  parameters of the solid-state photoluminescent properties of **Re<sub>2</sub>-en** (see Fig. S26 and Table S30), shown with the best-fit curves (solid lines) obtained using the linear (left panel) and Mott-Seitz equations (right panel), together with the relative thermal sensitivity ( $S_T$ ) parameters (under the corresponding fits), and thermal repeatability of each parameter of two discussed parameters along six consecutive measurements (c and d, corresponding to the a and b parts, respectively). The resulting best-fit parameters and employed equations are gathered in Tables S69 and S70.

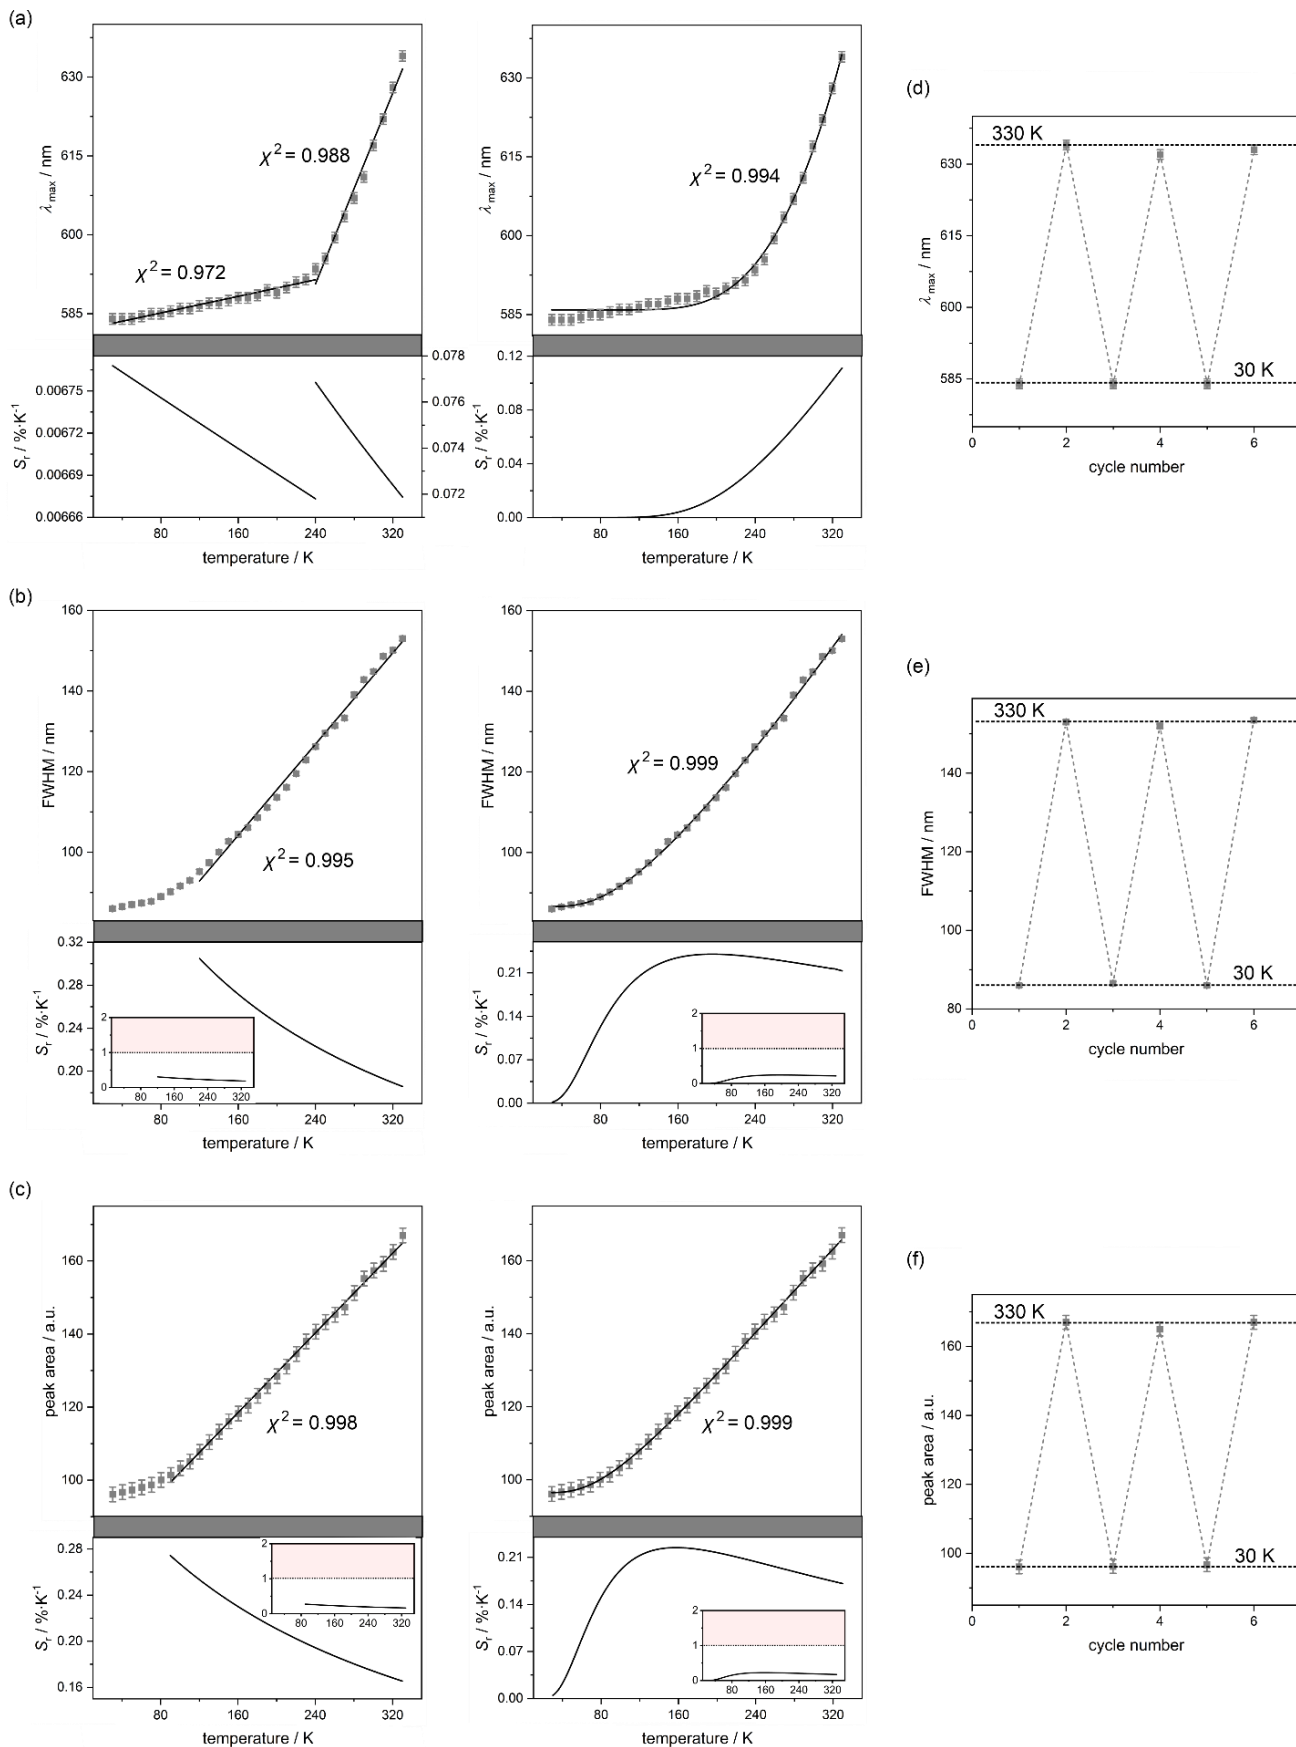

**Fig. S52** Temperature dependencies of the wavelength position of the emission maximum ( $\lambda_{\text{max}}$ , a), the full width at half maximum of the emission band (FWHM, b), and the integrated emission intensity (peak area, c) for  $\text{Re}_2\text{-bpy}$  (see Fig. S27 and Table S31), presented with the best-fit curves (solid lines) obtained using the linear (left panel) and Mott-Seitz equations (right panel), together with the relative thermal sensitivity ( $S_T$ ) parameters (under the corresponding fits), and thermal repeatability of each of three discussed parameters along six consecutive measurements (d–f, corresponding to the a–c parts, respectively). The resulting best-fit parameters and used equations are gathered in Tables S66–S68.

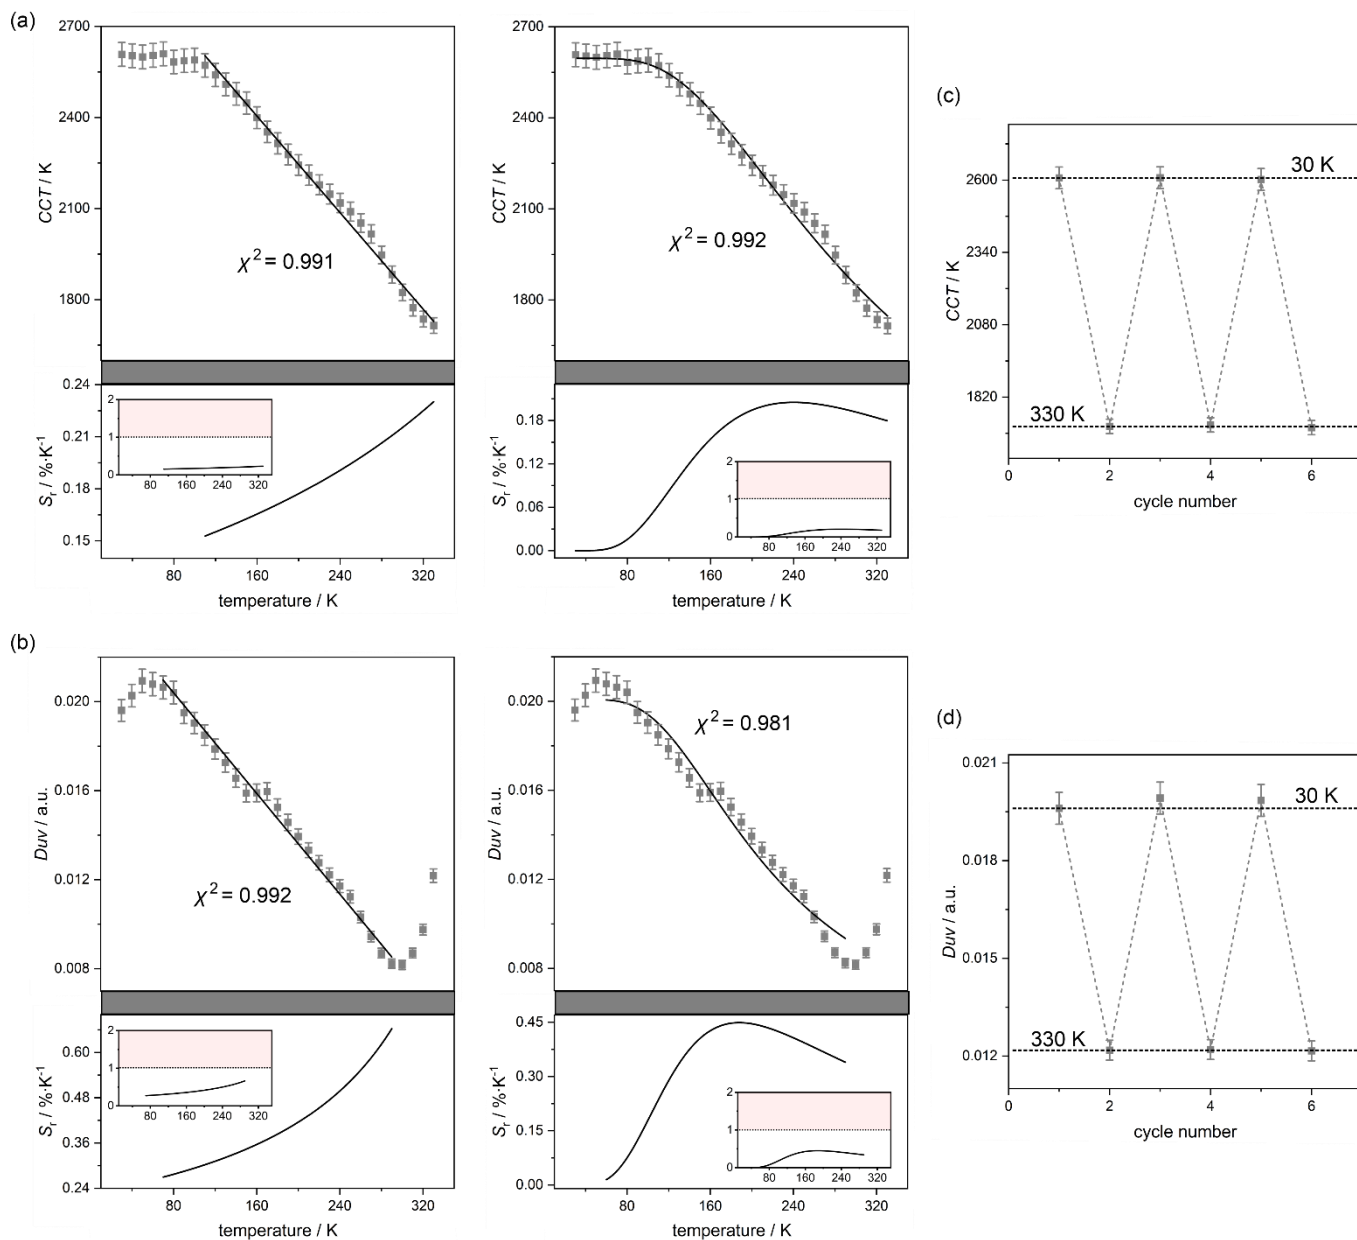

**Fig. S53** Temperature dependencies of the correlated color temperature (CCT, a) and  $D_{uv}$  value (b) calculated from the CIE 1931 chromaticity  $x$  and  $y$  parameters of the solid-state photoluminescent properties of  $\text{Re}_2\text{-bpy}$  (see Fig. S27 and Table S32), shown with the best-fit curves (solid lines) obtained using the linear (left panel) and Mott-Seitz equations (right panel), together with the relative thermal sensitivity ( $S_T$ ) parameters (under the corresponding fits), and thermal repeatability of each of two discussed parameters along six consecutive measurements (c and d, corresponding to the a and b parts, respectively). The resulting best-fit parameters and employed equations are gathered in Tables S69 and S70.

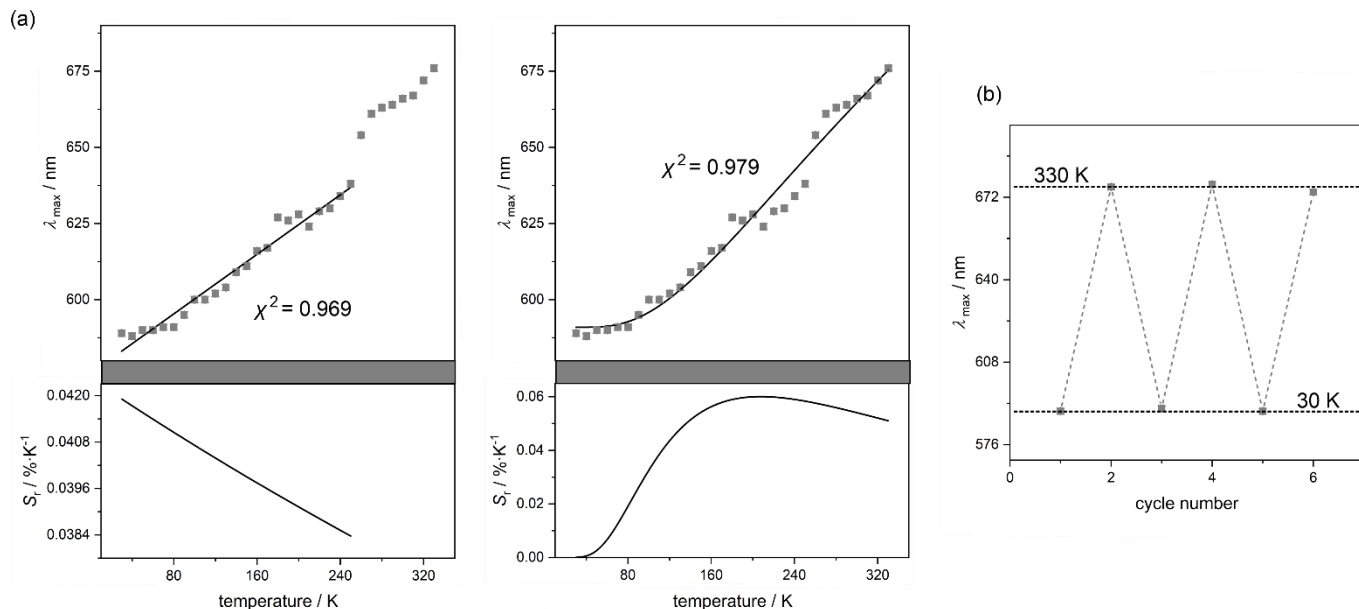

**Fig. S54** Temperature dependence of the wavelength position of the emission maximum ( $\lambda_{\max}$ , a) for **Re<sub>2</sub>-bpac** (see Fig. S28 and Table S33), presented with the best-fit curves (solid lines) obtained using the linear (left panel) and Mott-Seitz equations (right panel), together with the relative thermal sensitivity ( $S_r$ ) parameters (under the corresponding fits), and thermal repeatability of each of two discussed parameters along six consecutive measurements (b). The resulting best-fit parameters and used equations are gathered in Table S66.

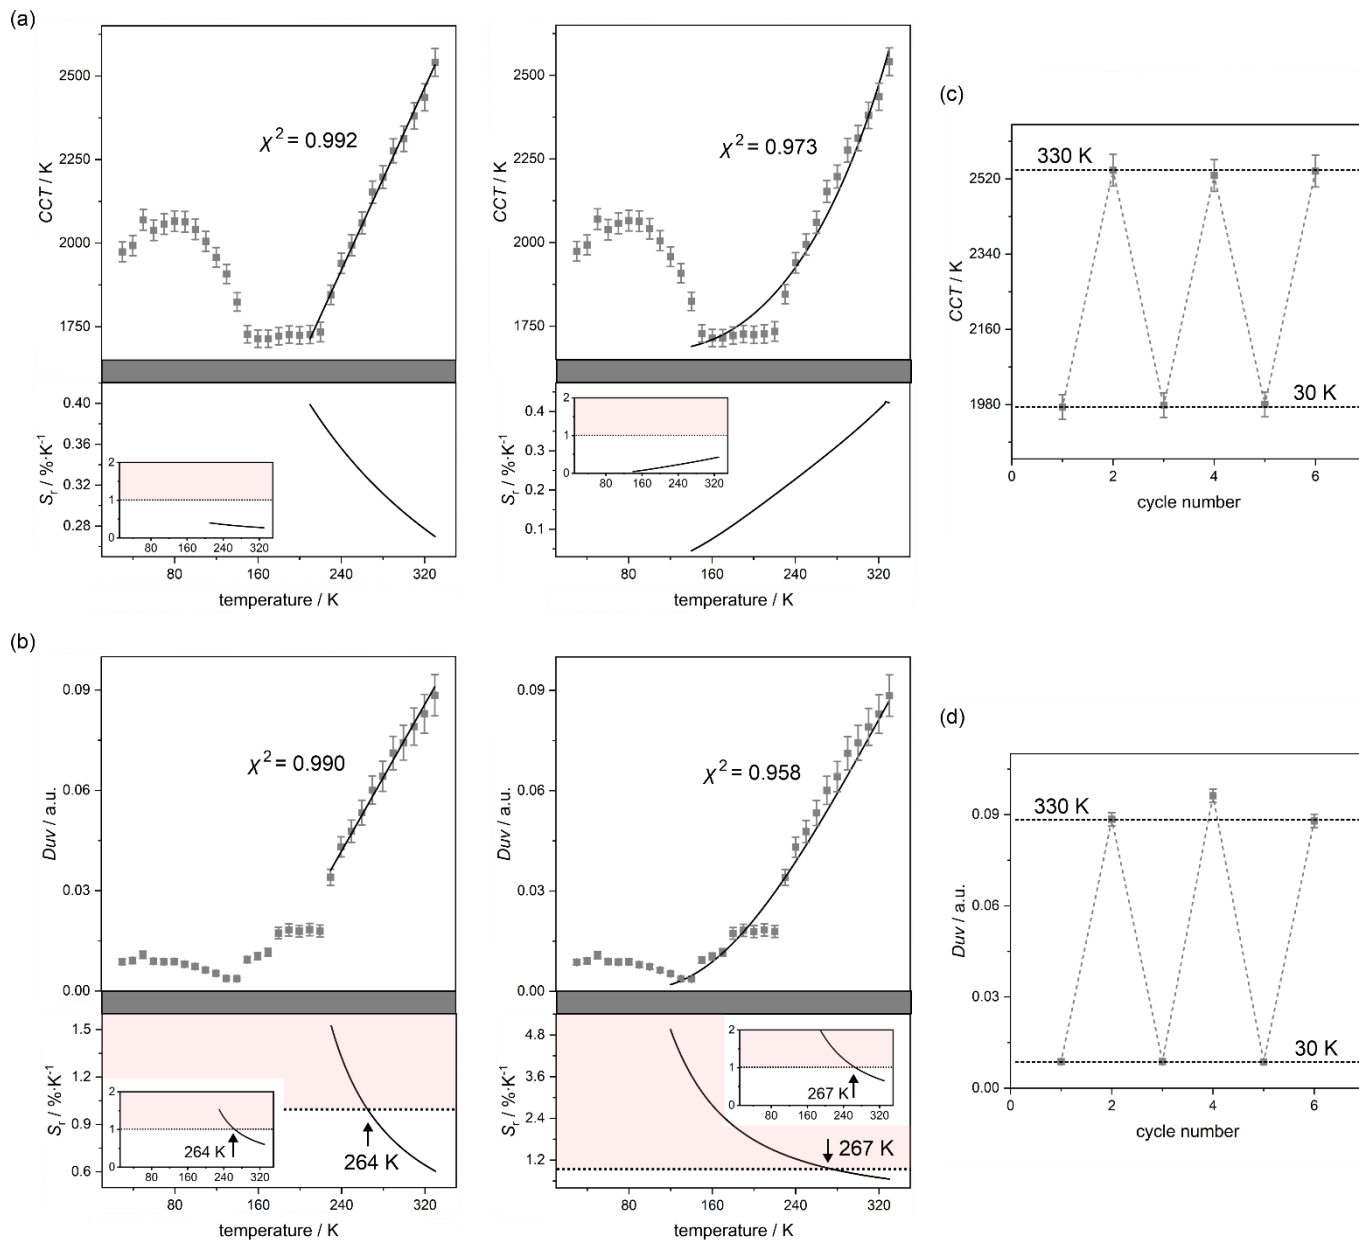

**Fig. S55** Temperature dependencies of the correlated color temperature (CCT, a) and  $D_{uv}$  value (b) calculated from the CIE 1931 chromaticity  $x$  and  $y$  parameters of the solid-state photoluminescent properties of **Re<sub>2</sub>-bpac** (see Fig. S28 and Table S34), shown with the best-fit curves (solid lines) obtained using the linear (left panel) and Mott-Seitz equations (right panel), together with the relative thermal sensitivity ( $S_T$ ) parameters (under the corresponding fits), and thermal repeatability of each of two discussed parameters along six consecutive measurements (c and d, corresponding to the a and b parts, respectively). The resulting best-fit parameters and employed equations are gathered in Tables S69 and S70.

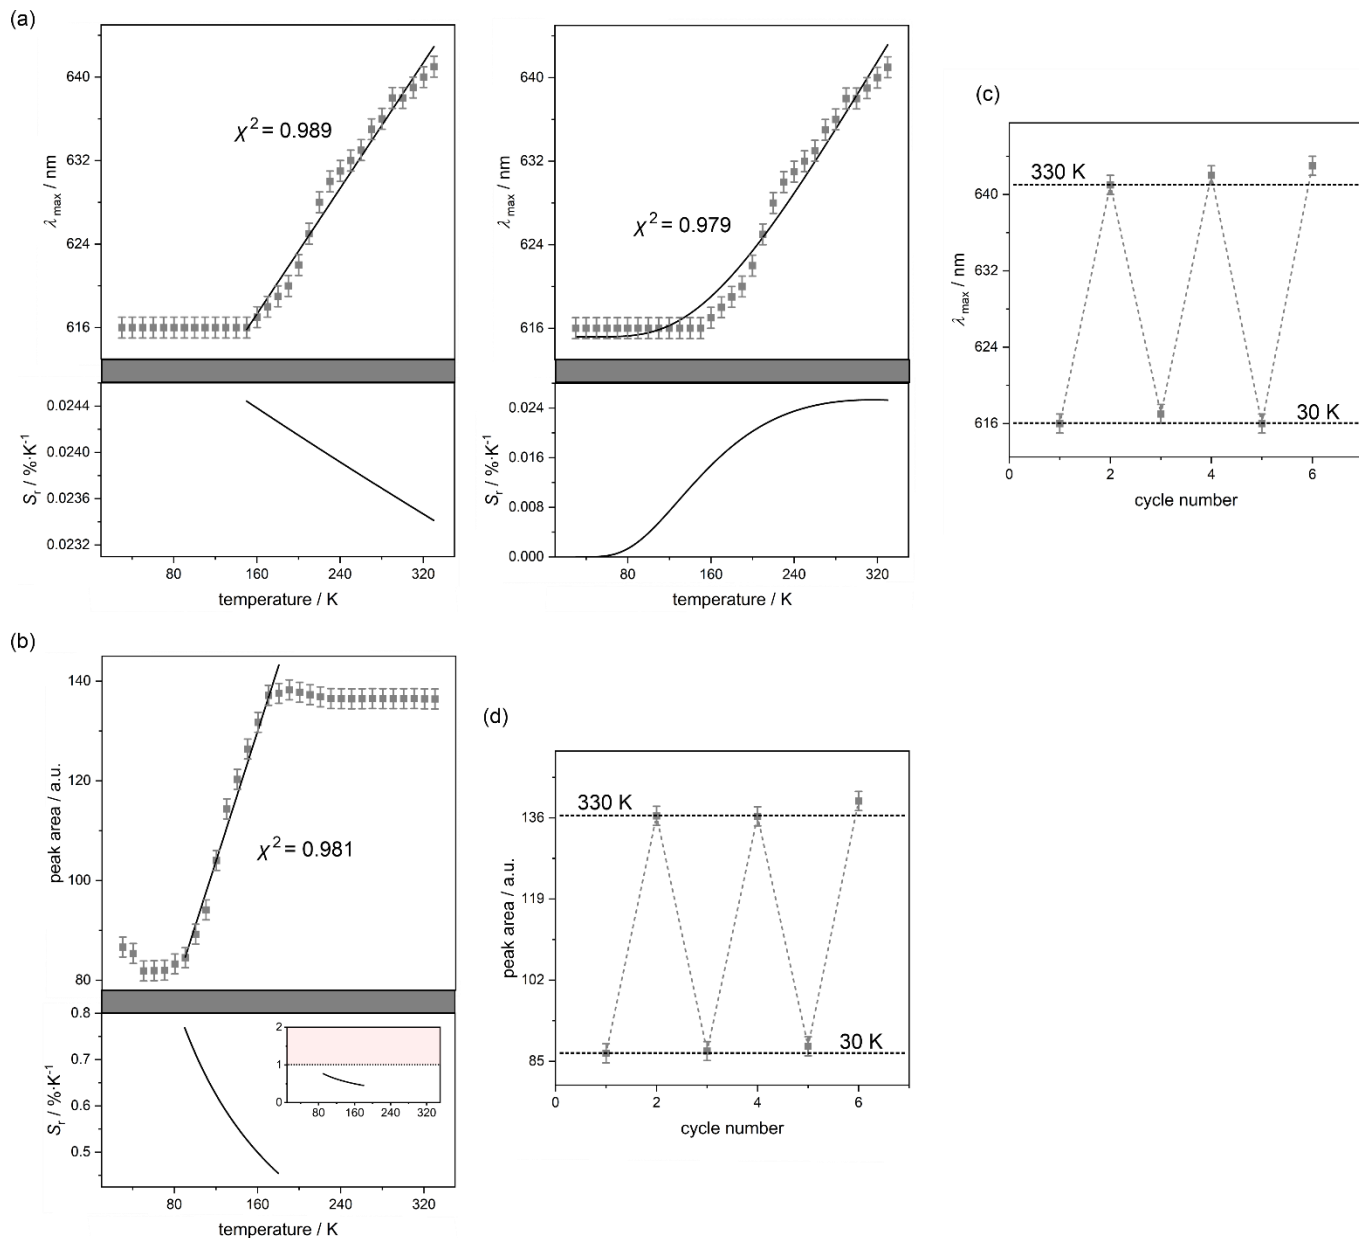

**Fig. S56** Temperature dependencies of the wavelength position of the emission maximum ( $\lambda_{\max}$ , a), and the integrated emission intensity (peak area, b) for  $\text{Re}_2\text{-bpee}$  (see Fig. S29 and Table S35), presented with the best-fit curves (solid lines) obtained using the linear (left panel) and Mott-Seitz equations (right panel, only for the b part), together with the relative thermal sensitivity ( $S_r$ ) parameters (under the corresponding fits), and thermal repeatability of each of two discussed parameters along six consecutive measurements (c and d, corresponding to the a and b parts, respectively). The resulting best-fit parameters and used equations are gathered in Tables S66 and S68.



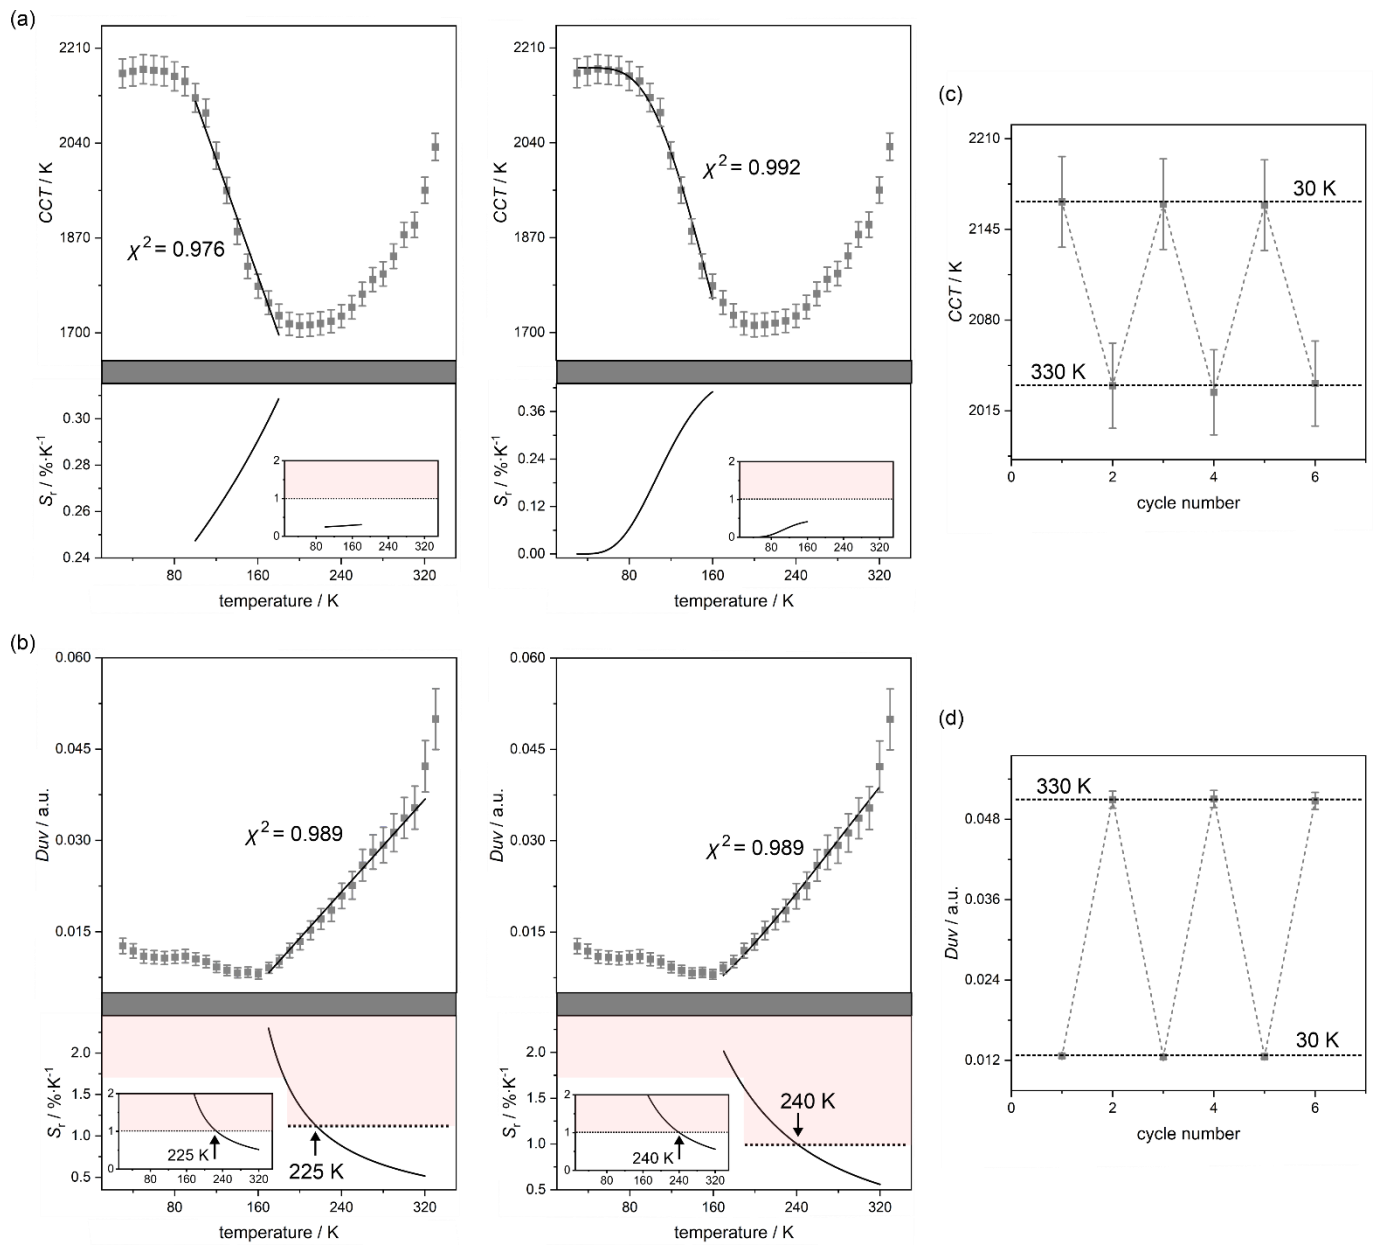

**Fig. S57** Temperature dependencies of the correlated color temperature (CCT, a) and  $D_{uv}$  value (b) calculated from the CIE 1931 chromaticity  $x$  and  $y$  parameters of the solid-state photoluminescent properties of  $\text{Re}_2\text{-bpee}$  (see Fig. S29 and Table S36), shown with the best-fit curves (solid lines) obtained using the linear (left panel) and Mott-Seitz equations (right panel), together with the relative thermal sensitivity ( $S_r$ ) parameters (under the corresponding fits), and thermal repeatability of each of two discussed parameters along six consecutive measurements (c and d, corresponding to the a and b parts, respectively). The resulting best-fit parameters and employed equations are gathered in Tables S69 and S70.

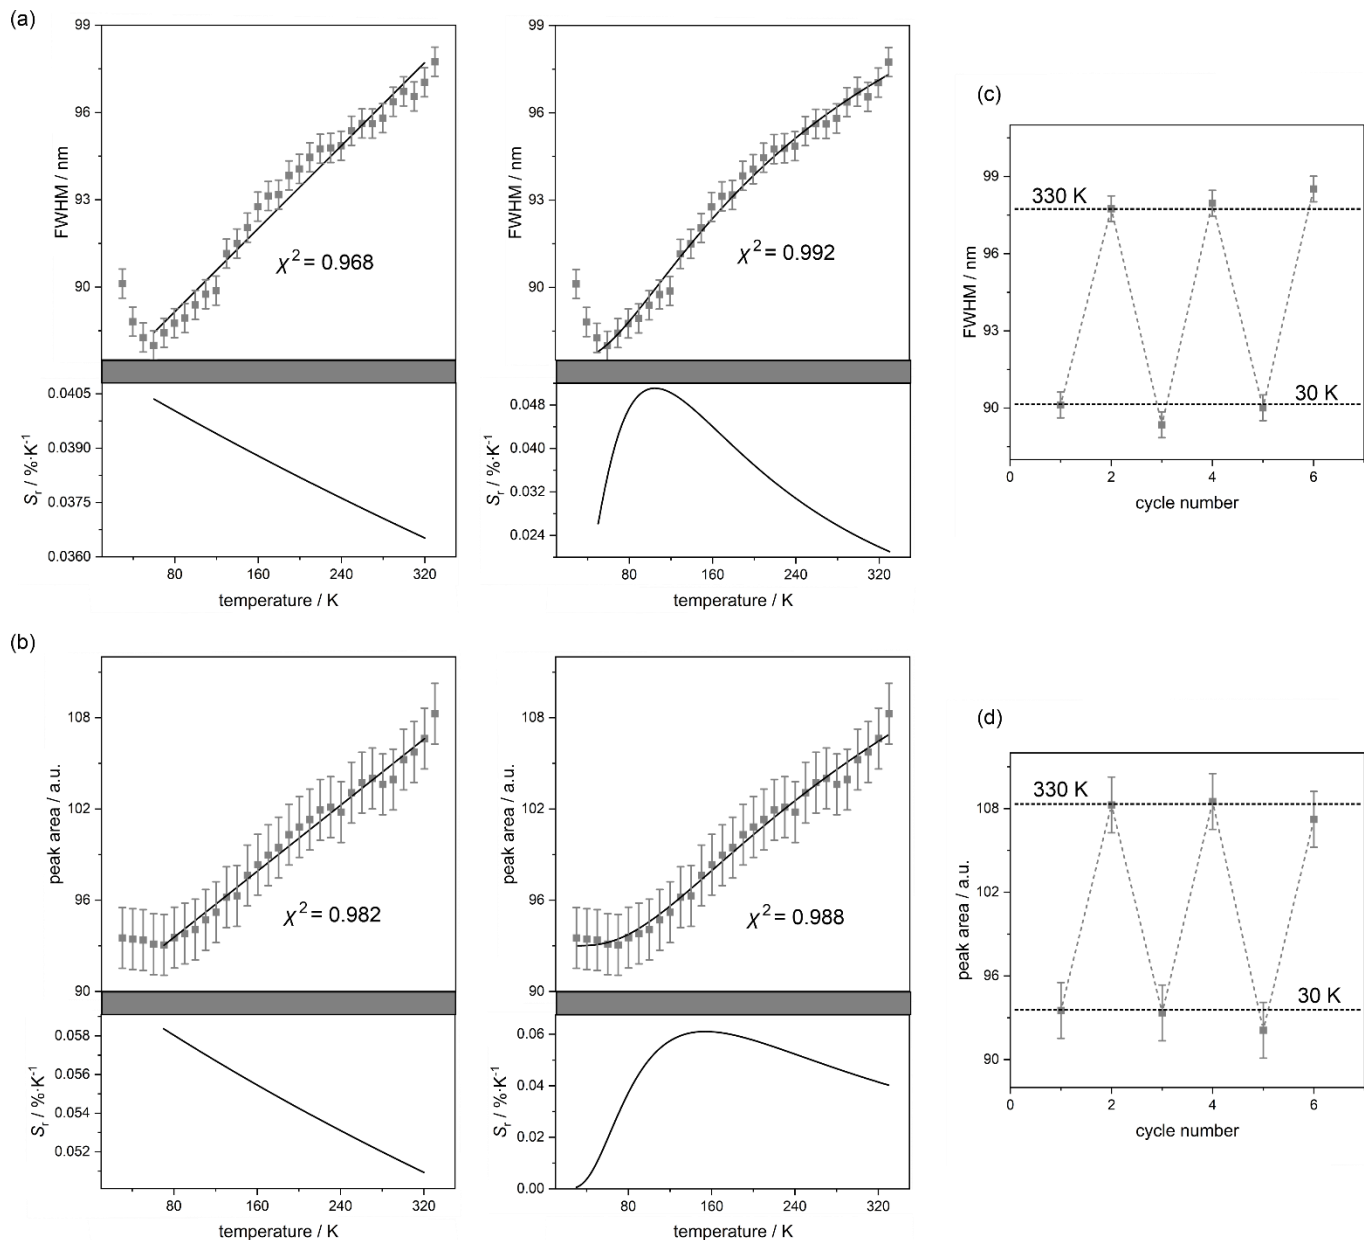

**Fig. S58** Temperature dependencies of the full width at half maximum of the emission band (*FWHM*, a), and the integrated emission intensity (peak area, b) for  $\text{Re}_2\text{-bpen}$  (see Fig. S30 and Table S37), presented with the best-fit curves (solid lines) obtained using the linear (left panel) and Mott-Seitz equations (right panel), together with the relative thermal sensitivity ( $S_T$ ) parameters (under the corresponding fits), and thermal repeatability of each of two discussed parameters along six consecutive measurements (c and d, corresponding to the a and b parts, respectively). The resulting best-fit parameters and used equations are gathered in Tables S67 and S68.

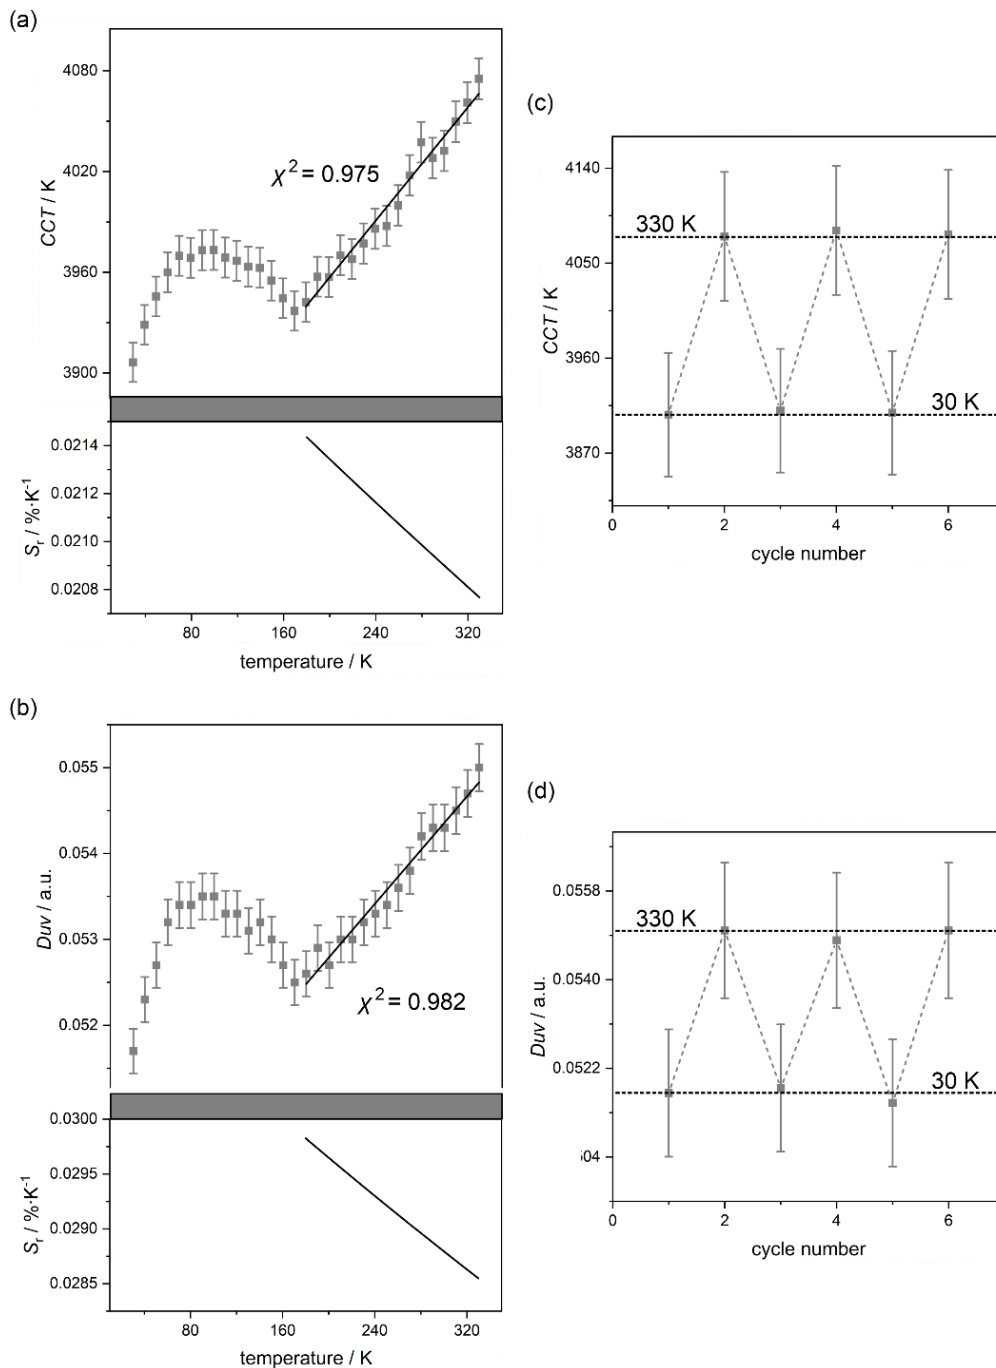

**Fig. S59** Temperature dependencies of the correlated color temperature (CCT, a) and  $D_{uv}$  value (b) calculated from the CIE 1931 chromaticity  $x$  and  $y$  parameters of the solid-state photoluminescent properties of  $\text{Re}_2\text{-bpen}$  (see Fig. S30 and Table S38), shown with the best-fit curves (solid lines) obtained using the linear fitting, together with the relative thermal sensitivity ( $S_r$ ) parameters (under the corresponding fits), and thermal repeatability of each parameter along six consecutive measurements (c and d, corresponding to the a and b parts, respectively). The resulting best-fit parameters and employed equations are gathered in Tables S69 and S70.

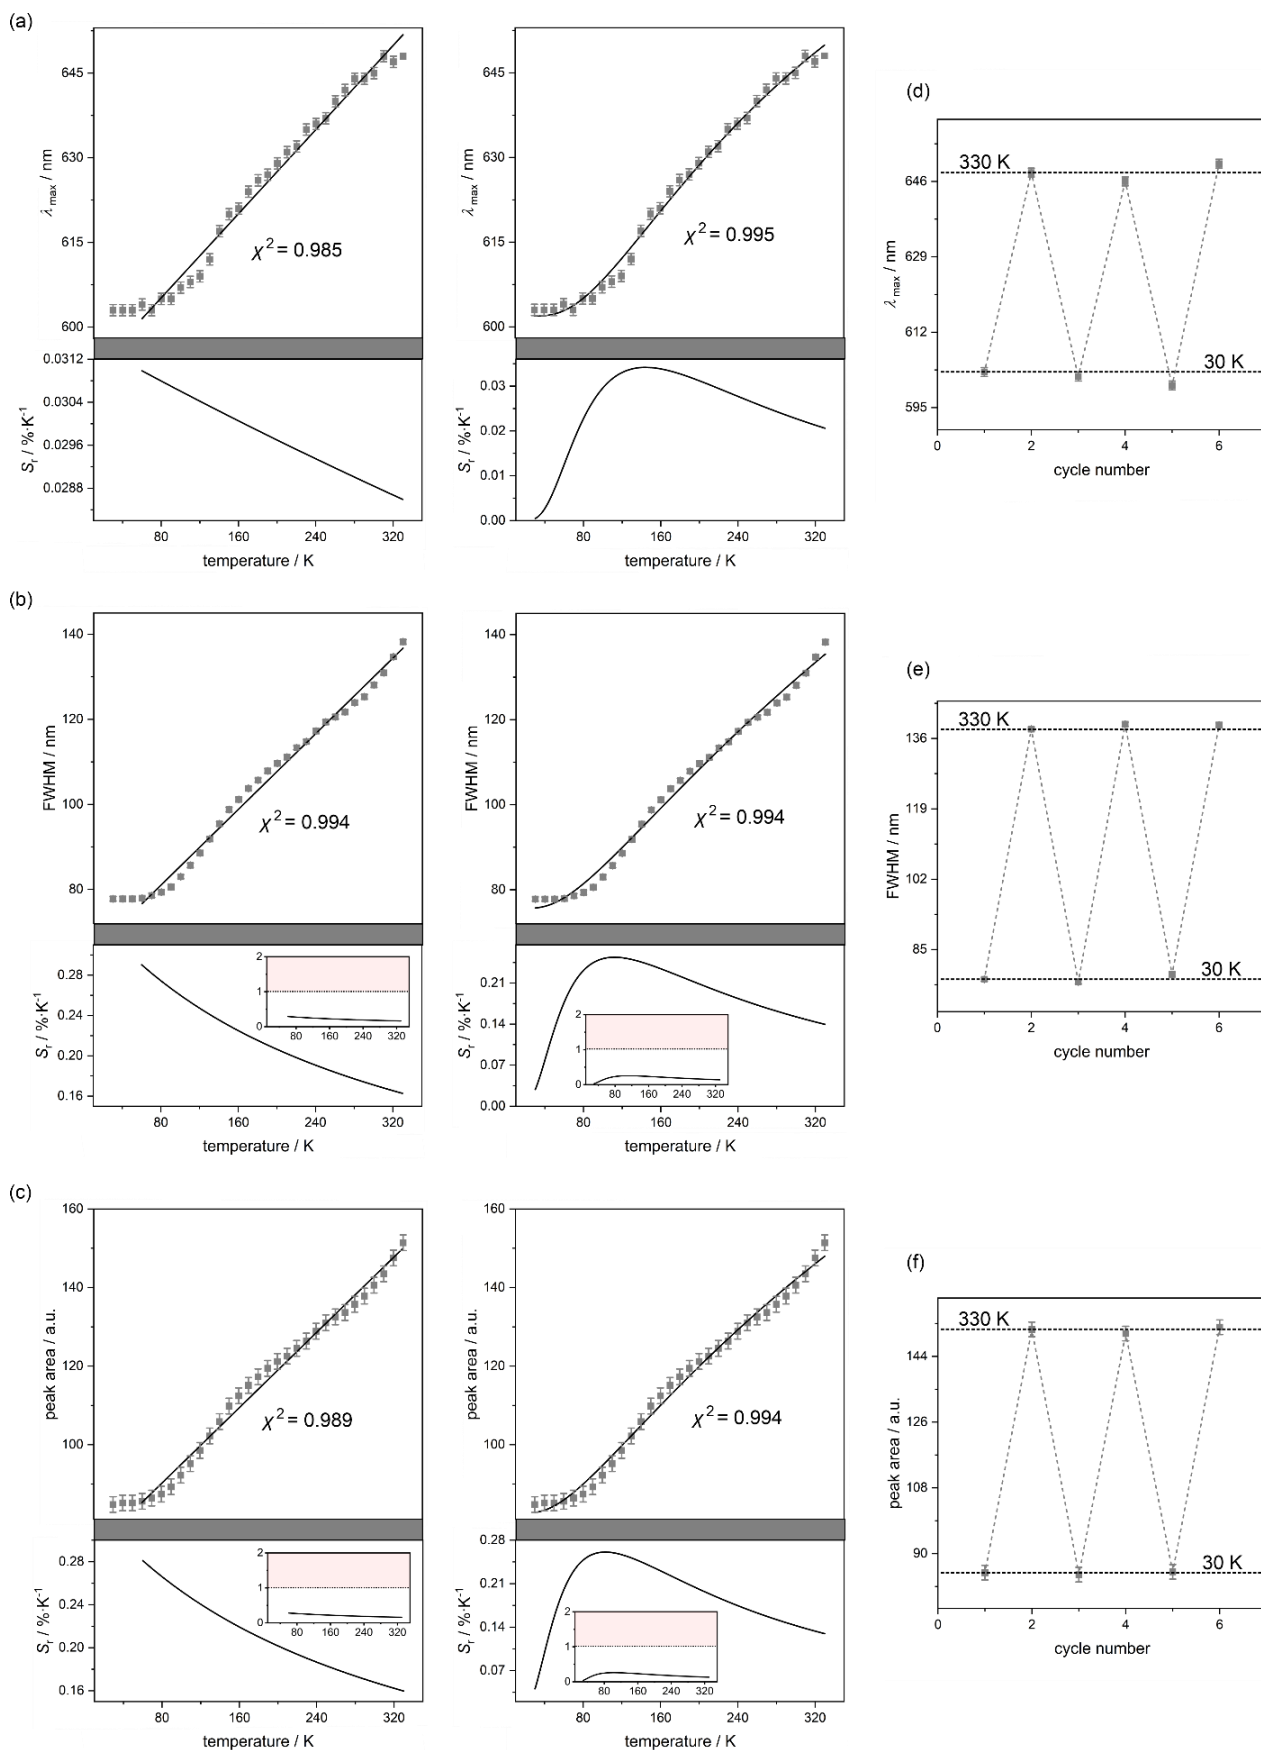

**Fig. S60** Temperature dependencies of the wavelength position of the emission maximum ( $\lambda_{max}$ , a), the full width at half maximum of the emission band ( $FWHM$ , b), and the integrated emission intensity (peak area, c) for **Re<sub>2</sub>-bpb** (see Fig. S31 and Table S39), presented with the best-fit curves (solid lines) obtained using the linear (left panel) and Mott-Seitz equations (right panel), together with the relative thermal sensitivity ( $S_T$ ) parameters (under the corresponding fits), and thermal repeatability of each of three discussed parameters along six consecutive measurements (d–f, corresponding to the a–c parts, respectively). The resulting best-fit parameters and used equations are gathered in Tables S66–S68.

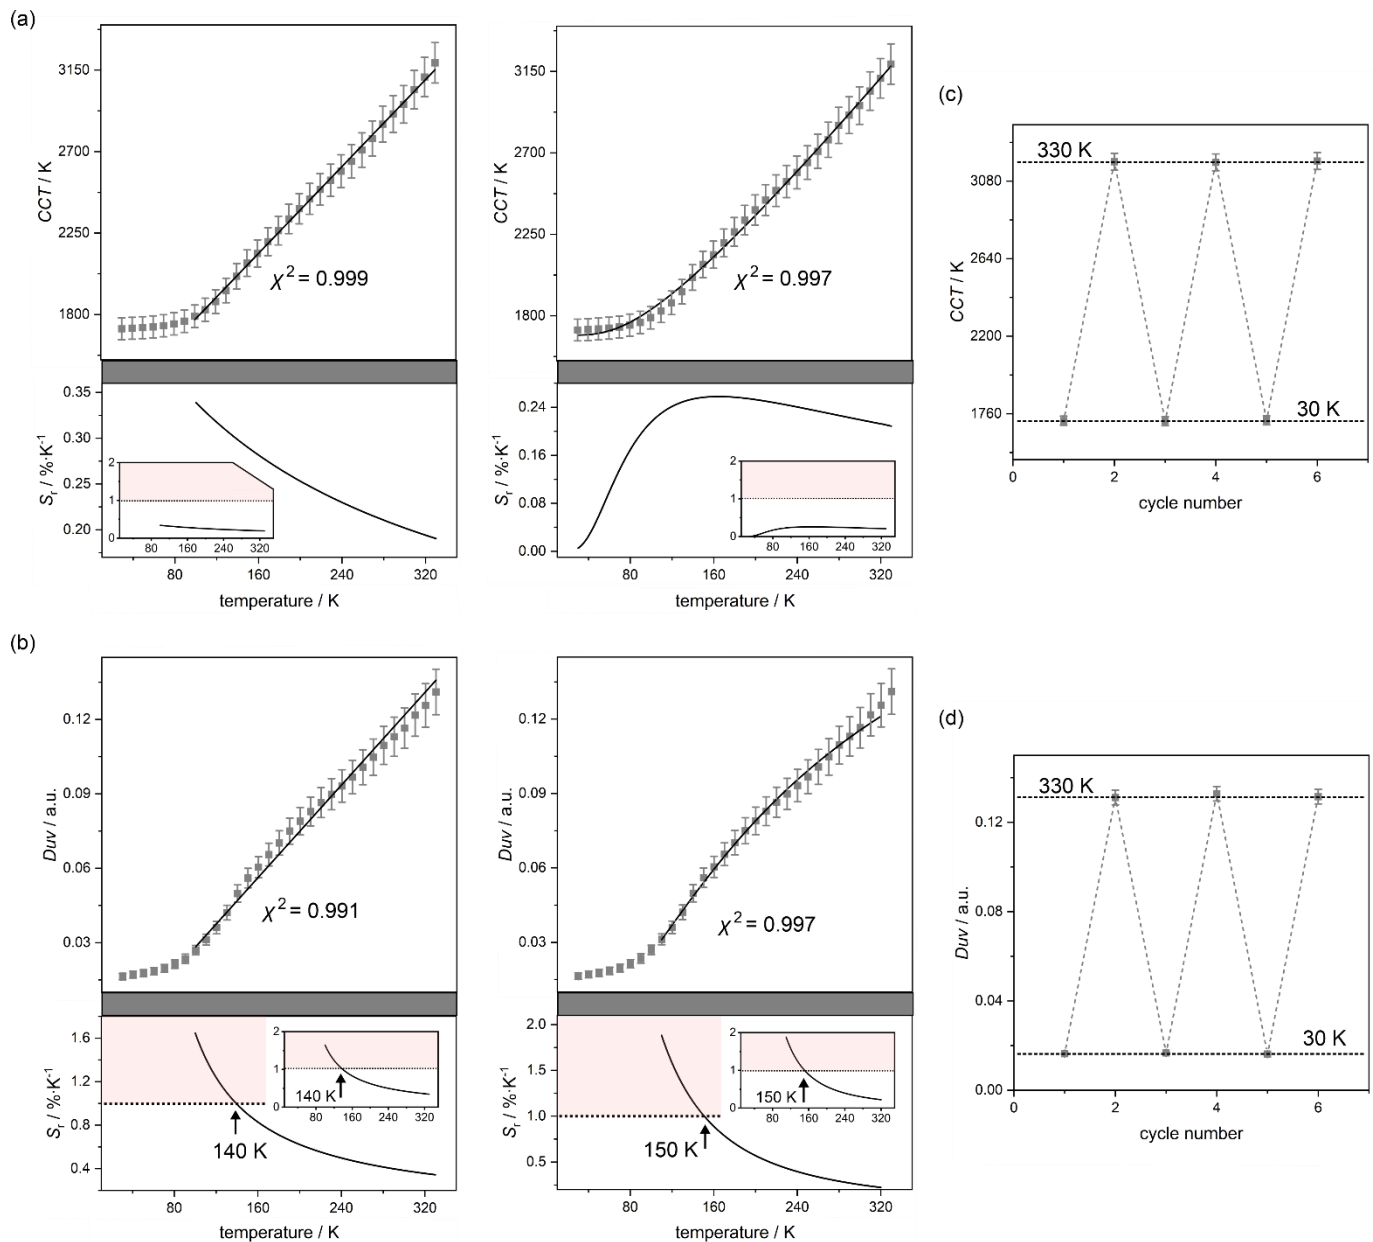

**Fig. S61** Temperature dependencies of the correlated color temperature (CCT, a) and  $D_{uv}$  value (b) calculated from the CIE 1931 chromaticity  $x$  and  $y$  parameters of the solid-state photoluminescent properties of  $\text{Re}_2\text{-bpb}$  (see Fig. S31 and Table S40), shown with the best-fit curves (solid lines) obtained using the linear (left panel) and Mott-Seitz equations (right panel), together with the relative thermal sensitivity ( $S_r$ ) parameters (under the corresponding fits), and thermal repeatability of each of two discussed parameters along six consecutive measurements (c and d, corresponding to the a and b parts, respectively). The resulting best-fit parameters and employed equations are gathered in Tables S69 and S70.

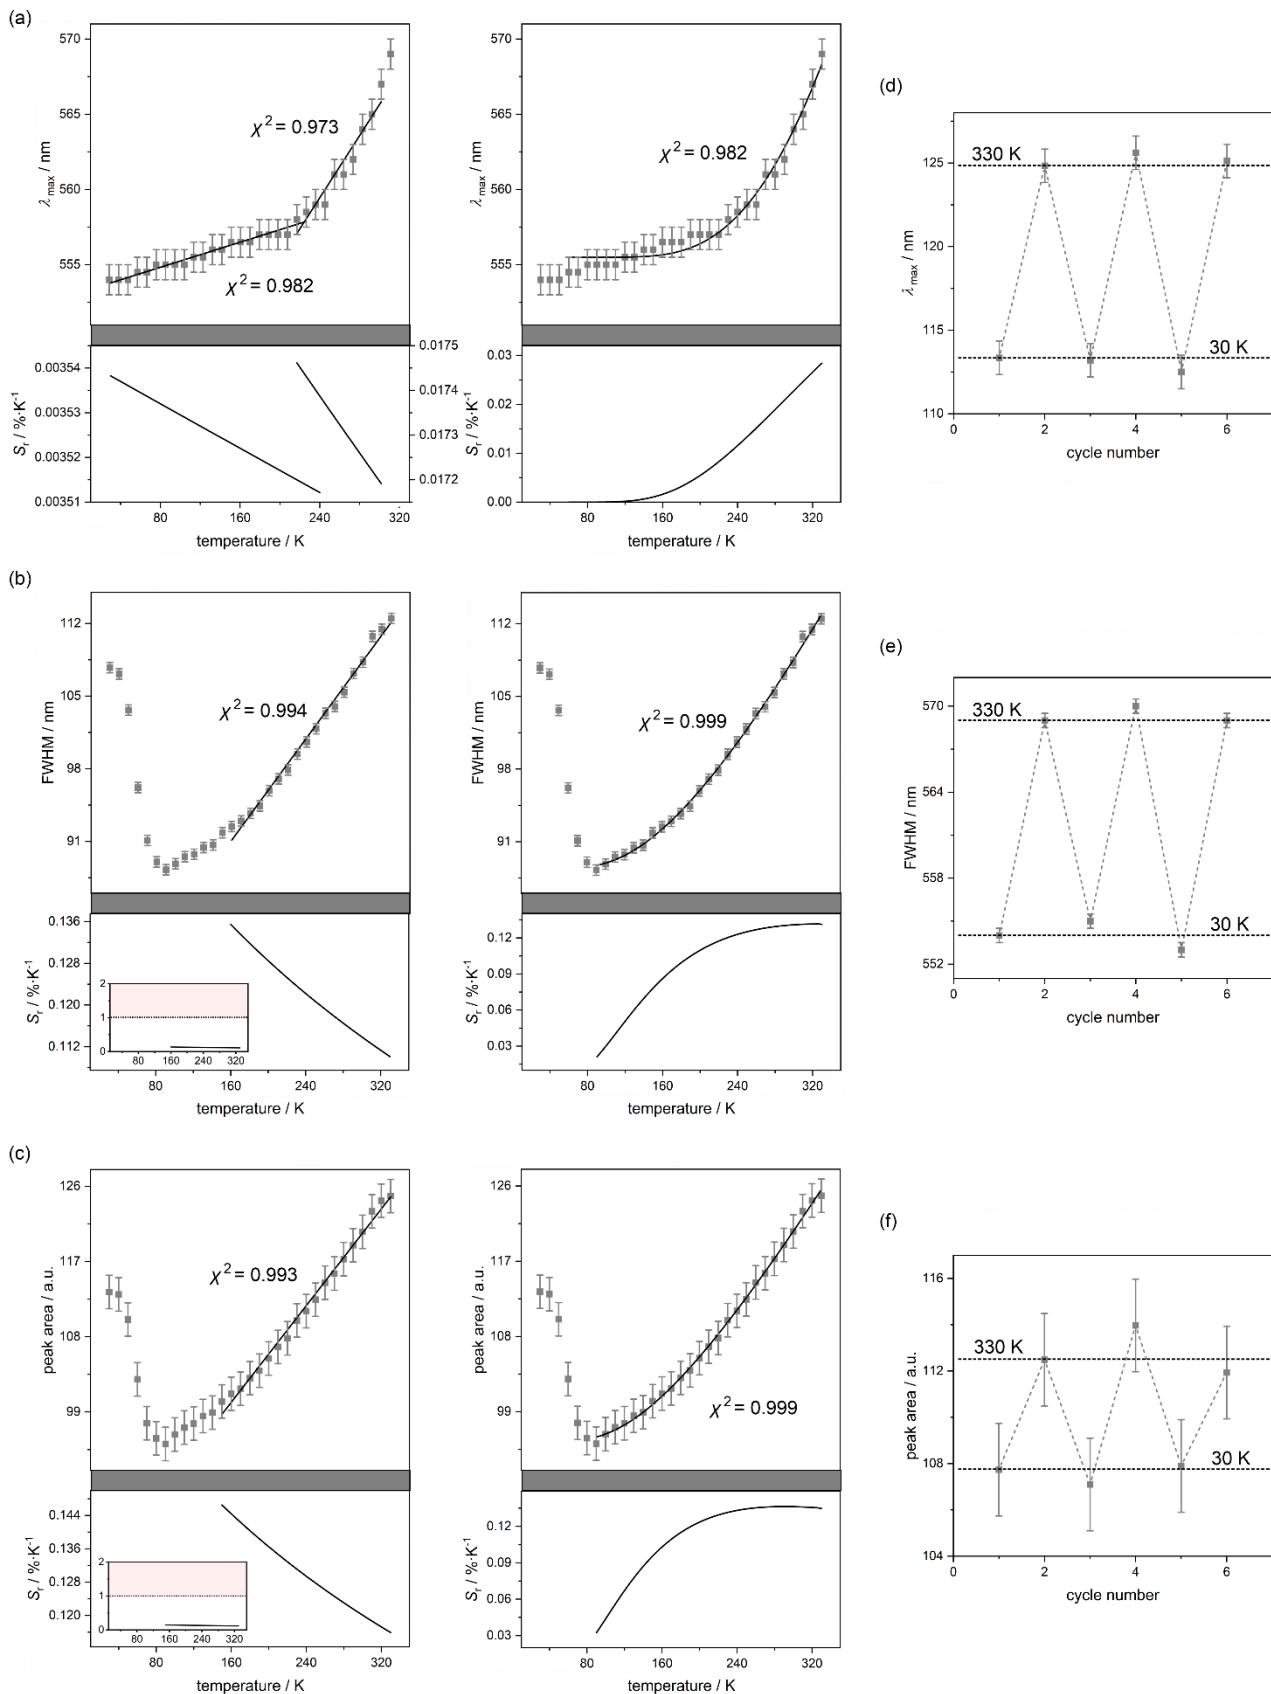

**Fig. S62** Temperature dependencies of the wavelength position of the emission maximum ( $\lambda_{\max}$ , a), the full width at half maximum of the emission band (FWHM, b), and the integrated emission intensity (peak area, c) for **Re<sub>2</sub>-bpbb** (see Fig. S32 and Table S41), presented with the best-fit curves (solid lines) obtained using the linear (left panel) and Mott-Seitz equations (right panel), together with the relative thermal sensitivity ( $S_T$ ) parameters (under the corresponding fits), and thermal repeatability of each of three discussed parameters along six consecutive measurements (d–f, corresponding to the a–c parts, respectively). The resulting best-fit parameters and used equations are gathered in Tables S66–S68.

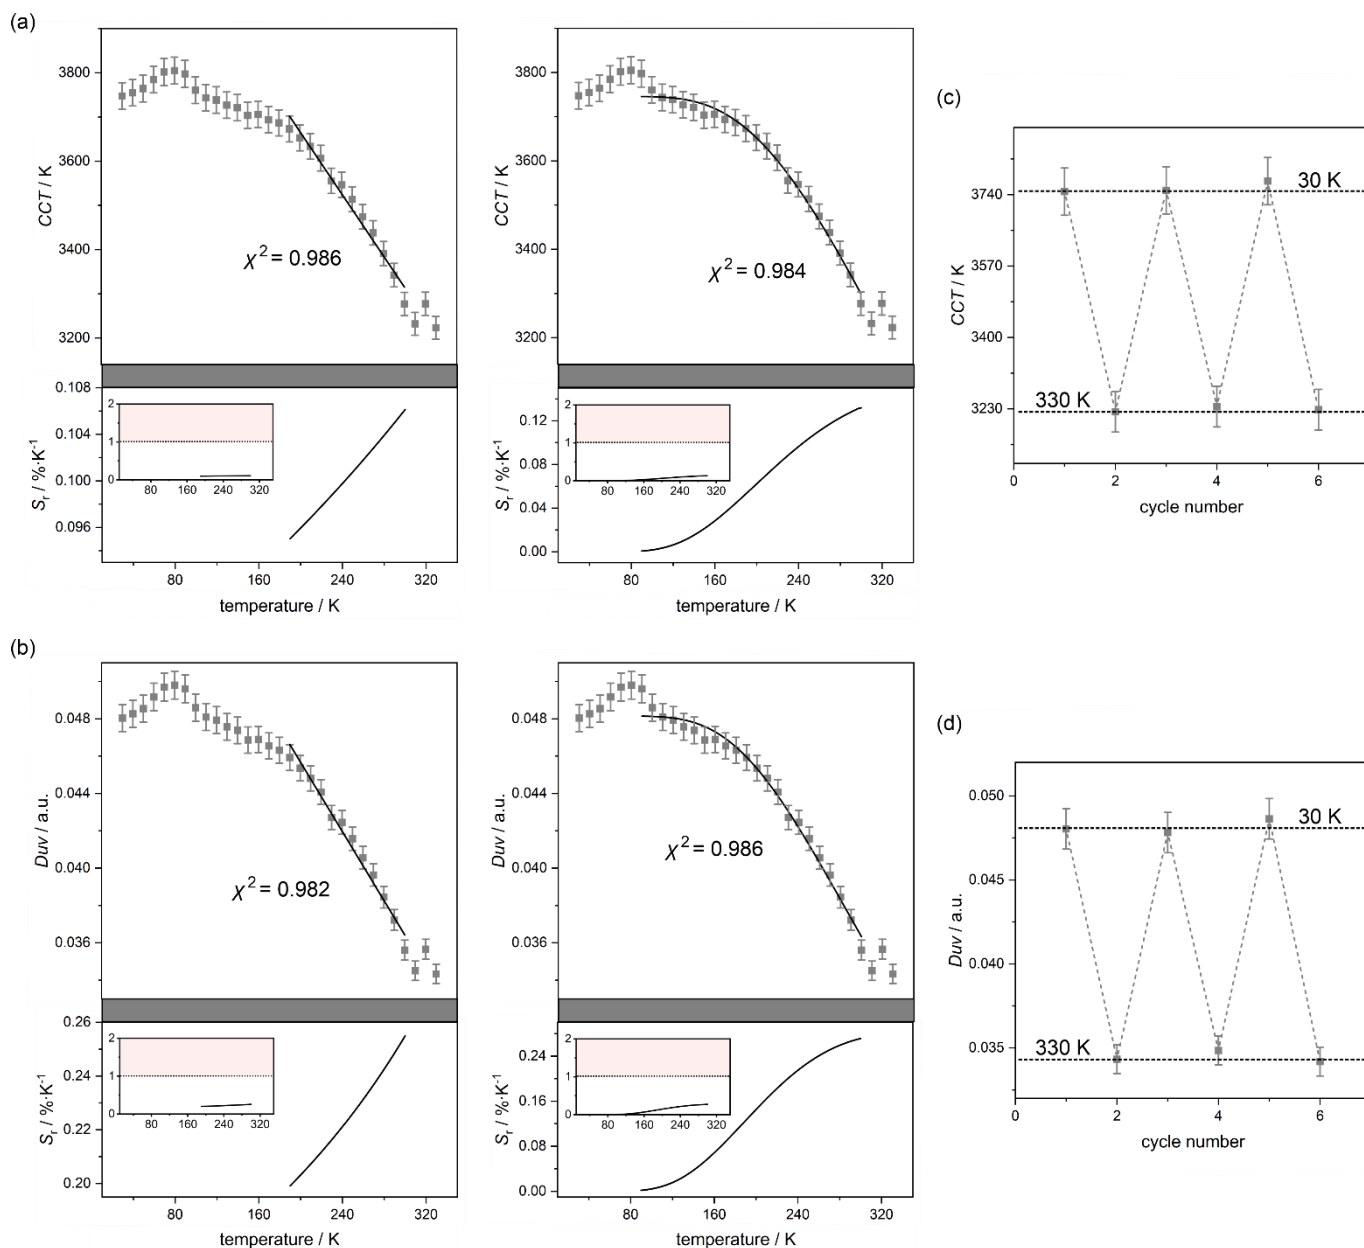

**Fig. S63** Temperature dependencies of the correlated color temperature (CCT, a) and  $D_{uv}$  value (b) calculated from the CIE 1931 chromaticity  $x$  and  $y$  parameters of the solid-state photoluminescent properties of  $\text{Re}_2\text{-bpbp}$  (see Fig. S32 and Table S42), shown with the best-fit curves (solid lines) obtained using the linear (left panel) and Mott-Seitz equations (right panel), together with the relative thermal sensitivity ( $S_r$ ) parameters (under the corresponding fits), and thermal repeatability of each of two discussed parameters along six consecutive measurements (c and d, corresponding to the a and b parts, respectively). The resulting best-fit parameters and employed equations are gathered in Tables S69 and S70.

**Table S66** Best-fit parameters for the linear and Mott-Seitz fittings of the temperature dependencies of the wavelength position of the emission maximum ( $\lambda_{\max}$ ) for **Re<sub>2</sub>-CN**, **Re<sub>2</sub>-bpy**, **Re<sub>2</sub>-bpac**, **Re<sub>2</sub>-bpee**, **Re<sub>2</sub>-bpb**, and **Re<sub>2</sub>-bpbp**, investigated within the indicated temperature ranges (see Fig. S48, S52, S54, S56, S60, and S62). Note that **Re<sub>2</sub>-en** and **Re<sub>2</sub>-bpen** do not appear here as the related temperature dependencies of the  $\lambda_{\max}$  values were too weak to be employed for optical thermometry.

| Material                   | Temp. range / K | Equation: $\lambda^{\max} = A+B \cdot T$                                       |                        |                | $\chi^2 / \%$ | $S_r^{\max} / \% \cdot K^{-1}$ | T for $S_r^{\max} / K$ |
|----------------------------|-----------------|--------------------------------------------------------------------------------|------------------------|----------------|---------------|--------------------------------|------------------------|
|                            |                 | A / nm                                                                         | B / nm·K <sup>-1</sup> |                |               |                                |                        |
| <b>Re<sub>2</sub>-CN</b>   | 190–330         | 557.5(1.90)                                                                    | 0.192(0.007)           |                | 98.2          | 0.03                           | 190                    |
| <b>Re<sub>2</sub>-bpy</b>  | 30–240          | 582.0(0.31)                                                                    | 0.039(0.002)           |                | 97.2          | <0.01                          | –                      |
|                            | 240–330         | 481.7(5.67)                                                                    | 0.454(0.020)           |                | 98.8          | 0.08                           | 240                    |
| <b>Re<sub>2</sub>-bpac</b> | 30–250          | 575.7(1.51)                                                                    | 0.244(0.010)           |                | 96.9          | 0.04                           | 30                     |
| <b>Re<sub>2</sub>-bpee</b> | 150–330         | 593.2(1.34)                                                                    | 0.151(0.005)           |                | 98.9          | 0.02                           | 150                    |
| <b>Re<sub>2</sub>-bpb</b>  | 60–330          | 590.3(0.95)                                                                    | 0.186(0.004)           |                | 98.5          | 0.03                           | 60                     |
| <b>Re<sub>2</sub>-bpbp</b> | 30–240          | 553.2(0.13)                                                                    | 0.020(0.001)           |                | 98.2          | <0.01                          | –                      |
|                            | 230–320         | 534.7(2.45)                                                                    | 0.097(0.009)           |                | 97.3          | 0.02                           | 230                    |
| Material                   | Temp. range / K | Mott-Seitz equation: <sup>S32</sup> $\lambda^{\max} = A/(1+B \cdot \exp(C/T))$ |                        |                | $\chi^2 / \%$ | $S_r^{\max} / \% \cdot K^{-1}$ | T for $S_r^{\max} / K$ |
|                            |                 | A / nm                                                                         | B                      | C / K          |               |                                |                        |
| <b>Re<sub>2</sub>-CN</b>   | 110–330         | 593.7(0.24)                                                                    | -1.0(0.07)             | -1021.3(31.67) | 99.7          | 0.05                           | 330                    |
| <b>Re<sub>2</sub>-bpy</b>  | 30–330          | 585.9(0.28)                                                                    | -6.4(1.01)             | -1461.9(49.00) | 99.4          | 0.11                           | 330                    |
| <b>Re<sub>2</sub>-bpac</b> | 30–330          | 590.9(1.69)                                                                    | -0.4(0.03)             | -389.4(28.67)  | 97.9          | 0.06                           | 210                    |
| <b>Re<sub>2</sub>-bpee</b> | 30–330          | 615.2(0.48)                                                                    | -0.3(0.01)             | -605.1(43.23)  | 97.7          | 0.03                           | 310                    |
| <b>Re<sub>2</sub>-bpb</b>  | 30–330          | 601.9(0.59)                                                                    | -0.2(0.01)             | -281.2(11.15)  | 99.5          | 0.03                           | 145                    |
| <b>Re<sub>2</sub>-bpbp</b> | 60–330          | 555.5(0.17)                                                                    | -1.3(0.37)             | -1337.6(52.12) | 98.2          | 0.03                           | 330                    |



**Table S67** Best-fit parameters for the linear and Mott-Seitz fittings of the temperature dependencies of the full width at half maximum of emission band (*FWHM*) for **Re<sub>2</sub>-CN**, **Re<sub>2</sub>-en**, **Re<sub>2</sub>-bpy**, **Re<sub>2</sub>-bpb**, and **Re<sub>2</sub>-bpbp**, investigated within the indicated temperature ranges (see Fig. S48, S50, S52, S58, S60, and S62). Note that **Re<sub>2</sub>-bpac** and **Re<sub>2</sub>-bpee** do not appear here as the related temperature dependencies of the *FWHM* values were too weak to be employed for optical thermometry.

| Material                   | Temp. range / K | Equation: $FWHM = A+B \cdot T$                                       |                       |               | $\chi^2 / \%$ | $S_r^{\max} / \% \cdot K^{-1}$ | $T$ for $S_r^{\max} / K$ |
|----------------------------|-----------------|----------------------------------------------------------------------|-----------------------|---------------|---------------|--------------------------------|--------------------------|
|                            |                 | $A / nm$                                                             | $B / nm \cdot K^{-1}$ |               |               |                                |                          |
| <b>Re<sub>2</sub>-CN</b>   | 30–330          | 105.8(0.49)                                                          | 0.090(0.002)          |               | 97.9          | 0.08                           | 30                       |
| <b>Re<sub>2</sub>-en</b>   | 90–290          | 108.4(0.20)                                                          | –0.029(0.001)         |               | 97.8          | 0.03                           | 290                      |
| <b>Re<sub>2</sub>-bpy</b>  | 120–330         | 58.9(1.18)                                                           | 0.283(0.005)          |               | 99.5          | 0.30                           | 120                      |
| <b>Re<sub>2</sub>-bpen</b> | 60–320          | 86.3(0.27)                                                           | 0.036(0.001)          |               | 96.8          | 0.04                           | 60                       |
| <b>Re<sub>2</sub>-bpb</b>  | 60–330          | 63.3(0.87)                                                           | 0.223(0.004)          |               | 99.4          | 0.29                           | 60                       |
| <b>Re<sub>2</sub>-bpbp</b> | 160–330         | 71.4(0.68)                                                           | 0.123(0.003)          |               | 99.4          | 0.14                           | 160                      |
| Material                   | Temp. range / K | Mott-Seitz equation: <sup>S32</sup> $FWHM = A/(1+B \cdot \exp(C/T))$ |                       |               | $\chi^2 / \%$ | $S_r^{\max} / \% \cdot K^{-1}$ | $T$ for $S_r^{\max} / K$ |
|                            |                 | $A / nm$                                                             | $B$                   | $C / K$       |               |                                |                          |
| <b>Re<sub>2</sub>-CN</b>   | 90–330          | 115.5(0.43)                                                          | –0.8(0.07)            | –518.0(33.8)  | 99.3          | 0.09                           | 300                      |
| <b>Re<sub>2</sub>-en</b>   | 80–280          | 105.3(0.08)                                                          | 0.4(0.03)             | –534.3(23.56) | 99.5          | 0.04                           | 260                      |
| <b>Re<sub>2</sub>-bpy</b>  | 30–330          | 86.6(0.31)                                                           | –1.1(0.02)            | –299.2(5.60)  | 99.9          | 0.24                           | 200                      |
| <b>Re<sub>2</sub>-bpen</b> | 50–330          | 87.5(0.24)                                                           | –0.2(0.01)            | –203.8(13.02) | 99.2          | 0.05                           | 110                      |
| <b>Re<sub>2</sub>-bpb</b>  | 30–330          | 75.6(0.89)                                                           | –0.8(0.02)            | –192.2(10.4)  | 99.4          | 0.25                           | 110                      |
| <b>Re<sub>2</sub>-bpbp</b> | 90–330          | 88.4(0.18)                                                           | –1.0(0.03)            | –518.5(12.92) | 99.9          | 0.13                           | 330                      |

**Table S68** Best-fit parameters for the linear and Mott-Seitz fittings of the temperature dependencies of the integrated emission intensity (peak area,  $I$ ) for **Re<sub>2</sub>-CN**, **Re<sub>2</sub>-bpy**, **Re<sub>2</sub>-bpee**, **Re<sub>2</sub>-bpen**, **Re<sub>2</sub>-bpb**, and **Re<sub>2</sub>-bpbp**, investigated within the indicated temperature ranges (see Fig. S48, S52, S56, S58, S60, and S62). Note that **Re<sub>2</sub>-en** and **Re<sub>2</sub>-bpac** do not appear here as the related temperature dependencies of the  $I$  values were too weak to be employed for optical thermometry.

| Material                   | Temp. range / K | Equation: $I = A + B \cdot T$                                         |              |               | $\chi^2 / \%$ | $S_r^{\max} / \% \cdot K^{-1}$ | $T$ for $S_r^{\max} / K$ |
|----------------------------|-----------------|-----------------------------------------------------------------------|--------------|---------------|---------------|--------------------------------|--------------------------|
|                            |                 | $A$                                                                   | $B / K^{-1}$ |               |               |                                |                          |
| <b>Re<sub>2</sub>-CN</b>   | 30–330          | 119.4(0.42)                                                           | 0.076(0.002) |               | 98.2          | 0.06                           | 30                       |
| <b>Re<sub>2</sub>-bpy</b>  | 90–330          | 74.9(0.55)                                                            | 0.273(0.003) |               | 99.8          | 0.27                           | 90                       |
| <b>Re<sub>2</sub>-bpee</b> | 90–180          | 26.1(1.84)                                                            | 0.651(0.035) |               | 98.1          | 0.77                           | 90                       |
| <b>Re<sub>2</sub>-bpen</b> | 70–320          | 89.2(0.29)                                                            | 0.054(0.001) |               | 98.2          | 0.06                           | 70                       |
| <b>Re<sub>2</sub>-bpb</b>  | 60–330          | 70.9(1.05)                                                            | 0.240(0.005) |               | 98.9          | 0.28                           | 60                       |
| <b>Re<sub>2</sub>-bpbp</b> | 150–330         | 77.0(0.76)                                                            | 0.145(0.003) |               | 99.3          | 0.15                           | 150                      |
| Material                   | Temp. range / K | Mott-Seitz equation: <sup>S32</sup> $I = A / (1 + B \cdot \exp(C/T))$ |              |               | $\chi^2 / \%$ | $S_r^{\max} / \% \cdot K^{-1}$ | $T$ for $S_r^{\max} / K$ |
|                            |                 | $A$                                                                   | $B$          | $C / K$       |               |                                |                          |
| <b>Re<sub>2</sub>-CN</b>   | 50–330          | 125.2(0.26)                                                           | -0.5(0.01)   | -392.5(17.43) | 99.3          | 0.07                           | 210                      |
| <b>Re<sub>2</sub>-bpy</b>  | 30–330          | 96.5(0.25)                                                            | -0.9(0.01)   | -259.3(3.67)  | 99.9          | 0.22                           | 160                      |
| <b>Re<sub>2</sub>-bpen</b> | 30–330          | 93.0(0.24)                                                            | -0.3(0.01)   | -293.5(16.89) | 98.8          | 0.06                           | 150                      |
| <b>Re<sub>2</sub>-bpb</b>  | 30–330          | 82.6(1.03)                                                            | -0.8(0.02)   | -178.1(10.13) | 99.4          | 0.26                           | 100                      |
| <b>Re<sub>2</sub>-bpbp</b> | 90–330          | 95.4(0.24)                                                            | -1.0(0.03)   | -465.7(12.07) | 99.9          | 0.14                           | 290                      |

**Table S69** Best-fit parameters for the linear and Mott-Seitz fittings of the temperature dependencies of the correlated color temperature (*CCT*) for **Re<sub>2</sub>-CN**, **Re<sub>2</sub>-en**, **Re<sub>2</sub>-bpy**, **Re<sub>2</sub>-bpac**, **Re<sub>2</sub>-bpee**, **Re<sub>2</sub>-bpen**, **Re<sub>2</sub>-bpb**, and **Re<sub>2</sub>-bpbp**, investigated within the indicated temperature ranges (see Fig. S49, S51, S53, S55, S57, S59, S61, and S63).

| Material                   | Temp. range / K | Equation: $CCT = A+B \cdot T$                        |            |               | $\chi^2 / \%$ | $S_r^{\max} / \% \cdot K^{-1}$ | $T$ for $S_r^{\max} / K$ |
|----------------------------|-----------------|------------------------------------------------------|------------|---------------|---------------|--------------------------------|--------------------------|
|                            |                 | $A / K$                                              | $B$        |               |               |                                |                          |
| <b>Re<sub>2</sub>-CN</b>   | 40–130          | 2516.5(8.6)                                          | –2.3(0.1)  |               | 98.9          | 0.11                           | 130                      |
|                            | 220–270         | 2709.2(23.0)                                         | –2.4(0.1)  |               | 99.1          | 0.12                           | 280                      |
| <b>Re<sub>2</sub>-en</b>   | 60–150          | 3666.5(9.3)                                          | 4.0 (0.1)  |               | 99.6          | 0.10                           | 60                       |
| <b>Re<sub>2</sub>-bpy</b>  | 110–330         | 3041.1(20.6)                                         | –4.0(0.1)  |               | 99.1          | 0.23                           | 330                      |
| <b>Re<sub>2</sub>-bpac</b> | 210–330         | 278.6(46.5)                                          | 6.8(0.2)   |               | 99.2          | 0.40                           | 210                      |
| <b>Re<sub>2</sub>-bpee</b> | 100–180         | 2638.2(48.5)                                         | –5.2(0.3)  |               | 97.6          | 0.31                           | 180                      |
| <b>Re<sub>2</sub>-bpen</b> | 180–330         | 3787.6(10.2)                                         | 0.8(0.01)  |               | 97.5          | 0.02                           | 180                      |
| <b>Re<sub>2</sub>-bpb</b>  | 100–330         | 1171.1(9.8)                                          | 6.0(0.1)   |               | 99.9          | 0.34                           | 100                      |
| <b>Re<sub>2</sub>-bpbp</b> | 190–300         | 4370.5(±43.9)                                        | –3.5(±0.2) |               | 98.6          | 0.11                           | 300                      |
| Material                   | Temp. range / K | Mott-Seitz equation: $CCT = A/(1+B \cdot \exp(C/T))$ |            |               | $\chi^2 / \%$ | $S_r^{\max} / \% \cdot K^{-1}$ | $T$ for $S_r^{\max} / K$ |
|                            |                 | $A / K$                                              | $B$        | $C / K$       |               |                                |                          |
| <b>Re<sub>2</sub>-en</b>   | 60–280          | 3319.0(222.4)                                        | –0.3(0.01) | –39.5(13.4)   | 98.9          | 0.18                           | 60                       |
| <b>Re<sub>2</sub>-bpy</b>  | 30–330          | 2595.7(9.2)                                          | 3.0(0.3)   | –598.5(23.7)  | 99.2          | 0.21                           | 240                      |
| <b>Re<sub>2</sub>-bpac</b> | 140–330         | 1672.2(39.0)                                         | –4.8(0.8)  | –864.0(14.2)  | 97.3          | 0.42                           | 330                      |
| <b>Re<sub>2</sub>-bpee</b> | 30–160          | 2174.2(5.9)                                          | 7.4(1.6)   | –551.0(29.6)  | 99.2          | 0.41                           | 160                      |
| <b>Re<sub>2</sub>-bpb</b>  | 30–330          | 1693.1(11.1)                                         | –1.0(0.1)  | –259.4(7.4)   | 99.7          | 0.26                           | 165                      |
| <b>Re<sub>2</sub>-bpbp</b> | 90–300          | 3745.9(6.9)                                          | 3.8(0.8)   | –1000.0(60.3) | 98.4          | 0.13                           | 300                      |

**Table S70** Best-fit parameters for the linear and Mott-Seitz fittings of the temperature dependencies of the Delta  $u,v$  ( $Duv$ ) value for **Re<sub>2</sub>-CN**, **Re<sub>2</sub>-en**, **Re<sub>2</sub>-bpy**, **Re<sub>2</sub>-bpac**, **Re<sub>2</sub>-bpee**, **Re<sub>2</sub>-bpen**, **Re<sub>2</sub>-bpb**, and **Re<sub>2</sub>-bpbp**, investigated within the indicated temperature ranges (see Fig. S49, S51, S53, S55, S57, S59, S61, and S63).

| Material                   | Temp. range / K | Equation: $Duv = A+B \cdot T$                        |                      |               | $\chi^2 / \%$ | $S_r^{\max} / \% \cdot K^{-1}$ | T for $S_r^{\max} / K$ |
|----------------------------|-----------------|------------------------------------------------------|----------------------|---------------|---------------|--------------------------------|------------------------|
|                            |                 | A                                                    | $B / 10^{-5} K^{-1}$ |               |               |                                |                        |
| <b>Re<sub>2</sub>-CN</b>   | 40–130          | 0.019(0.0002)                                        | –4.368(0.192)        |               | 98.4          | 0.34                           | 130                    |
|                            | 210–330         | 0.019(0.0004)                                        | –3.258(0.148)        |               | 97.9          | 0.38                           | 330                    |
| <b>Re<sub>2</sub>-en</b>   | 60–150          | 0.044(0.0001)                                        | 9.604(0.180)         |               | 99.7          | 0.19                           | 60                     |
| <b>Re<sub>2</sub>-bpy</b>  | 70–290          | 0.025(0.0003)                                        | –5.654(0.117)        |               | 99.2          | 0.66                           | 290                    |
| <b>Re<sub>2</sub>-bpac</b> | 230–330         | –0.090(0.005)                                        | 54.941(1.822)        |               | 99.0          | 1.52                           | 230                    |
| <b>Re<sub>2</sub>-bpee</b> | 170–320         | –0.024(0.001)                                        | 26.178(1.240)        |               | 98.9          | 2.29                           | 170                    |
| <b>Re<sub>2</sub>-bpen</b> | 180–330         | 0.050(0.0002)                                        | 1.565(0.072)         |               | 98.2          | 0.03                           | 180                    |
| <b>Re<sub>2</sub>-bpb</b>  | 100–330         | –0.018(0.002)                                        | 46.702(0.973)        |               | 99.1          | 1.65                           | 100                    |
| <b>Re<sub>2</sub>-bpbp</b> | 190–300         | 0.064(±0.001)                                        | –9.285(±0.405)       |               | 98.2          | 0.25                           | 300                    |
| Material                   | Temp. range / K | Mott-Seitz equation: $Duv = A/(1+B \cdot \exp(C/T))$ |                      |               | $\chi^2 / \%$ | $S_r^{\max} / \% \cdot K^{-1}$ | T for $S_r^{\max} / K$ |
|                            |                 | A                                                    | B                    | C / K         |               |                                |                        |
| <b>Re<sub>2</sub>-en</b>   | 80–270          | 1.213 (0.03)                                         | 17.2(1.2)            | 21.80353(1.2) | 99.3          | 0.33                           | 80                     |
| <b>Re<sub>2</sub>-bpy</b>  | 60–290          | 0.020(0.001)                                         | 7.2(0.91)            | –534.4(23.1)  | 98.1          | 0.45                           | 190                    |
| <b>Re<sub>2</sub>-bpac</b> | 120–320         | 416718.3(1.1)                                        | 554346.3(1.5)        | 711.5(42.2)   | 95.8          | 4.96                           | 120                    |
| <b>Re<sub>2</sub>-bpee</b> | 170–320         | 2.0(0.1)                                             | 0.717(0.03)          | 674.0(12.0)   | 98.9          | 2.02                           | 170                    |
| <b>Re<sub>2</sub>-bpb</b>  | 110–320         | 26580.6(6.6)                                         | 107694.4(2.6)        | 227.7(10.2)   | 99.7          | 1.88                           | 110                    |
| <b>Re<sub>2</sub>-bpbp</b> | 90–300          | 0.048(0.0002)                                        | 8.9(0.8)             | –993.98(63.8) | 98.6          | 0.27                           | 300                    |

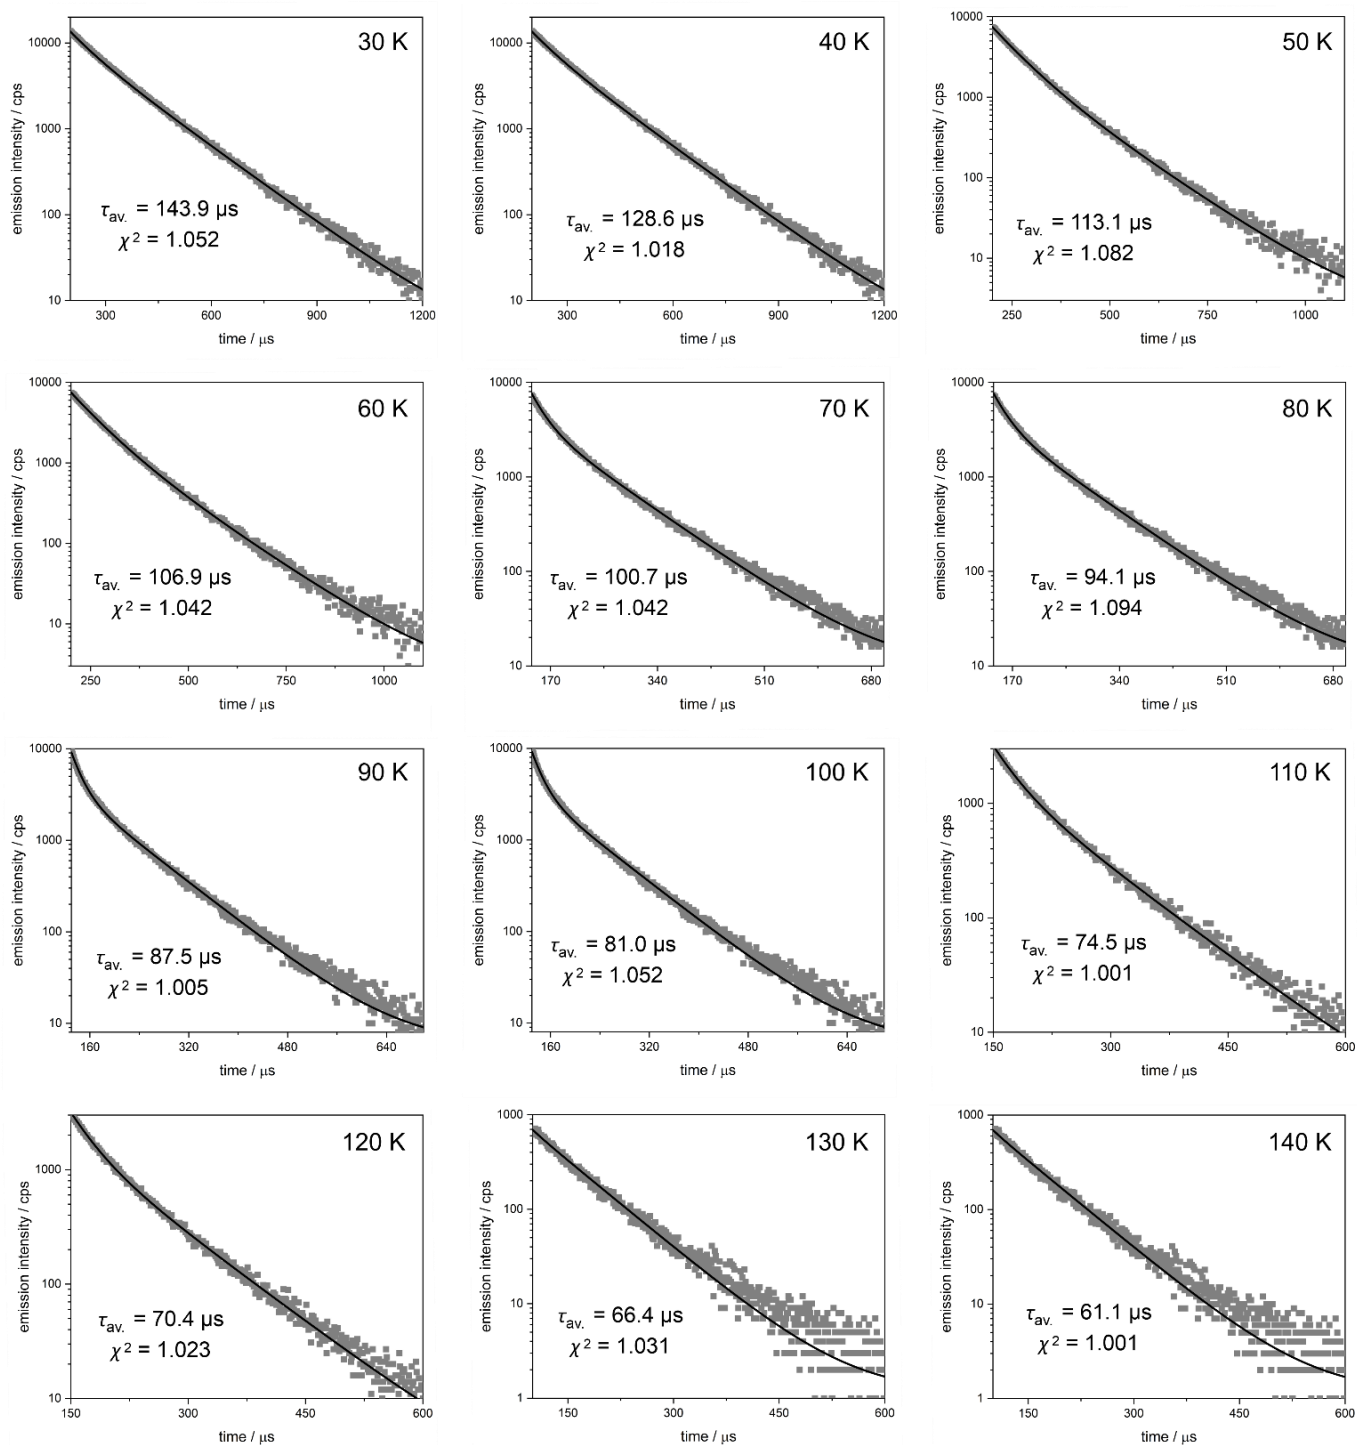

**Fig. S64** (part 1 of 2) Temperature-variable emission decay profiles for **Re<sub>2</sub>-CN** under  $\lambda_{ex} = 430$  nm and  $\lambda_{em} = 595$  nm, collected for the indicated temperatures from the 30–230 K range (in this part, the region of 30–140 K is shown). The double exponential fitting was applied for each temperature; the related best-fit curve is illustrated by a solid line. The best-fit parameters are roughly presented on the graphs while the detailed values are gathered in Table S71.

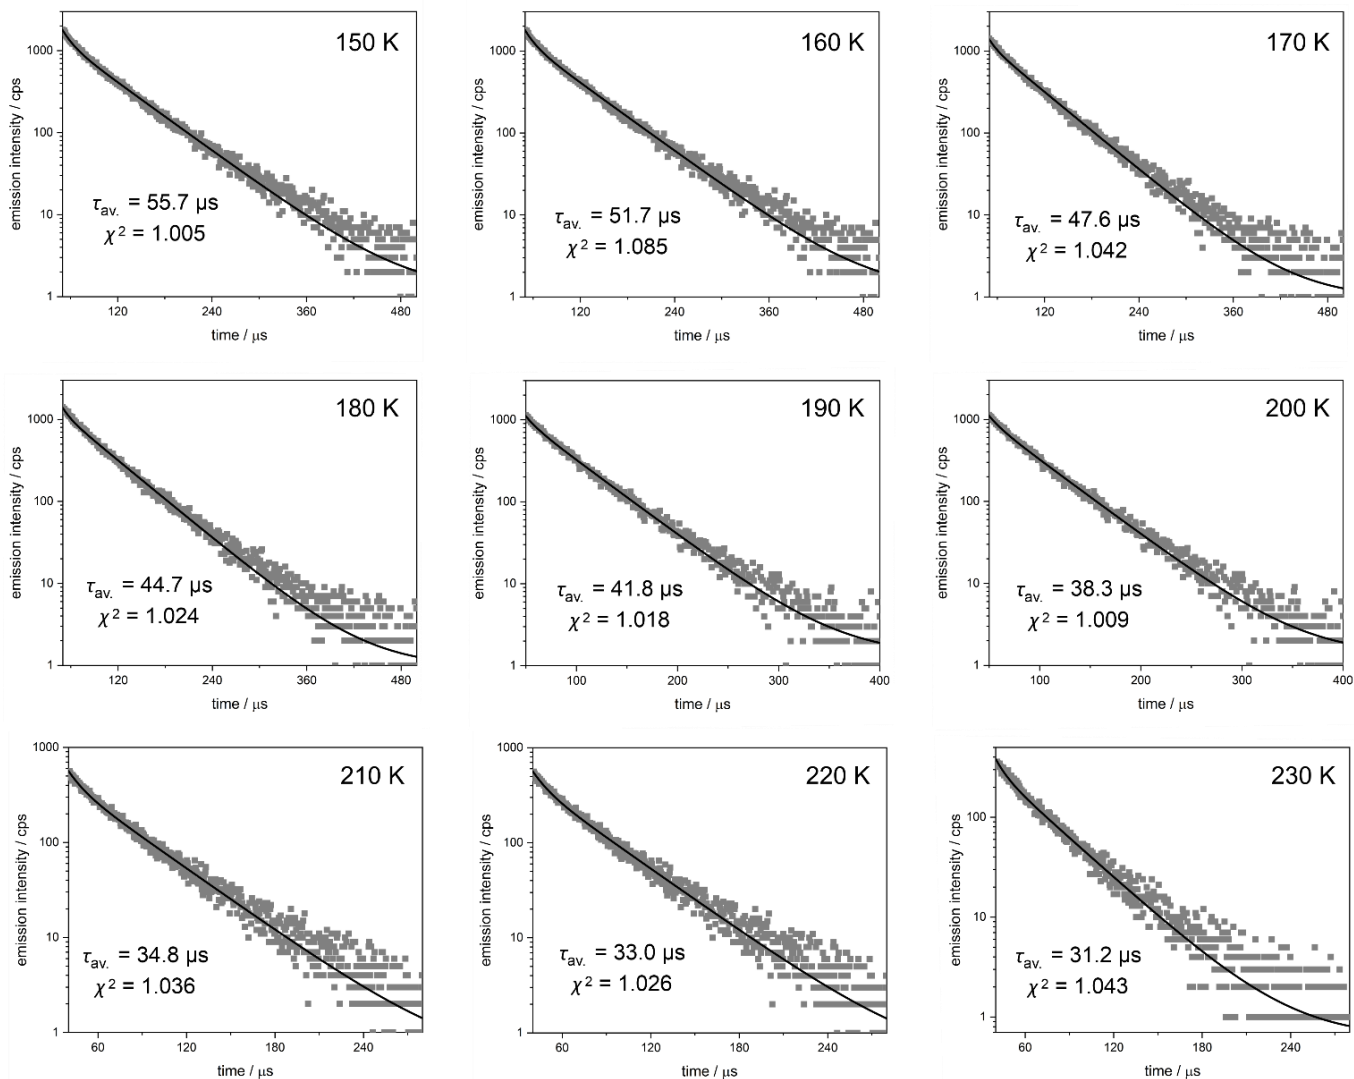

**Fig. S64** (part 2 of 2) Temperature-variable emission decay profiles for **Re<sub>2</sub>-CN** under  $\lambda_{ex} = 430$  nm and  $\lambda_{em} = 595$  nm, collected for the indicated temperatures from the 30–230 K range (in this part, the region of 150–230 K is shown). The double exponential fitting was applied for each temperature; the related best-fit curve is illustrated by a solid line. The best-fit parameters are roughly presented on the graphs while the detailed values are gathered in Table S71.

**Table S71** Best-fit parameters for the emission decay profiles of **Re<sub>2</sub>-CN** to the double exponential decay function (represented by the  $\tau_1$  and  $\tau_2$  values of emission lifetime components, with the respective contributions given in the brackets next to the lifetime values), and the calculated weighted-average emission lifetime ( $\tau_{av.}$ ), all presented for the 30–230 K temperature range (see Fig. S64 for the respective emission decay profiles).

| parameter                    | Re <sub>2</sub> -CN |               |               |               |               |               |
|------------------------------|---------------------|---------------|---------------|---------------|---------------|---------------|
|                              | 30 K                | 40 K          | 50 K          | 60 K          | 70 K          | 80 K          |
| $\tau_1$ (%) / $\mu\text{s}$ | 98.4 (42.79)        | 85.0 (41.38)  | 71.6 (39.98)  | 64.4 (37.23)  | 57.1 (34.48)  | 52.6 (33.39)  |
| $\tau_2$ (%) / $\mu\text{s}$ | 177.9 (57.21)       | 159.4 (58.62) | 140.8 (60.02) | 132.2 (62.77) | 123.6 (65.52) | 115.0 (66.61) |
| $\tau_{av.}$ / $\mu\text{s}$ | 143.9               | 128.6         | 113.1         | 106.9         | 100.7         | 94.1          |
| $\chi^2$                     | 1.052               | 1.018         | 1.082         | 1.042         | 1.038         | 1.094         |
|                              | 90 K                | 100 K         | 110 K         | 120 K         | 130 K         | 140 K         |
| $\tau_1$ (%) / $\mu\text{s}$ | 48.1 (32.29)        | 42.5 (30.55)  | 36.9 (28.81)  | 33.8 (27.64)  | 30.7 (26.47)  | 24.5 (23.17)  |
| $\tau_2$ (%) / $\mu\text{s}$ | 106.3 (67.71)       | 98.0 (69.45)  | 89.7 (71.19)  | 84.4 (72.36)  | 79.2 (73.53)  | 72.1 (76.83)  |
| $\tau_{av.}$ / $\mu\text{s}$ | 87.5                | 81.0          | 74.5          | 70.4          | 66.4          | 61.1          |
| $\chi^2$                     | 1.005               | 1.052         | 1.001         | 1.023         | 1.031         | 1.001         |
|                              | 150 K               | 160 K         | 170 K         | 180 K         | 190 K         | 200 K         |
| $\tau_1$ (%) / $\mu\text{s}$ | 18.3 (19.87)        | 14.6 (18.94)  | 11.0 (18.00)  | 10.6 (16.84)  | 10.1 (15.68)  | 9.4 (15.28)   |
| $\tau_2$ (%) / $\mu\text{s}$ | 65.0 (80.13)        | 60.3 (81.06)  | 55.6 (82.00)  | 51.7 (83.16)  | 47.7 (84.32)  | 43.5 (84.72)  |
| $\tau_{av.}$ / $\mu\text{s}$ | 55.7                | 51.7          | 47.6          | 44.7          | 41.8          | 38.3          |
| $\chi^2$                     | 1.001               | 1.085         | 1.042         | 1.024         | 1.018         | 1.009         |
|                              | 210 K               | 220 K         | 230 K         | –             | –             | –             |
| $\tau_1$ (%) / $\mu\text{s}$ | 8.7 (14.89)         | 8.8 (14.07)   | 8.9 (13.24)   | –             | –             | –             |
| $\tau_2$ (%) / $\mu\text{s}$ | 39.4 (85.11)        | 37.0 (85.93)  | 34.6 (86.76)  | –             | –             | –             |
| $\tau_{av.}$ / $\mu\text{s}$ | 34.8                | 33.0          | 31.2          | –             | –             | –             |
| $\chi^2$                     | 1.036               | 1.026         | 1.043         | –             | –             | –             |

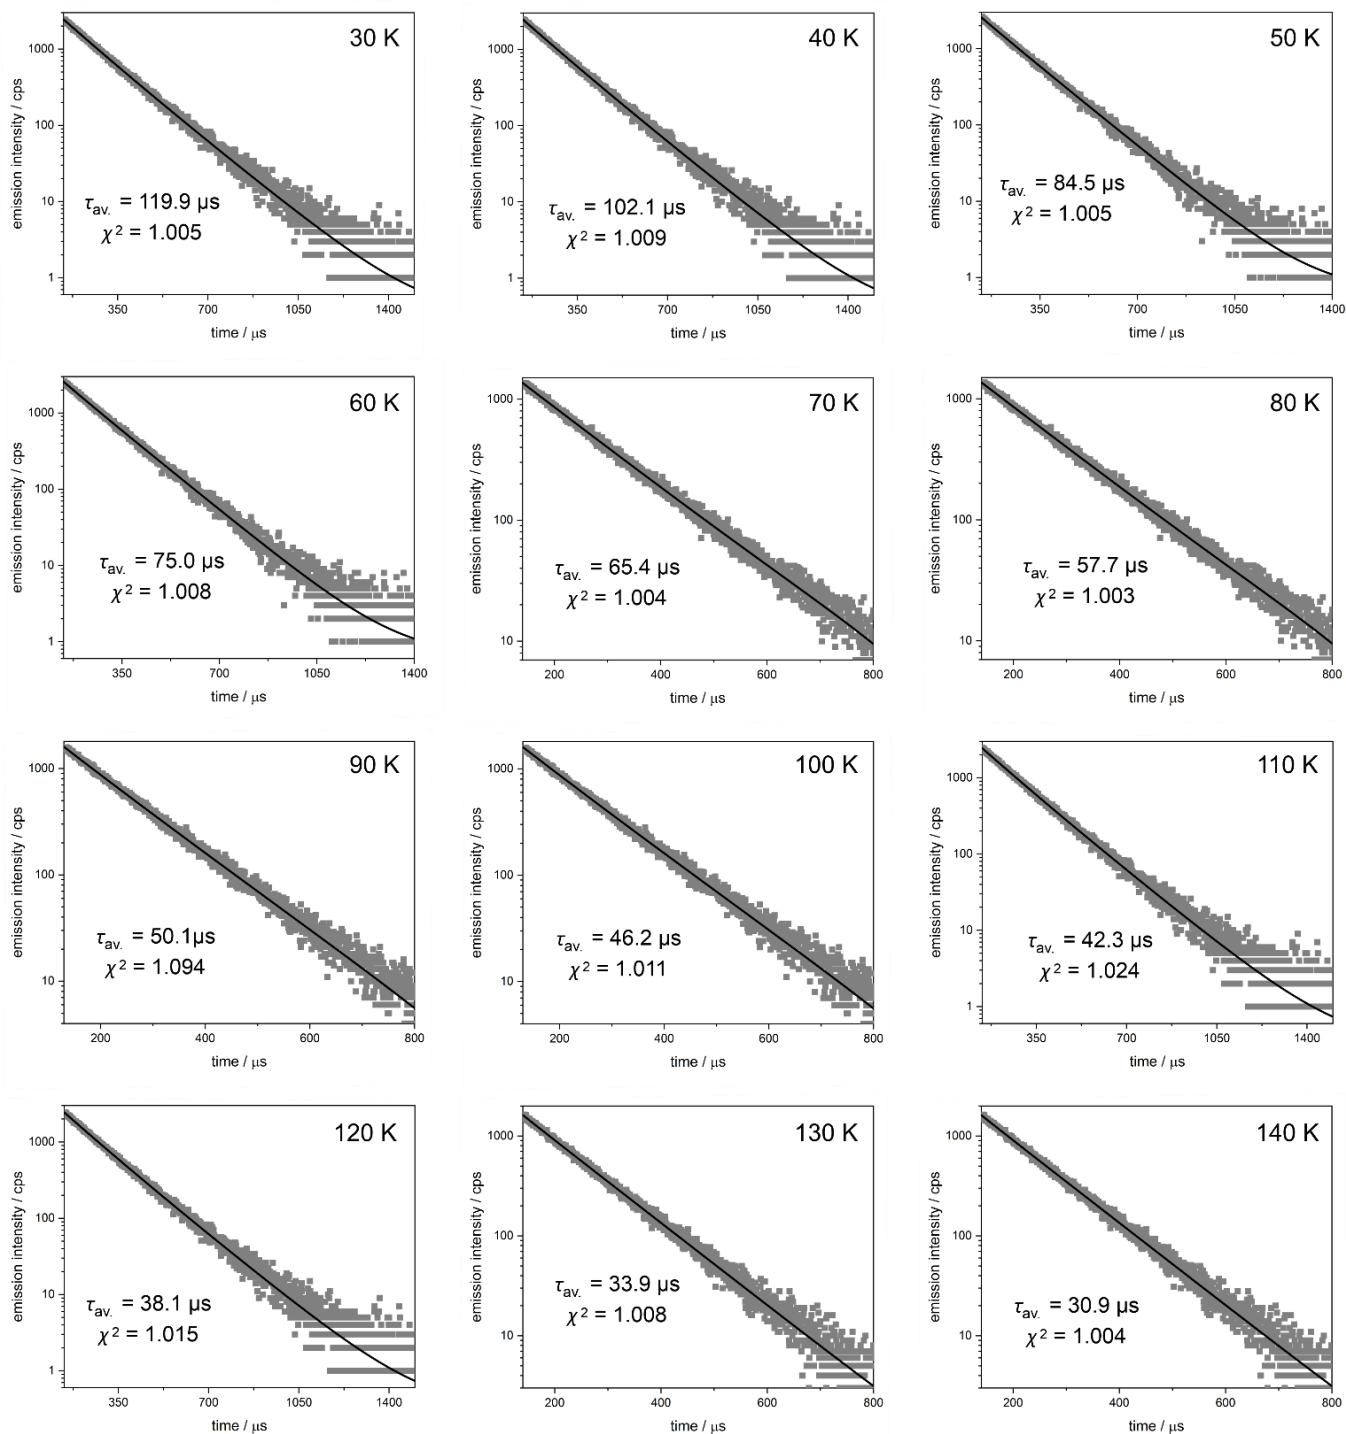

**Fig. S65** (part 1 of 3) Temperature-variable emission decay profiles for **Re<sub>2</sub>-en** under  $\lambda_{ex} = 430$  nm and  $\lambda_{em} = 542$  nm, collected for the indicated temperatures from the 30–330 K range (in this part, the region of 30–140 K is shown). The double exponential fitting was applied for each temperature; the related best-fit curve is illustrated by a solid line. The best-fit parameters are roughly presented on the graphs while the detailed values are gathered in Table S72.



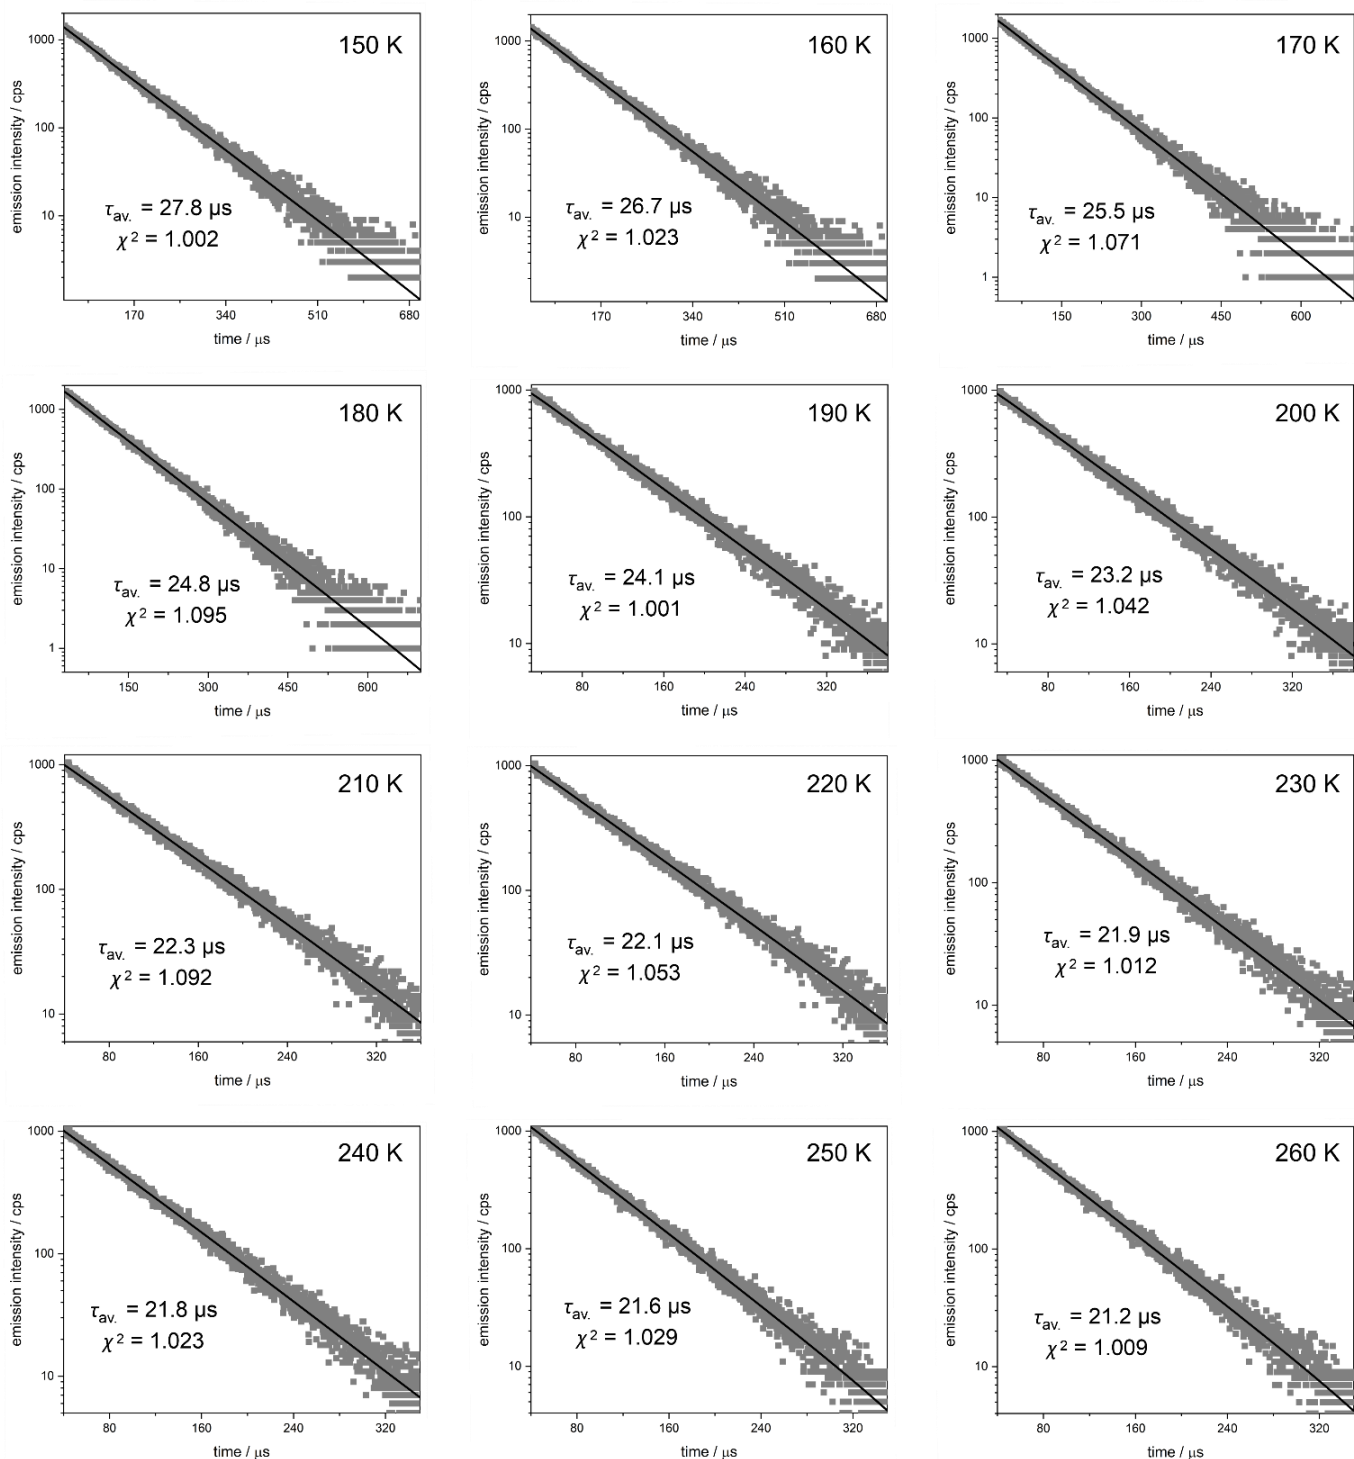

**Fig. S65** (part 2 of 3) Temperature-variable emission decay profiles for **Re<sub>2</sub>-en** under  $\lambda_{ex} = 430$  nm and  $\lambda_{em} = 542$  nm, collected for the indicated temperatures from the 30–330 K range (in this part, the region of 150–260 K is shown). The double exponential fitting was applied for each temperature; the related best-fit curve is illustrated by a solid line. The best-fit parameters are roughly presented on the graphs while the detailed values are gathered in Table S72.

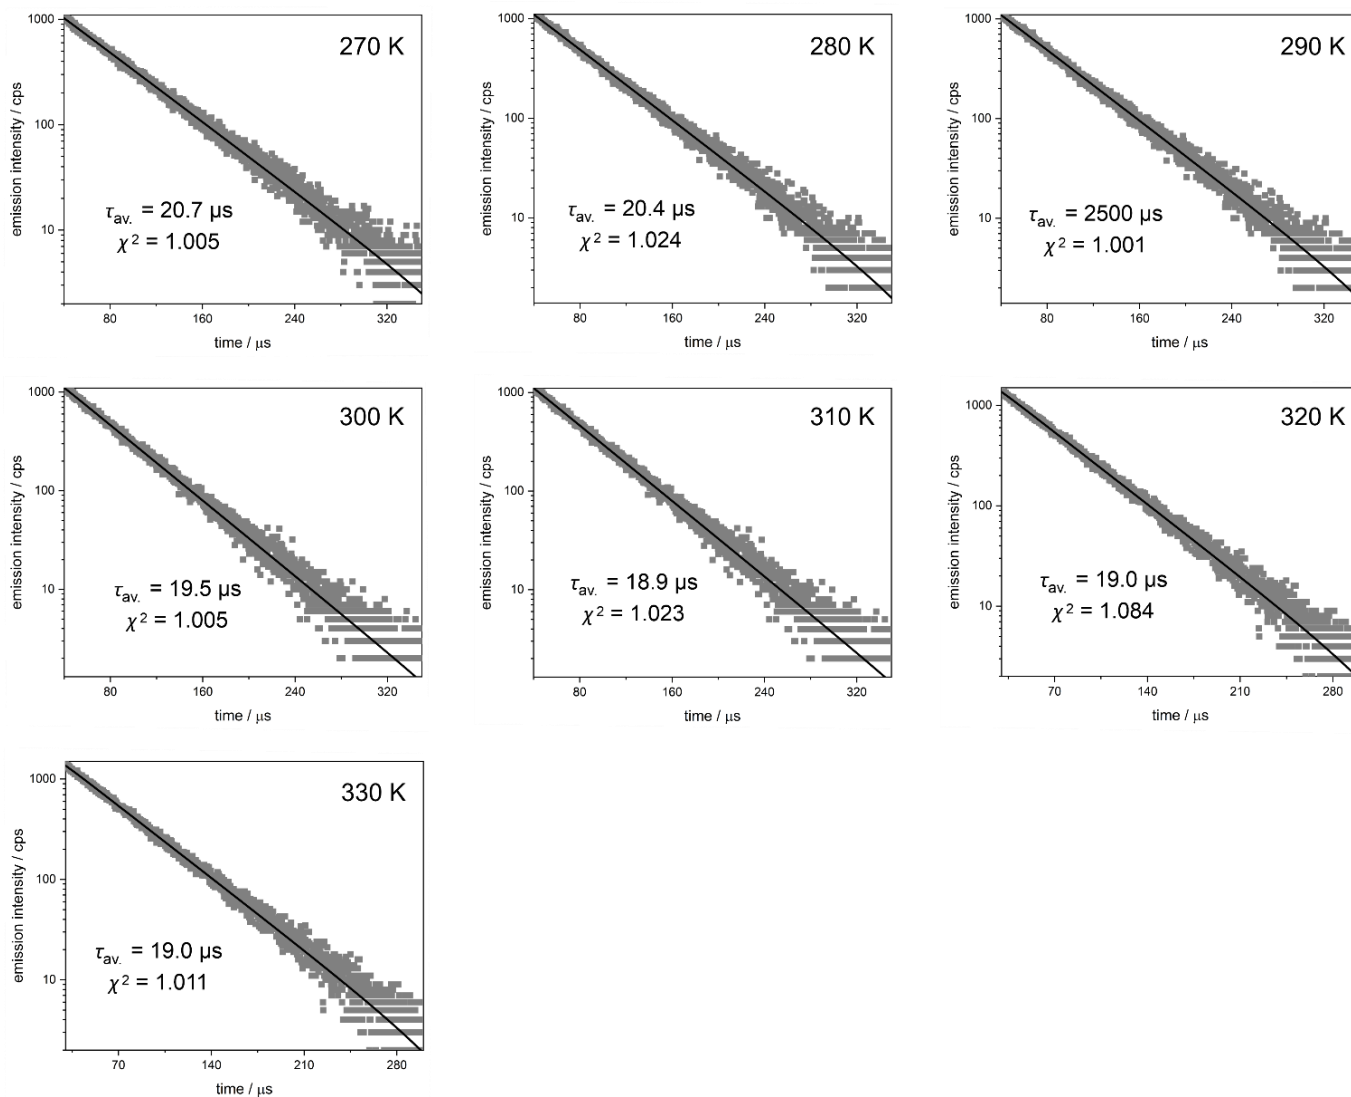

**Fig. S65** (part 3 of 3) Temperature-variable emission decay profiles for **Re<sub>2</sub>-en** under  $\lambda_{ex} = 430$  nm and  $\lambda_{em} = 542$  nm, collected for the indicated temperatures from the 30–330 K range (in this part, the region of 270–330 K is shown). The double exponential fitting was applied for each temperature; the related best-fit curve is illustrated by a solid line. The best-fit parameters are roughly presented on the graphs while the detailed values are gathered in Table S72.

**Table S72** Best-fit parameters for the emission decay profiles of **Re<sub>2</sub>-en** to the double exponential decay function (represented by the  $\tau_1$  and  $\tau_2$  values of emission lifetime components, with the respective contributions given in the brackets next to the lifetimes values), and the calculated weighted-average emission lifetime ( $\tau_{av.}$ ), all presented for the 30–330 K temperature range (see Fig. S65 for the respective emission decay profiles).

| parameter                    | Re <sub>2</sub> -en |               |               |               |               |               |
|------------------------------|---------------------|---------------|---------------|---------------|---------------|---------------|
|                              | 30 K                | 40 K          | 50 K          | 60 K          | 70 K          | 80 K          |
| $\tau_1$ (%) / $\mu\text{s}$ | 114.1 (88.02)       | 94.1 (86.82)  | 74.0 (85.62)  | 63.4 (84.80)  | 52.8 (83.98)  | 43.9 (82.79)  |
| $\tau_2$ (%) / $\mu\text{s}$ | 162.7 (11.98)       | 154.9 (13.18) | 147.0 (14.38) | 139.3 (15.20) | 131.5 (16.02) | 124.5 (17.21) |
| $\tau_{av.}$ / $\mu\text{s}$ | 119.9               | 102.1         | 84.5          | 75.0          | 65.4          | 57.7          |
| $\chi^2$                     | 1.005               | 1.009         | 1.005         | 1.008         | 1.004         | 1.003         |
|                              | 90 K                | 100 K         | 110 K         | 120 K         | 130 K         | 140 K         |
| $\tau_1$ (%) / $\mu\text{s}$ | 34.9 (81.6)         | 29.7 (79.71)  | 24.4 (77.82)  | 19.4 (76.57)  | 14.4 (75.31)  | 11.5 (74.83)  |
| $\tau_2$ (%) / $\mu\text{s}$ | 117.4 (18.4)        | 111.3 (20.29) | 105.2 (22.18) | 99.2 (23.43)  | 93.2 (24.69)  | 88.5 (25.17)  |
| $\tau_{av.}$ / $\mu\text{s}$ | 50.1                | 46.2          | 42.3          | 38.1          | 33.9          | 30.9          |
| $\chi^2$                     | 1.094               | 1.011         | 1.024         | 1.015         | 1.008         | 1.014         |
|                              | 150 K               | 160 K         | 170 K         | 180 K         | 190 K         | 200 K         |
| $\tau_1$ (%) / $\mu\text{s}$ | 8.5 (74.35)         | 8.3 (74.04)   | 8.1 (73.73)   | 7.8 (73.17)   | 7.5 (72.61)   | 7.2 (72.30)   |
| $\tau_2$ (%) / $\mu\text{s}$ | 83.8 (25.65)        | 79.0 (25.96)  | 74.3 (26.27)  | 71.2 (26.83)  | 68.1 (27.39)  | 65.1 (27.70)  |
| $\tau_{av.}$ / $\mu\text{s}$ | 27.8                | 26.7          | 25.5          | 24.8          | 24.1          | 23.2          |
| $\chi^2$                     | 1.002               | 1.023         | 1.071         | 1.095         | 1.001         | 1.042         |
|                              | 210 K               | 220 K         | 230 K         | 240 K         | 250 K         | 260 K         |
| $\tau_1$ (%) / $\mu\text{s}$ | 6.8 (71.99)         | 6.8 (71.12)   | 6.9 (70.24)   | 7.3 (69.72)   | 7.8 (69.21)   | 7.9 (69.11)   |
| $\tau_2$ (%) / $\mu\text{s}$ | 62.1 (28.01)        | 59.7 (28.88)  | 57.4 (29.76)  | 55.1 (30.28)  | 52.8 (30.79)  | 51.0 (30.89)  |
| $\tau_{av.}$ / $\mu\text{s}$ | 22.3                | 22.1          | 21.9          | 21.8          | 21.6          | 21.2          |
| $\chi^2$                     | 1.092               | 1.053         | 1.012         | 1.023         | 1.029         | 1.009         |
|                              | 270 K               | 280 K         | 290 K         | 300 K         | 310 K         | 320 K         |
| $\tau_1$ (%) / $\mu\text{s}$ | 8.0 (69.01)         | 8.1 (68.64)   | 8.2 (68.27)   | 7.8 (67.74)   | 7.4 (67.21)   | 7.4 (65.66)   |
| $\tau_2$ (%) / $\mu\text{s}$ | 49.1 (30.99)        | 47.3 (31.36)  | 45.5 (31.73)  | 44.0 (32.26)  | 42.5 (32.79)  | 41.1 (34.34)  |
| $\tau_{av.}$ / $\mu\text{s}$ | 20.7                | 20.4          | 20.0          | 19.5          | 18.9          | 19.0          |
| $\chi^2$                     | 1.005               | 1.024         | 1.001         | 1.005         | 1.023         | 1.084         |
|                              | 330 K               | –             | –             | –             | –             | –             |
| $\tau_1$ (%) / $\mu\text{s}$ | 7.4 (64.11)         | –             | –             | –             | –             | –             |
| $\tau_2$ (%) / $\mu\text{s}$ | 39.8 (35.89)        | –             | –             | –             | –             | –             |
| $\tau_{av.}$ / $\mu\text{s}$ | 19.0                | –             | –             | –             | –             | –             |
| $\chi^2$                     | 1.011               | –             | –             | –             | –             | –             |

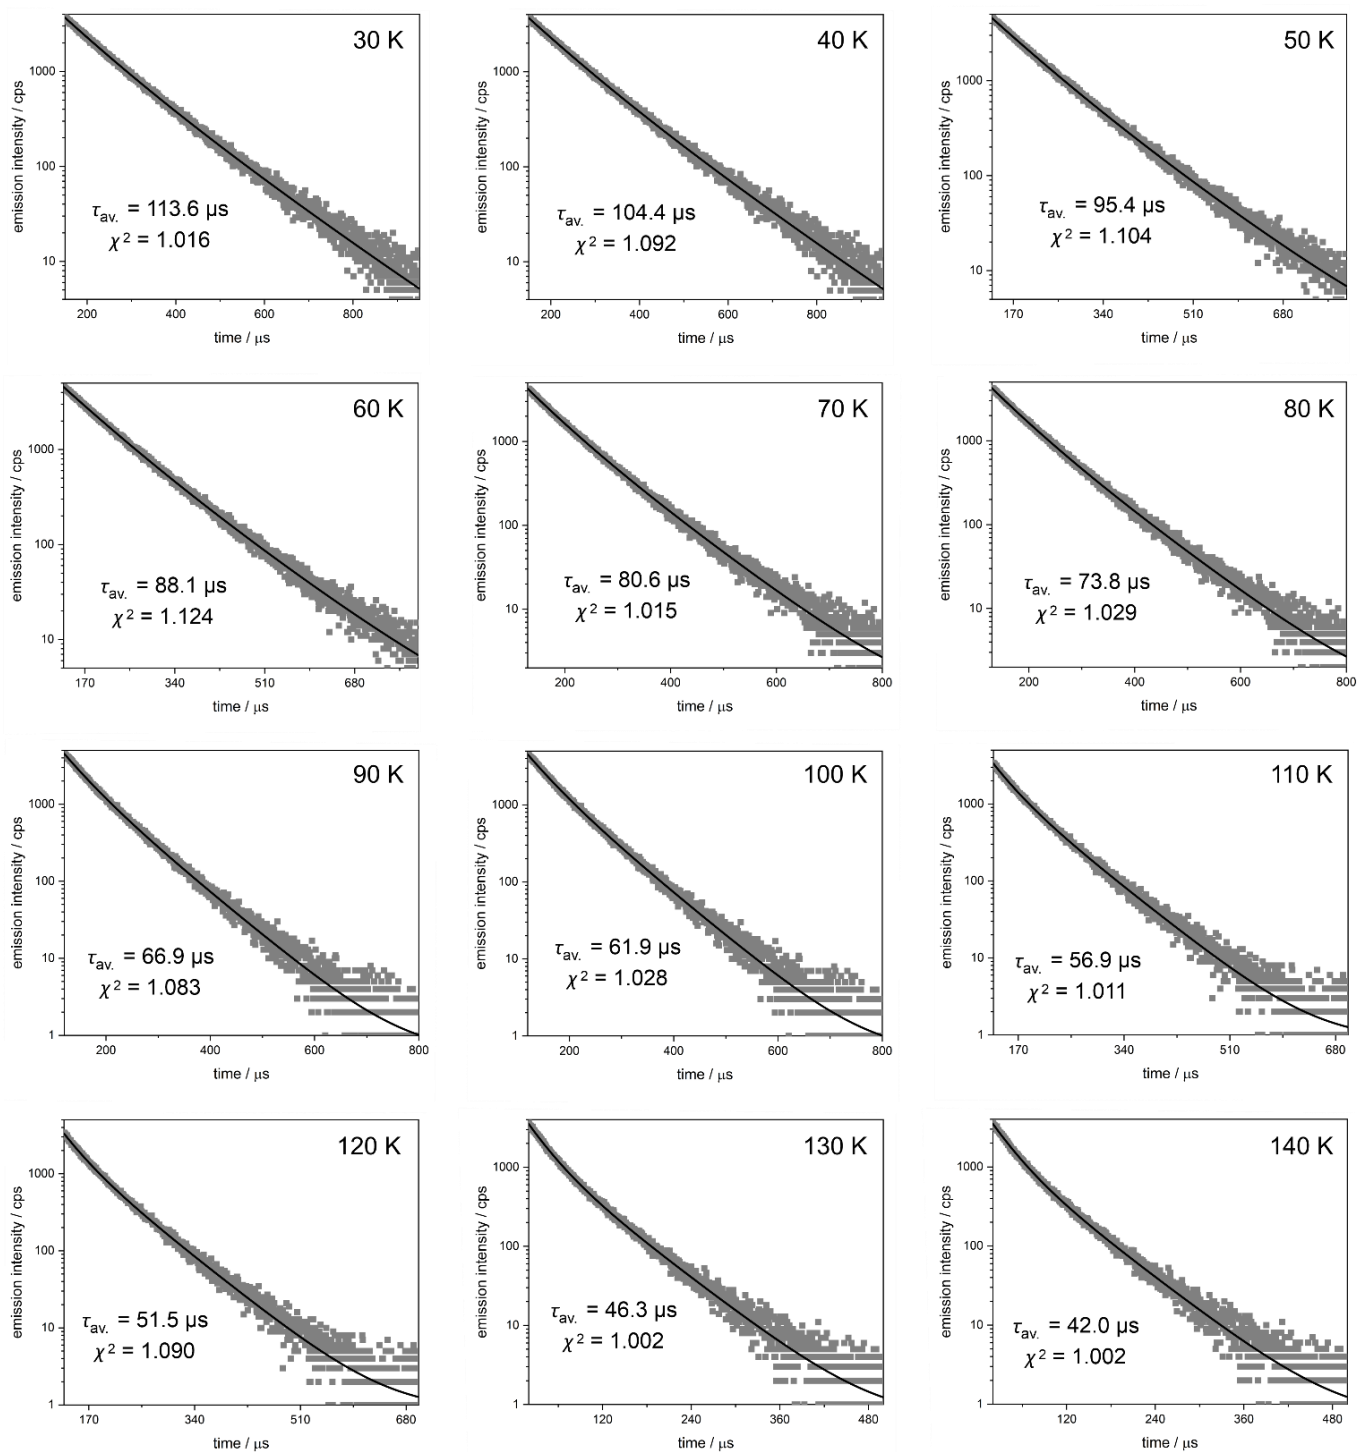

**Fig. S66** (part 1 of 3) Temperature-variable emission decay profiles for **Re<sub>2</sub>-bpy** under  $\lambda_{exc} = 430$  nm and  $\lambda_{em} = 584$  nm, collected for the indicated temperatures from the 30–330 K range (in this part, the region of 30–140 K is shown). The double exponential fitting was applied for each temperature; the related best-fit curve is illustrated by a solid line. The best-fit parameters are roughly presented on the graphs while the detailed values are gathered in Table S73.

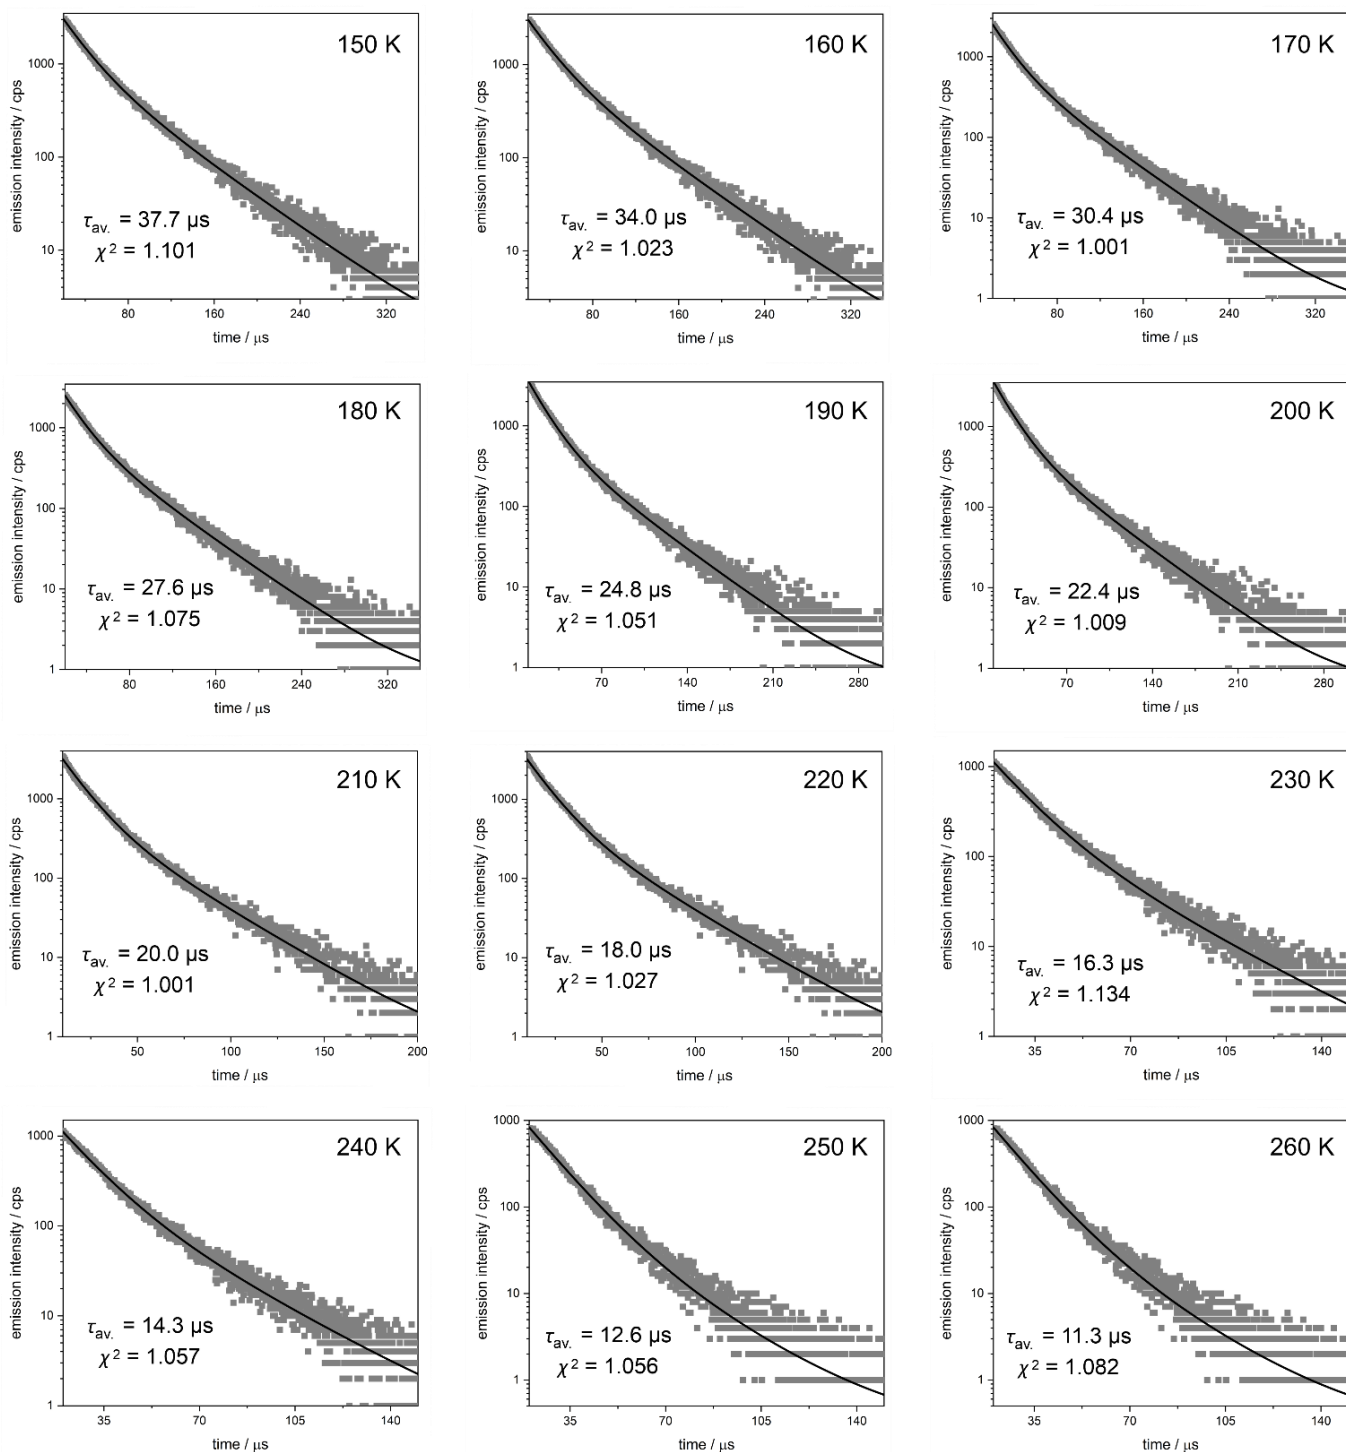

**Fig. S66** (part 2 of 3) Temperature-variable emission decay profiles for **Re<sub>2</sub>-bpy** under  $\lambda_{exc} = 430$  nm and  $\lambda_{em} = 584$  nm, collected for the indicated temperatures from the 30–330 K range (in this part, the region of 150–260 K is shown). The double exponential fitting was applied for each temperature; the related best-fit curve is illustrated by a solid line. The best-fit parameters are roughly presented on the graphs while the detailed values are gathered in Table S73.

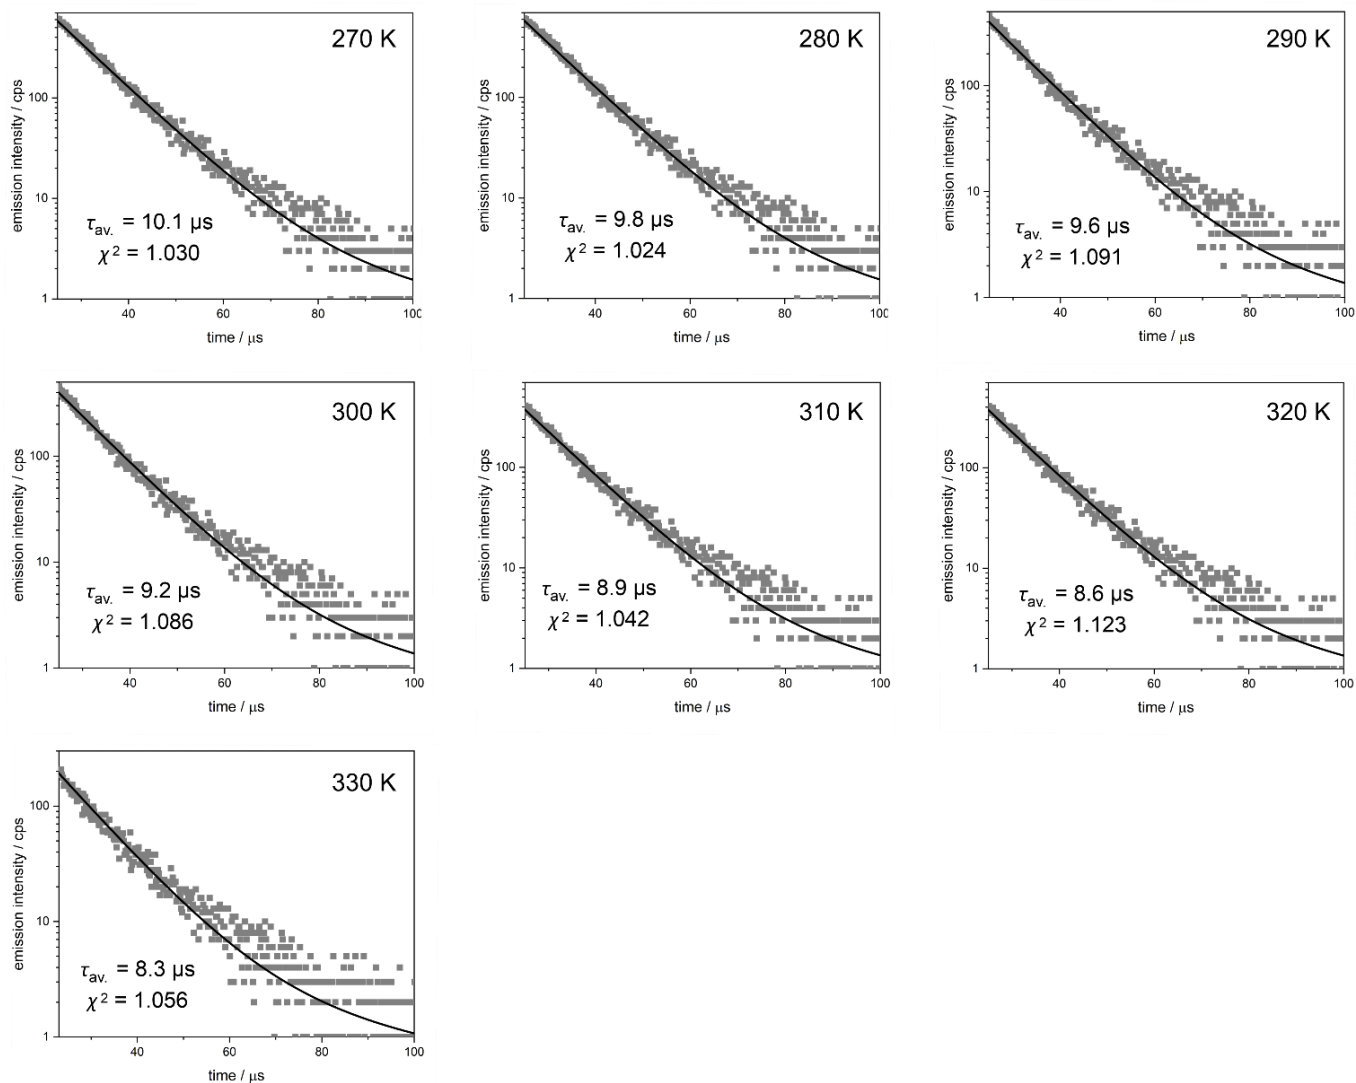

**Fig. S66** (part 3 of 3) Temperature-variable emission decay profiles for **Re<sub>2</sub>-bpy** under  $\lambda_{\text{exc}} = 430 \text{ nm}$  and  $\lambda_{\text{em}} = 584 \text{ nm}$ , collected for the indicated temperatures from the 30–330 K range (in this part, the region of 270–330 K is shown). The double exponential fitting was applied for each temperature; the related best-fit curve is illustrated by a solid line. The best-fit parameters are roughly presented on the graphs while the detailed values are gathered in Table S73.

**Table S73** Best-fit parameters for the emission decay profiles of **Re<sub>2</sub>-bpy** to the double exponential decay function (represented by the  $\tau_1$  and  $\tau_2$  values of emission lifetime components, with the respective contributions given in the brackets next to the lifetime values), and the calculated weighted-average emission lifetime ( $\tau_{av.}$ ), all presented for the 30–330 K temperature range (see Fig. S66 for the respective emission decay profiles).

| parameter                    | <b>Re<sub>2</sub>-bpy</b> |               |               |               |              |              |
|------------------------------|---------------------------|---------------|---------------|---------------|--------------|--------------|
|                              | 30 K                      | 40 K          | 50 K          | 60 K          | 70 K         | 80 K         |
| $\tau_1$ (%) / $\mu\text{s}$ | 84.3 (42.94)              | 78.8 (44.86)  | 73.3 (46.78)  | 64.2 (40.98)  | 55.1 (35.18) | 48.1 (32.89) |
| $\tau_2$ (%) / $\mu\text{s}$ | 135.6 (57.06)             | 125.2 (55.14) | 114.8 (53.22) | 104.6 (59.02) | 94.5 (64.82) | 86.4 (67.11) |
| $\tau_{av.}$ / $\mu\text{s}$ | 113.6                     | 104.4         | 95.4          | 88.1          | 80.6         | 73.8         |
| $\chi^2$                     | 1.016                     | 1.092         | 1.104         | 1.124         | 1.015        | 1.029        |
|                              | 90 K                      | 100 K         | 110 K         | 120 K         | 130 K        | 140 K        |
| $\tau_1$ (%) / $\mu\text{s}$ | 41.0 (30.60)              | 35.4 (29.80)  | 29.8 (29.00)  | 27.9 (35.67)  | 25.9 (42.35) | 23.5 (45.19) |
| $\tau_2$ (%) / $\mu\text{s}$ | 78.4 (69.40)              | 73.2 (70.20)  | 68.0 (71.00)  | 64.6 (64.33)  | 61.3 (57.65) | 57.2 (54.81) |
| $\tau_{av.}$ / $\mu\text{s}$ | 66.9                      | 61.9          | 56.9          | 51.5          | 46.3         | 42.0         |
| $\chi^2$                     | 1.083                     | 1.028         | 1.011         | 1.090         | 1.002        | 1.002        |
|                              | 150 K                     | 160 K         | 170 K         | 180 K         | 190 K        | 200 K        |
| $\tau_1$ (%) / $\mu\text{s}$ | 21.0 (48.03)              | 18.9 (50.54)  | 16.7 (53.04)  | 15.2 (54.06)  | 13.7 (55.09) | 12.6 (55.78) |
| $\tau_2$ (%) / $\mu\text{s}$ | 53.2 (51.97)              | 49.5 (49.46)  | 45.9 (46.96)  | 42.2 (45.94)  | 38.6 (44.91) | 34.7 (44.22) |
| $\tau_{av.}$ / $\mu\text{s}$ | 37.7                      | 34.0          | 30.4          | 27.6          | 24.8         | 22.4         |
| $\chi^2$                     | 1.101                     | 1.023         | 1.001         | 1.075         | 1.051        | 1.009        |
|                              | 210 K                     | 220 K         | 230 K         | 240 K         | 250 K        | 260 K        |
| $\tau_1$ (%) / $\mu\text{s}$ | 11.6 (56.47)              | 11.2 (60.76)  | 10.8 (65.05)  | 10.4 (73.56)  | 10.1 (82.07) | 9.9 (89.30)  |
| $\tau_2$ (%) / $\mu\text{s}$ | 30.9 (43.53)              | 28.7 (39.24)  | 26.5 (34.95)  | 25.1 (26.44)  | 23.7 (17.93) | 22.8 (10.70) |
| $\tau_{av.}$ / $\mu\text{s}$ | 20.0                      | 18.0          | 16.3          | 14.3          | 12.6         | 11.3         |
| $\chi^2$                     | 1.001                     | 1.027         | 1.134         | 1.057         | 1.056        | 1.082        |
|                              | 270 K                     | 280 K         | 290 K         | 300 K         | 310 K        | 320 K        |
| $\tau_1$ (%) / $\mu\text{s}$ | 9.7 (96.53)               | 9.5 (97.03)   | 9.3 (97.54)   | 9.0 (97.98)   | 8.7 (98.42)  | 8.4 (98.68)  |
| $\tau_2$ (%) / $\mu\text{s}$ | 21.8 (3.47)               | 20.8 (2.97)   | 19.8 (2.46)   | 19.3 (2.02)   | 18.8 (1.58)  | 18.1 (1.32)  |
| $\tau_{av.}$ / $\mu\text{s}$ | 10.1                      | 9.8           | 9.6           | 9.2           | 8.9          | 8.6          |
| $\chi^2$                     | 1.030                     | 1.024         | 1.091         | 1.086         | 1.042        | 1.123        |
|                              | 330 K                     | –             | –             | –             | –            | –            |
| $\tau_1$ (%) / $\mu\text{s}$ | 8.2 (98.95)               | –             | –             | –             | –            | –            |
| $\tau_2$ (%) / $\mu\text{s}$ | 17.4 (1.05)               | –             | –             | –             | –            | –            |
| $\tau_{av.}$ / $\mu\text{s}$ | 8.3                       | –             | –             | –             | –            | –            |
| $\chi^2$                     | 1.056                     | –             | –             | –             | –            | –            |

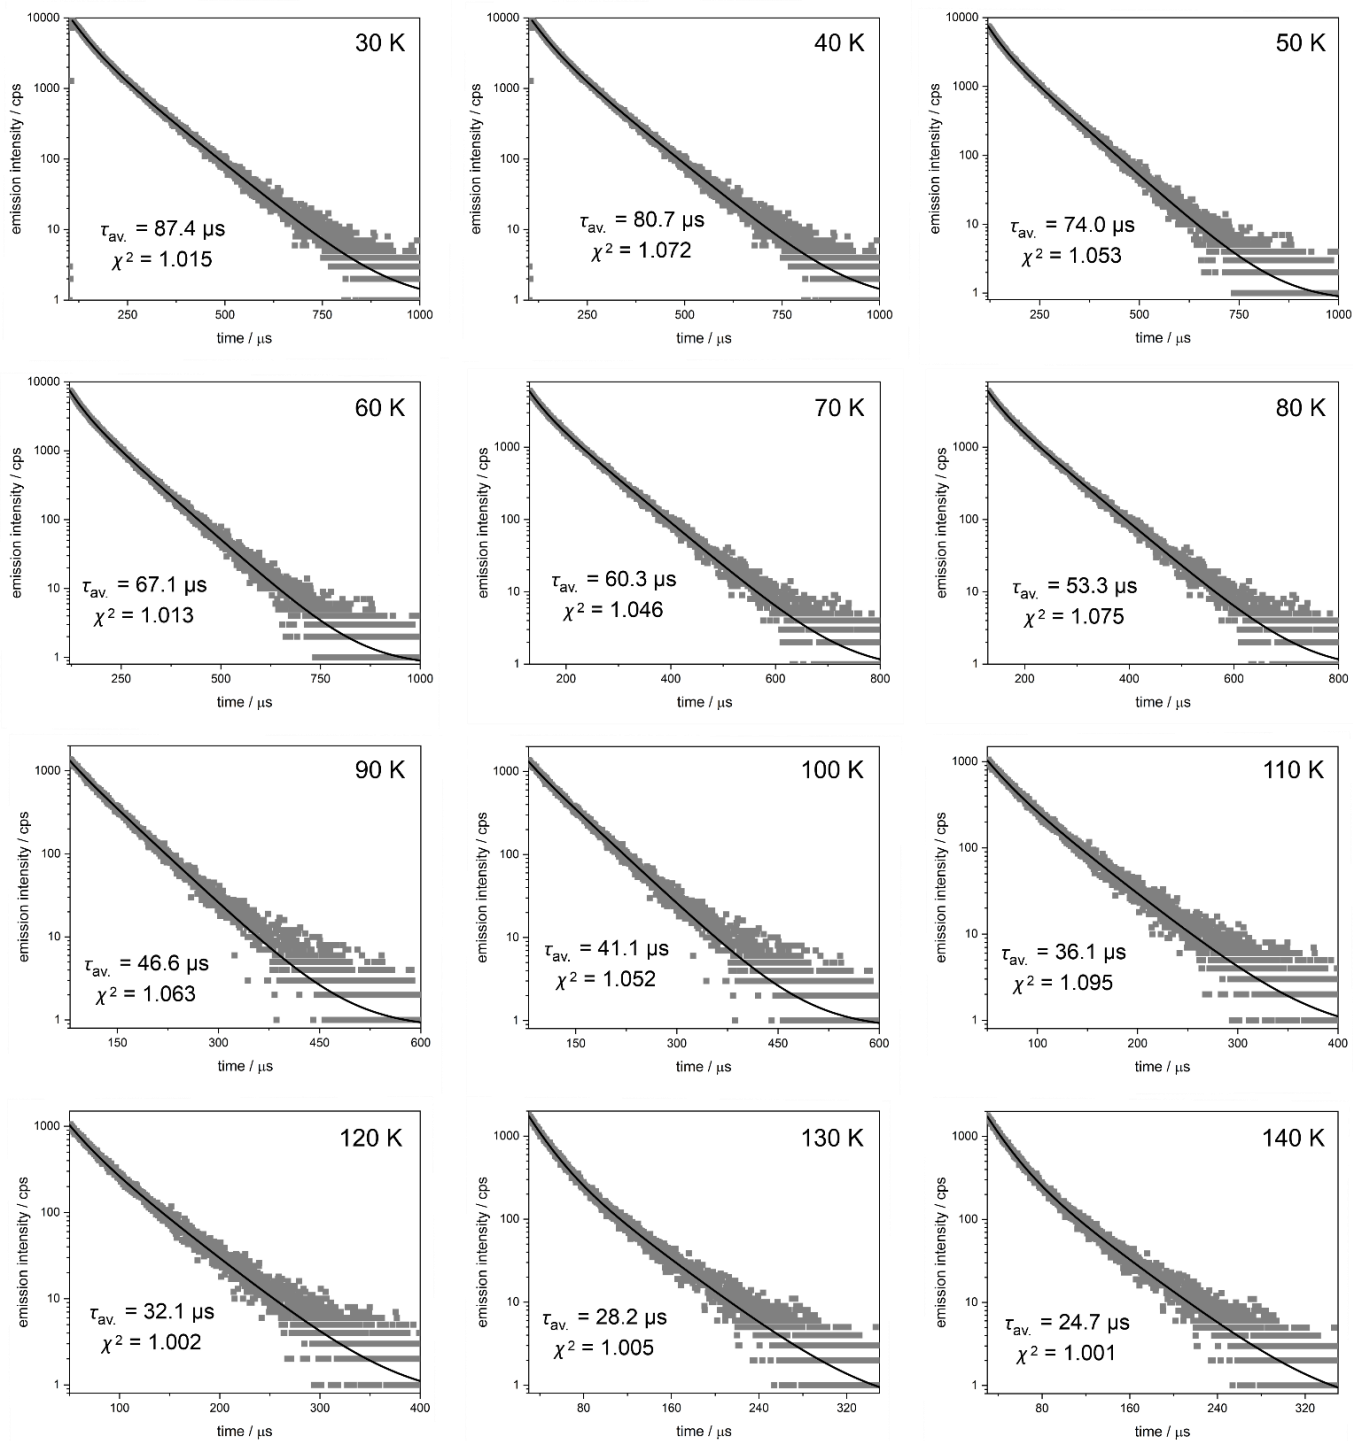

**Fig. S67** (part 1 of 2) Temperature-variable emission decay profiles for **Re<sub>2</sub>-bpac** under  $\lambda_{exc} = 430$  nm and  $\lambda_{em} = 598$  nm, collected for the indicated temperatures from the 30–240 K range (in this part, the region of 30–140 K is shown). The double exponential fitting was applied for each temperature; the related best-fit curve is illustrated by a solid line. The best-fit parameters are roughly presented on the graphs while the detailed values are gathered in Table S74.



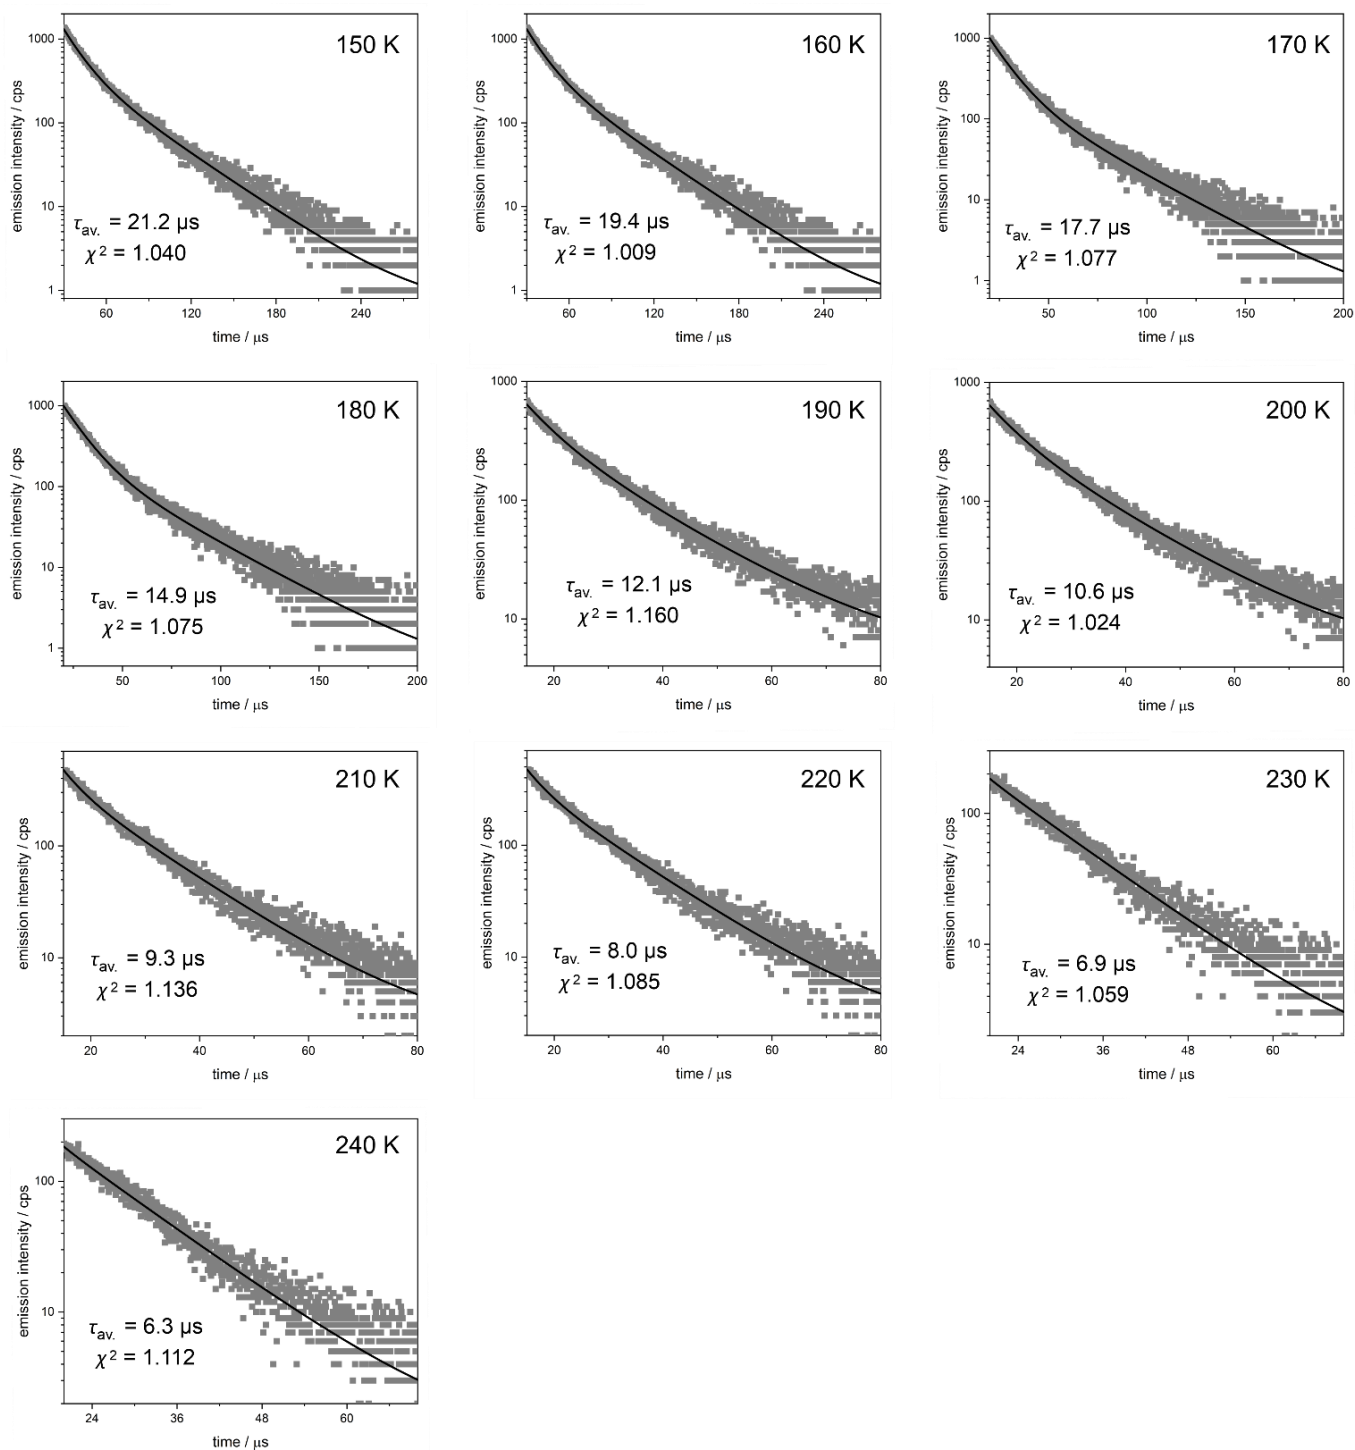

**Fig. S67** (part 2 of 2) Temperature-variable emission decay profiles for **Re<sub>2</sub>-bpac** under  $\lambda_{\text{exc}} = 430$  nm and  $\lambda_{\text{em}} = 598$  nm, collected for the indicated temperatures from the 30–240 K range (in this part, the region of 150–240 K is shown). The double exponential fitting was applied for each temperature; the related best-fit curve is illustrated by a solid line. The best-fit parameters are roughly presented on the graphs while the detailed values are gathered in Table S74.

**Table S74** Best-fit parameters for the emission decay profiles of **Re<sub>2</sub>-bpac** to the double exponential decay function (represented by the  $\tau_1$  and  $\tau_2$  values of emission lifetime components, with the respective contributions given in the brackets next to the lifetime values), and the calculated weighted-average emission lifetime ( $\tau_{av.}$ ), all presented for the 30–240 K temperature range (see Fig. S67 for the respective emission decay profiles).

| parameter                    | <b>Re<sub>2</sub>-bpac</b> |              |              |              |              |              |
|------------------------------|----------------------------|--------------|--------------|--------------|--------------|--------------|
|                              | 30 K                       | 40 K         | 50 K         | 60 K         | 70 K         | 80 K         |
| $\tau_1$ (%) / $\mu\text{s}$ | 40.4 (16.85)               | 35.6 (18.57) | 30.7 (20.30) | 27.4 (22.28) | 24.0 (24.27) | 22.1 (26.53) |
| $\tau_2$ (%) / $\mu\text{s}$ | 96.9 (83.15)               | 91.0 (81.43) | 85.0 (79.70) | 78.5 (77.72) | 71.9 (75.73) | 64.6 (73.47) |
| $\tau_{av.}$ / $\mu\text{s}$ | 87.4                       | 80.7         | 74.0         | 67.1         | 60.3         | 53.3         |
| $\chi^2$                     | 1.015                      | 1.072        | 1.053        | 1.013        | 1.046        | 1.075        |
|                              | 90 K                       | 100 K        | 110 K        | 120 K        | 130 K        | 140 K        |
| $\tau_1$ (%) / $\mu\text{s}$ | 20.2 (28.79)               | 19.8 (34.88) | 19.4 (40.97) | 18.2 (49.91) | 16.9 (58.85) | 14.6 (61.83) |
| $\tau_2$ (%) / $\mu\text{s}$ | 57.3 (71.21)               | 52.5 (65.12) | 47.7 (59.03) | 46.1 (50.09) | 44.5 (41.15) | 41.1 (38.17) |
| $\tau_{av.}$ / $\mu\text{s}$ | 46.6                       | 41.1         | 36.1         | 32.1         | 28.2         | 24.7         |
| $\chi^2$                     | 1.063                      | 1.052        | 1.095        | 1.002        | 1.005        | 1.001        |
|                              | 150 K                      | 160 K        | 170 K        | 180 K        | 190 K        | 200 K        |
| $\tau_1$ (%) / $\mu\text{s}$ | 12.2 (64.81)               | 11.1 (65.24) | 10.1 (65.68) | 7.8 (66.29)  | 5.5 (66.91)  | 4.6 (67.89)  |
| $\tau_2$ (%) / $\mu\text{s}$ | 37.7 (35.19)               | 35.0 (34.76) | 32.2 (34.32) | 28.9 (33.71) | 25.7 (33.09) | 23.5 (32.11) |
| $\tau_{av.}$ / $\mu\text{s}$ | 21.2                       | 19.4         | 17.7         | 14.9         | 12.1         | 10.6         |
| $\chi^2$                     | 1.040                      | 1.009        | 1.077        | 1.075        | 1.160        | 1.024        |
|                              | 210 K                      | 220 K        | 230 K        | 240 K        | –            | –            |
| $\tau_1$ (%) / $\mu\text{s}$ | 3.7 (68.88)                | 3.0 (69.13)  | 2.3(69.37)   | 2.1 (69.87)  | –            | –            |
| $\tau_2$ (%) / $\mu\text{s}$ | 21.4 (31.12)               | 19.3 (30.87) | 17.2 (30.63) | 15.9 (30.13) | –            | –            |
| $\tau_{av.}$ / $\mu\text{s}$ | 9.3                        | 8.0          | 6.9          | 6.3          | –            | –            |
| $\chi^2$                     | 1.136                      | 1.085        | 1.059        | 1.112        | –            | –            |

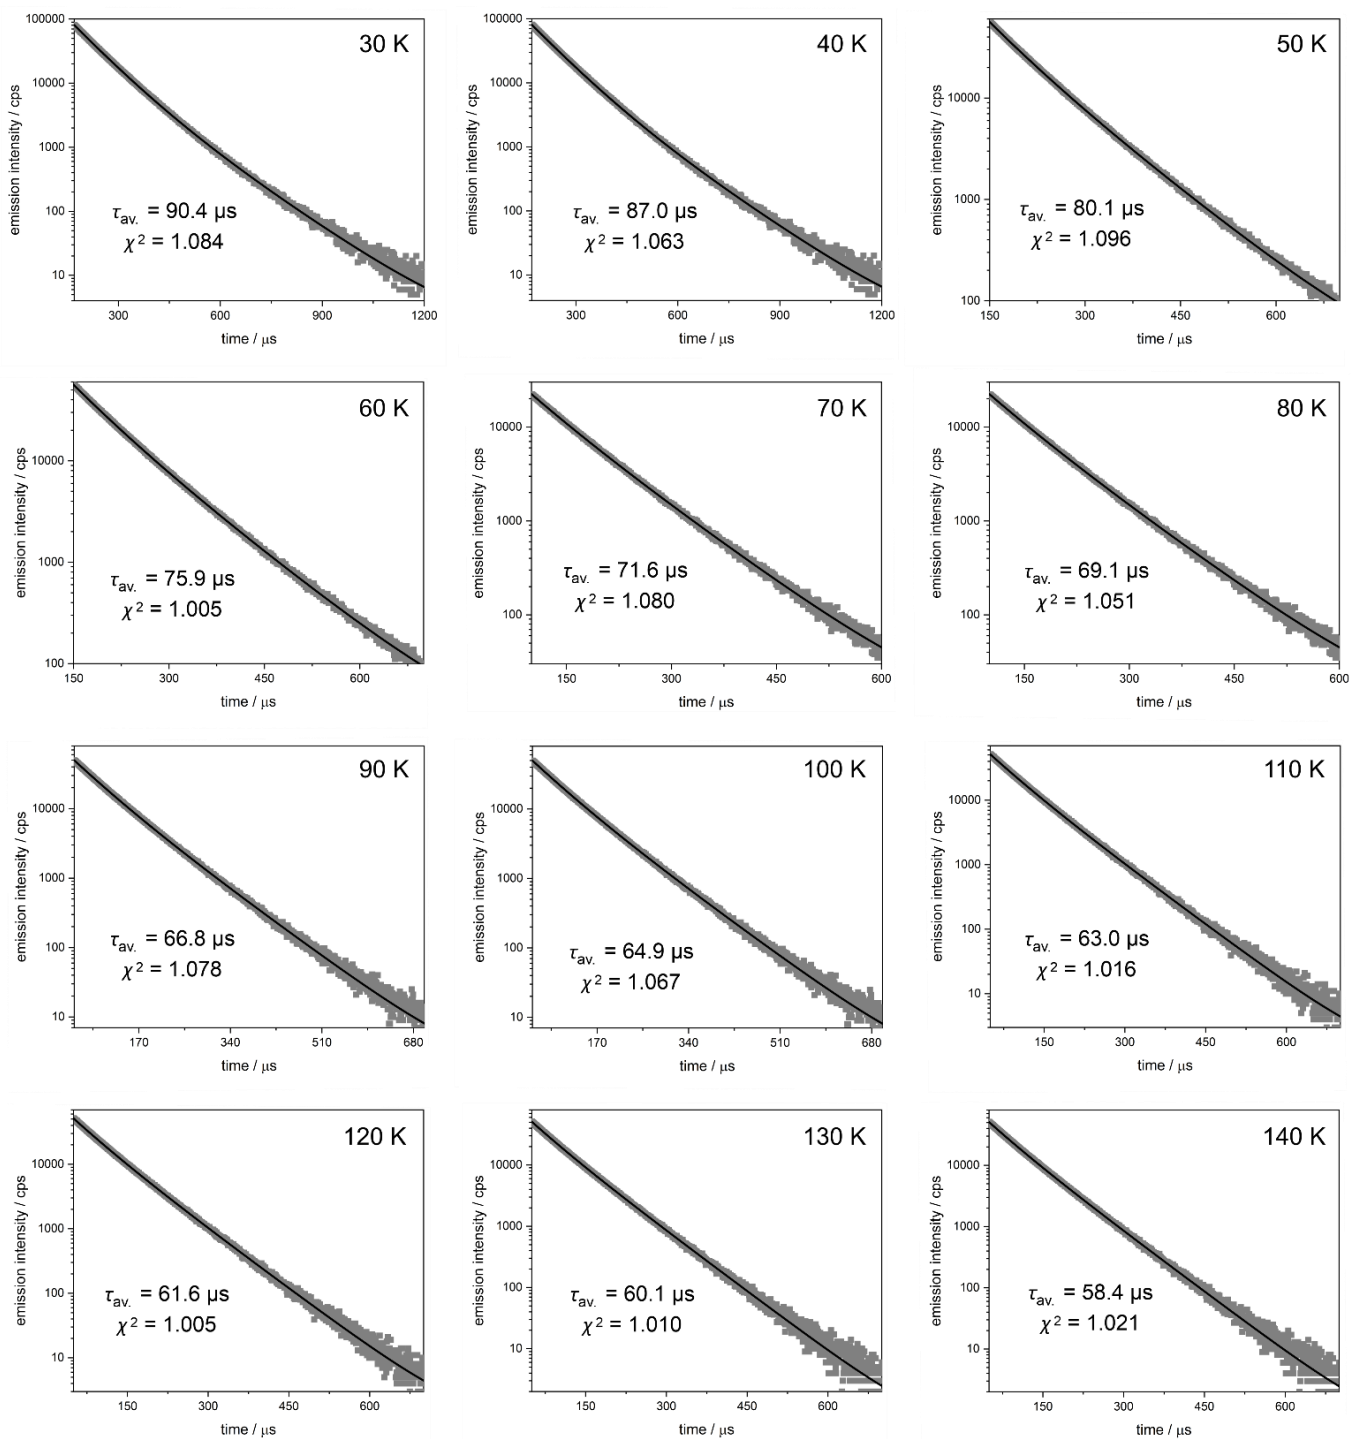

**Fig. S68** (part 1 of 3) Temperature-variable emission decay profiles for **Re<sub>2</sub>-bpen** under  $\lambda_{\text{exc}} = 430$  nm and  $\lambda_{\text{em}} = 616$  nm, collected for the indicated temperatures from the 30–330 K range (in this part, the region of 30–140 K is shown). The double exponential fitting was applied for each temperature; the related best-fit curve is illustrated by a solid line. The best-fit parameters are roughly presented on the graphs while the detailed values are gathered in Table S75.

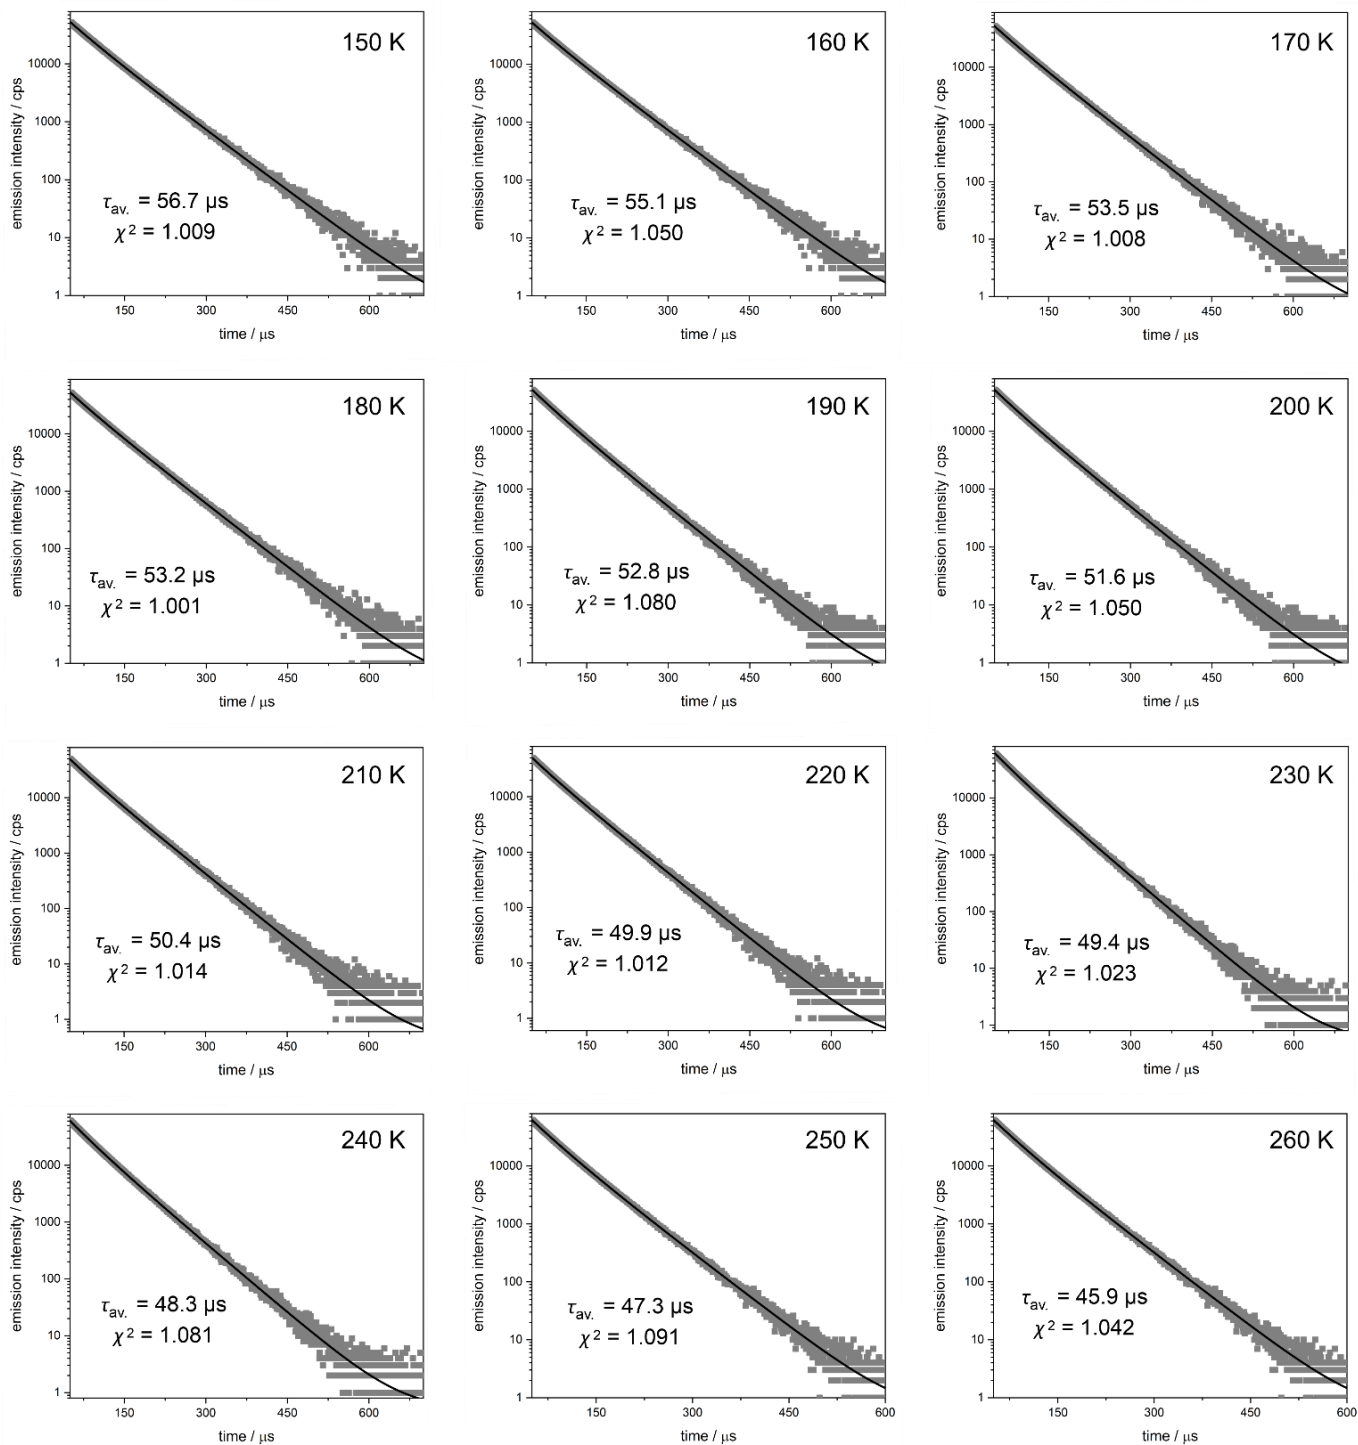

**Fig. S68** (part 2 of 3) Temperature-variable emission decay profiles for **Re<sub>2</sub>-bpen** under  $\lambda_{exc} = 430$  nm and  $\lambda_{em} = 616$  nm, collected for the indicated temperatures from the 30–330 K range (in this part, the region of 150–260 K is shown). The double exponential fitting was applied for each temperature; the related best-fit curve is illustrated by a solid line. The best-fit parameters are roughly presented on the graphs while the detailed values are gathered in Table S75.

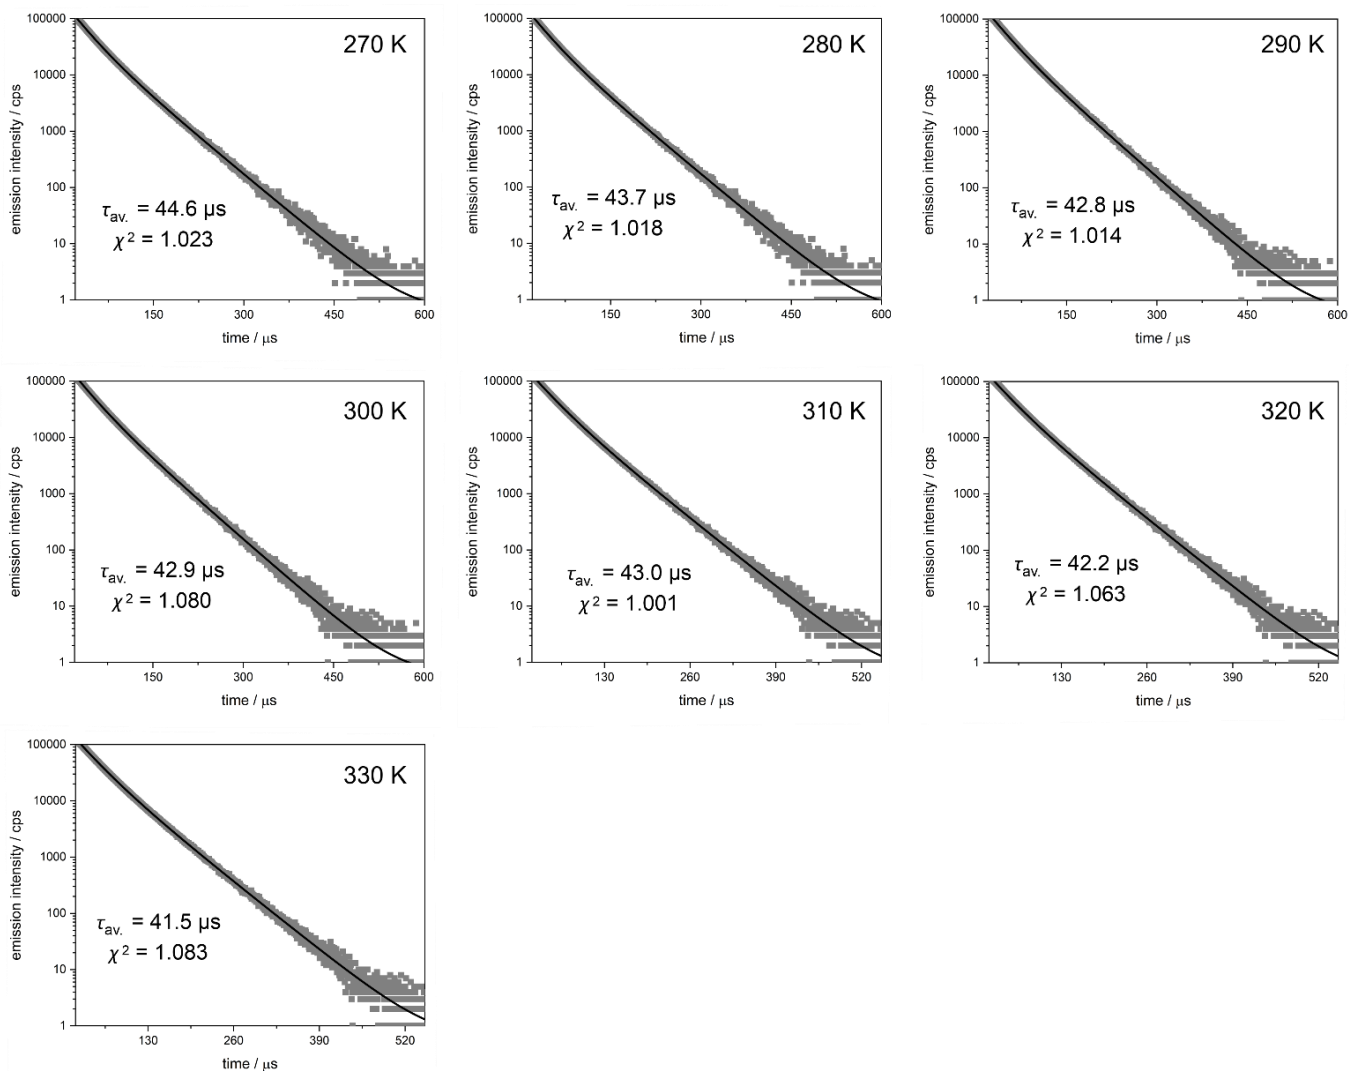

**Fig. S68** (part 3 of 3) Temperature-variable emission decay profiles for **Re<sub>2</sub>-bpen** under  $\lambda_{exc} = 430$  nm and  $\lambda_{em} = 616$  nm, collected for the indicated temperatures from the 30–330 K range (in this part, the region of 270–330 K is shown). The double exponential fitting was applied for each temperature; the related best-fit curve is illustrated by a solid line. The best-fit parameters are roughly presented on the graphs while the detailed values are gathered in Table S75.

**Table S75** Best-fit parameters for the emission decay profiles of **Re<sub>2</sub>-bpen** to the double exponential decay function (represented by the  $\tau_1$  and  $\tau_2$  values of emission lifetime components, with the respective contributions given in the brackets next to the lifetime values), and the calculated weighted-average emission lifetime ( $\tau_{av.}$ ), all presented for the 30–330 K temperature range (see Fig. S68 for the respective emission decay profiles).

| parameter                    | <b>Re<sub>2</sub>-bpen</b> |               |              |              |              |              |
|------------------------------|----------------------------|---------------|--------------|--------------|--------------|--------------|
|                              | 30 K                       | 40 K          | 50 K         | 60 K         | 70 K         | 80 K         |
| $\tau_1$ (%) / $\mu\text{s}$ | 74.5 (69.35)               | 66.6 (51.33)  | 58.6 (33.31) | 54.0 (33.19) | 49.4 (33.08) | 48.6 (34.88) |
| $\tau_2$ (%) / $\mu\text{s}$ | 126.2 (30.65)              | 108.5 (48.67) | 90.9 (66.69) | 86.7 (66.81) | 82.5 (66.92) | 80.1 (65.12) |
| $\tau_{av.}$ / $\mu\text{s}$ | 90.4                       | 87.0          | 80.1         | 75.9         | 71.6         | 69.1         |
| $\chi^2$                     | 1.084                      | 1.063         | 1.096        | 1.005        | 1.080        | 1.051        |
|                              | 90 K                       | 100 K         | 110 K        | 120 K        | 130 K        | 140 K        |
| $\tau_1$ (%) / $\mu\text{s}$ | 47.9 (36.67)               | 45.6 (32.64)  | 43.4 (28.61) | 41.5 (26.05) | 39.7 (23.48) | 38.3 (23.13) |
| $\tau_2$ (%) / $\mu\text{s}$ | 77.7 (63.33)               | 74.3 (67.36)  | 70.9 (71.39) | 68.6 (73.95) | 66.4 (76.52) | 64.5 (76.87) |
| $\tau_{av.}$ / $\mu\text{s}$ | 66.8                       | 64.9          | 63.0         | 61.6         | 60.1         | 58.4         |
| $\chi^2$                     | 1.078                      | 1.067         | 1.016        | 1.005        | 1.010        | 1.021        |
|                              | 150 K                      | 160 K         | 170 K        | 180 K        | 190 K        | 200 K        |
| $\tau_1$ (%) / $\mu\text{s}$ | 37.0 (22.79)               | 35.5 (22.63)  | 33.9 (22.47) | 34.4 (21.94) | 34.9 (21.42) | 33.2 (21.20) |
| $\tau_2$ (%) / $\mu\text{s}$ | 62.6 (77.21)               | 60.9 (77.37)  | 59.2 (77.53) | 58.5 (78.06) | 57.7 (78.58) | 56.5 (78.80) |
| $\tau_{av.}$ / $\mu\text{s}$ | 56.7                       | 55.1          | 53.5         | 53.2         | 52.8         | 51.6         |
| $\chi^2$                     | 1.009                      | 1.050         | 1.008        | 1.001        | 1.080        | 1.050        |
|                              | 210 K                      | 220 K         | 230 K        | 240 K        | 250 K        | 260 K        |
| $\tau_1$ (%) / $\mu\text{s}$ | 31.5 (20.97)               | 31.8 (20.57)  | 32.0 (20.17) | 31.4 (20.07) | 30.8 (19.96) | 28.5 (19.74) |
| $\tau_2$ (%) / $\mu\text{s}$ | 55.4 (79.03)               | 54.6 (79.43)  | 53.8 (79.83) | 52.6 (79.93) | 51.4 (80.04) | 50.2 (80.26) |
| $\tau_{av.}$ / $\mu\text{s}$ | 50.4                       | 49.9          | 49.4         | 48.3         | 47.3         | 45.9         |
| $\chi^2$                     | 1.014                      | 1.012         | 1.023        | 1.081        | 1.091        | 1.042        |
|                              | 270 K                      | 280 K         | 290 K        | 300 K        | 310 K        | 320 K        |
| $\tau_1$ (%) / $\mu\text{s}$ | 26.3 (19.52)               | 26.2 (19.47)  | 26.1 (19.42) | 26.3 (18.97) | 26.4 (18.52) | 25.7 (18.17) |
| $\tau_2$ (%) / $\mu\text{s}$ | 49.0 (80.48)               | 47.9 (80.53)  | 46.8 (80.58) | 46.8 (81.03) | 46.7 (81.48) | 45.9 (81.83) |
| $\tau_{av.}$ / $\mu\text{s}$ | 44.6                       | 43.7          | 42.8         | 42.9         | 43.0         | 42.2         |
| $\chi^2$                     | 1.023                      | 1.018         | 1.014        | 10.080       | 1.001        | 1.063        |
|                              | 330 K                      | –             | –            | –            | –            | –            |
| $\tau_1$ (%) / $\mu\text{s}$ | 25.1 (17.81)               | –             | –            | –            | –            | –            |
| $\tau_2$ (%) / $\mu\text{s}$ | 45.1 (82.19)               | –             | –            | –            | –            | –            |
| $\tau_{av.}$ / $\mu\text{s}$ | 41.5                       | –             | –            | –            | –            | –            |
| $\chi^2$                     | 1.083                      | –             | –            | –            | –            | –            |

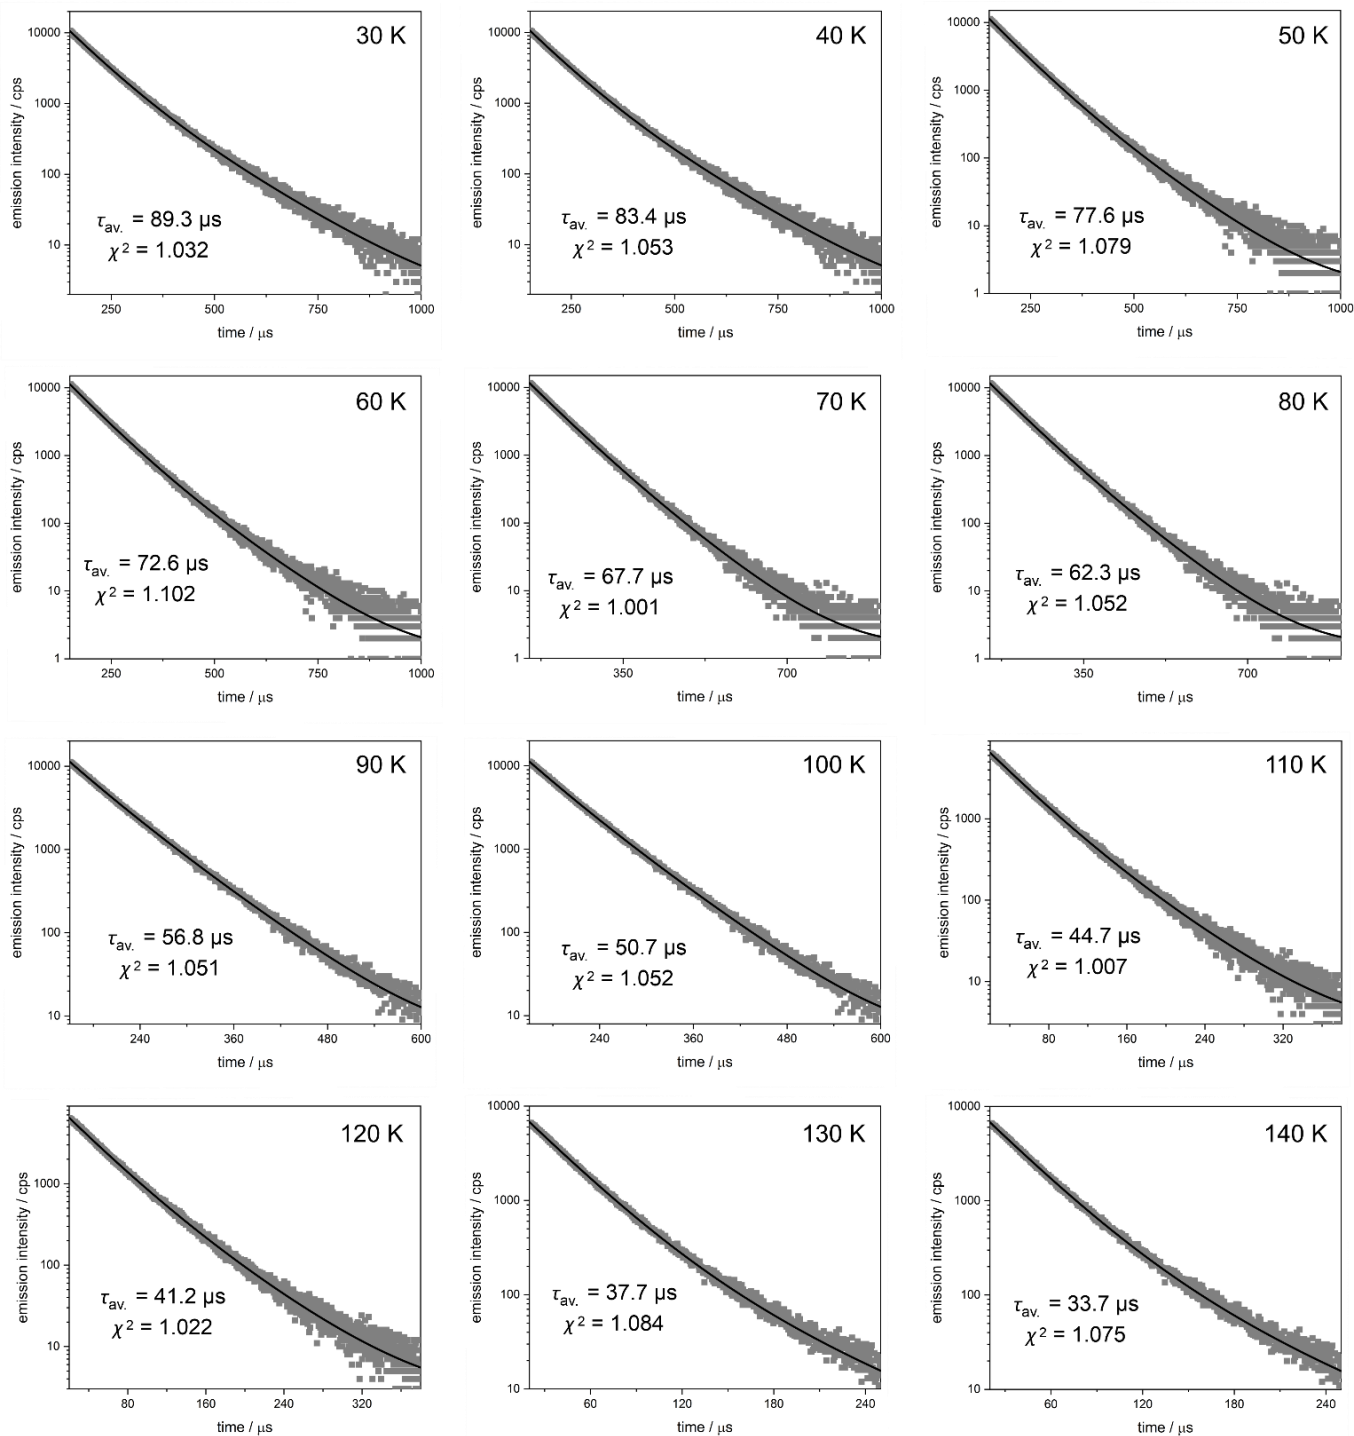

**Fig. S69** (part 1 of 3) Temperature-variable emission decay profiles for **Re<sub>2</sub>-bpb** under  $\lambda_{exc} = 430$  nm and  $\lambda_{em} = 602$  nm, collected for the indicated temperatures from the 30–330 K range (in this part, the region of 30–140 K is shown). The double exponential fitting was applied for each temperature; the related best-fit curve is illustrated by a solid line). The best-fit parameters are roughly presented on the graphs while the detailed values are gathered in Table S76.

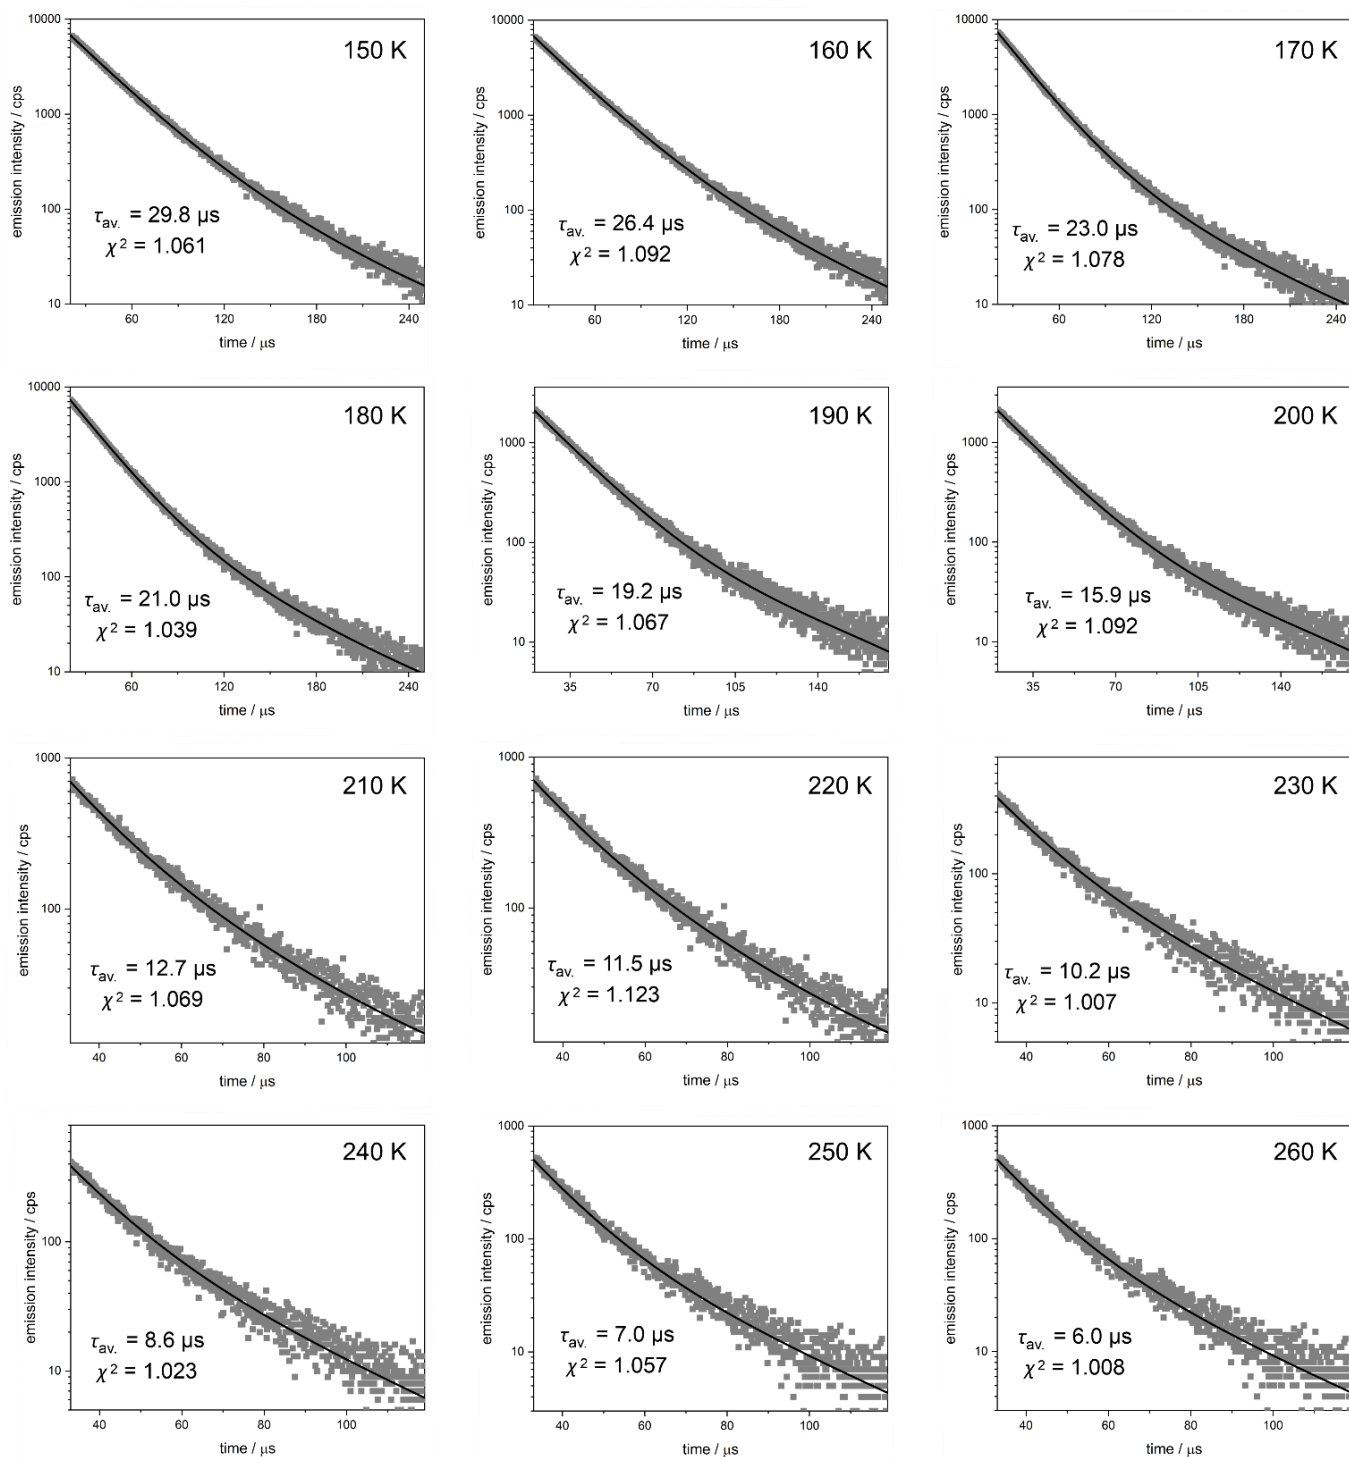

**Fig. S69** (part 2 of 3) Temperature-variable emission decay profiles for **Re<sub>2</sub>-bpb** under  $\lambda_{exc} = 430$  nm and  $\lambda_{em} = 602$  nm, collected for the indicated temperatures from the 30–330 K range (in this part, the region of 150–260 K is shown). The double exponential fitting was applied for each temperature; the related best-fit curve is illustrated by a solid line). The best-fit parameters are roughly presented on the graphs while the detailed values are gathered in Table S76.



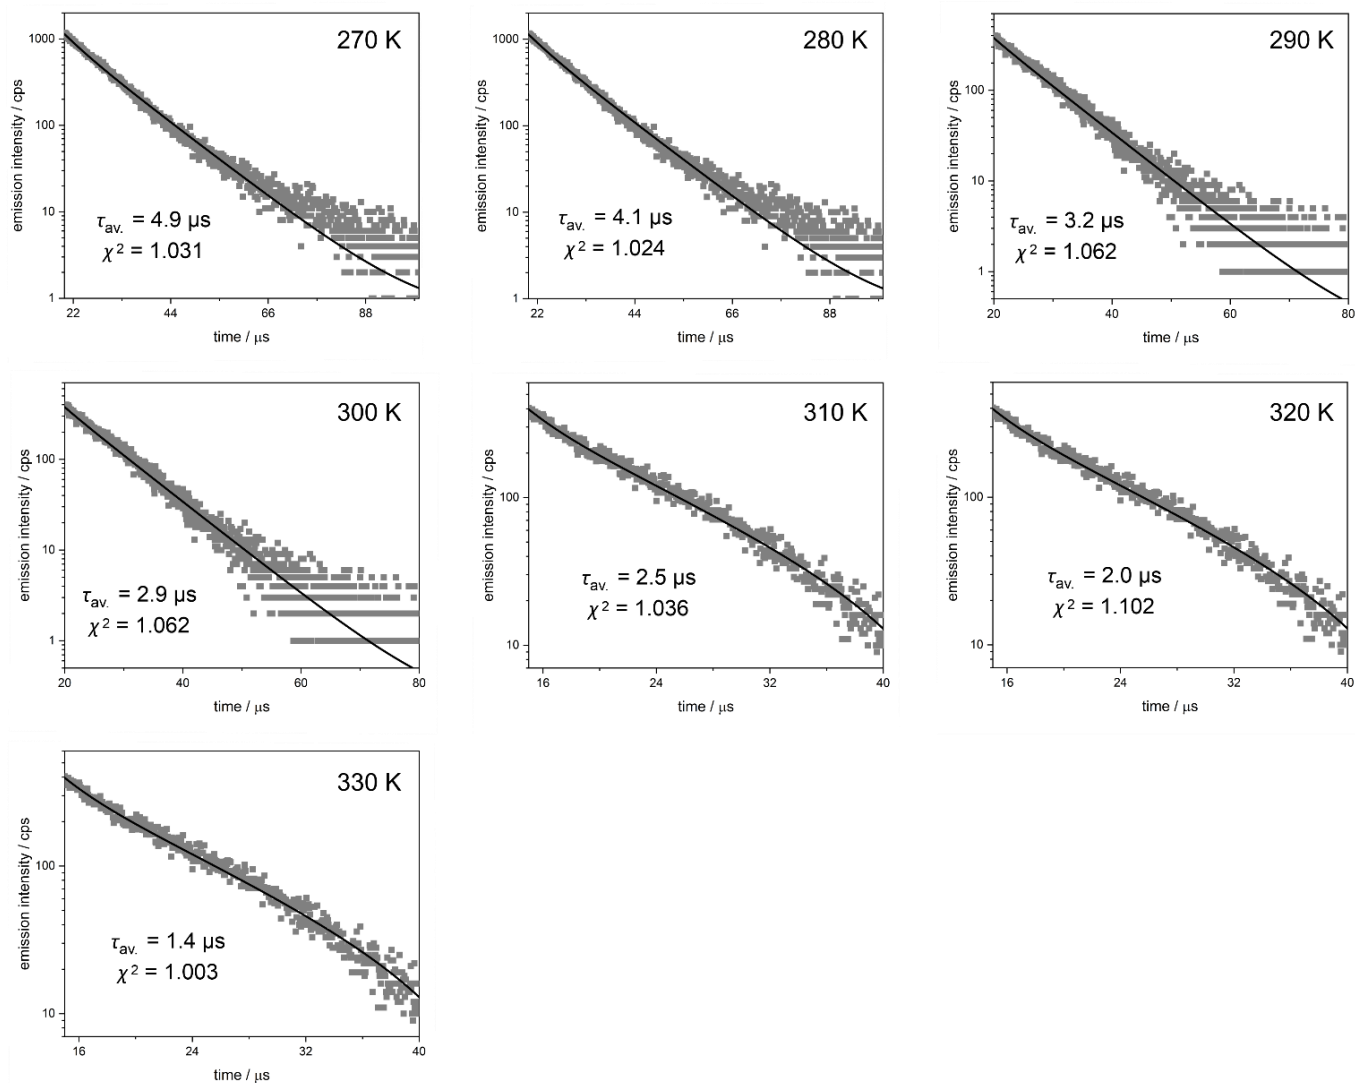

**Fig. S69** (part 3 of 3) Temperature-variable emission decay profiles for  $\text{Re}_2\text{-bpb}$  under  $\lambda_{\text{exc}} = 430$  nm and  $\lambda_{\text{em}} = 602$  nm, collected for the indicated temperatures from the 30–330 K range (in this part, the region of 270–330 K is shown). The double exponential fitting was applied for each temperature; the related best-fit curve is illustrated by a solid line). The best-fit parameters are roughly presented on the graphs while the detailed values are gathered in Table S76.

**Table S76** Best-fit parameters for the emission decay profiles of **Re<sub>2</sub>-bpb** to the double exponential decay function (represented by the  $\tau_1$  and  $\tau_2$  values of emission lifetime components, with the respective contributions given in the brackets next to the lifetime values), and the calculated weighted-average emission lifetime ( $\tau_{av.}$ ), all presented for the 30–330 K temperature range (see Fig. S69 for the respective emission decay profiles).

| parameter                    | <b>Re<sub>2</sub>-bpb</b> |               |               |              |              |              |
|------------------------------|---------------------------|---------------|---------------|--------------|--------------|--------------|
|                              | 30 K                      | 40 K          | 50 K          | 60 K         | 70 K         | 80 K         |
| $\tau_1$ (%) / $\mu\text{s}$ | 69.9 (68.08)              | 67.2 (68.80)  | 64.5 (69.51)  | 61.6 (69.93) | 58.7(70.36)  | 53.7 (70.94) |
| $\tau_2$ (%) / $\mu\text{s}$ | 130.7 (31.92)             | 119.1 (31.20) | 107.4 (30.49) | 98.3 (30.07) | 89.2 (29.64) | 83.3 (29.06) |
| $\tau_{av.}$ / $\mu\text{s}$ | 89.3                      | 83.4          | 77.6          | 72.6         | 67.7         | 62.3         |
| $\chi^2$                     | 1.032                     | 1.053         | 1.079         | 1.102        | 1.001        | 1.052        |
|                              | 90 K                      | 100 K         | 110 K         | 120 K        | 130 K        | 140 K        |
| $\tau_1$ (%) / $\mu\text{s}$ | 48.7 (71.52)              | 44.3 (73.57)  | 39.9 (75.62)  | 36.9 (76.89) | 33.8 (78.16) | 30.3 (79.31) |
| $\tau_2$ (%) / $\mu\text{s}$ | 77.4 (28.48)              | 68.5 (26.43)  | 59.6 (24.38)  | 55.6 (23.11) | 51.6 (21.84) | 46.9 (20.69) |
| $\tau_{av.}$ / $\mu\text{s}$ | 56.8                      | 50.7          | 44.7          | 41.2         | 37.7         | 33.7         |
| $\chi^2$                     | 1.051                     | 1.052         | 1.007         | 1.022        | 1.084        | 1.075        |
|                              | 150 K                     | 160 K         | 170 K         | 180 K        | 190 K        | 200 K        |
| $\tau_1$ (%) / $\mu\text{s}$ | 26.7 (80.45)              | 23.8 (82.69)  | 20.8 (84.93)  | 19.4 (86.63) | 17.9 (88.34) | 14.8 (89.22) |
| $\tau_2$ (%) / $\mu\text{s}$ | 42.3 (19.55)              | 38.7 (17.31)  | 35.2 (15.07)  | 31.8 (13.37) | 28.5 (11.66) | 25.7 (10.78) |
| $\tau_{av.}$ / $\mu\text{s}$ | 29.8                      | 26.4          | 23.0          | 21.0         | 19.2         | 15.9         |
| $\chi^2$                     | 1.061                     | 1.092         | 1.078         | 1.039        | 1.067        | 1.092        |
|                              | 210 K                     | 220 K         | 230 K         | 240 K        | 250 K        | 260 K        |
| $\tau_1$ (%) / $\mu\text{s}$ | 11.6 (90.10)              | 10.5 (90.73)  | 9.5 (91.36)   | 8.0 (91.92)  | 6.5 (92.47)  | 5.4 (92.68)  |
| $\tau_2$ (%) / $\mu\text{s}$ | 23.0 (9.90)               | 20.9 (9.27)   | 18.8 (8.64)   | 16.2 (8.08)  | 13.7 (7.53)  | 12.4 (7.32)  |
| $\tau_{av.}$ / $\mu\text{s}$ | 12.7                      | 11.5          | 10.2          | 8.6          | 7.0          | 6.0          |
| $\chi^2$                     | 1.069                     | 1.123         | 1.007         | 1.023        | 1.057        | 1.008        |
|                              | 270 K                     | 280 K         | 290 K         | 300 K        | 310 K        | 320 K        |
| $\tau_1$ (%) / $\mu\text{s}$ | 4.4 (92.9)                | 3.6 (93.02)   | 2.8 (93.14)   | 2.6 (93.38)  | 2.3 (93.63)  | 1.8 (93.88)  |
| $\tau_2$ (%) / $\mu\text{s}$ | 11.1 (7.1)                | 9.8 (6.98)    | 8.5 (6.86)    | 7.3 (6.62)   | 6.2 (6.37)   | 4.9 (6.12)   |
| $\tau_{av.}$ / $\mu\text{s}$ | 4.9                       | 4.1           | 3.2           | 2.9          | 2.5          | 2.0          |
| $\chi^2$                     | 1.031                     | 1.024         | 1.062         | 1.022        | 1.036        | 1.102        |
|                              | 330 K                     | –             | –             | –            | –            | –            |
| $\tau_1$ (%) / $\mu\text{s}$ | 1.3 (94.13)               | –             | –             | –            | –            | –            |
| $\tau_2$ (%) / $\mu\text{s}$ | 3.63 (5.87)               | –             | –             | –            | –            | –            |
| $\tau_{av.}$ / $\mu\text{s}$ | 1.4                       | –             | –             | –            | –            | –            |
| $\chi^2$                     | 1.003                     | –             | –             | –            | –            | –            |

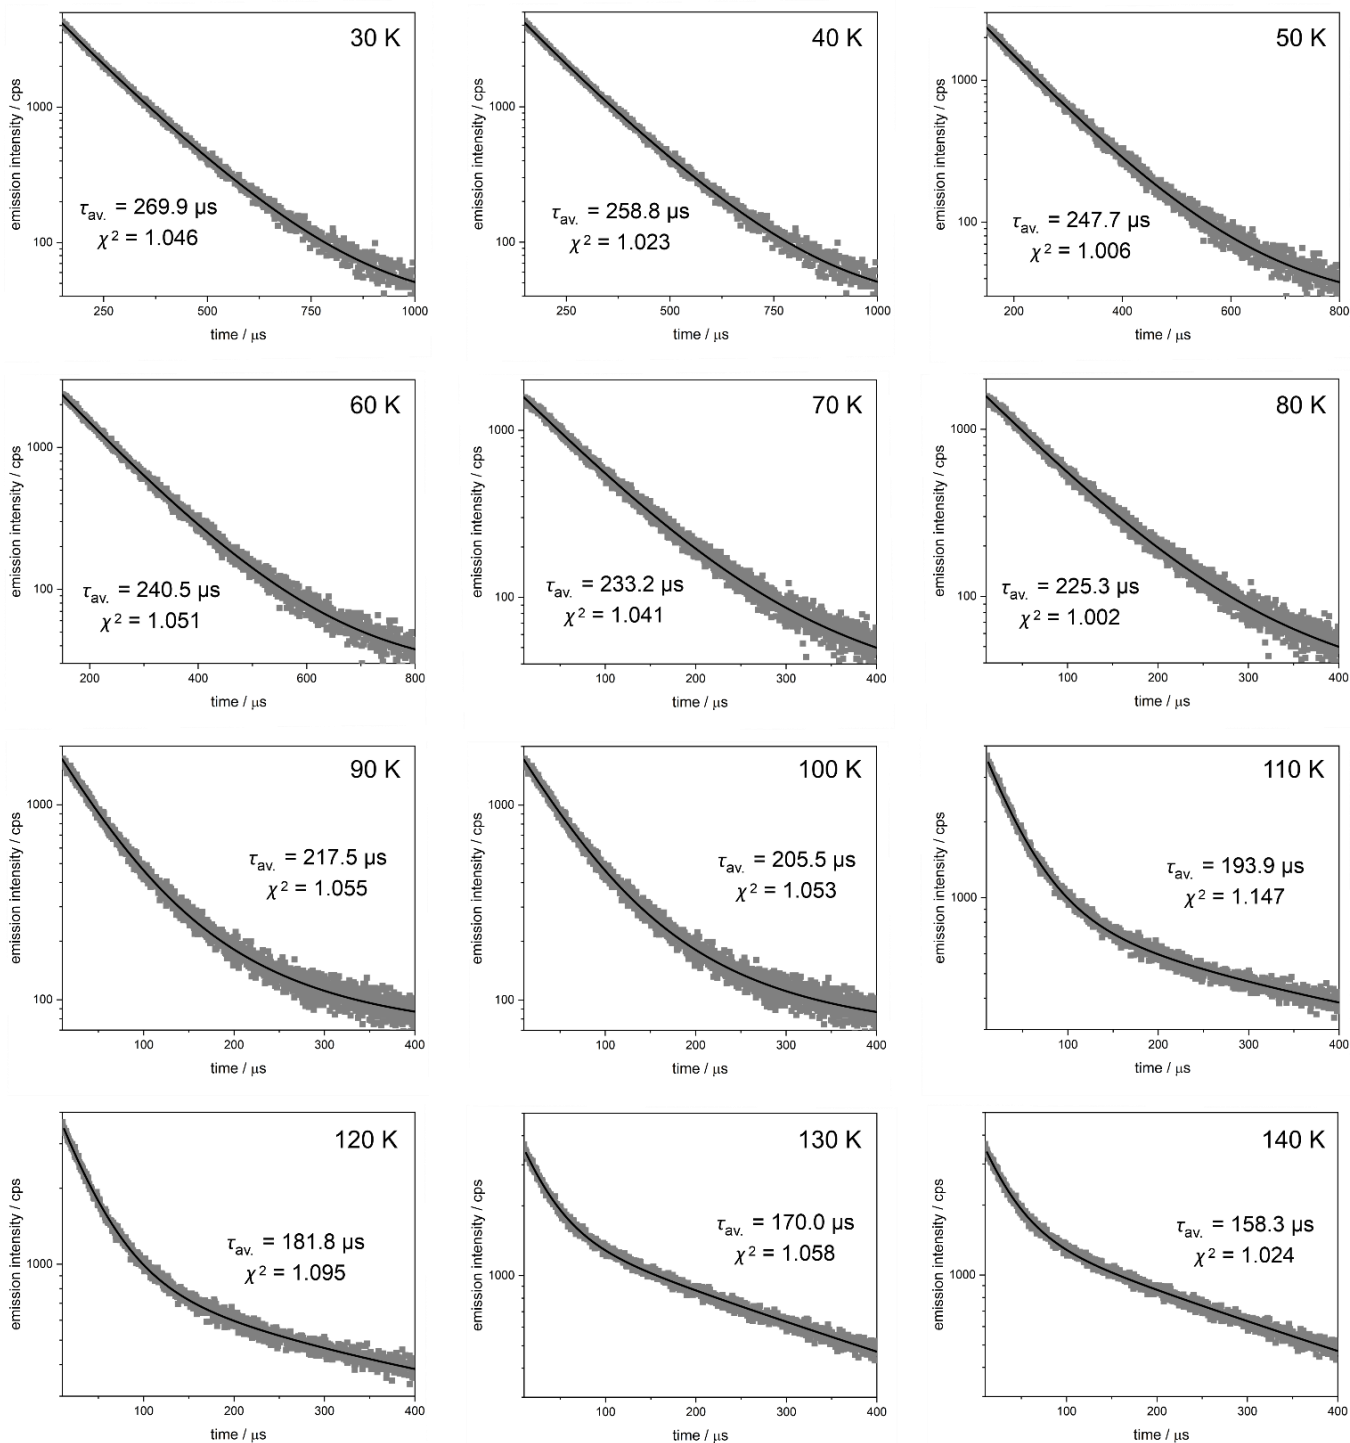

**Fig. S70** (part 1 of 3) Temperature-variable emission decay profiles for **Re<sub>2</sub>-bpbp** under  $\lambda_{exc} = 430$  nm and  $\lambda_{em} = 554$  nm, collected for the indicated temperatures from the 30–330 K range (in this part, the region of 30–140 K is shown). The double exponential fitting was applied for each temperature; the related best-fit curve is illustrated by a solid line). The best-fit parameters are roughly presented on the graphs while the detailed values are gathered in Table S77.

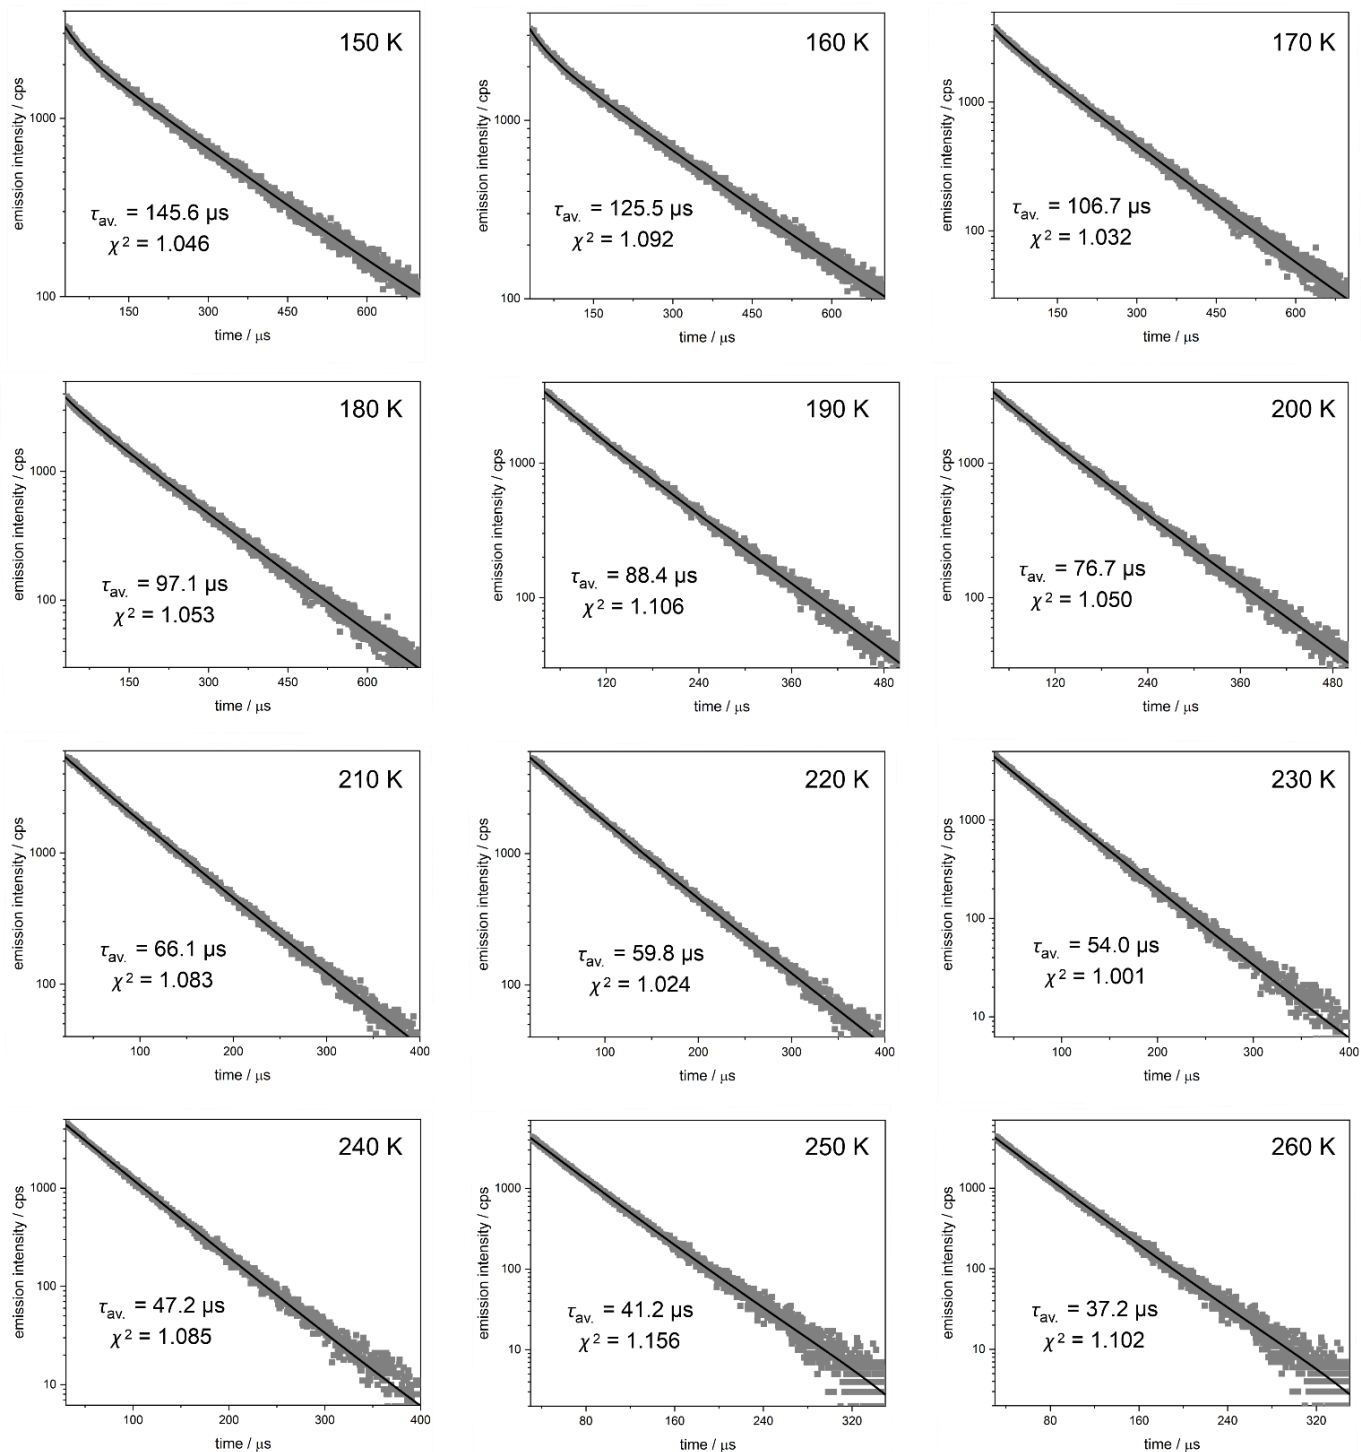

**Fig. S70** (part 2 of 3) Temperature-variable emission decay profiles for **Re<sub>2</sub>-bpbp** under  $\lambda_{\text{exc}} = 430 \text{ nm}$  and  $\lambda_{\text{em}} = 554 \text{ nm}$ , collected for the indicated temperatures from the 30–330 K range (in this part, the region of 150–260 K is shown). The double exponential fitting was applied for each temperature; the related best-fit curve is illustrated by a solid line). The best-fit parameters are roughly presented on the graphs while the detailed values are gathered in Table S77.

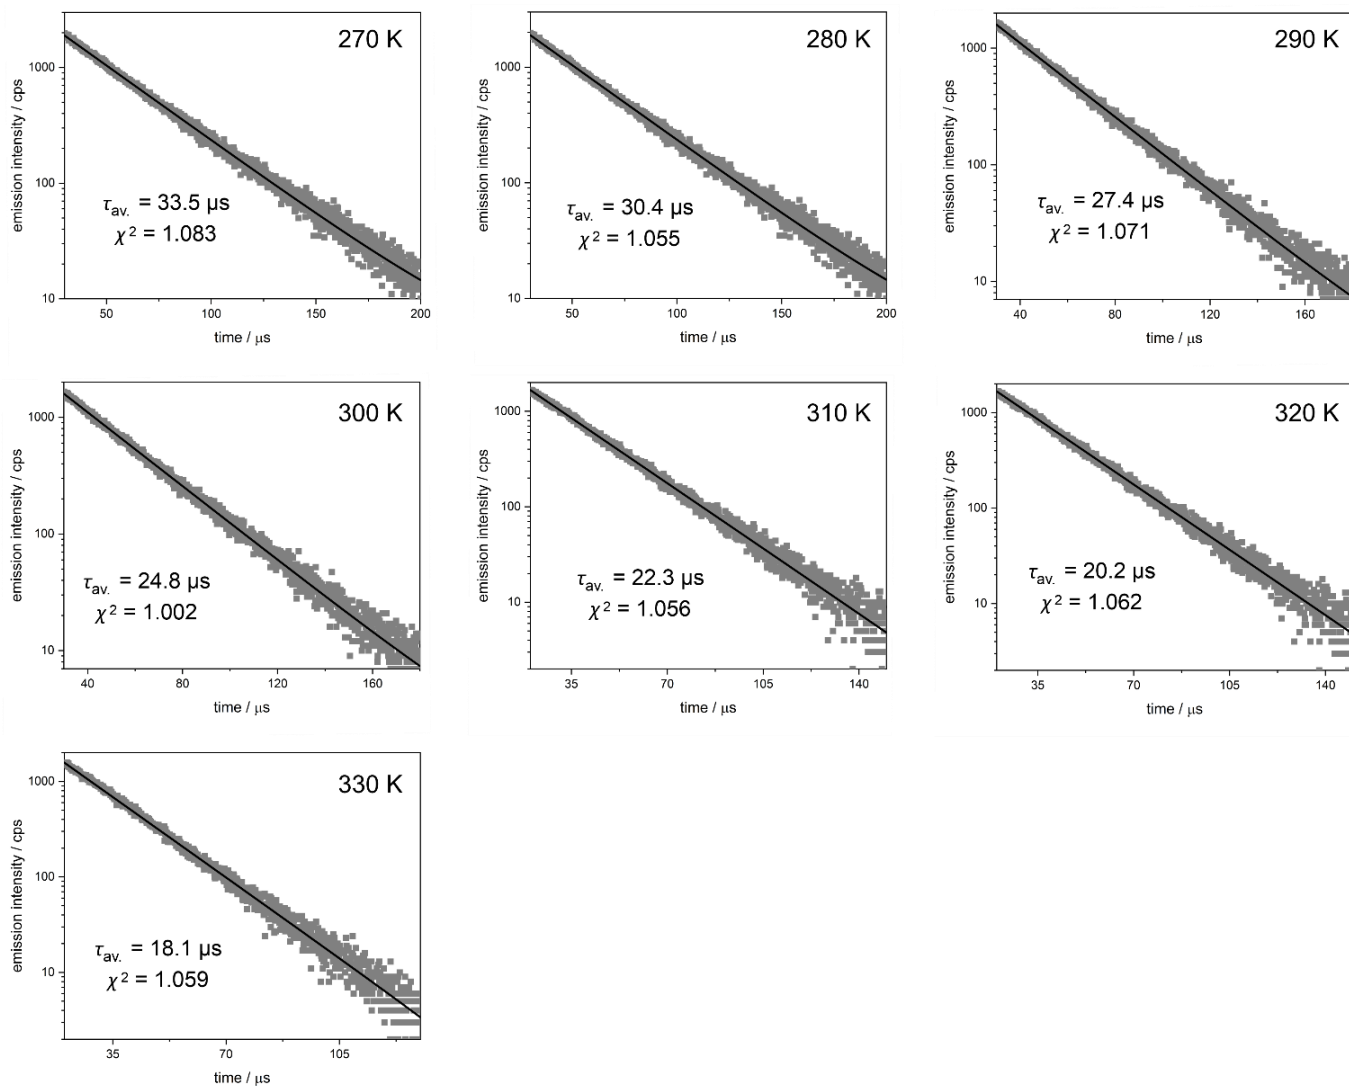

**Fig. S70** (part 3 of 3) Temperature-variable emission decay profiles for  $\text{Re}_2\text{-bpbb}$  under  $\lambda_{\text{exc}} = 430$  nm and  $\lambda_{\text{em}} = 554$  nm, collected for the indicated temperatures from the 30–330 K range (in this part, the region of 270–330 K is shown). The double exponential fitting was applied for each temperature; the related best-fit curve is illustrated by a solid line). The best-fit parameters are roughly presented on the graphs while the detailed values are gathered in Table S77.

**Table S77** Best-fit parameters for the emission decay profiles of **Re<sub>2</sub>-bpbp** to the double exponential decay function (represented by the  $\tau_1$  and  $\tau_2$  values of emission lifetime components, with the respective contributions given in the brackets next to the lifetime values), and the calculated weighted-average emission lifetime ( $\tau_{av.}$ ), all presented for the 30–330 K temperature range (see Fig. S70 for the respective emission decay profiles).

| parameter                    | <b>Re<sub>2</sub>-bpbp</b> |               |               |               |               |               |
|------------------------------|----------------------------|---------------|---------------|---------------|---------------|---------------|
|                              | 30 K                       | 40 K          | 50 K          | 60 K          | 70 K          | 80 K          |
| $\tau_1$ (%) / $\mu\text{s}$ | 103.5 (26.17)              | 101.2 (29.68) | 98.9 (33.19)  | 95.0 (34.64)  | 91.2 (36.09)  | 90.6 (37.55)  |
| $\tau_2$ (%) / $\mu\text{s}$ | 328.9 (73.83)              | 325.3 (70.32) | 321.7 (66.81) | 317.6 (65.36) | 313.4 (63.91) | 306.3(62.45)  |
| $\tau_{av.}$ / $\mu\text{s}$ | 269.9                      | 258.8         | 247.7         | 240.5         | 233.2         | 225.3         |
| $\chi^2$                     | 1.046                      | 1.023         | 1.006         | 1.051         | 1.041         | 1.002         |
|                              | 90 K                       | 100 K         | 110 K         | 120 K         | 130 K         | 140 K         |
| $\tau_1$ (%) / $\mu\text{s}$ | 89.9 (39.01)               | 87.3 (40.80)  | 84.6 (42.6)   | 80.5 (44.49)  | 76.3 (46.38)  | 73.8 (44.39)  |
| $\tau_2$ (%) / $\mu\text{s}$ | 299.1 (60.99)              | 287.1 (59.20) | 275.0 (57.4)  | 263.0 (55.51) | 251.0 (53.62) | 225.7 (55.61) |
| $\tau_{av.}$ / $\mu\text{s}$ | 217.5                      | 205.5         | 193.9         | 181.8         | 170.0         | 158.3         |
| $\chi^2$                     | 1.055                      | 1.053         | 1.147         | 1.095         | 1.058         | 1.024         |
|                              | 150 K                      | 160 K         | 170 K         | 180 K         | 190 K         | 200 K         |
| $\tau_1$ (%) / $\mu\text{s}$ | 71.3 (42.39)               | 69.9 (44.66)  | 68.6 (46.93)  | 66.8 (51.18)  | 65.1 (55.42)  | 61.5 (59.60)  |
| $\tau_2$ (%) / $\mu\text{s}$ | 200.3 (57.61)              | 170.4 (55.34) | 140.4 (53.07) | 128.9 (48.82) | 117.4 (44.58) | 99.1 (40.4)   |
| $\tau_{av.}$ / $\mu\text{s}$ | 145.6                      | 125.5         | 106.7         | 97.1          | 88.4          | 76.7          |
| $\chi^2$                     | 1.046                      | 1.092         | 1.032         | 1.053         | 1.106         | 1.050         |
|                              | 210 K                      | 220 K         | 230 K         | 240 K         | 250 K         | 260 K         |
| $\tau_1$ (%) / $\mu\text{s}$ | 57.8 (63.78)               | 54.4 (68.70)  | 51.0 (73.61)  | 46.0 (83.90)  | 41.0 (94.18)  | 37.2 (100)    |
| $\tau_2$ (%) / $\mu\text{s}$ | 80.9 (36.22)               | 71.6 (31.30)  | 62.3 (26.39)  | 53.5 (16.10)  | 44.8 (5.82)   | –             |
| $\tau_{av.}$ / $\mu\text{s}$ | 66.1                       | 59.8          | 54.0          | 47.2          | 41.2          | 37.2          |
| $\chi^2$                     | 1.083                      | 1.024         | 1.001         | 1.085         | 1.156         | 1.102         |
|                              | 270 K                      | 280 K         | 290 K         | 300 K         | 310 K         | 320 K         |
| $\tau_1$ (%) / $\mu\text{s}$ | 33.5 (100)                 | 30.4 (100)    | 27.4 (100)    | 24.8 (100)    | 22.3 (100)    | 20.2 (100)    |
| $\tau_2$ (%) / $\mu\text{s}$ | –                          | –             | –             | –             | –             | –             |
| $\tau_{av.}$ / $\mu\text{s}$ | 33.5                       | 30.4          | 27.4          | 24.8          | 22.3          | 20.2          |
| $\chi^2$                     | 1.083                      | 1.055         | 1.071         | 1.002         | 1.056         | 1.062         |
|                              | 330 K                      | –             | –             | –             | –             | –             |
| $\tau_1$ (%) / $\mu\text{s}$ | 18.1 (100)                 | –             | –             | –             | –             | –             |
| $\tau_2$ (%) / $\mu\text{s}$ | –                          | –             | –             | –             | –             | –             |
| $\tau_{av.}$ / $\mu\text{s}$ | 18.1                       | –             | –             | –             | –             | –             |
| $\chi^2$                     | 1.059                      | –             | –             | –             | –             | –             |

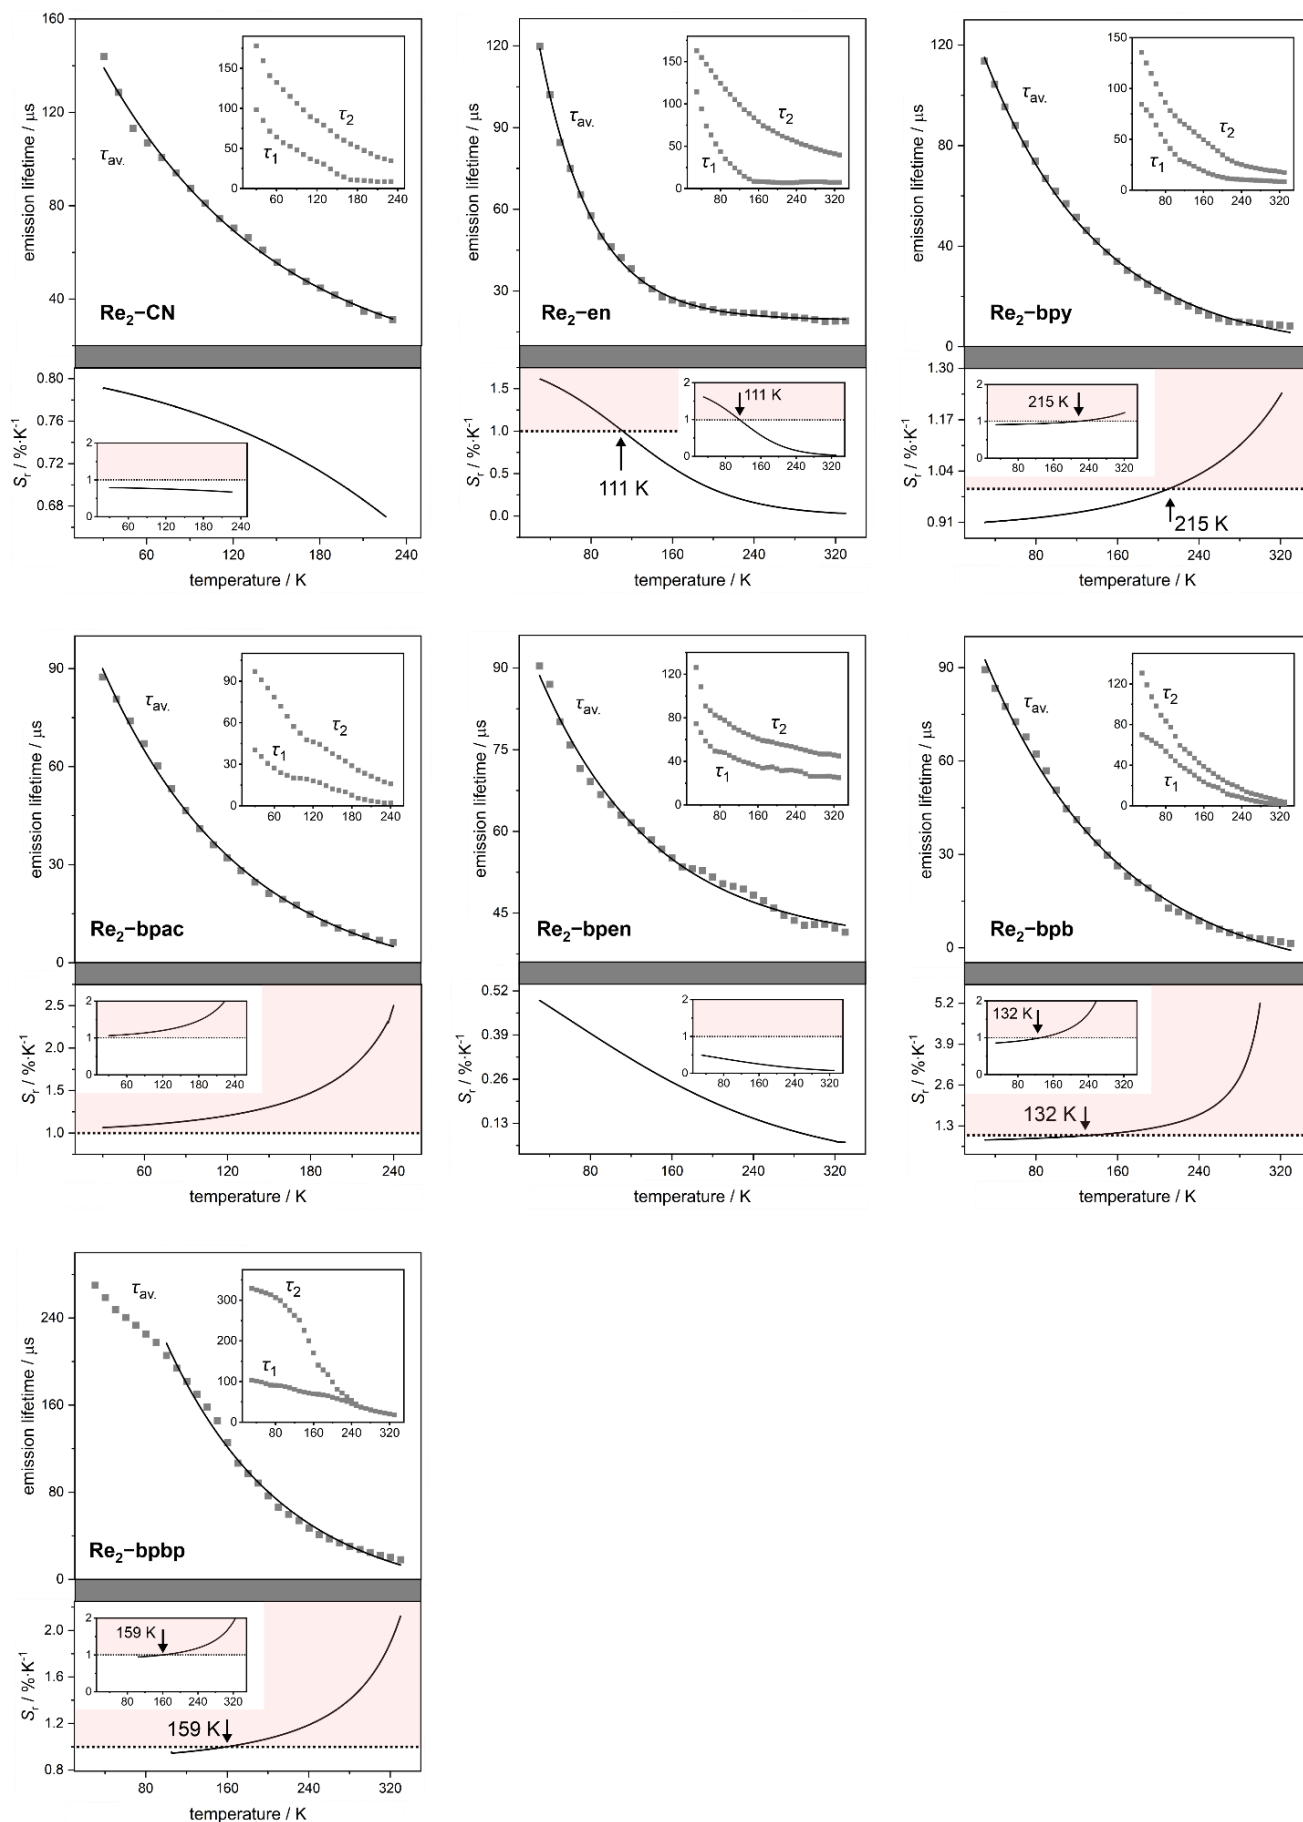

**Fig. S71** Temperature dependencies of emission lifetimes ( $\tau_1$  and  $\tau_2$ ; obtained from fitting to the double exponential decay functions; the insets) and the calculated weighted-average emission lifetime ( $\tau_{av}$ ; main graphs) for  $\text{Re}_2\text{-CN}$ ,  $\text{Re}_2\text{-en}$ ,  $\text{Re}_2\text{-bpy}$ ,  $\text{Re}_2\text{-bpac}$ ,  $\text{Re}_2\text{-bpen}$ ,  $\text{Re}_2\text{-bpb}$ , and  $\text{Re}_2\text{-bppb}$  (Fig. S64–S70, Tables S71–S77), with the best-fit curves (solid lines) obtained using the exponential fitting, shown together with the relative thermal sensitivity ( $S_r$ ) curves (under the corresponding fits). The resulting best-fit parameters are collected in Table S78.

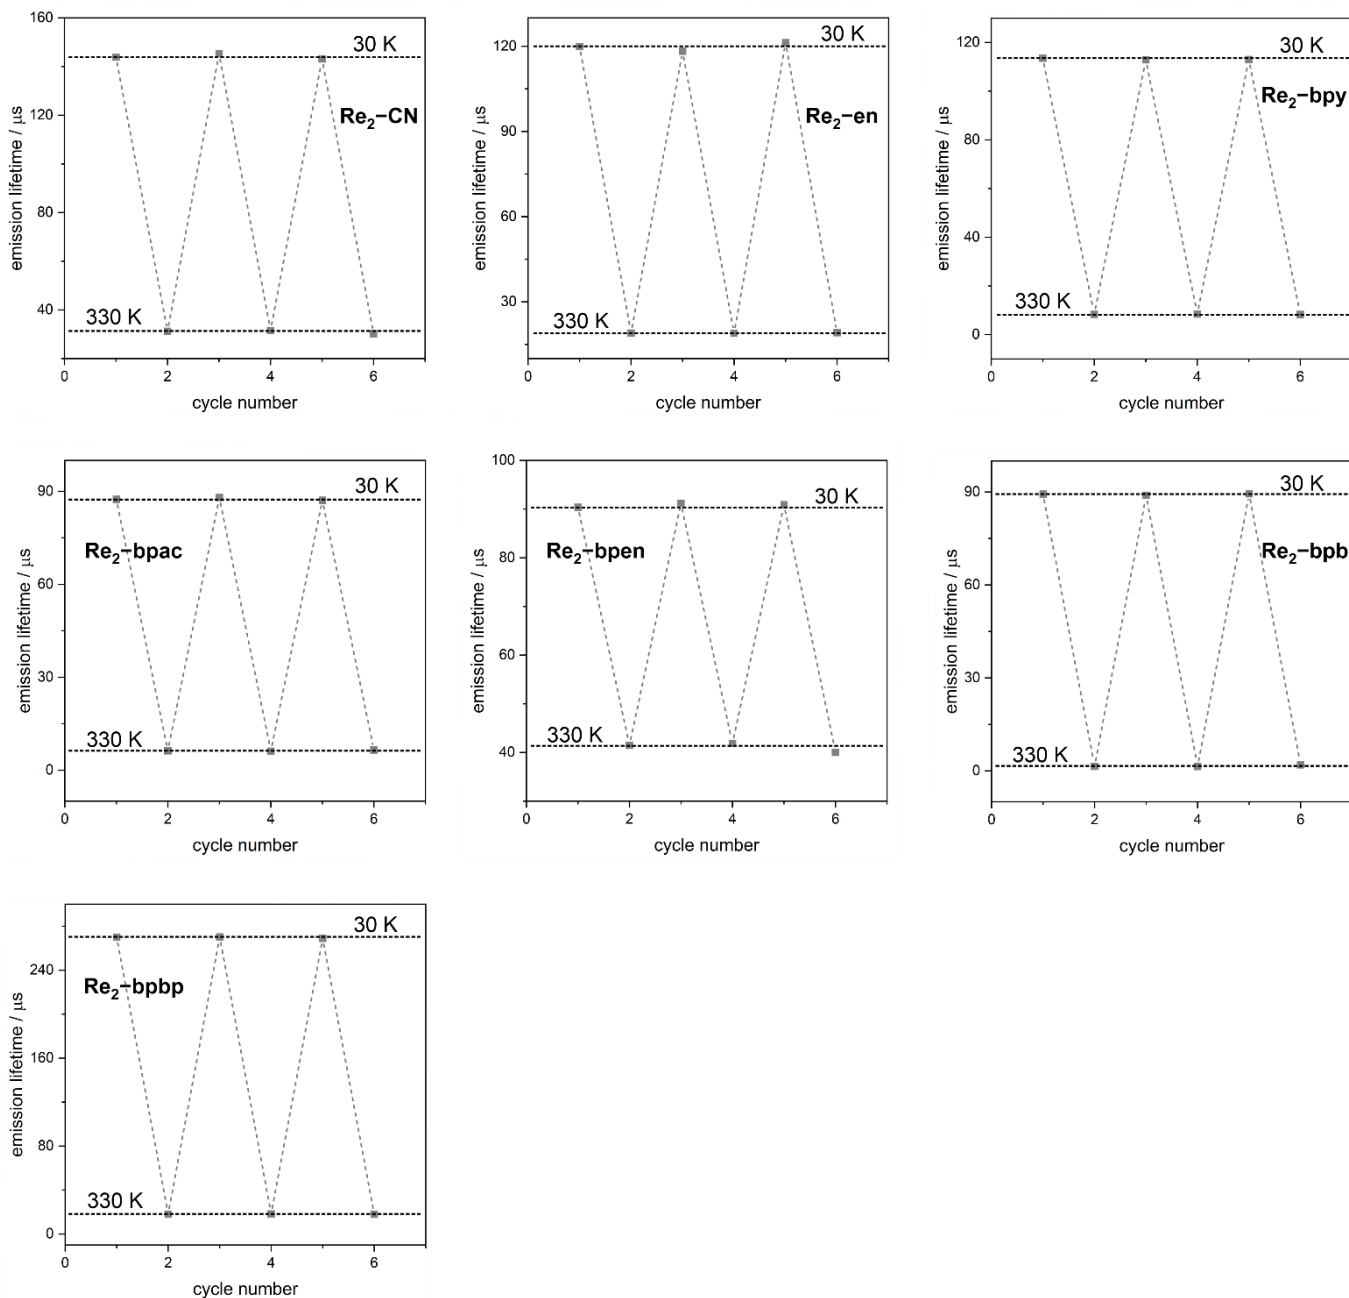

**Fig. S72** Thermal repeatability curves of the application of a weighted-average emission lifetime ( $\tau_{av.}$ ) as a thermometric parameter, presented for six consecutive measurements for  $\text{Re}_2\text{-CN}$ ,  $\text{Re}_2\text{-en}$ ,  $\text{Re}_2\text{-bpy}$ ,  $\text{Re}_2\text{-bpac}$ ,  $\text{Re}_2\text{-bpen}$ ,  $\text{Re}_2\text{-bpb}$ , and  $\text{Re}_2\text{-bpbp}$  (see Fig. S72 for comparison). Please note  $\text{Re}_2\text{-bpee}$  does not appear here and other Fig./tables related to the optical thermometry based on emission lifetimes as its values of emission lifetimes were too short to be reliably followed experimentally and thus used for optical thermometry.



**Table S78** Best-fit parameters for the exponential fitting of the temperature dependencies of the weighted-average emission lifetime ( $\tau_{av.}$ ) for **Re<sub>2</sub>-CN**, **Re<sub>2</sub>-en**, **Re<sub>2</sub>-bpy**, **Re<sub>2</sub>-bpac**, **Re<sub>2</sub>-bpen**, **Re<sub>2</sub>-bpb**, and **Re<sub>2</sub>-bpbp**, investigated within the indicated temperature ranges (see Fig. S71 for the visualization of the related best-fit curves and experimental data).

| Material                   | Temp. range / K | Equation: $\tau_{av.} = A+B \cdot \exp(C \cdot T)$ |              |                | $\chi^2 / \%$ | $S_r^{max} / \% \cdot K^{-1}$ | T for $S_r^{max} / K$ |
|----------------------------|-----------------|----------------------------------------------------|--------------|----------------|---------------|-------------------------------|-----------------------|
|                            |                 | A / $\mu s$                                        | B / $\mu s$  | C / $K^{-1}$   |               |                               |                       |
| <b>Re<sub>2</sub>-CN</b>   | 30–230          | 6.2(0.86)                                          | 170.2(2.71)  | -0.008(0.0006) | 99.8          | 0.79                          | 30                    |
| <b>Re<sub>2</sub>-en</b>   | 30–330          | 19.3(0.26)                                         | 177.7(2.11)  | -0.019(0.0003) | 99.9          | 1.61                          | 30                    |
| <b>Re<sub>2</sub>-bpy</b>  | 30–330          | -2.4(0.95)                                         | 153.6(1.20)  | -0.009(0.0002) | 99.9          | 1.24                          | 330                   |
| <b>Re<sub>2</sub>-bpac</b> | 300–240         | -7.4(1.21)                                         | 130.8(1.29)  | -0.010(0.0004) | 99.8          | 2.50                          | 240                   |
| <b>Re<sub>2</sub>-bpee</b> | 30–330          | 39.3(0.98)                                         | 64.3(1.22)   | -0.009(0.0005) | 99.3          | 0.49                          | 30                    |
| <b>Re<sub>2</sub>-bpb</b>  | 30–330          | -11.3(1.49)                                        | 130.5(1.31)  | -0.008(0.0003) | 99.7          | 5.20                          | 300                   |
| <b>Re<sub>2</sub>-bpbp</b> | 100–330         | -19.1(7.910)                                       | 559.9(27.76) | -0.009(0.0007) | 99.4          | 2.12                          | 330                   |

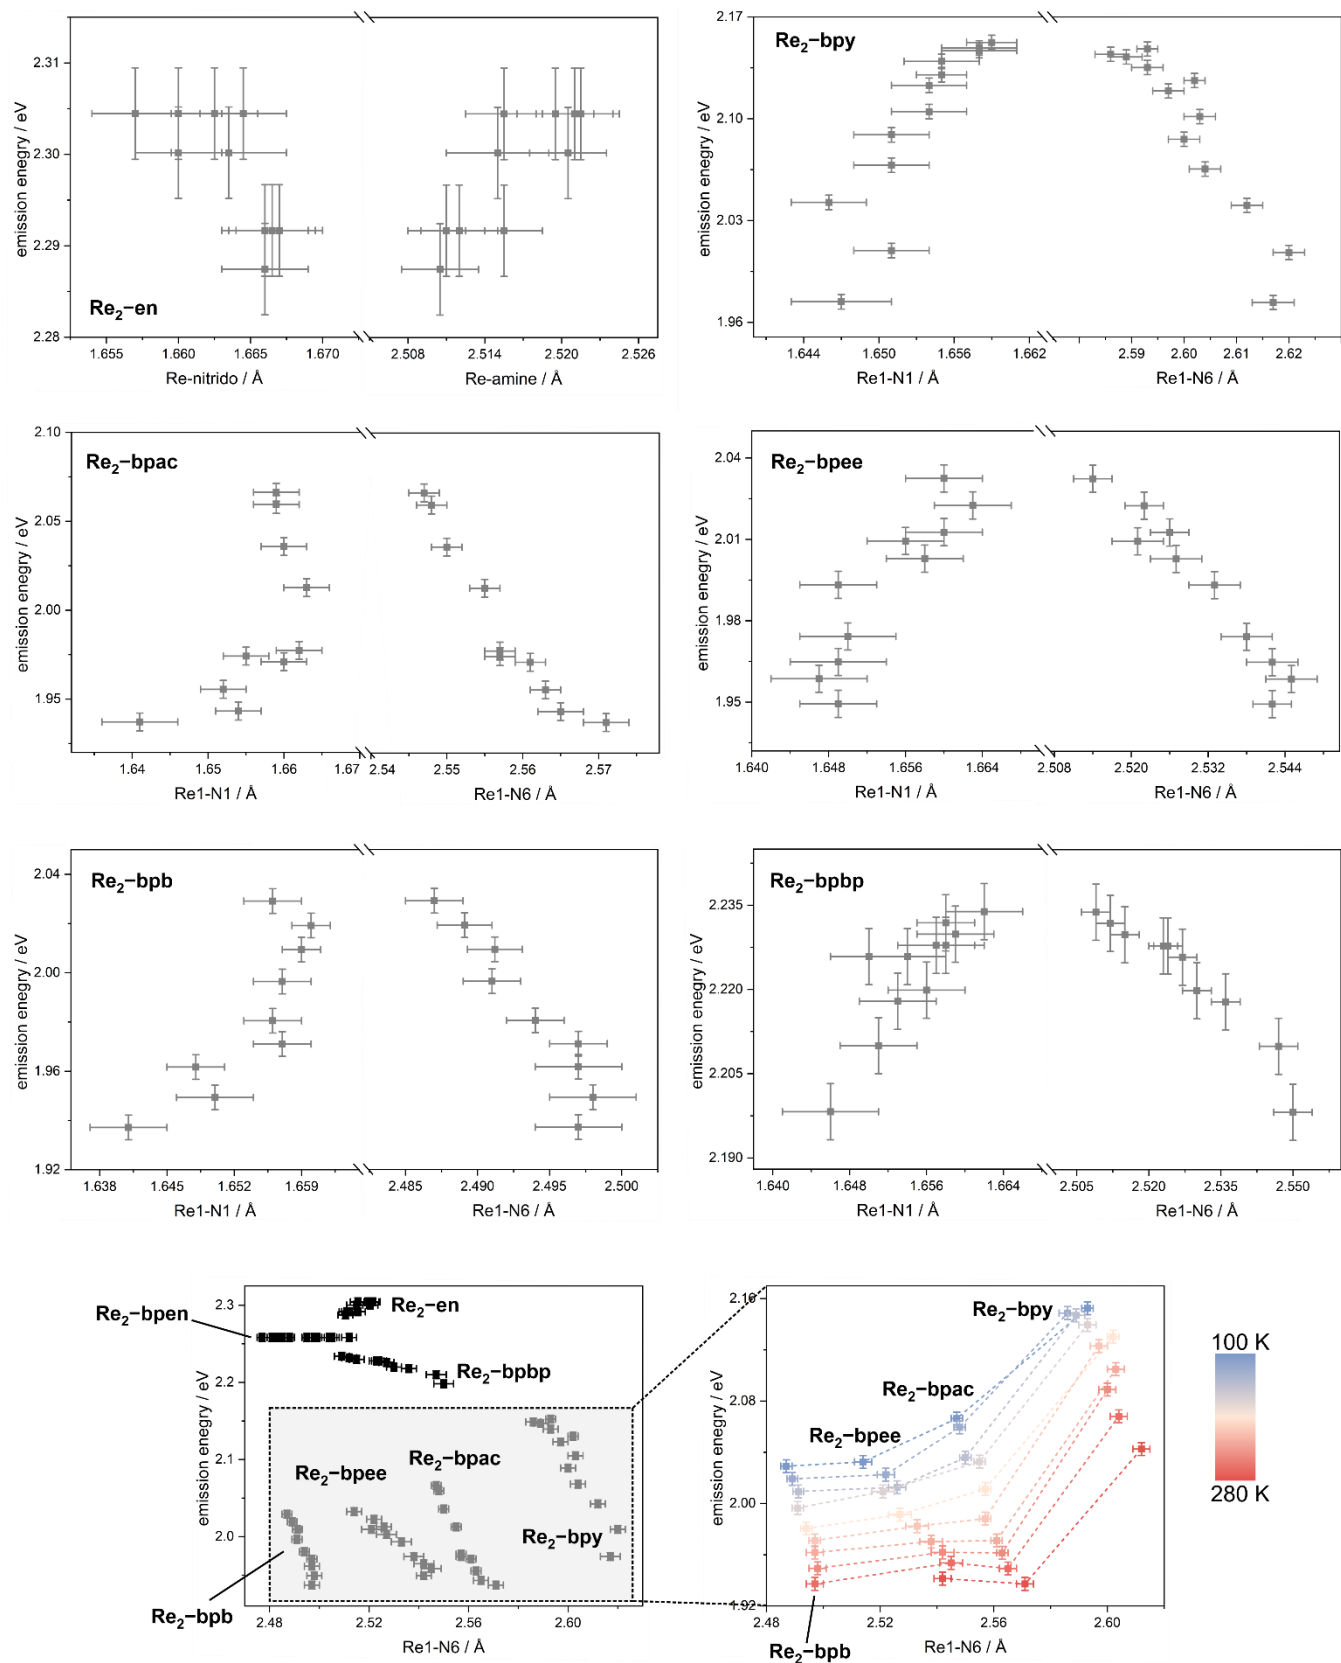

**Fig. S73** The detailed insight into the dependence of emission maximum energy on the Re1-N1 and Re1-N6 bond distances under variable temperature from the 100–280 K range in the whole series of reported materials, i.e.,  **$\text{Re}_2\text{-en}$** ,  **$\text{Re}_2\text{-bpy}$** ,  **$\text{Re}_2\text{-bpac}$** ,  **$\text{Re}_2\text{-bpee}$** ,  **$\text{Re}_2\text{-bpen}$** ,  **$\text{Re}_2\text{-bpb}$** , and  **$\text{Re}_2\text{-bpbp}$** . The bottom part of the figure includes the comparison between the materials while above the separate graphs for each compound are presented.

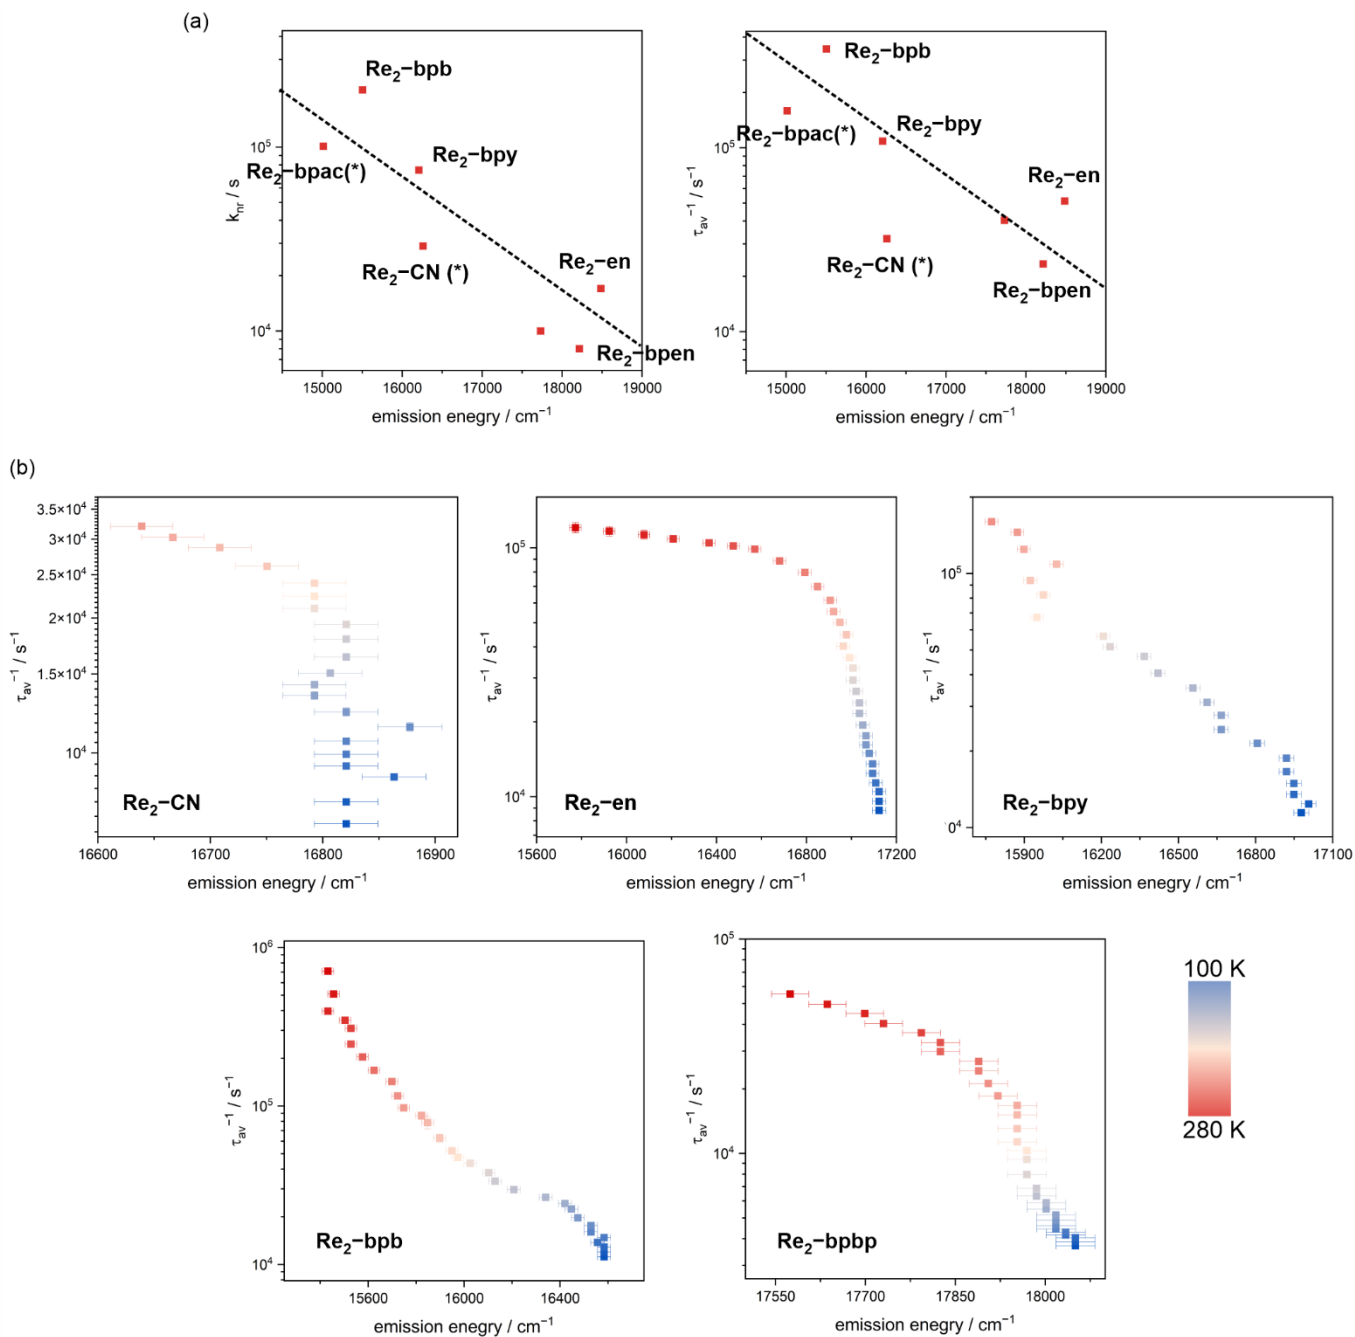

**Fig. S74** The correlation of non-radiative decay rate constant and luminescence lifetime with the emission energies at room temperature within selected materials in the **Re<sub>2</sub>-L** series (a), and the correlation between T-dependent lifetimes and emission energies for **Re<sub>2</sub>-CN**, **Re<sub>2</sub>-en**, **Re<sub>2</sub>-bpy**, **Re<sub>2</sub>-bpb**, and **Re<sub>2</sub>-bppb**.

## References to the Supporting Information

- S1 – M. Seike, K. Nagata, H. Ikeda, A. Ito, E. Sakuda, N. Kitamura, A. Shinohara and T. Yoshimura, Synthesis and Photoluminescence of Tetracyanonitridorhenium(V) Complexes with Five-Membered *N*-Heteroaromatic Ligands and Photoluminescence-Intensity Change, *ACS Omega*, 2019, **4**, 21251–21259.
- S2 – L.-J. Luo, Q.-Q. Su, S.-C. Cheng, J. Xiang, W.-L. Man, W.-M. Shu, M.-H. Zeng, S.-M. Yiu, C.-C. Ko and T.-C. Lau, Tunable Luminescent Properties of Tricyanoosmium Nitrido Complexes Bearing a Chelating O<sup>N</sup> Ligand, *Inorg. Chem.*, 2020, **59**, 4406–4413.
- S3 – M. Llunell, D. Casanova, J. Cirera, J. Bofill, P. Alemany, S. Alvarez, M Pinsky and D. Avnir, Program for the Stereochemical Analysis of Molecular Fragments by Means of Continuous Shape Measures and Associated Tools, SHAPE v. 2.1.; University of Barcelona: Barcelona, Spain, 2013.
- S4 – D. Casanova, J. Cirera, M. Llunell, P. Alemany, D. Avnir and S. Alvarez, Minimal Distortion Pathways in Polyhedral Rearrangements, *J. Am. Chem. Soc.*, 2004, **126**, 1755–1763.
- S5 – H. Ikeda, A. Ito, E. Sakuda, N. Kitamura, T. Takayama, T. Sekine, A. Shinohara and T. Yoshimura, Excited-State Characteristics of Tetracyanonitridorhenium(V) and -technetium(V) Complexes with *N*-Heteroaromatic Ligands, *Inorg. Chem.*, 2013, **52**, 6319–6327.
- S6 – M. Liberka, M. Zychowicz, J. Hooper, K. Nakabayashi, S. Ohkoshi and S. Chorazy, Synchronous Switching of Dielectric Constant and Photoluminescence in Cyanidonitridorhenate-Based Crystals, *Angew. Chem. Int. Ed.*, 2023, **62**, e202308284.
- S7 – M. J. Frisch, G. W. Trucks, H. B. Schlegel, G. E. Scuseria, M. A. Robb, J. R. Cheeseman, G. Scalmani, V. Barone, G. A. Petersson, H. Nakatsuji, X. Li, M. Caricato, A. V. Marenich, J. Bloino, B. G. Janesko, R. Gomperts, B. Mennucci, H. P. Hratchian, J. V. Ortiz, A. F. Izmaylov, J. L. Sonnenberg, D. Williams-Young, F. Ding, F. Lipparini, F. Egidi, J. Goings, B. Peng, A. Petrone, T. Henderson, D. Ranasinghe, V. G. Zakrzewski, J. Gao, N. Rega, G. Zheng, W. Liang, M. Hada, J. M. Ehara, K. Toyota, R. Fukuda, J. Hasegawa, M. Ishida, T. Nakajima, Y. Hondo, O. Kitao, H. Nakai, T. Vreven, K. Throssell, J. A. Montgomery J. E. Peralta, F. Ogliaro, M. J. Bearpark, J. J. Heyd, E. N. Brothers, K. N. Kudin, V. N. Staroverov, T. A. Kobayashi, R. Keith, J. Normand, K. Raghavachari, A. P. Rendell, J. C. Burant, S. S. Iyengar, J. Tomasi, M. Cossi, J. M. Millam, M. Klene, C. Adamo, R. Cammi, J. W. Ochterski, R. L. Martin, K. Morokuma, O. Farkas, J. B. Foresman and D. J. Fox, Gaussian 16, Revision C.01, Gaussian, Inc.: Wallingford CT, United States, 2016.
- S8 – C. Adamo and V. Barone, Toward reliable density functional methods without adjustable parameters: The PBE0 model, *J. Chem. Phys.*, 1999, **110**, 6158–6170.
- S9 – F. Weigend and R. Ahlrichs, Balanced basis sets of split valence, triple zeta valence and quadruple zeta valence quality for H to Rn: Design and assessment of accuracy, *Phys. Chem. Chem. Phys.*, 2005, **7**, 3297–3305.
- S10 – J. Tomasi, B. Mennucci and R. Cammi, Quantum Mechanical Continuum Solvation Models, *Chem. Rev.*, 2005, **105**, 2999–3093.
- S11 – S. Grimme, S. Ehrlich and L. Goerigk, Effect of the damping function in dispersion corrected density functional theory, *J. Comp. Chem.* 2011, **32**, 1456–1465.
- S12 – M. E. Casida, C. Jamorski, K. C. Casida and D. R. Salahub, Molecular excitation energies to high-lying bound states from time-dependent density-functional response theory: Characterization and correction of the time-dependent local density approximation ionization threshold, *J. Chem. Phys.*, 1998, **108**, 4439–4449.
- S13 – F. Neese, F. Wennmohs, U. Becker and C. Riplinger, The ORCA quantum chemistry program package, *J. Chem. Phys.*, 2020, **152**, 224108.
- S14 – A. D. Becke, Density-functional exchange-energy approximation with correct asymptotic behavior, *Phys. Rev. A*, 1988, **38**, 3098–3100.
- S15 – C. Lee, W. Yang and R. G. Parr, Development of the Colle-Salvetti correlation-energy formula into a functional of the electron density, *Phys. Rev. B*, 1988, **37**, 785–789.

- S16 – B. De Souza, G. Farias, F. Neese and R. Izsak, Predicting Phosphorescence Rates of Light Organic Molecules Using Time-Dependent Density Functional Theory and the Path Integral Approach to Dynamics, *J. Chem. Theory Comput.*, 2019, **15**, 1896–1904.
- S17 – C. Latouche, D. Skouteris, F. Palazzetti and V. Barone, TD-DFT Benchmark on Inorganic Pt(II) and Ir(III) Complexes, *J. Chem. Theory Comput.*, 2015, **11**, 3281–3289.
- S18 – E. Caldeweyher, S. Ehlert, A. Hansen, H. Neugebauer, S. Spicher, C. Bannwarth and S. A Grimme, A generally applicable atomic-charge dependent London dispersion correction, *J. Chem. Phys.*, 2019, **150**, 154122.
- S19 – R. Cammi, B. Mennucci and J. Tomasi, Fast Evaluation of Geometries and Properties of Excited Molecules in Solution: A Tamm-Dancoff Model with Application to 4-Dimethylaminobenzonitrile, *J. Phys. Chem. A*, 2000, **104**, 5631–5637.
- S20 – E. Van Lenthe, E. J. Baerends and J. G. Snijders, Relativistic regular two-component Hamiltonians, *J. Chem. Phys.*, 1993, **99**, 4597–4610.
- S21 – C. Van Wüllen, Molecular density functional calculations in the regular relativistic approximation: Method, application to coinage metal diatomics, hydrides, fluorides and chlorides, and comparison with first-order relativistic calculations, *J. Chem. Phys.*, 1998, **109**, 392–399.
- S22 – D. A. Pantazis, X.-Y. Chen, C. R. Landis and F. Neese, All-Electron Scalar Relativistic Basis Sets for Third-Row Transition Metal Atoms, *J. Chem. Theory Comput.*, 2008, **4**, 908–919.
- S23 – M. Bühl, C. Reimann, D. A. Pantazis, T. Bredow and F. Neese, Geometries of Third-Row Transition-Metal Complexes from Density-Functional Theory, *J. Chem. Theory Comput.*, 2008, **4**, 1449–1459.
- S24 – F. Neese, F. Wnmmohs, A. Hansen and U. Becker, Efficient, approximate and parallel Hartree-Fock and hybrid DFT calculations. A ‘chain-of-spheres’ algorithm for the Hartree-Fock exchange, *Chem. Phys.*, 2009, **356**, 98–109.
- S25 – R. Izsák and F. Neese, An overlap fitted chain of spheres exchange method, *J. Chem. Phys.*, 2011, **135**, 144105.
- S26 – F. Neese, Efficient and accurate approximations to the molecular spin-orbit coupling operator and their use in molecular g-tensor calculations, *J. Chem. Phys.*, 2005, **122**, 034107.
- S27 – G. Kresse and J. Furthmüller, Efficiency of ab-initio total energy calculations for metals and semiconductors using a plane-wave basis set, *Comput. Mater. Sci.*, 1996, **6**, 15–50.
- S28 – J. P. Perdew, K. Burke and M. Ernzerhof, Generalized Gradient Approximation Made Simple, *Phys. Rev. Lett.*, 1996, **77**, 3865.
- S29 – A. V. Krukau, O. A. Vydrov, A. F. Izmaylov and G. E. Scuseria, Influence of the exchange screening parameter on the performance of screened hybrid functionals, *J. Chem. Phys.*, 2006, **125**, 224106.
- S30 – P. E. Blöchl, Projector augmented-wave method, *Phys. Rev. B*, 1994, **50**, 17953–17979.
- S31 – K. Momma and F. Izumi, VESTA 3 for three-dimensional visualization of crystal, volumetric and morphology data, *J. Appl. Crystallogr.*, 2011, **44**, 1272–1276.
- S32 – A. Ćirić and M. D. Dramićanin, LumTHools - Software for fitting the temperature dependence of luminescence emission intensity, lifetime, bandshift, and bandwidth and luminescence thermometry and review of the theoretical models, *J. Lumin.*, 2022, **252**, 119413.
